# Supplementary material
Source: publisher figshare collection journal article supplement (https://diabetesjournals.figshare.com/articles/dataset/_/20510979)
Supplement: Supplementary file 1 [file 1]

## Sheet: Lipid Name Abbrev
Glossary of RefMet lipid compound name abbreviations.
RefMet Abbreviation	Super Class	Main Class	Sub Class
EpETrE	Fatty acyls	Eicosanoids	Dpoxy eicosatrienoic acid
HETE	Fatty acyls	Eicosanoids	Hdroxy eicosatetraenoic acid
oxo ETE	Fatty acyls	Eicosanoids	Oxo eicosatetraenoic acid
CAR	Fatty esters	Acyl carnitines	Acyl carnitines
DG	Glycerolipids	Diradylglycerols	Diacyl glycerols
LPC	Glycerophospholipids	Glycerophosphocholines	Lysophosphatidylcholines
PC	Glycerophospholipids	Glycerophosphocholines	Phosphatidylcholines
LPE	Glycerophospholipids	Glycerophosphoethanolamines	Lysophosphatidylethanolamines
PE	Glycerophospholipids	Glycerophosphoethanolamines	Phosphatidylethanolamines
AMP	Nucleic acids	Purines	Adenosine monophosphate
DMGV	Organic acids	Keto acids	Dimethylguanidino valeric acid
CER	Sphingolipids	Ceramides	Ceramides
SM	Sphingolipids	Sphingomyelins	Sphingomyelins

## Sheet: Tbl1
Supplementary Table 1. Baseline clinical characteristics of individuals in the whole and metabolomics cohorts of JHS
	Whole (n=5306)	Metabolomics (n=2750)
Age, yr	55.3 (12.9)	56.4 (12.7)
Female, %	3,367 (63)	1,704 (62)
BMI, kg/m2	31.8 (7.2)	31.7 (7.1)
eGFR (ckdepi), mL/min/1.73m2	94.2 (22.0)	93.0 (22.5)
Total Cholesterol, mg/dL	199.3 (40.1)	199.8 (41.0)
High density lipoprotein, md/dL	51.8 (14.6)	51.8 (14.7)
Systolic Blood Pressure, mmHg	127.5 (16.9)	127.7 (16.7)
Hypertension,%	2,996 (56)	1,618 (59)
Current Smoker, %	693 (13)	335 (12)
Prevalent Diabetes, %	1,168 (22)	710 (26)
Mean (SD) are listed unless otherwise noted.

## Sheet: Tbl2
Supplemental Table 2. LC-MS features associations with measures of adiposity, dysglycemia, insulin resistance, dyslipidemia, and prevalent diabetes.
									Pravelent Diabetes						BMI						FPG						HOMA-IR						Triglycerides
RefMet Name	HMDB ID	Compound ID	Study Compound Name	LC-MS Method	Targeted Method	M/Z	RT	Primary Feature/Ion	Effect Size (OR)	95% CI	P	FDR q (1948 peaks)	FDR q (1434 primary features)	N	Effect Size (Beta)	95% CI	P	FDR q (1948 peaks)	FDR q (1434 primary features)	N	Effect Size (Beta)	95% CI	P	FDR q (1948 peaks)	FDR q (1434 primary features)	N	Effect Size (Beta)	95% CI	P	FDR q (1948 peaks)	FDR q (1434 primary features)	N	Effect Size (Beta)	95% CI	P	FDR q (1948 peaks)	FDR q (1434 primary features)	N
PE(38:4)	HMDB0009003	QI4663	c38_4_pe	HILIC	TRUE	768.552	5.58	TRUE	1.51223	(1.3721057,1.6666614)	0	0	0	2749	0.0017044	(-0.0034856,0.0068944)	0.519674	0.639254	0.635464	2745	0.587757	(0.4343999,0.7411138)	7.82409e-14	9.18152e-13	1.02933e-12	2539	0.0870226	(0.0119215,0.1621238)	0.0231649	0.0510466	0.0492856	1964	1.19645	(1.1414727,1.2514193)	2.6495e-300	4.69202e-298	5.42769e-298	2537
PE(36:2)	HMDB0008994	QI4736	c36_2_pe	HILIC	TRUE	744.553	5.65	TRUE	1.54449	(1.4049430,1.6978995)	0	0	0	2749	-0.0011173	(-0.0063906,0.0041559)	0.677824	0.765894	0.76355	2745	0.645267	(0.4931009,0.7974324)	1.47409e-16	2.06585e-15	2.4021e-15	2539	0.159982	(0.0857929,0.2341711)	2.45438e-05	8.85395e-05	8.93295e-05	1964	1.16805	(1.1126400,1.2234673)	7.5548e-286	1.2264e-283	1.3542e-283	2537
PE(36:4)	HMDB0007121	QI261	mz658_5401_rt1_69	HILIC	FALSE	658.54	1.69	TRUE	1.53816	(1.3983315,1.6919621)	0	0	0	2749	0.012985	(0.0076875,0.0182824)	1.62005e-06	6.77223e-06	6.93478e-06	2745	0.836332	(0.6809462,0.9917182)	1.63147e-25	3.69547e-24	4.58731e-24	2539	0.355737	(0.2820021,0.4294725)	8.35581e-21	1.28166e-19	1.51674e-19	1964	1.15047	(1.0918796,1.2090559)	9.5943e-256	1.33498e-253	1.37582e-253	2537
PE(36:4)	HMDB0008937	QI11511	c36_4_pe	HILIC	TRUE	740.522	5.61	TRUE	1.53893	(1.3975313,1.6946436)	0	0	0	2749	3.13e-05	(-0.0051323,0.0051950)	0.990515	0.9946	0.993981	2745	0.56926	(0.4168295,0.7216899)	3.23881e-13	3.5445e-12	3.96962e-12	2539	0.0008044	(-0.0743993,0.0760081)	0.983267	0.990425	0.990212	1964	1.01462	(0.9549427,1.0742916)	2.2306e-202	2.28695e-200	2.28477e-200	2537
PC(P-34:2)/PC(O-34:3)	HMDB0011211	QI10124	c34_3_pc_plasmalogen	HILIC	TRUE	742.574	6.75	TRUE	0.607445	(0.5533546,0.6668237)	0	0	0	2749	-0.020488	(-0.0257892,-0.0151869)	4.75945e-14	4.61264e-13	5.13162e-13	2745	-0.963142	(-1.1186357,-0.8076482)	4.89794e-33	1.73476e-31	2.00676e-31	2539	-0.516524	(-0.5886246,-0.4444238)	8.58018e-43	7.59736e-41	8.78856e-41	1964	-0.975844	(-1.0396816,-0.9120071)	3.2438e-169	2.10631e-167	2.44822e-167	2537
PC(P-34:0)_PC(O-34:1)	NA	QI6093	mz746_604_rt6_84	HILIC	FALSE	746.604	6.84	TRUE	0.58714	(0.5344046,0.6450782)	0	0	0	2749	-0.0247565	(-0.0300261,-0.0194869)	6.18824e-20	1.10594e-18	1.13768e-18	2745	-1.10184	(-1.2545542,-0.9491328)	8.49971e-44	5.1742e-42	5.29938e-42	2539	-0.599366	(-0.6699491,-0.5287823)	2.41585e-58	2.35304e-55	1.73216e-55	1964	-0.925015	(-0.9892696,-0.8607596)	1.162e-152	6.28771e-151	7.9348e-151	2537
deoxyDHCer (d18:0_24:1)	NA	QI15902	mz634_6486_rt1_72	HILIC	FALSE	634.649	1.72	TRUE	1.64366	(1.4803644,1.8249749)	0	0	0	2749	0.0190781	(0.0140159,0.0241402)	1.94e-13	1.80819e-12	2.00141e-12	2745	0.725145	(0.5760324,0.8742584)	3.35234e-21	6.4657e-20	7.63056e-20	2539	0.263373	(0.1913263,0.3354194)	1.06386e-12	8.56363e-12	9.24591e-12	1964	0.823784	(0.7610269,0.8865401)	5.5397e-130	2.50961e-128	3.17757e-128	2537
PC(P-34:1)_PC(O-34:2)	NA	QI6091	mz744_5891_rt6_84	HILIC	FALSE	744.589	6.84	TRUE	0.626943	(0.5709897,0.6883787)	0	0	0	2749	-0.0200353	(-0.0253574,-0.0147132)	2.06377e-13	1.90532e-12	2.0989e-12	2745	-0.878763	(-1.0357053,-0.7218208)	1.96748e-27	5.25021e-26	6.4122e-26	2539	-0.445852	(-0.5203888,-0.3713151)	9.20331e-31	2.80126e-29	3.38399e-29	1964	-0.844815	(-0.9116878,-0.7779416)	1.7191e-121	7.28001e-120	8.80425e-120	2537
NA	HMDB0007897*	QI6080	mz716_5575_rt6_79	HILIC	FALSE	716.558	6.79	TRUE	0.613837	(0.5606118,0.6721148)	0	0	0	2749	-0.0018586	(-0.0072256,0.0035084)	0.497177	0.621631	0.618345	2745	-0.948461	(-1.1034364,-0.7934855)	2.59708e-32	8.87563e-31	1.0345e-30	2539	-0.395188	(-0.4668169,-0.3235595)	1.52985e-26	3.46529e-25	4.21886e-25	1964	-0.786674	(-0.8539663,-0.7193813)	7.8358e-106	3.18003e-104	3.87467e-104	2537
NA	HMDB0007896*	QI6095	mz718_573_rt6_85	HILIC	FALSE	718.573	6.85	TRUE	0.601986	(0.5481995,0.6610493)	0	0	0	2749	-0.0029283	(-0.0083014,0.0024448)	0.28533	0.412944	0.409163	2745	-0.907514	(-1.0636030,-0.7514244)	2.12875e-29	6.18926e-28	7.44543e-28	2539	-0.385698	(-0.4600135,-0.3113822)	9.53195e-24	1.7684e-22	2.07103e-22	1964	-0.787464	(-0.8551081,-0.7198206)	4.8616e-105	1.93273e-103	2.32384e-103	2537
NA	NA	QI9368	mz151_951_rt8_1	HILIC	FALSE	151.951	8.1	TRUE	0.6639	(0.6064929,0.7267401)	0	0	0	2749	-0.0267578	(-0.0320472,-0.0214683)	8.2756e-23	2.06678e-21	2.15767e-21	2745	-0.808091	(-0.9652726,-0.6509103)	1.83941e-23	3.89475e-22	4.79584e-22	2539	-0.298934	(-0.3728742,-0.2249939)	3.68089e-15	3.67711e-14	4.02931e-14	1964	-0.661643	(-0.7315252,-0.5917605)	3.06767e-72	8.41665e-71	9.35966e-71	2537
Glycine	HMDB0000123	QI9373	glycine	HILIC	TRUE	76.0393	8.09	TRUE	0.61375	(0.5579614,0.6751167)	0	0	0	2749	-0.0374568	(-0.0426487,-0.0322650)	6.63955e-44	8.62256e-42	8.65556e-42	2745	-0.973497	(-1.1279627,-0.8190313)	4.13588e-34	1.54936e-32	1.79723e-32	2539	-0.507373	(-0.5797333,-0.4350136)	3.81498e-41	2.97263e-39	3.41918e-39	1964	-0.605651	(-0.6756168,-0.5356859)	2.74295e-61	6.2862e-60	6.90068e-60	2537
NA	NA	QI12583	mz538_5198_rt4_57	HILIC	FALSE	538.52	4.57	TRUE	0.663327	(0.6064589,0.7255272)	0	0	0	2749	-0.0119006	(-0.0172314,-0.0065697)	1.24647e-05	4.6875e-05	4.7162e-05	2745	-0.733192	(-0.8902228,-0.5761619)	1.08204e-19	1.95168e-18	2.24876e-18	2539	-0.309643	(-0.3824319,-0.2368549)	1.34969e-16	1.47708e-15	1.62643e-15	1964	-0.596564	(-0.6669175,-0.5262109)	5.2863e-59	1.14419e-57	1.24271e-57	2537
NA	NA	QI2940	mz238_1072_rt3_52	HILIC	FALSE	238.107	3.52	TRUE	2.41052	(2.1577198,2.6929349)	0	0	0	2749	0.0236184	(0.0186144,0.0286225)	4.19691e-20	7.56998e-19	7.81606e-19	2745	0.900696	(0.7638292,1.0375621)	6.03968e-37	2.67393e-35	2.98652e-35	2539	0.359796	(0.2993569,0.4202343)	1.7061e-30	4.88747e-29	5.82511e-29	1964	0.51727	(0.4546689,0.5798712)	2.95067e-56	6.18054e-55	6.71629e-55	2537
Alanine	HMDB0000161	QI6746	alanine	HILIC	TRUE	90.0551	7.98	TRUE	1.71141	(1.5559087,1.8824556)	0	0	0	2749	0.0285626	(0.0233042,0.0338209)	5.52174e-26	2.0295e-24	2.14005e-24	2745	1.07758	(0.9246183,1.2305460)	6.66982e-42	3.82141e-40	3.98522e-40	2539	0.530711	(0.4588794,0.6025424)	2.83073e-45	3.06348e-43	4.05927e-43	1964	0.574742	(0.5045928,0.6448920)	2.20575e-55	4.47583e-54	4.79249e-54	2537
DMGV	HMDB0240212	TF16	dmgv	HILIC	TRUE	202.119	8.05	TRUE	1.84658	(1.6584275,2.0560754)	0	0	0	2749	0.0418179	(0.0368326,0.0468032)	4.79378e-58	9.33828e-55	6.87428e-55	2745	0.724456	(0.5722780,0.8766336)	2.13561e-20	3.96207e-19	4.57084e-19	2539	0.70416	(0.6359361,0.7723844)	7.00113e-83	1.36382e-79	1.00396e-79	1964	0.555589	(0.4873367,0.6238406)	1.00086e-54	2.00997e-53	2.14214e-53	2537
NA	NA	QI10087	mz690_542_rt6_88	HILIC	FALSE	690.542	6.88	TRUE	0.613092	(0.5605372,0.6705741)	0	0	0	2749	-0.0004815	(-0.0058240,0.0048610)	0.859733	0.910196	0.908517	2745	-0.840001	(-0.9945974,-0.6854052)	5.83036e-26	1.35209e-24	1.67215e-24	2539	-0.234157	(-0.3052208,-0.1630923)	1.29969e-10	8.52457e-10	8.96036e-10	1964	-0.545393	(-0.6155709,-0.4752149)	3.0705e-50	5.75128e-49	6.20155e-49	2537
NA	NA	QI9376	mz631_3092_rt8_09	HILIC	FALSE	631.309	8.09	TRUE	0.684852	(0.6269149,0.7481428)	0	0	0	2749	-0.0231755	(-0.0284729,-0.0178781)	1.58358e-17	2.23537e-16	2.3172e-16	2745	-0.755245	(-0.9124580,-0.5980314)	9.79792e-21	1.83523e-19	2.12882e-19	2539	-0.330157	(-0.4021433,-0.2581698)	5.4522e-19	7.42719e-18	8.49832e-18	1964	-0.549968	(-0.6210443,-0.4788919)	7.77017e-50	1.40151e-48	1.48566e-48	2537
Valine	HMDB0000883	TF32	valine	HILIC	TRUE	118.087	7.61	TRUE	1.63746	(1.4849320,1.8056656)	0	0	0	2749	0.0303974	(0.0253473,0.0354475)	2.15146e-31	1.23266e-29	1.23408e-29	2745	1.22269	(1.0774156,1.3679635)	3.36629e-58	2.62301e-56	2.54066e-56	2539	0.559269	(0.4909775,0.6275598)	1.25909e-54	4.08785e-52	3.61107e-52	1964	0.510024	(0.4419274,0.5781215)	6.3377e-47	1.0643e-45	1.13603e-45	2537
PC(O-32:0)	NA	QI6109	mz720_5887_rt6_88	HILIC	FALSE	720.589	6.88	TRUE	0.672399	(0.6139833,0.7363730)	0	0	0	2749	-0.0080311	(-0.0133558,-0.0027064)	0.00312845	0.0081692	0.00798256	2745	-0.695766	(-0.8517267,-0.5398059)	3.88608e-18	6.15454e-17	7.05397e-17	2539	-0.315625	(-0.3904440,-0.2408052)	2.37951e-16	2.53294e-15	2.75179e-15	1964	-0.506052	(-0.5768443,-0.4352600)	4.75756e-43	7.24041e-42	7.93295e-42	2537
Uric acid	NA	NA	uric_acid	AMIDE	TRUE	NA	NA	TRUE	1.63797	(1.4825234,1.8097098)	0	0	0	2749	0.03747	(0.0325530,0.0423869)	1.35482e-48	2.63919e-46	2.77545e-46	2745	0.931024	(0.7848435,1.0772042)	8.86282e-35	3.38525e-33	3.97165e-33	2539	0.451228	(0.3843171,0.5181399)	2.60266e-38	1.2675e-36	1.69646e-36	1964	0.477432	(0.4100742,0.5447906)	2.22894e-42	3.26464e-41	3.63216e-41	2537
Valine	HMDB0000883	QI9685	mz440_1716_rt7_62	HILIC	FALSE	440.172	7.62	TRUE	1.63023	(1.4715589,1.8060042)	0	0	0	2749	0.0295812	(0.0245821,0.0345802)	2.0228e-30	1.01036e-28	1.03596e-28	2745	1.13262	(0.9882622,1.2769794)	3.93367e-51	2.83807e-49	2.82044e-49	2539	0.561169	(0.4927808,0.6295565)	8.00424e-55	3.11845e-52	2.86952e-52	1964	0.472464	(0.4049264,0.5400024)	2.31261e-41	3.24098e-40	3.5659e-40	2537
NA	NA	QI10969	mz170_0925_rt6	HILIC	FALSE	170.093	6	TRUE	1.66673	(1.5101485,1.8395435)	0	0	0	2749	0.0398158	(0.0347131,0.0449185)	9.02199e-51	2.82207e-48	2.42368e-48	2745	0.631386	(0.4770872,0.7856837)	1.54989e-15	2.03999e-14	2.31515e-14	2539	0.550663	(0.4789534,0.6223736)	1.3967e-48	2.26731e-46	2.50358e-46	1964	0.485723	(0.4157372,0.5557078)	9.23245e-41	1.25768e-39	1.39361e-39	2537
NA	NA	QI4319	mz257_0742_rt5_27	HILIC	FALSE	257.074	5.27	TRUE	1.55126	(1.4041117,1.7138205)	0	0	0	2749	0.019979	(0.0151525,0.0248055)	7.15758e-16	8.29938e-15	9.24682e-15	2745	0.876218	(0.7356538,1.0167825)	1.99704e-33	7.20414e-32	8.42281e-32	2539	0.545721	(0.4801804,0.6112625)	2.67909e-56	1.30472e-53	1.28061e-53	1964	0.40626	(0.3410391,0.4714804)	2.21953e-33	2.48485e-32	2.7438e-32	2537
Lactic acid	NA	NA	lactic_acid	AMIDE	TRUE	NA	NA	TRUE	1.80569	(1.6373302,1.9913573)	0	0	0	2749	0.0157195	(0.0104000,0.0210389)	7.63757e-09	4.2876e-08	4.48864e-08	2745	1.0569	(0.9027333,1.2110697)	7.5974e-40	4.11104e-38	4.35787e-38	2539	0.206194	(0.1311571,0.2812312)	7.93462e-08	3.87384e-07	4.02058e-07	1964	0.441323	(0.3691798,0.5134660)	2.76618e-32	2.99362e-31	3.33336e-31	2537
NA	NA	QI11391	mz330_1393_rt5_7	HILIC	FALSE	330.139	5.7	TRUE	3.8168	(3.3083237,4.4034252)	0	0	0	2749	0.022245	(0.0174081,0.0270819)	3.51652e-19	5.95668e-18	6.22554e-18	2745	1.65778	(1.5352698,1.7802979)	4.2341e-137	5.49868e-135	5.05975e-135	2539	0.184528	(0.1291115,0.2399442)	8.33357e-11	5.65637e-10	5.97517e-10	1964	0.37363	(0.3109663,0.4362943)	8.55976e-31	8.59506e-30	9.66511e-30	2537
NA	NA	QI11989	mz301_1391_rt5_14	HILIC	FALSE	301.139	5.14	TRUE	1.66826	(1.5179417,1.8334554)	0	0	0	2749	0.0269621	(0.0218423,0.0320819)	1.50196e-24	4.95901e-23	5.12812e-23	2745	0.841529	(0.6934309,0.9896265)	3.4861e-28	9.70132e-27	1.19025e-26	2539	0.241217	(0.1715500,0.3108835)	1.47713e-11	1.0777e-10	1.1512e-10	1964	0.404913	(0.3362572,0.4735685)	3.50893e-30	3.45222e-29	3.84107e-29	2537
NA	NA	QI4378	mz233_063_rt5_31	HILIC	FALSE	233.063	5.31	TRUE	2.00462	(1.8113462,2.2185128)	0	0	0	2749	0.0178801	(0.0128606,0.0228997)	3.57045e-12	2.83887e-11	3.12197e-11	2745	1.02642	(0.8884191,1.1644167)	2.50354e-46	1.57319e-44	1.63185e-44	2539	0.332566	(0.2674768,0.3976543)	4.40881e-23	7.87923e-22	9.16266e-22	1964	0.378065	(0.3129212,0.4432084)	2.66914e-29	2.48779e-28	2.79383e-28	2537
CAR(3:0)	HMDB0000824	QI7088	c3_carnitine	HILIC	TRUE	218.139	8.54	TRUE	1.62833	(1.4755384,1.7969492)	0	0	0	2749	0.0239245	(0.0189500,0.0288990)	8.40952e-21	1.67161e-19	1.74772e-19	2745	0.725206	(0.5794017,0.8710108)	4.35079e-22	8.64831e-21	1.03984e-20	2539	0.512927	(0.4457876,0.5800672)	3.9654e-48	5.942e-46	6.3182e-46	1964	0.388261	(0.3209785,0.4555424)	5.38633e-29	4.97278e-28	5.5971e-28	2537
NA	NA	QI3948	mz204_0865_rt4_89	HILIC	FALSE	204.087	4.89	TRUE	3.02922	(2.6991294,3.3996735)	0	0	0	2749	0.0215738	(0.0162602,0.0268873)	2.47182e-15	2.70512e-14	3.02956e-14	2745	2.81274	(2.7054326,2.9200381)	0	0	0	2539	0.281493	(0.2252834,0.3377028)	2.94537e-22	5.03297e-21	5.8662e-21	1964	0.400666	(0.3312271,0.4701055)	5.4581e-29	5.01527e-28	5.63087e-28	2537
NA	NA	QI6556	mz162_0759_rt7_69	HILIC	FALSE	162.076	7.69	TRUE	2.16447	(1.9427265,2.4115216)	0	0	0	2749	0.0298813	(0.0247737,0.0349889)	8.67806e-30	4.12314e-28	4.29115e-28	2745	1.32981	(1.1863600,1.4732653)	1.6745e-69	1.48269e-67	1.41249e-67	2539	0.471187	(0.4024859,0.5398885)	1.6332e-39	9.64083e-38	1.23264e-37	1964	0.3956	(0.3265308,0.4646690)	1.34255e-28	1.2221e-27	1.3654e-27	2537
NA	NA	QI13606	mz782_6493_rt2_87	HILIC	FALSE	782.649	2.87	TRUE	0.627196	(0.5731512,0.6863366)	0	0	0	2749	-0.0080733	(-0.0133582,-0.0027885)	0.00276521	0.00731879	0.00717054	2745	-0.583692	(-0.7387299,-0.4286547)	2.09606e-13	2.33321e-12	2.6137e-12	2539	-0.264405	(-0.3367824,-0.1920280)	1.10065e-12	8.82332e-12	9.50802e-12	1964	-0.403536	(-0.4746313,-0.3324410)	3.97878e-28	3.58827e-27	3.98991e-27	2537
NA	NA	QI12155	mz85_0285_rt4_96	HILIC	FALSE	85.0285	4.96	TRUE	4.29133	(3.7282511,4.9394430)	0	0	0	2749	0.0238657	(0.0185817,0.0291497)	1.45515e-18	2.34267e-17	2.42638e-17	2745	3.23164	(3.1516656,3.3116160)	0	0	0	2539	0.293938	(0.2501257,0.3377510)	5.96146e-38	2.76498e-36	3.56197e-36	1964	0.383137	(0.3155870,0.4506878)	4.33864e-28	3.89478e-27	4.32056e-27	2537
Asparagine	HMDB0000168	QI6807	asparagine	HILIC	TRUE	133.061	8.08	TRUE	0.653281	(0.5947152,0.7176132)	0	0	0	2749	-0.0336347	(-0.0387772,-0.0284922)	1.31442e-36	1.16386e-34	1.10875e-34	2745	-0.752574	(-0.9042459,-0.6009025)	5.4351e-22	1.06945e-20	1.27769e-20	2539	-0.386931	(-0.4588432,-0.3150197)	2.33888e-25	4.84696e-24	5.78268e-24	1964	-0.39128	(-0.4614628,-0.3210979)	3.24111e-27	2.79366e-26	3.0985e-26	2537
NA	NA	QI9295	mz207_0142_rt8_21	HILIC	FALSE	207.014	8.21	TRUE	0.660048	(0.6025887,0.7229850)	0	0	0	2749	-0.0169516	(-0.0222978,-0.0116054)	5.8272e-10	3.64996e-09	3.86861e-09	2745	-0.800592	(-0.9579980,-0.6431867)	5.25549e-23	1.10083e-21	1.34578e-21	2539	-0.139963	(-0.2168310,-0.0630942)	0.0003643	0.00111933	0.0011115	1964	-0.390307	(-0.4632678,-0.3173457)	3.13872e-25	2.45551e-24	2.74447e-24	2537
Glucose	NA	NA	glucose_fructose_galactose	AMIDE	TRUE	NA	NA	TRUE	4.10742	(3.5763199,4.7173832)	0	0	0	2749	0.0216282	(0.0163249,0.0269314)	1.8653e-15	2.06455e-14	2.3059e-14	2745	3.36535	(3.2949772,3.4357285)	0	0	0	2539	0.25214	(0.2153143,0.2889654)	2.16518e-39	1.24052e-37	1.55243e-37	1964	0.35323	(0.2855690,0.4208906)	3.96526e-24	2.97089e-23	3.30592e-23	2537
NA	NA	QI15539	mz466_3885_rt1_83	HILIC	FALSE	466.389	1.83	TRUE	0.645205	(0.5896609,0.7059813)	0	0	0	2749	-0.0137553	(-0.0189751,-0.0085355)	2.54668e-07	1.18683e-06	1.23795e-06	2745	-0.574156	(-0.7227927,-0.4255187)	5.01698e-14	6.03276e-13	6.66143e-13	2539	-0.0955052	(-0.1623352,-0.0286752)	0.00511803	0.0131011	0.0128309	1964	-0.356019	(-0.4244394,-0.2875977)	5.54251e-24	4.10525e-23	4.56779e-23	2537
NA	NA	QI12466	mz97_0286_rt4_7	HILIC	FALSE	97.0286	4.7	TRUE	3.49707	(3.0781734,3.9729618)	0	0	0	2749	0.0196201	(0.0143504,0.0248899)	3.73972e-13	3.31135e-12	3.62349e-12	2745	2.81448	(2.7106908,2.9182662)	0	0	0	2539	0.232195	(0.1789000,0.2854901)	2.55493e-17	2.99819e-16	3.3307e-16	1964	0.353101	(0.2844387,0.4217631)	1.79079e-23	1.30166e-22	1.44269e-22	2537
CAR(4:0)	HMDB0002013	QI6911	c4_carnitine	HILIC	TRUE	232.154	8.22	TRUE	1.67303	(1.5194272,1.8421554)	0	0	0	2749	0.0225416	(0.0175450,0.0275382)	1.5915e-18	2.52052e-17	2.59342e-17	2745	0.549966	(0.4039001,0.6960315)	2.08549e-13	2.33321e-12	2.6137e-12	2539	0.393063	(0.3260912,0.4600342)	1.03144e-29	2.82992e-28	3.43973e-28	1964	0.34573	(0.2784654,0.4129937)	1.88617e-23	1.3659e-22	1.51104e-22	2537
PC(O-30:0)	NA	QI10058	mz692_5569_rt6_91	HILIC	FALSE	692.557	6.91	TRUE	0.569065	(0.5178053,0.6253989)	0	0	0	2749	-0.0137188	(-0.0189874,-0.0084503)	3.51841e-07	1.61648e-06	1.6818e-06	2745	-0.790362	(-0.9433251,-0.6373997)	1.11818e-23	2.42024e-22	3.02542e-22	2539	-0.282706	(-0.3551316,-0.2102803)	3.00892e-14	2.72622e-13	2.95534e-13	1964	-0.364033	(-0.4350666,-0.2929989)	2.51884e-23	1.8173e-22	2.00668e-22	2537
GlcCer(d18:2_22:0)	NA	QI14618	mz782_6491_rt2_1	HILIC	FALSE	782.649	2.1	TRUE	0.666817	(0.6094100,0.7296323)	0	0	0	2749	-0.0075124	(-0.0127592,-0.0022656)	0.00502773	0.0123662	0.0120163	2745	-0.541876	(-0.6971762,-0.3865763)	9.7556e-12	9.5497e-11	1.07612e-10	2539	-0.218442	(-0.2904519,-0.1464325)	3.18279e-09	1.87313e-08	1.95885e-08	1964	-0.35485	(-0.4263818,-0.2833191)	5.55041e-22	3.80711e-21	4.1891e-21	2537
Glutamine	HMDB0000641	QI6900	glutamine	HILIC	TRUE	147.076	8.21	TRUE	0.57014	(0.5188751,0.6264695)	0	0	0	2749	-0.0220235	(-0.0272720,-0.0167750)	2.90747e-16	3.49614e-15	3.86047e-15	2745	-1.01399	(-1.1670297,-0.8609518)	2.06163e-37	9.56204e-36	1.05585e-35	2539	-0.243684	(-0.3169676,-0.1704006)	8.84141e-11	5.93899e-10	6.27653e-10	1964	-0.35719	(-0.4292547,-0.2851256)	6.00449e-22	4.10412e-21	4.50808e-21	2537
Gluconic acid	NA	NA	d_gluconic_acid	AMIDE	TRUE	NA	NA	TRUE	2.70125	(2.4035995,3.0357538)	0	0	0	2749	0.022144	(0.0171810,0.0271070)	3.6913e-18	5.53127e-17	5.81684e-17	2745	1.48461	(1.3554813,1.6137417)	1.0045e-102	1.02988e-100	1.0289e-100	2539	0.15592	(0.0975027,0.2143382)	1.83161e-07	8.53583e-07	8.84353e-07	1964	0.319634	(0.2551310,0.3841361)	6.13608e-22	4.1794e-21	4.58288e-21	2537
Hexoses	NA	QI12196	mz198_0973_rt4_92	HILIC	FALSE	198.097	4.92	TRUE	4.15996	(3.6079287,4.7964601)	0	0	0	2749	0.0247115	(0.0194904,0.0299327)	3.32301e-20	6.16497e-19	6.43945e-19	2745	3.03908	(2.9493707,3.1287892)	0	0	0	2539	0.299812	(0.2517255,0.3478976)	3.4656e-33	1.27377e-31	1.55302e-31	1964	0.326047	(0.2583296,0.3937642)	8.05514e-21	5.19583e-20	5.71835e-20	2537
NA	NA	QI14931	mz581_2392_rt2_03	HILIC	FALSE	581.239	2.03	TRUE	0.625159	(0.5698680,0.6858153)	0	0	0	2749	-0.0193562	(-0.0245957,-0.0141167)	5.64143e-13	4.86261e-12	5.32224e-12	2745	-0.295048	(-0.4471368,-0.1429583)	0.0001457	0.000510474	0.000532994	2539	-0.313982	(-0.3857471,-0.2422168)	1.89089e-17	2.24601e-16	2.51068e-16	1964	-0.322076	(-0.3917440,-0.2524072)	2.42695e-19	1.46368e-18	1.61123e-18	2537
NA	NA	QI11620	mz244_0789_rt5_49	HILIC	FALSE	244.079	5.49	TRUE	2.39416	(2.1414382,2.6766988)	0	0	0	2749	0.0269723	(0.0217966,0.0321480)	4.40226e-24	1.29933e-22	1.37236e-22	2745	1.71577	(1.5795816,1.8519661)	6.6003e-121	7.14299e-119	7.28064e-119	2539	0.333251	(0.2691007,0.3974011)	8.68528e-24	1.62682e-22	1.91611e-22	1964	0.319089	(0.2497394,0.3884384)	3.54598e-19	2.12541e-18	2.33254e-18	2537
NA	NA	QI9315	mz168_0056_rt8_17	HILIC	FALSE	168.006	8.17	TRUE	0.635145	(0.5791295,0.6965785)	0	0	0	2749	-0.0170274	(-0.0222840,-0.0117708)	2.48683e-10	1.61478e-09	1.72276e-09	2745	-0.844185	(-0.9986746,-0.6896950)	3.12642e-26	7.42715e-25	9.14956e-25	2539	-0.177973	(-0.2532103,-0.1027347)	3.73085e-06	1.47717e-05	1.50282e-05	1964	-0.329373	(-0.4016946,-0.2570508)	7.97081e-19	4.73388e-18	5.17201e-18	2537
NA	NA	QI7136	mz276_1187_rt8_64	HILIC	FALSE	276.119	8.64	TRUE	0.58464	(0.5320759,0.6423972)	0	0	0	2749	-0.0233708	(-0.0285486,-0.0181930)	1.53129e-18	2.44504e-17	2.52399e-17	2745	-0.85468	(-1.0073645,-0.7019946)	2.03418e-27	5.35484e-26	6.48225e-26	2539	-0.290332	(-0.3622114,-0.2184529)	3.89849e-15	3.85495e-14	4.23518e-14	1964	-0.317056	(-0.3886374,-0.2454737)	6.6459e-18	3.83024e-17	4.14357e-17	2537
NA	NA	QI6650	mz195_9773_rt7_78	HILIC	FALSE	195.977	7.78	TRUE	0.665142	(0.6062931,0.7297041)	0	0	0	2749	-0.0093325	(-0.0146033,-0.0040617)	0.000524846	0.00159252	0.00158448	2745	-0.637578	(-0.7914818,-0.4836747)	7.00121e-16	9.60448e-15	1.10327e-14	2539	-0.125771	(-0.2006241,-0.0509187)	0.00100082	0.00292732	0.00291702	1964	-0.31156	(-0.3829340,-0.2401860)	1.93099e-17	1.08716e-16	1.17332e-16	2537
Hexoses	NA	QI12184	mz163_06_rt4_93	HILIC	FALSE	163.06	4.93	TRUE	3.61355	(3.1775200,4.1094066)	0	0	0	2749	0.0334286	(0.0282338,0.0386235)	1.60532e-35	1.20276e-33	1.21159e-33	2745	2.90713	(2.8062642,3.0079930)	0	0	0	2539	0.378961	(0.3269446,0.4309776)	3.95917e-44	3.85623e-42	4.73121e-42	1964	0.300253	(0.2308917,0.3696151)	3.51434e-17	1.93936e-16	2.09111e-16	2537
Salicyluric acid	NA	NA	__hydroxybutyric_acid	AMIDE	TRUE	NA	NA	TRUE	1.66729	(1.5178628,1.8314230)	0	0	0	2749	0.0181633	(0.0128458,0.0234807)	2.55776e-11	1.83181e-10	2.02642e-10	2745	1.34922	(1.1996422,1.4987937)	4.15742e-66	3.52115e-64	3.31208e-64	2539	0.118327	(0.0443559,0.1922982)	0.00173123	0.00482458	0.00477178	1964	0.313186	(0.2406181,0.3857546)	4.35254e-17	2.375e-16	2.54757e-16	2537
Pyruvic acid	NA	NA	pyruvic_acid	AMIDE	TRUE	NA	NA	TRUE	1.91494	(1.7244298,2.1264926)	0	0	0	2749	0.0215119	(0.0161999,0.0268238)	2.90395e-15	3.0912e-14	3.47022e-14	2745	0.996347	(0.8418856,1.1508089)	1.32397e-35	5.26346e-34	6.12443e-34	2539	0.248584	(0.1734606,0.3237076)	1.08762e-10	7.20641e-10	7.60803e-10	1964	0.315607	(0.2424665,0.3887471)	4.39982e-17	2.39409e-16	2.56477e-16	2537
NA	NA	QI9330	mz106_0865_rt8_15	HILIC	FALSE	106.087	8.15	TRUE	1.60979	(1.4564263,1.7792995)	0	0	0	2749	0.0181645	(0.0132923,0.0230367)	3.47878e-13	3.09437e-12	3.39359e-12	2745	0.25539	(0.1170461,0.3937330)	0.000300457	0.000967422	0.00101617	2539	0.119775	(0.0568074,0.1827425)	0.000196546	0.000631801	0.000631944	1964	0.270294	(0.2066829,0.3339046)	1.28333e-16	6.77487e-16	7.27389e-16	2537
NA	NA	QI4288	mz263_0735_rt5_24	HILIC	FALSE	263.074	5.24	TRUE	2.15983	(1.9436145,2.4001081)	0	0	0	2749	0.0239653	(0.0189230,0.0290075)	2.32812e-20	4.40309e-19	4.57332e-19	2745	1.4369	(1.2979534,1.5758461)	7.55176e-85	7.35541e-83	7.21948e-83	2539	0.237273	(0.1712001,0.3033458)	2.59884e-12	2.03315e-11	2.17938e-11	1964	0.289328	(0.2205767,0.3580802)	2.47331e-16	1.28824e-15	1.38544e-15	2537
NA	NA	QI15791	mz500_4317_rt1_76	HILIC	FALSE	500.432	1.76	TRUE	0.683814	(0.6253934,0.7476909)	0	0	0	2749	-0.0066752	(-0.0119047,-0.0014457)	0.0123756	0.0276147	0.0269705	2745	-0.43731	(-0.5833554,-0.2912648)	4.88008e-09	3.71344e-08	4.11649e-08	2539	-0.0627391	(-0.1290299,0.0035517)	0.0635892	0.124369	0.120141	1964	-0.28083	(-0.3482733,-0.2133869)	5.00811e-16	2.57409e-15	2.77283e-15	2537
NA	NA	QI1071	mz659_2705_rt1_97	HILIC	FALSE	659.27	1.97	TRUE	0.67143	(0.6143507,0.7338133)	0	0	0	2749	-0.0236528	(-0.0288596,-0.0184460)	9.31257e-19	1.53736e-17	1.58979e-17	2745	-0.330807	(-0.4819062,-0.1797074)	1.82849e-05	7.74326e-05	8.11782e-05	2539	-0.308803	(-0.3787069,-0.2388987)	9.3941e-18	1.15821e-16	1.30788e-16	1964	-0.289197	(-0.3587394,-0.2196549)	5.45177e-16	2.79475e-15	3.00686e-15	2537
CAR(5:0)	HMDB0000688	QI9447	c5_carnitine	HILIC	TRUE	246.17	7.98	TRUE	1.63475	(1.4807957,1.8047152)	0	0	0	2749	0.0309517	(0.0260414,0.0358621)	3.45203e-34	2.40163e-32	2.35724e-32	2745	0.729973	(0.5838166,0.8761291)	2.96e-22	6.00633e-21	7.31834e-21	2539	0.382304	(0.3116621,0.4529460)	1.26041e-25	2.69811e-24	3.22755e-24	1964	0.279323	(0.2111035,0.3475424)	1.49121e-15	7.29869e-15	7.86175e-15	2537
NA	NA	QI11630	mz205_0682_rt5_48	HILIC	FALSE	205.068	5.48	TRUE	1.89217	(1.7209320,2.0804396)	0	0	0	2749	0.013273	(0.0080122,0.0185337)	7.98499e-07	3.51918e-06	3.63507e-06	2745	1.1084	(0.9655070,1.2512985)	4.59875e-50	3.19942e-48	3.14029e-48	2539	0.175505	(0.1089346,0.2420743)	2.57353e-07	1.17406e-06	1.20998e-06	1964	0.272049	(0.2035008,0.3405967)	1.02922e-14	4.72859e-14	5.07183e-14	2537
N-AcetylGlucosamine	HMDB0000212*	QI4708	mz204_0867_rt5_62	HILIC	FALSE	204.087	5.62	TRUE	1.57471	(1.4342799,1.7288888)	0	0	0	2749	0.0257426	(0.0206773,0.0308079)	5.30124e-23	1.34732e-21	1.41426e-21	2745	0.727287	(0.5791449,0.8754291)	1.43435e-21	2.79411e-20	3.31751e-20	2539	0.216292	(0.1452601,0.2873240)	2.77975e-09	1.6509e-08	1.73311e-08	1964	0.274195	(0.2048585,0.3435326)	1.27574e-14	5.76599e-14	6.13896e-14	2537
NA	NA	QI443	mz469_3887_rt1_78	HILIC	FALSE	469.389	1.78	TRUE	0.652199	(0.5971215,0.7123560)	0	0	0	2749	-0.0166369	(-0.0218728,-0.0114009)	5.36871e-10	3.37363e-09	3.5808e-09	2745	-0.426151	(-0.5764960,-0.2758058)	3.01151e-08	2.00219e-07	2.22603e-07	2539	-0.100191	(-0.1694362,-0.0309450)	0.00459218	0.0118484	0.0116141	1964	-0.27103	(-0.3405457,-0.2015136)	2.94193e-14	1.27353e-13	1.37867e-13	2537
NA	NA	QI8919	mz262_1646_rt8_93	HILIC	FALSE	262.165	8.93	TRUE	1.62584	(1.4742323,1.7930306)	0	0	0	2749	0.0172922	(0.0122816,0.0223029)	1.60154e-11	1.18624e-10	1.31989e-10	2745	0.63655	(0.4891046,0.7839946)	4.24892e-17	6.17679e-16	7.25351e-16	2539	0.194697	(0.1220730,0.2673213)	1.61786e-07	7.63097e-07	7.89119e-07	1964	0.263886	(0.1952176,0.3325550)	6.72905e-14	2.80689e-13	3.06332e-13	2537
NA	NA	QI4039	mz410_0508_rt4_96	HILIC	FALSE	410.051	4.96	TRUE	2.61587	(2.3332378,2.9327409)	0	0	0	2749	0.0142438	(0.0090092,0.0194783)	1.02981e-07	4.97784e-07	5.23669e-07	2745	2.30113	(2.1791631,2.4230888)	5.9955e-240	8.98403e-238	8.59755e-238	2539	0.183641	(0.1208480,0.2464334)	1.12331e-08	6.18138e-08	6.44331e-08	1964	0.255283	(0.1856466,0.3249198)	8.58036e-13	3.30981e-12	3.58724e-12	2537
NA	NA	QI7106	mz160_1331_rt8_59	HILIC	FALSE	160.133	8.59	TRUE	1.84435	(1.6725875,2.0337623)	0	0	0	2749	0.0119715	(0.0067431,0.0171999)	7.4267e-06	2.87048e-05	2.90188e-05	2745	0.524555	(0.3710487,0.6780624)	2.54711e-11	2.39699e-10	2.64678e-10	2539	0.147153	(0.0768523,0.2174534)	4.20686e-05	0.000148459	0.000149323	1964	0.255769	(0.1845500,0.3269890)	2.42887e-12	9.11645e-12	9.92308e-12	2537
1,5-Anhydrosorbitol	NA	NA	1,5-ag/1-deoxyglucose	AMIDE	TRUE	NA	NA	TRUE	0.228853	(0.1977328,0.2648723)	0	0	0	2749	-0.0061634	(-0.0114924,-0.0008344)	0.0234148	0.0487829	0.047492	2745	-2.5	(-2.6175634,-2.3824289)	8.3524e-290	1.47913e-287	1.49717e-287	2539	0.0334761	(-0.0069514,0.0739035)	0.104546	0.188956	0.184402	1964	-0.241048	(-0.3113235,-0.1707723)	2.14868e-11	7.6241e-11	8.35015e-11	2537
NA	NA	QI5762	mz244_0791_rt6_34	HILIC	FALSE	244.079	6.34	TRUE	1.55938	(1.4174223,1.7155623)	0	0	0	2749	0.009063	(0.0039747,0.0141513)	0.000486035	0.00148634	0.00147978	2745	0.497167	(0.3537875,0.6405458)	1.30542e-11	1.26515e-10	1.41816e-10	2539	0.0513779	(-0.0141990,0.1169548)	0.124569	0.217633	0.213419	1964	0.221294	(0.1546224,0.2879658)	9.11598e-11	3.08297e-10	3.40425e-10	2537
NA	NA	QI4001	mz162_0759_rt4_93	HILIC	FALSE	162.076	4.93	TRUE	2.54089	(2.2776689,2.8345331)	0	0	0	2749	0.015221	(0.0099333,0.0205087)	1.82753e-08	9.7803e-08	1.02772e-07	2745	2.23671	(2.1093415,2.3640829)	1.6992e-213	2.36432e-211	2.21514e-211	2539	0.120912	(0.0583466,0.1834780)	0.000155139	0.000507065	0.000506764	1964	0.229021	(0.1578564,0.3001860)	3.27202e-10	1.0597e-09	1.16241e-09	2537
NA	NA	QI3529	mz260_0795_rt4_45	HILIC	FALSE	260.079	4.45	TRUE	0.187033	(0.1536352,0.2276909)	0	0	0	2749	-0.0078821	(-0.0132597,-0.0025046)	0.00408343	0.0102639	0.0100268	2745	-2.56457	(-2.6797584,-2.4493863)	0	0	0	2539	0.0421863	(0.0082574,0.0761151)	0.0148376	0.0342055	0.0331419	1964	-0.226063	(-0.2963414,-0.1557839)	3.33471e-10	1.07728e-09	1.18073e-09	2537
NA	NA	QI427	mz427_3416_rt1_77	HILIC	FALSE	427.342	1.77	TRUE	0.693695	(0.6366353,0.7558692)	0	0	0	2749	-0.0012391	(-0.0065488,0.0040706)	0.647287	0.746317	0.744167	2745	-0.311863	(-0.4613020,-0.1624236)	4.40693e-05	0.000171147	0.000178661	2539	0.0142782	(-0.0500316,0.0785880)	0.663303	0.762624	0.762475	1964	-0.215969	(-0.2851102,-0.1468277)	1.04788e-09	3.22986e-09	3.51911e-09	2537
NA	NA	QI9734	mz310_2008_rt7_53	HILIC	FALSE	310.201	7.53	TRUE	1.56475	(1.4215142,1.7224140)	0	0	0	2749	0.0159488	(0.0108018,0.0210958)	1.40391e-09	8.36335e-09	8.82986e-09	2745	0.500292	(0.3487599,0.6518247)	1.14199e-10	1.0347e-09	1.12939e-09	2539	0.195507	(0.1235544,0.2674591)	1.10221e-07	5.3278e-07	5.50721e-07	1964	0.212031	(0.1415142,0.2825470)	4.21771e-09	1.23736e-08	1.36221e-08	2537
CAR(8:0(OH))	NA	QI9448	mz304_2114_rt7_98	HILIC	FALSE	304.211	7.98	TRUE	0.657045	(0.5984361,0.7213928)	0	0	0	2749	-0.0148854	(-0.0200141,-0.0097567)	1.39652e-08	7.57777e-08	7.91545e-08	2745	-0.362416	(-0.5088021,-0.2160296)	1.27899e-06	6.99852e-06	7.61026e-06	2539	-0.163959	(-0.2343274,-0.0935905)	5.19231e-06	2.03513e-05	2.06827e-05	1964	-0.19494	(-0.2627694,-0.1271109)	1.93749e-08	5.29345e-08	5.88636e-08	2537
NA	NA	QI5169	mz246_0946_rt5_96	HILIC	FALSE	246.095	5.96	TRUE	1.58909	(1.4469371,1.7452065)	0	0	0	2749	0.008141	(0.0030132,0.0132689)	0.00187092	0.00510441	0.00501477	2745	0.685789	(0.5380005,0.8335770)	1.79153e-19	3.14405e-18	3.56813e-18	2539	0.0756209	(0.0068685,0.1443732)	0.031119	0.0663236	0.0637495	1964	0.190276	(0.1209316,0.2596212)	8.10664e-08	2.10276e-07	2.32498e-07	2537
CAR(5:1)	HMDB0002366	QI6783	c5_1_carnitine	HILIC	TRUE	244.154	8.05	TRUE	1.55167	(1.4060995,1.7123023)	0	0	0	2749	0.0128194	(0.0077132,0.0179256)	9.03798e-07	3.97426e-06	4.10141e-06	2745	0.621731	(0.4729014,0.7705602)	4.04051e-16	5.58221e-15	6.43788e-15	2539	0.142946	(0.0695224,0.2163688)	0.000138632	0.000456174	0.000454916	1964	0.190887	(0.1212371,0.2605362)	8.39488e-08	2.16886e-07	2.39329e-07	2537
NA	NA	QI13939	mz299_1388_rt2_52	HILIC	FALSE	299.139	2.52	TRUE	0.662233	(0.6020018,0.7284909)	0	0	0	2749	-0.0158791	(-0.0209886,-0.0107697)	1.25704e-09	7.51139e-09	7.94095e-09	2745	-0.286282	(-0.4366723,-0.1358906)	0.000193578	0.000660403	0.000687106	2539	-0.222116	(-0.2941989,-0.1500331)	1.8043e-09	1.09155e-08	1.14485e-08	1964	-0.177356	(-0.2470562,-0.1076559)	6.45989e-07	1.55548e-06	1.69661e-06	2537
NA	NA	QI9487	mz205_9981_rt7_87	HILIC	FALSE	205.998	7.87	TRUE	0.507575	(0.4592033,0.5610424)	0	0	0	2749	-0.0141281	(-0.0194683,-0.0087879)	2.28578e-07	1.06779e-06	1.1149e-06	2745	-1.43701	(-1.5805044,-1.2935235)	4.87952e-80	4.52634e-78	4.37327e-78	2539	-0.0891303	(-0.1423569,-0.0359038)	0.00104119	0.00302722	0.00301021	1964	-0.181026	(-0.2522037,-0.1098489)	6.54126e-07	1.57313e-06	1.71484e-06	2537
CAR(10:0(OH))	NA	QI6570	mz332_2427_rt7_71	HILIC	FALSE	332.243	7.71	TRUE	0.626596	(0.5717411,0.6867146)	0	0	0	2749	-0.0125751	(-0.0177762,-0.0073740)	2.23718e-06	9.21359e-06	9.40797e-06	2745	-0.433961	(-0.5798226,-0.2880986)	6.10186e-09	4.5717e-08	5.08725e-08	2539	-0.158868	(-0.2284311,-0.0893053)	7.93336e-06	3.0243e-05	3.06643e-05	1964	-0.164465	(-0.2321454,-0.0967838)	1.9953e-06	4.69426e-06	5.11853e-06	2537
Biliverdin	HMDB0001008	QI14673	biliverdin	HILIC	TRUE	583.255	2.1	TRUE	0.654166	(0.5952735,0.7188858)	0	0	0	2749	-0.0091063	(-0.0143018,-0.0039108)	0.000597348	0.00177654	0.00175532	2745	-0.233653	(-0.3849538,-0.0823512)	0.00248503	0.00653285	0.00690607	2539	-0.192395	(-0.2658313,-0.1189598)	3.05087e-07	1.37891e-06	1.42972e-06	1964	-0.16011	(-0.2302347,-0.0899859)	7.8981e-06	1.77048e-05	1.91315e-05	2537
NA	NA	QI12064	mz348_0685_rt5_07	HILIC	FALSE	348.068	5.07	TRUE	1.58509	(1.4235960,1.7648982)	0	0	0	2749	0.0137663	(0.0086311,0.0189016)	1.58133e-07	7.51325e-07	7.90114e-07	2745	0.61491	(0.4634075,0.7664117)	2.59554e-15	3.32639e-14	3.7596e-14	2539	0.235607	(0.1610674,0.3101462)	6.91208e-10	4.38591e-09	4.56771e-09	1964	0.158614	(0.0876120,0.2296157)	1.23206e-05	2.70581e-05	2.91547e-05	2537
NA	NA	QI4027	mz203_0526_rt4_95	HILIC	FALSE	203.053	4.95	TRUE	2.853	(2.5357474,3.2099355)	0	0	0	2749	0.0177672	(0.0125672,0.0229672)	2.52446e-11	1.81463e-10	2.01115e-10	2745	2.32344	(2.2025500,2.4443322)	3.5907e-247	5.8289e-245	5.72118e-245	2539	0.206616	(0.1450613,0.2681710)	5.90547e-11	4.07938e-10	4.32063e-10	1964	0.153915	(0.0840554,0.2237749)	1.61853e-05	3.51493e-05	3.78625e-05	2537
CAR(14:2)	HMDB0013331	QI9968	c14_2_carnitine	HILIC	TRUE	368.279	7.04	TRUE	0.677237	(0.6177763,0.7424202)	0	0	0	2749	0.0024854	(-0.0028347,0.0078054)	0.359727	0.491408	0.48482	2745	-0.331989	(-0.4849457,-0.1790322)	2.15598e-05	8.97404e-05	9.36871e-05	2539	-0.0800409	(-0.1545045,-0.0055773)	0.0351519	0.0739481	0.0710971	1964	-0.147558	(-0.2186324,-0.0764825)	4.82481e-05	0.000100093	0.000107602	2537
NA	NA	QI8712	mz143_0814_rt9_71	HILIC	FALSE	143.081	9.71	TRUE	0.490457	(0.4424571,0.5436632)	0	0	0	2749	-0.0071408	(-0.0125185,-0.0017631)	0.0092725	0.0212754	0.0207438	2745	-0.996665	(-1.1510464,-0.8422831)	1.1663e-35	4.73323e-34	5.57491e-34	2539	-0.0467635	(-0.1195429,0.0260159)	0.207773	0.328258	0.322453	1964	-0.136935	(-0.2106843,-0.0631866)	0.000277062	0.000539717	0.000579165	2537
NA	NA	QI5024	mz277_0891_rt5_85	HILIC	FALSE	277.089	5.85	TRUE	1.58088	(1.4418373,1.7333238)	0	0	0	2749	0.0079641	(0.0028058,0.0131223)	0.00248965	0.00667103	0.00655075	2745	0.539736	(0.3940162,0.6854552)	5.01253e-13	5.36506e-12	5.98997e-12	2539	0.15801	(0.0883823,0.2276378)	9.0442e-06	3.44104e-05	3.48639e-05	1964	0.1264	(0.0581347,0.1946662)	0.000288153	0.000559643	0.000600598	2537
NA	NA	QI6276	mz366_2632_rt7_11	HILIC	FALSE	366.263	7.11	TRUE	0.667139	(0.6093624,0.7303938)	0	0	0	2749	-0.00087	(-0.0061778,0.0044377)	0.747927	0.825474	0.823754	2745	-0.440028	(-0.5904738,-0.2895824)	1.08897e-08	7.74202e-08	8.62753e-08	2539	-0.0482082	(-0.1214341,0.0250177)	0.196808	0.313733	0.30844	1964	-0.116749	(-0.1868845,-0.0466135)	0.00111252	0.00201975	0.00215297	2537
N-Oleoyl glycine	HMDB0013631	QI14153	oleoyl_glycine	HILIC	TRUE	340.284	2.35	TRUE	0.652067	(0.5955743,0.7139181)	0	0	0	2749	-0.0087997	(-0.0140757,-0.0035238)	0.00108707	0.0030914	0.00306259	2745	-0.2169	(-0.3567936,-0.0770058)	0.00238765	0.00631091	0.00667425	2539	-0.164995	(-0.2288408,-0.1011486)	4.39404e-07	1.96321e-06	2.02606e-06	1964	-0.104409	(-0.1694263,-0.0393923)	0.00165759	0.00293544	0.00312761	2537
NA	NA	QI10309	mz285_0053_rt6_44	HILIC	FALSE	285.005	6.44	TRUE	0.678802	(0.6203651,0.7427432)	0	0	0	2749	-0.0017821	(-0.0071573,0.0035932)	0.515699	0.635987	0.632778	2745	-0.603396	(-0.7595109,-0.4472812)	4.85128e-14	5.86975e-13	6.50162e-13	2539	0.0903165	(0.0157500,0.1648830)	0.0176249	0.0400622	0.0387046	1964	-0.0038645	(-0.0772159,0.0694870)	0.917726	0.934517	0.939343	2537
2-Aminooctanoic acid	NA	NA	__aminoadipic_acid	AMIDE	TRUE	NA	NA	TRUE	1.4913	(1.3556456,1.6405380)	2.22045e-16	3.32726e-15	3.65991e-15	2749	0.0140496	(0.0087953,0.0193038)	1.69859e-07	8.0312e-07	8.4283e-07	2745	0.688342	(0.5346125,0.8420712)	2.94339e-18	4.7781e-17	5.48159e-17	2539	0.320824	(0.2463382,0.3953093)	5.72945e-17	6.56528e-16	7.19753e-16	1964	0.285383	(0.2137161,0.3570494)	8.40592e-15	3.88949e-14	4.18545e-14	2537
SM(d18:1_22:2)	NA	QI6302	mz783_6359_rt7_21	HILIC	FALSE	783.636	7.21	TRUE	0.656985	(0.5946865,0.7258104)	2.22045e-16	3.32726e-15	3.65991e-15	2749	0.0118427	(0.0070375,0.0166479)	1.42187e-06	6.03443e-06	6.19745e-06	2745	-0.530659	(-0.6722904,-0.3890272)	2.71929e-13	2.99276e-12	3.36161e-12	2539	-0.0751801	(-0.1434210,-0.0069392)	0.0308471	0.0658883	0.0633736	1964	-0.223786	(-0.2896458,-0.1579269)	3.2796e-11	1.14877e-10	1.25944e-10	2537
Arginine	HMDB0000517	QI8810	mz158_0923_rt9_37	HILIC	FALSE	158.092	9.37	TRUE	0.692597	(0.6342667,0.7562913)	2.22045e-16	3.32726e-15	3.65991e-15	2749	-0.0148432	(-0.0201759,-0.0095105)	5.25066e-08	2.62264e-07	2.74797e-07	2745	-0.29627	(-0.4452082,-0.1473329)	9.8421e-05	0.000357969	0.000371695	2539	-0.0525158	(-0.1242292,0.0191976)	0.151113	0.256195	0.251388	1964	-0.108936	(-0.1782004,-0.0396722)	0.00206412	0.00363225	0.00386416	2537
PE(34:2)	HMDB0008928	QI11421	c34_2_pe	HILIC	TRUE	716.522	5.68	TRUE	1.48071	(1.3466903,1.6280777)	4.44089e-16	6.45586e-15	7.07582e-15	2749	4e-07	(-0.0051927,0.0051935)	0.99989	0.99989	0.99989	2745	0.535901	(0.3837681,0.6880347)	6.2181e-12	6.18003e-11	6.91221e-11	2539	0.0473373	(-0.0271494,0.1218239)	0.212783	0.333465	0.327215	1964	1.01955	(0.9601858,1.0789146)	8.8505e-206	9.57821e-204	9.76278e-204	2537
NA	NA	QI14055	mz581_2393_rt2_49	HILIC	FALSE	581.239	2.49	TRUE	0.693307	(0.6348914,0.7570962)	4.44089e-16	6.45586e-15	7.07582e-15	2749	-0.0073114	(-0.0126138,-0.0020090)	0.00689867	0.0164286	0.0159817	2745	-0.107334	(-0.2588363,0.0441687)	0.164887	0.248607	0.253428	2539	-0.197281	(-0.2700078,-0.1245547)	1.15657e-07	5.55737e-07	5.73883e-07	1964	-0.200795	(-0.2706753,-0.1309154)	1.94952e-08	5.31142e-08	5.89791e-08	2537
NA	NA	QI12573	mz102_0664_rt4_6	HILIC	FALSE	102.066	4.6	TRUE	1.47797	(1.3448010,1.6243307)	4.44089e-16	6.45586e-15	7.07582e-15	2749	0.0097194	(0.0046817,0.0147572)	0.000158204	0.000514493	0.000510956	2745	0.393443	(0.2485910,0.5382950)	1.09143e-07	6.81444e-07	7.59762e-07	2539	0.0939988	(0.0255273,0.1624703)	0.00715581	0.0178378	0.0174621	1964	0.139753	(0.0723469,0.2071596)	4.93861e-05	0.000102345	0.000109968	2537
NA	NA	QI490	mz437_3612_rt1_79	HILIC	FALSE	437.361	1.79	TRUE	0.693079	(0.6340573,0.7575940)	6.66134e-16	9.33546e-15	1.01621e-14	2749	-0.0089018	(-0.0140574,-0.0037463)	0.000720058	0.00210612	0.00209445	2745	-0.403936	(-0.5511553,-0.2567177)	8.11801e-08	5.10125e-07	5.70648e-07	2539	-0.0358018	(-0.1029773,0.0313737)	0.296047	0.426752	0.426435	1964	-0.290064	(-0.3579097,-0.2222183)	8.4045e-17	4.48547e-16	4.82082e-16	2537
LPC(24:0)	HMDB0010405	QI9712	c24_0_lpc	HILIC	TRUE	608.464	7.58	TRUE	0.68617	(0.6262998,0.7517634)	6.66134e-16	9.33546e-15	1.01621e-14	2749	-0.0377256	(-0.0428289,-0.0326222)	6.24148e-46	9.35262e-44	9.94476e-44	2745	-0.635156	(-0.7914514,-0.4788613)	2.3995e-15	3.09551e-14	3.51111e-14	2539	-0.476125	(-0.5487093,-0.4035397)	2.03447e-36	8.61554e-35	1.12209e-34	1964	-0.246635	(-0.3195537,-0.1737156)	4.02427e-11	1.39987e-10	1.53479e-10	2537
NA	NA	QI3628	mz274_1218_rt4_6	HILIC	FALSE	274.122	4.6	TRUE	1.46963	(1.3387862,1.6132607)	6.66134e-16	9.33546e-15	1.01621e-14	2749	0.0111062	(0.0060248,0.0161877)	1.8848e-05	6.90149e-05	6.89491e-05	2745	0.42615	(0.2794340,0.5728662)	1.37117e-08	9.60805e-08	1.06862e-07	2539	0.0860136	(0.0163852,0.1556421)	0.0154964	0.0355559	0.0343991	1964	0.111595	(0.0431830,0.1800067)	0.0013977	0.00250516	0.00266923	2537
NA	NA	QI5842	mz134_0326_rt6_4	HILIC	FALSE	134.033	6.4	TRUE	1.47071	(1.3393590,1.6149448)	6.66134e-16	9.33546e-15	1.01621e-14	2749	0.0047993	(-0.0002893,0.0098880)	0.064515	0.117563	0.114782	2745	0.302064	(0.1572854,0.4468434)	4.42566e-05	0.000171395	0.000178772	2539	0.0244018	(-0.0448583,0.0936619)	0.48967	0.615415	0.618903	1964	0.109823	(0.0424341,0.1772110)	0.00141222	0.0025285	0.00269298	2537
Biliverdin	HMDB0001008	QI14569	mz301_1179_rt2_1	HILIC	FALSE	301.118	2.1	TRUE	0.675071	(0.6135270,0.7427895)	8.88178e-16	1.22707e-14	1.34068e-14	2749	-0.01072	(-0.0158585,-0.0055814)	4.42545e-05	0.000153942	0.000151458	2745	-0.339872	(-0.4913447,-0.1883994)	1.12811e-05	4.93833e-05	5.20164e-05	2539	-0.171861	(-0.2460526,-0.0976688)	5.88555e-06	2.28843e-05	2.32504e-05	1964	-0.206526	(-0.2767244,-0.1363266)	8.94588e-09	2.54403e-08	2.81943e-08	2537
NA	NA	QI9722	mz673_5256_rt7_57	HILIC	FALSE	673.526	7.57	TRUE	0.645503	(0.5799902,0.7184149)	1.11022e-15	1.52303e-14	1.65839e-14	2749	0.0230343	(0.0186322,0.0274364)	2.908e-24	9.28653e-23	9.69784e-23	2745	-0.305841	(-0.4378058,-0.1738772)	5.76216e-06	2.72444e-05	2.85915e-05	2539	0.116843	(0.0532255,0.1804612)	0.000323668	0.0010008	0.000993876	1964	0.0900727	(0.0287260,0.1514194)	0.00402149	0.00680614	0.00728133	2537
Isoleucine	HMDB0000172	TF22	isoleucine	HILIC	TRUE	132.102	7.29	TRUE	1.50088	(1.3586276,1.6580159)	1.33227e-15	1.80227e-14	1.94946e-14	2749	0.0186265	(0.0137364,0.0235167)	1.08194e-13	1.02811e-12	1.13248e-12	2745	0.939238	(0.8008555,1.0776208)	4.08224e-39	2.14924e-37	2.25151e-37	2539	0.457465	(0.3917628,0.5231667)	1.27932e-40	9.23006e-39	1.07914e-38	1964	0.448587	(0.3844826,0.5126920)	2.18853e-41	3.08932e-40	3.41125e-40	2537
Alanine	NA	QI6748	mz149_9927_rt7_99	HILIC	FALSE	149.993	7.99	TRUE	1.46362	(1.3329881,1.6070442)	1.33227e-15	1.80227e-14	1.94946e-14	2749	0.0266136	(0.0213200,0.0319072)	1.49334e-22	3.68231e-21	3.82402e-21	2745	0.86687	(0.7096124,1.0241270)	1.17487e-26	2.93416e-25	3.50992e-25	2539	0.484034	(0.4086357,0.5594323)	5.21622e-35	2.11692e-33	2.67145e-33	1964	0.333659	(0.2600906,0.4072275)	1.10229e-18	6.50685e-18	7.1202e-18	2537
Phe-Trp	NA	QI10546	mz352_1652_rt6_26	HILIC	FALSE	352.165	6.26	TRUE	0.723026	(0.6674119,0.7832735)	1.9984e-15	2.66636e-14	2.89465e-14	2749	-0.0084249	(-0.0137729,-0.0030769)	0.00202873	0.00548884	0.00538741	2745	-0.0290995	(-0.1779433,0.1197442)	0.701482	0.772629	0.783431	2539	-0.0201248	(-0.0862564,0.0460067)	0.550699	0.669639	0.672524	1964	0.141397	(0.0724108,0.2103837)	6.01163e-05	0.000124185	0.000133654	2537
NA	NA	QI2735	mz484_3272_rt3_1	HILIC	FALSE	484.327	3.1	TRUE	1.47641	(1.3407090,1.6258380)	2.44249e-15	3.21484e-14	3.50253e-14	2749	0.0176561	(0.0123687,0.0229434)	6.94599e-11	4.74598e-10	5.15051e-10	2745	0.54101	(0.3844110,0.6976095)	1.54757e-11	1.48506e-10	1.65613e-10	2539	0.322871	(0.2459026,0.3998400)	3.46244e-16	3.66567e-15	3.97211e-15	1964	0.211093	(0.1381743,0.2840116)	1.53024e-08	4.24027e-08	4.70894e-08	2537
Choline	HMDB0000097	QI9116	choline	HILIC	TRUE	104.107	8.51	TRUE	1.4578	(1.3272446,1.6011874)	3.33067e-15	4.29678e-14	4.72889e-14	2749	0.0262533	(0.0212346,0.0312720)	2.99304e-24	9.40394e-23	9.75459e-23	2745	0.349624	(0.2000414,0.4992067)	4.79949e-06	2.32572e-05	2.45802e-05	2539	0.0265137	(-0.0459006,0.0989280)	0.472804	0.600014	0.603083	1964	0.242085	(0.1728970,0.3112734)	8.56118e-12	3.09985e-11	3.37273e-11	2537
Biliverdin	HMDB0001008	QI14719	mz299_1387_rt2_09	HILIC	FALSE	299.139	2.09	TRUE	0.683186	(0.6212973,0.7512401)	3.77476e-15	4.83765e-14	5.30687e-14	2749	-0.0169455	(-0.0220026,-0.0118884)	5.98327e-11	4.14783e-10	4.51579e-10	2745	-0.357149	(-0.5063466,-0.2079522)	2.82154e-06	1.45406e-05	1.53844e-05	2539	-0.16614	(-0.2382762,-0.0940049)	6.6483e-06	2.55946e-05	2.59067e-05	1964	-0.155029	(-0.2243678,-0.0856903)	1.2115e-05	2.66366e-05	2.87156e-05	2537
NA	NA	QI14798	mz315_1336_rt2_07	HILIC	FALSE	315.134	2.07	TRUE	0.682914	(0.6208031,0.7512393)	4.44089e-15	5.61744e-14	6.18275e-14	2749	-0.0114656	(-0.0166003,-0.0063308)	1.24017e-05	4.67283e-05	4.70477e-05	2745	-0.318098	(-0.4699575,-0.1662382)	4.12705e-05	0.000162087	0.000169091	2539	-0.147088	(-0.2211749,-0.0730001)	0.000102089	0.00034053	0.000338879	1964	-0.178301	(-0.2487484,-0.1078525)	7.40412e-07	1.77407e-06	1.93397e-06	2537
1-Methyl nicotinamide	HMDB0000699	QI7065	_1_methylnicotinamide	HILIC	TRUE	137.071	8.47	TRUE	0.69133	(0.6302529,0.7583266)	5.10703e-15	6.41838e-14	7.04181e-14	2749	-0.0211323	(-0.0264603,-0.0158044)	1.04089e-14	1.0616e-13	1.18463e-13	2745	-0.46376	(-0.6197520,-0.3077680)	6.25755e-09	4.63487e-08	5.15708e-08	2539	-0.197408	(-0.2741582,-0.1206576)	4.97188e-07	2.2163e-06	2.28515e-06	1964	-0.0560426	(-0.1289561,0.0168708)	0.131888	0.174655	0.181679	2537
Niacinamide	HMDB0001406	QI12969	niacinamide	HILIC	TRUE	123.056	3.94	TRUE	0.68817	(0.6262600,0.7562001)	7.77156e-15	9.64267e-14	1.06137e-13	2749	-0.0088607	(-0.0141608,-0.0035606)	0.00105803	0.00302206	0.00299845	2745	-0.286973	(-0.4416193,-0.1323261)	0.000279406	0.000913226	0.00095767	2539	0.029035	(-0.0474539,0.1055238)	0.456689	0.58644	0.589462	1964	0.112935	(0.0410356,0.1848342)	0.00209181	0.00367103	0.00390072	2537
NA	NA	QI6122	mz398_326_rt6_89	HILIC	FALSE	398.326	6.89	TRUE	0.691455	(0.6299485,0.7589660)	8.43769e-15	1.04029e-13	1.14148e-13	2749	0.0155279	(0.0103822,0.0206736)	3.68428e-09	2.1171e-08	2.23867e-08	2745	-0.165754	(-0.3122643,-0.0192434)	0.0266122	0.0527908	0.0558739	2539	-0.0467148	(-0.1184751,0.0250455)	0.201861	0.321	0.315669	1964	-0.0715096	(-0.1396285,-0.0033908)	0.0396433	0.0579768	0.0609962	2537
NA	NA	QI1585	mz796_6645_rt2_1	HILIC	FALSE	796.664	2.1	TRUE	0.711538	(0.6528930,0.7754499)	8.88178e-15	1.08816e-13	1.19032e-13	2749	-0.0082671	(-0.0135103,-0.0030240)	0.00200994	0.00546076	0.00535735	2745	-0.495486	(-0.6510184,-0.3399541)	4.8939e-10	4.23703e-09	4.67857e-09	2539	-0.186366	(-0.2592063,-0.1135257)	5.69952e-07	2.53486e-06	2.61122e-06	1964	-0.301058	(-0.3729666,-0.2291491)	3.4925e-16	1.81424e-15	1.94873e-15	2537
CAR(14:1)	HMDB0002014	QI6194	c14_1_carnitine	HILIC	TRUE	370.295	6.99	TRUE	0.696291	(0.6351597,0.7633057)	1.15463e-14	1.40576e-13	1.53309e-13	2749	0.0072784	(0.0019894,0.0125674)	0.00701084	0.016655	0.0161893	2745	-0.186724	(-0.3379274,-0.0355200)	0.0155244	0.0331177	0.0351461	2539	-0.0617247	(-0.1355660,0.0121165)	0.101297	0.184245	0.179777	1964	-0.0735991	(-0.1438858,-0.0033123)	0.040145	0.0586665	0.061702	2537
NA	NA	QI13613	mz792_6699_rt2_87	HILIC	FALSE	792.67	2.87	TRUE	0.706906	(0.6472575,0.7720514)	1.24345e-14	1.5045e-13	1.63588e-13	2749	-0.0105713	(-0.0159375,-0.0052052)	0.000114674	0.000379906	0.000376299	2745	-0.597584	(-0.7559586,-0.4392091)	1.85715e-13	2.09117e-12	2.35677e-12	2539	-0.268235	(-0.3430964,-0.1933729)	2.90077e-12	2.25127e-11	2.40445e-11	1964	-0.462529	(-0.5346600,-0.3903989)	3.23313e-35	3.77134e-34	4.17685e-34	2537
NA	NA	QI9444	mz645_3248_rt7_99	HILIC	FALSE	645.325	7.99	TRUE	1.50275	(1.3548694,1.6667787)	1.28786e-14	1.54861e-13	1.6789e-13	2749	0.0304879	(0.0252383,0.0357375)	2.17909e-29	9.43304e-28	9.46914e-28	2745	0.794637	(0.6369762,0.9522980)	1.25536e-22	2.57415e-21	3.15822e-21	2539	0.469019	(0.3913591,0.5466798)	2.62322e-31	8.8104e-30	1.04492e-29	1964	0.282338	(0.2085250,0.3561514)	8.74365e-14	3.61627e-13	3.93053e-13	2537
NA	NA	QI5631	mz366_1389_rt6_25	HILIC	FALSE	366.139	6.25	TRUE	0.709291	(0.6494725,0.7746195)	2.15383e-14	2.55833e-13	2.78252e-13	2749	-0.0087729	(-0.0140977,-0.0034481)	0.00124994	0.00350343	0.00346695	2745	-0.690892	(-0.8460381,-0.5357451)	4.44823e-18	6.93212e-17	7.87501e-17	2539	-0.306021	(-0.3791048,-0.2329372)	3.90298e-16	4.08764e-15	4.40699e-15	1964	-0.483308	(-0.5541824,-0.4124343)	1.86317e-39	2.41473e-38	2.71126e-38	2537
Threonine	HMDB0000167	QI9578	threonine	HILIC	TRUE	120.066	7.75	TRUE	0.698879	(0.6374306,0.7662518)	2.35367e-14	2.77876e-13	3.01354e-13	2749	-0.0084263	(-0.0137281,-0.0031246)	0.00184941	0.00506702	0.00498506	2745	-0.570213	(-0.7254285,-0.4149964)	7.69294e-13	8.14448e-12	9.04236e-12	2539	-0.137477	(-0.2130113,-0.0619435)	0.000366294	0.00112369	0.00111521	1964	-0.310617	(-0.3824348,-0.2387994)	3.73603e-17	2.05587e-16	2.21383e-16	2537
NA	NA	QI15636	mz467_3731_rt1_82	HILIC	FALSE	467.373	1.82	TRUE	0.713217	(0.6538348,0.7779923)	2.53131e-14	2.97048e-13	3.2123e-13	2749	-0.0025821	(-0.0077650,0.0026007)	0.328706	0.460993	0.455425	2745	-0.313618	(-0.4619197,-0.1653164)	3.48278e-05	0.000138458	0.000144763	2539	0.0675699	(0.0001838,0.1349560)	0.0493788	0.0987576	0.0956881	1964	-0.220351	(-0.2889790,-0.1517228)	3.58726e-10	1.15313e-09	1.26391e-09	2537
NA	NA	QI14010	mz599_2499_rt2_5	HILIC	FALSE	599.25	2.5	TRUE	0.712729	(0.6528411,0.7781101)	3.95239e-14	4.58289e-13	4.97169e-13	2749	-0.0072902	(-0.0125049,-0.0020755)	0.00616013	0.0148147	0.0144105	2745	-0.0788322	(-0.2279367,0.0702722)	0.299957	0.399396	0.408488	2539	-0.183337	(-0.2553310,-0.1113431)	6.42997e-07	2.85321e-06	2.93649e-06	1964	-0.0894292	(-0.1585635,-0.0202949)	0.011255	0.0178977	0.0189878	2537
NA	NA	QI14562	mz792_6698_rt2_1	HILIC	FALSE	792.67	2.1	TRUE	0.71151	(0.6509560,0.7776978)	6.39488e-14	7.28493e-13	7.97414e-13	2749	-0.0099598	(-0.0153259,-0.0045936)	0.000278359	0.000878838	0.000875186	2745	-0.562931	(-0.7188058,-0.4070553)	1.83779e-12	1.90426e-11	2.10831e-11	2539	-0.229743	(-0.3014572,-0.1580291)	4.08574e-10	2.63544e-09	2.76366e-09	1964	-0.422072	(-0.4933189,-0.3508244)	1.9804e-30	1.97837e-29	2.21867e-29	2537
NA	NA	QI12942	mz241_093_rt3_99	HILIC	FALSE	241.093	3.99	TRUE	1.4091	(1.2880347,1.5415392)	7.28306e-14	8.24849e-13	9.00337e-13	2749	0.0268143	(0.0216695,0.0319590)	4.34942e-24	1.29933e-22	1.37236e-22	2745	0.444194	(0.2918221,0.5965664)	1.21547e-08	8.60995e-08	9.57684e-08	2539	0.420898	(0.3505529,0.4912431)	8.87125e-31	2.74305e-29	3.34773e-29	1964	0.409538	(0.3401489,0.4789277)	3.19636e-30	3.16066e-29	3.52583e-29	2537
NA	NA	QI7122	mz160_0968_rt8_62	HILIC	FALSE	160.097	8.62	TRUE	1.41675	(1.2930155,1.5523146)	7.92699e-14	8.87458e-13	9.71564e-13	2749	0.0057163	(0.0004764,0.0109562)	0.0325143	0.0646965	0.0631782	2745	0.0577412	(-0.0937328,0.2092151)	0.454839	0.554347	0.566419	2539	0.0012302	(-0.0714227,0.0738831)	0.973513	0.984633	0.983111	1964	0.0978072	(0.0275172,0.1680972)	0.00640519	0.010574	0.0112562	2537
NA	NA	QI6325	mz777_5866_rt7_27	HILIC	FALSE	777.587	7.27	TRUE	0.695099	(0.6318209,0.7647155)	8.12683e-14	9.04632e-13	9.87616e-13	2749	0.0070024	(0.0021405,0.0118643)	0.0047753	0.01185	0.0115477	2745	-0.450664	(-0.5943520,-0.3069764)	8.96516e-10	7.52764e-09	8.24105e-09	2539	0.0029488	(-0.0666182,0.0725158)	0.933757	0.956633	0.956044	1964	-0.143508	(-0.2105318,-0.0764849)	2.77823e-05	5.91475e-05	6.38459e-05	2537
NA	NA	QI14216	mz329_149_rt2_24	HILIC	FALSE	329.149	2.24	TRUE	0.701254	(0.6385505,0.7701142)	1.12133e-13	1.24111e-12	1.35125e-12	2749	-0.0182867	(-0.0234143,-0.0131591)	3.36841e-12	2.68921e-11	2.96337e-11	2745	-0.391655	(-0.5441533,-0.2391570)	5.08499e-07	2.92199e-06	3.22649e-06	2539	-0.204778	(-0.2776050,-0.1319505)	3.96135e-08	2.05779e-07	2.12756e-07	1964	-0.221048	(-0.2917311,-0.1503657)	1.0013e-09	3.09608e-09	3.3785e-09	2537
NA	NA	QI597	mz407_3517_rt1_82	HILIC	FALSE	407.352	1.82	TRUE	0.712149	(0.6509522,0.7791001)	1.31228e-13	1.43614e-12	1.56817e-12	2749	-0.0012441	(-0.0065257,0.0040374)	0.644196	0.745629	0.744167	2745	-0.3626	(-0.5160003,-0.2091997)	3.7488e-06	1.88699e-05	1.99835e-05	2539	0.0135995	(-0.0560604,0.0832593)	0.701855	0.793508	0.794365	1964	-0.100131	(-0.1715846,-0.0286772)	0.00604055	0.00999744	0.0106545	2537
CAR(8:2)	NA	QI6558	mz284_1853_rt7_7	HILIC	FALSE	284.185	7.7	TRUE	1.44336	(1.3095815,1.5908154)	1.41887e-13	1.54411e-12	1.68154e-12	2749	0.0206096	(0.0154677,0.0257515)	5.50239e-15	5.70141e-14	6.41498e-14	2745	0.413785	(0.2596328,0.5679366)	1.53128e-07	9.53014e-07	1.0608e-06	2539	0.242458	(0.1689417,0.3159745)	1.25089e-10	8.26011e-10	8.70765e-10	1964	0.152473	(0.0807477,0.2241974)	3.16931e-05	6.71797e-05	7.24847e-05	2537
NA	NA	QI250	mz632_5241_rt1_69	HILIC	FALSE	632.524	1.69	TRUE	1.41756	(1.2917289,1.5556449)	1.87628e-13	2.00824e-12	2.2054e-12	2749	0.0056217	(0.0003055,0.0109379)	0.0382167	0.0746701	0.0727792	2745	0.675922	(0.5193286,0.8325154)	4.30387e-17	6.21033e-16	7.26088e-16	2539	0.354362	(0.2794835,0.4292404)	4.29415e-20	6.28948e-19	7.24448e-19	1964	1.32716	(1.2745023,1.3798236)	0	0	0	2537
NA	NA	NA	__hydroxybutyric_acid_1	AMIDE	TRUE	NA	NA	TRUE	0.707909	(0.6455656,0.7762720)	2.06946e-13	2.2029e-12	2.41269e-12	2749	-0.0092271	(-0.0144700,-0.0039842)	0.000567193	0.00169722	0.00168049	2745	-0.276911	(-0.4284168,-0.1254049)	0.000344779	0.00109564	0.00114713	2539	-0.418823	(-0.4905215,-0.3471242)	1.85759e-29	5.02581e-28	6.05405e-28	1964	-0.327142	(-0.3965575,-0.2577268)	5.0036e-20	3.11406e-19	3.43309e-19	2537
NA	NA	QI13618	mz197_0809_rt2_86	HILIC	FALSE	197.081	2.86	TRUE	1.42814	(1.2985285,1.5706966)	2.11386e-13	2.23793e-12	2.44458e-12	2749	0.0199854	(0.0148397,0.0251312)	3.58996e-14	3.51419e-13	3.92977e-13	2745	0.374336	(0.2234855,0.5251858)	1.20874e-06	6.67033e-06	7.28291e-06	2539	0.304991	(0.2341739,0.3758083)	5.77208e-17	6.57545e-16	7.19753e-16	1964	0.344992	(0.2758095,0.4141737)	3.42313e-22	2.38152e-21	2.63912e-21	2537
NA	NA	QI6460	mz695_5085_rt7_53	HILIC	FALSE	695.509	7.53	TRUE	0.675507	(0.6078561,0.7506876)	3.18856e-13	3.33942e-12	3.65792e-12	2749	0.0256369	(0.0212394,0.0300345)	1.35266e-29	6.12786e-28	6.25714e-28	2745	-0.24813	(-0.3806399,-0.1156203)	0.000245763	0.000819771	0.000859571	2539	0.168761	(0.1051646,0.2323567)	2.15175e-07	9.93272e-07	1.02854e-06	1964	0.144681	(0.0833069,0.2060547)	3.98047e-06	9.16543e-06	9.9616e-06	2537
Palatinose	NA	QI5648	mz360_1497_rt6_26	HILIC	FALSE	360.15	6.26	TRUE	1.40637	(1.2828715,1.5417682)	3.54827e-13	3.65716e-12	4.03827e-12	2749	0.0130672	(0.0077675,0.0183668)	1.40685e-06	5.98372e-06	6.15068e-06	2745	0.382263	(0.2249846,0.5395409)	1.98594e-06	1.057e-05	1.1346e-05	2539	0.157731	(0.0805032,0.2349584)	6.41889e-05	0.000222096	0.000222335	1964	0.111459	(0.0381752,0.1847435)	0.0028875	0.00497774	0.00529498	2537
NA	NA	QI7372	mz292_1976_rt9_33	HILIC	FALSE	292.198	9.33	TRUE	0.71379	(0.6517513,0.7817336)	3.65263e-13	3.74491e-12	4.12431e-12	2749	-0.0104576	(-0.0157099,-0.0052052)	9.68765e-05	0.000325371	0.000320094	2745	-0.208549	(-0.3617897,-0.0553093)	0.00766417	0.0176475	0.0186595	2539	-0.113211	(-0.1877421,-0.0386801)	0.00292759	0.0078553	0.00776001	1964	-0.281735	(-0.3522030,-0.2112668)	6.59278e-15	3.09464e-14	3.32889e-14	2537
NA	NA	QI15369	mz409_3294_rt1_87	HILIC	FALSE	409.329	1.87	TRUE	0.724853	(0.6645090,0.7906763)	3.98792e-13	4.04608e-12	4.46772e-12	2749	-0.005173	(-0.0104958,0.0001498)	0.0567985	0.105475	0.103231	2745	-0.276354	(-0.4278509,-0.1248562)	0.000354106	0.00112211	0.00117544	2539	0.0044155	(-0.0653205,0.0741515)	0.901189	0.934282	0.934422	1964	-0.197574	(-0.2677385,-0.1274095)	3.70041e-08	9.88806e-08	1.1055e-07	2537
NA	NA	QI11307	mz603_293_rt5_75	HILIC	FALSE	603.293	5.75	TRUE	1.39926	(1.2776472,1.5324400)	4.42535e-13	4.46662e-12	4.91934e-12	2749	0.0283395	(0.0230569,0.0336220)	2.13013e-25	7.40981e-24	7.63652e-24	2745	1.04628	(0.8906876,1.2018707)	1.8901e-38	9.44081e-37	1.00385e-36	2539	0.437435	(0.3624991,0.5123709)	2.02091e-29	5.39278e-28	6.43997e-28	1964	0.463979	(0.3914949,0.5364636)	4.20833e-35	4.85079e-34	5.38817e-34	2537
Malic acid	NA	NA	malic_acid	AMIDE	TRUE	NA	NA	TRUE	1.40091	(1.2784906,1.5350496)	4.97824e-13	4.97313e-12	5.49138e-12	2749	4.09e-05	(-0.0051716,0.0052533)	0.987735	0.993767	0.993699	2745	0.475526	(0.3246854,0.6263663)	7.36549e-10	6.23825e-09	6.81427e-09	2539	-0.0738056	(-0.1478172,0.0002061)	0.0506407	0.101178	0.098001	1964	0.134886	(0.0644873,0.2052845)	0.000175739	0.000349326	0.000376134	2537
NA	NA	QI8711	mz203_1392_rt9_71	HILIC	FALSE	203.139	9.71	TRUE	1.41475	(1.2875922,1.5544722)	5.18474e-13	5.153e-12	5.67551e-12	2749	0.0105614	(0.0055291,0.0155937)	3.98225e-05	0.000139773	0.000137936	2745	0.33106	(0.1849785,0.4771417)	9.2129e-06	4.1989e-05	4.42454e-05	2539	0.177919	(0.1091380,0.2466990)	4.28376e-07	1.91834e-06	1.98158e-06	1964	0.307455	(0.2403817,0.3745275)	4.7828e-19	2.85794e-18	3.13175e-18	2537
Glutamic acid	HMDB0000148	QI9536	mz223_972_rt7_79	HILIC	FALSE	223.972	7.79	TRUE	1.40817	(1.2825523,1.5460819)	6.96998e-13	6.89214e-12	7.57193e-12	2749	0.0224804	(0.0172150,0.0277459)	8.94559e-17	1.15404e-15	1.23346e-15	2745	0.701584	(0.5446871,0.8584804)	3.25733e-18	5.24403e-17	5.98848e-17	2539	0.408865	(0.3313991,0.4863317)	1.7475e-24	3.4736e-23	4.17653e-23	1964	0.341619	(0.2688898,0.4143479)	6.60395e-20	4.08397e-19	4.48818e-19	2537
NA	NA	QI12819	mz199_1077_rt4_21	HILIC	FALSE	199.108	4.21	TRUE	1.39563	(1.2741116,1.5287337)	7.38742e-13	7.26803e-12	7.96508e-12	2749	0.0061571	(0.0012395,0.0110747)	0.0141478	0.0311411	0.0303258	2745	0.166794	(0.0256549,0.3079328)	0.0205649	0.042392	0.0449544	2539	-0.00605	(-0.0682017,0.0561016)	0.848618	0.896966	0.896111	1964	0.313894	(0.2494003,0.3783886)	3.12025e-21	2.05346e-20	2.27129e-20	2537
CAR(8:1)	HMDB0013324	QI9694	mz286_2009_rt7_62	HILIC	FALSE	286.201	7.62	TRUE	1.41064	(1.2840219,1.5497452)	7.50067e-13	7.34236e-12	8.02634e-12	2749	0.0227811	(0.0176304,0.0279317)	7.10742e-18	1.041e-16	1.09592e-16	2745	0.474668	(0.3206174,0.6287195)	1.74608e-09	1.42316e-08	1.56492e-08	2539	0.287495	(0.2144835,0.3605060)	1.80677e-14	1.66805e-13	1.82458e-13	1964	0.222668	(0.1511365,0.2941990)	1.19318e-09	3.66034e-09	3.98839e-09	2537
NA	NA	QI9480	mz258_1692_rt7_88	HILIC	FALSE	258.169	7.88	TRUE	1.47117	(1.3238056,1.6349353)	7.55618e-13	7.35972e-12	8.02634e-12	2749	0.018696	(0.0136430,0.0237490)	5.203e-13	4.50464e-12	4.94113e-12	2745	0.317686	(0.1654494,0.4699222)	4.41046e-05	0.000171147	0.000178661	2539	0.220786	(0.1455596,0.2960121)	9.97693e-09	5.53705e-08	5.79227e-08	1964	0.0675051	(-0.0035399,0.1385500)	0.0625502	0.0884879	0.0929502	2537
NA	NA	QI9672	mz306_0748_rt7_63	HILIC	FALSE	306.075	7.63	TRUE	0.717382	(0.6549466,0.7857698)	8.71081e-13	8.35894e-12	9.11774e-12	2749	-0.0253513	(-0.0306063,-0.0200963)	6.42501e-21	1.33148e-19	1.39598e-19	2745	-0.929939	(-1.0828254,-0.7770520)	6.01165e-32	1.98486e-30	2.32992e-30	2539	-0.414698	(-0.4892588,-0.3401376)	6.182e-27	1.4686e-25	1.80918e-25	1964	-0.320028	(-0.3919488,-0.2481070)	4.71481e-18	2.73347e-17	2.96537e-17	2537
NA	NA	QI12663	mz263_1025_rt4_46	HILIC	FALSE	263.103	4.46	TRUE	1.41243	(1.2848742,1.5526496)	8.64864e-13	8.34037e-12	9.11774e-12	2749	0.0068189	(0.0016974,0.0119405)	0.00908534	0.0208952	0.0203568	2745	0.163474	(0.0181989,0.3087484)	0.0274351	0.0543126	0.0574335	2539	0.0941667	(0.0255670,0.1627665)	0.00716077	0.0178378	0.0174621	1964	0.246882	(0.1799629,0.3138018)	6.17459e-13	2.41528e-12	2.62741e-12	2537
NA	NA	QI6892	mz638_1461_rt8_2	HILIC	FALSE	638.146	8.2	TRUE	0.727688	(0.6669265,0.7939856)	8.96394e-13	8.55968e-12	9.3147e-12	2749	-0.0084285	(-0.0137117,-0.0031452)	0.00177777	0.00490273	0.00483263	2745	-0.494702	(-0.6514836,-0.3379193)	7.11423e-10	6.0783e-09	6.66785e-09	2539	-0.141432	(-0.2169959,-0.0658686)	0.000248334	0.00078151	0.000777535	1964	-0.119293	(-0.1925227,-0.0460642)	0.00141848	0.00253737	0.00270133	2537
Arginine	HMDB0000517	QI8815	arginine	HILIC	TRUE	175.119	9.36	TRUE	0.724325	(0.6629436,0.7913900)	9.43468e-13	8.96525e-12	9.73333e-12	2749	-0.0168441	(-0.0221442,-0.0115440)	5.32502e-10	3.357e-09	3.56826e-09	2745	-0.338898	(-0.4958759,-0.1819198)	2.38422e-05	9.88183e-05	0.000103292	2539	-0.0622529	(-0.1387303,0.0142245)	0.11056	0.197226	0.192875	1964	-0.125406	(-0.1983724,-0.0524404)	0.000762409	0.00140908	0.00150592	2537
Trimethylamine N-oxide	HMDB0000925	QI6979	trimethylamine_n_oxide	HILIC	TRUE	76.0757	8.32	TRUE	1.37142	(1.2570575,1.4961787)	1.16307e-12	1.07889e-11	1.19132e-11	2749	0.0076015	(0.0023502,0.0128527)	0.00456744	0.0113688	0.0110879	2745	0.34161	(0.1869334,0.4962862)	1.5439e-05	6.63911e-05	6.96212e-05	2539	0.0779399	(0.0044213,0.1514586)	0.0377363	0.0783692	0.075578	1964	0.0341701	(-0.0379682,0.1063083)	0.353066	0.426658	0.439112	2537
CAR(12:1)	HMDB0013326	QI6288	c12_1_carnitine	HILIC	TRUE	342.263	7.14	TRUE	0.721304	(0.6590843,0.7893980)	1.26565e-12	1.16297e-11	1.28719e-11	2749	0.0090886	(0.0037560,0.0144211)	0.000843118	0.00244404	0.00242777	2745	-0.220831	(-0.3746453,-0.0670157)	0.00491165	0.0118122	0.0126224	2539	0.0436905	(-0.0310011,0.1183822)	0.251447	0.37534	0.371344	1964	0.0220341	(-0.0495314,0.0935996)	0.546073	0.611702	0.621977	2537
NA	NA	QI5171	mz160_0969_rt5_96	HILIC	FALSE	160.097	5.96	TRUE	1.39291	(1.2708890,1.5266528)	1.39377e-12	1.27468e-11	1.40751e-11	2749	0.0172349	(0.0120835,0.0223863)	6.39673e-11	4.38762e-10	4.77756e-10	2745	0.27862	(0.1255806,0.4316604)	0.000363667	0.00115004	0.00120438	2539	0.135922	(0.0630649,0.2087800)	0.000260146	0.000816046	0.000810977	1964	0.125461	(0.0543805,0.1965421)	0.000546898	0.00103033	0.00110303	2537
NA	NA	QI4144	mz486_1732_rt5_09	HILIC	FALSE	486.173	5.09	TRUE	1.43404	(1.2977778,1.5846159)	1.47682e-12	1.33807e-11	1.47067e-11	2749	0.0234762	(0.0181859,0.0287665)	5.55665e-18	8.20027e-17	8.66113e-17	2745	0.769193	(0.6149550,0.9234316)	3.4002e-22	6.82844e-21	8.26421e-21	2539	0.424227	(0.3481927,0.5002621)	4.32908e-27	1.05413e-25	1.29331e-25	1964	0.389505	(0.3179417,0.4610677)	4.83669e-26	3.90949e-25	4.38976e-25	2537
hydroxydehydro nifedipine	NA	QI3190	mz347_0869_rt3_88	HILIC	FALSE	347.087	3.88	TRUE	1.3529	(1.2442610,1.4710297)	1.47504e-12	1.33807e-11	1.47067e-11	2749	0.0210469	(0.0157940,0.0262998)	5.62503e-15	5.79765e-14	6.50508e-14	2745	0.893436	(0.7411707,1.0457007)	6.72374e-30	1.98452e-28	2.41046e-28	2539	0.320042	(0.2447167,0.3953672)	1.46719e-16	1.59027e-15	1.74148e-15	1964	0.269577	(0.1974919,0.3416615)	3.00883e-13	1.21099e-12	1.30747e-12	2537
NA	NA	QI10992	mz224_1129_rt5_97	HILIC	FALSE	224.113	5.97	TRUE	1.38664	(1.2665497,1.5181103)	1.52012e-12	1.37092e-11	1.50335e-11	2749	0.0044434	(-0.0007051,0.0095918)	0.0907047	0.158611	0.155215	2745	0.338522	(0.1889780,0.4880656)	9.42964e-06	4.2818e-05	4.50737e-05	2539	-0.0016617	(-0.0715566,0.0682332)	0.962816	0.976857	0.975744	1964	0.12574	(0.0562233,0.1952573)	0.000396986	0.000760402	0.000815584	2537
Citrulline	HMDB0000904	QI9105	citrulline	HILIC	TRUE	176.103	8.54	TRUE	0.712413	(0.6482154,0.7829693)	1.95266e-12	1.74485e-11	1.91789e-11	2749	-0.021139	(-0.0261049,-0.0161731)	1.09719e-16	1.39695e-15	1.49845e-15	2745	-0.409132	(-0.5512878,-0.2669766)	1.85059e-08	1.26489e-07	1.4041e-07	2539	-0.194786	(-0.2579380,-0.1316329)	1.74146e-09	1.06011e-08	1.11485e-08	1964	-0.138272	(-0.2044403,-0.0721035)	4.30413e-05	8.97692e-05	9.67417e-05	2537
NA	NA	QI9385	mz192_9986_rt8_08	HILIC	FALSE	192.999	8.08	TRUE	0.730961	(0.6697882,0.7977205)	2.09388e-12	1.85404e-11	2.0288e-11	2749	-0.0215566	(-0.0268705,-0.0162427)	2.60895e-15	2.83924e-14	3.17054e-14	2745	-0.717116	(-0.8729824,-0.5612485)	3.566e-19	6.14741e-18	7.00499e-18	2539	-0.286101	(-0.3615572,-0.2106456)	1.54238e-13	1.31203e-12	1.43622e-12	1964	-0.578479	(-0.6485109,-0.5084463)	3.19716e-56	6.6256e-55	7.16364e-55	2537
NA	NA	QI2179	mz301_118_rt2_5	HILIC	FALSE	301.118	2.5	TRUE	0.714279	(0.6503048,0.7845475)	2.08988e-12	1.85404e-11	2.0288e-11	2749	-0.0067939	(-0.0120272,-0.0015606)	0.0109645	0.0248359	0.0242266	2745	-0.279707	(-0.4347039,-0.1247100)	0.000409437	0.0012885	0.00134663	2539	-0.188239	(-0.2646634,-0.1118142)	1.46758e-06	6.10864e-06	6.22636e-06	1964	-0.180512	(-0.2523763,-0.1086486)	8.95552e-07	2.13529e-06	2.33071e-06	2537
N-AcetylGlucosamine	HMDB0000212*	QI4667	mz186_0761_rt5_58	HILIC	FALSE	186.076	5.58	TRUE	1.38728	(1.2659732,1.5202169)	2.35878e-12	2.07914e-11	2.27013e-11	2749	0.0194411	(0.0143657,0.0245164)	7.89733e-14	7.57832e-13	8.38872e-13	2745	0.499876	(0.3504565,0.6492964)	6.49644e-11	5.94135e-10	6.51461e-10	2539	0.17715	(0.1062274,0.2480731)	1.04443e-06	4.46173e-06	4.58016e-06	1964	0.27025	(0.2009832,0.3395171)	2.82315e-14	1.23307e-13	1.33171e-13	2537
NA	NA	QI7228	mz129_066_rt8_82	HILIC	FALSE	129.066	8.82	TRUE	0.661207	(0.5889425,0.7423390)	2.46025e-12	2.15881e-11	2.352e-11	2749	-0.0074241	(-0.0116328,-0.0032153)	0.000550767	0.00165315	0.00163859	2745	-0.677283	(-0.7994325,-0.5551343)	6.06261e-27	1.55394e-25	1.84974e-25	2539	-0.0520329	(-0.1102709,0.0062052)	0.0798934	0.150661	0.146132	1964	-0.0237482	(-0.0818286,0.0343323)	0.422755	0.498201	0.50901	2537
NA	NA	QI2727	mz191_055_rt3_08	HILIC	FALSE	191.055	3.08	TRUE	1.43849	(1.2986152,1.5934320)	3.25207e-12	2.82814e-11	3.08335e-11	2749	0.026307	(0.0211304,0.0314835)	5.32566e-23	1.34732e-21	1.41426e-21	2745	0.472559	(0.3185032,0.6266143)	2.059e-09	1.66429e-08	1.8226e-08	2539	0.369257	(0.2950544,0.4434593)	5.2805e-22	8.8676e-21	1.02328e-20	1964	0.476928	(0.4073195,0.5465369)	8.39577e-40	1.10506e-38	1.24119e-38	2537
NA	NA	QI1234	mz283_1075_rt2_02	HILIC	FALSE	283.108	2.02	TRUE	0.722601	(0.6594715,0.7917733)	3.26827e-12	2.8296e-11	3.08335e-11	2749	-0.0244697	(-0.0295827,-0.0193566)	1.28902e-20	2.51101e-19	2.64065e-19	2745	-0.364071	(-0.5171954,-0.2109461)	3.28976e-06	1.66887e-05	1.76686e-05	2539	-0.224315	(-0.2973377,-0.1512928)	2.0214e-09	1.21534e-08	1.27135e-08	1964	-0.249519	(-0.3202205,-0.1788171)	5.68624e-12	2.08603e-11	2.27133e-11	2537
NA	NA	QI15608	mz523_4366_rt1_82	HILIC	FALSE	523.437	1.82	TRUE	0.731578	(0.6698577,0.7989855)	3.64553e-12	3.14225e-11	3.41679e-11	2749	-0.0024951	(-0.0076181,0.0026280)	0.339672	0.471283	0.46514	2745	-0.353738	(-0.5000739,-0.2074023)	2.2544e-06	1.18371e-05	1.26282e-05	2539	0.0526068	(-0.0153552,0.1205689)	0.129158	0.224643	0.220229	1964	-0.221219	(-0.2890108,-0.1534275)	1.85873e-10	6.12658e-10	6.7479e-10	2537
N-AcetylGlucosamine	NA	QI10118	mz740_5579_rt6_77	HILIC	FALSE	740.558	6.77	TRUE	0.732017	(0.6703321,0.7993783)	3.77187e-12	3.23683e-11	3.51225e-11	2749	-0.0071397	(-0.0124838,-0.0017956)	0.00885076	0.0204281	0.0198934	2745	-0.56595	(-0.7243034,-0.4075958)	3.08317e-12	3.12813e-11	3.48131e-11	2539	-0.308217	(-0.3839598,-0.2324740)	2.4574e-15	2.50629e-14	2.7107e-14	1964	-0.621925	(-0.6923090,-0.5515415)	1.19636e-63	2.77442e-62	3.06354e-62	2537
Ketoisovaleric acid	NA	NA	__ketoisovaleric_acid_kiv	AMIDE	TRUE	NA	NA	TRUE	1.46609	(1.3157218,1.6336370)	4.21685e-12	3.58708e-11	3.90127e-11	2349	0.0192616	(0.0136544,0.0248688)	2.0389e-11	1.49315e-10	1.65185e-10	2345	0.870595	(0.7040878,1.0371012)	4.01692e-24	8.892e-23	1.10774e-22	2172	0.279895	(0.1980361,0.3617536)	2.71146e-11	1.93477e-10	2.06821e-10	1696	0.263109	(0.1847854,0.3414317)	5.5887e-11	1.92687e-10	2.12578e-10	2172
NA	NA	QI9873	mz779_6024_rt7_25	HILIC	FALSE	779.602	7.25	TRUE	0.712091	(0.6467578,0.7840231)	4.66049e-12	3.9132e-11	4.28407e-11	2749	0.0046879	(-0.0002305,0.0096063)	0.061739	0.11346	0.110806	2745	-0.359751	(-0.5061081,-0.2133938)	1.52071e-06	8.22873e-06	8.90081e-06	2539	-0.070966	(-0.1423335,0.0004015)	0.0513016	0.102393	0.0991462	1964	-0.123039	(-0.1911470,-0.0549303)	0.000403679	0.000771704	0.000826965	2537
NA	NA	QI5641	mz614_3809_rt6_26	HILIC	FALSE	614.381	6.26	TRUE	0.735398	(0.6740102,0.8023766)	4.82214e-12	4.01433e-11	4.40443e-11	2749	-0.012226	(-0.0175477,-0.0069043)	6.92215e-06	2.68078e-05	2.71212e-05	2745	-0.649233	(-0.8065012,-0.4919641)	8.79926e-16	1.19867e-14	1.37154e-14	2539	-0.332997	(-0.4062003,-0.2597931)	1.03356e-18	1.37902e-17	1.57673e-17	1964	-0.597498	(-0.6677549,-0.5272404)	2.53555e-59	5.54972e-58	6.05996e-58	2537
Glutamic acid	HMDB0000148	QI6640	glutamate	HILIC	TRUE	148.06	7.77	TRUE	1.38357	(1.2617649,1.5171285)	5.01688e-12	4.15867e-11	4.55329e-11	2749	0.0223834	(0.0171070,0.0276598)	1.38975e-16	1.73541e-15	1.8801e-15	2745	0.672354	(0.5149387,0.8297700)	8.98556e-17	1.2684e-15	1.48107e-15	2539	0.397643	(0.3202777,0.4750094)	2.48174e-23	4.51816e-22	5.23355e-22	1964	0.326001	(0.2530050,0.3989981)	3.58457e-18	2.0844e-17	2.26444e-17	2537
Trimethylamine N-oxide	HMDB0000925	QI9214	mz151_144_rt8_32	HILIC	FALSE	151.144	8.32	TRUE	1.37169	(1.2539274,1.5005115)	5.17164e-12	4.26879e-11	4.66423e-11	2749	0.0076465	(0.0023901,0.0129030)	0.0043715	0.0109597	0.0106975	2745	0.324218	(0.1691866,0.4792501)	4.24627e-05	0.000166099	0.00017348	2539	0.0615048	(-0.0131687,0.1361783)	0.106402	0.190857	0.186529	1964	0.0236054	(-0.0486771,0.0958879)	0.521987	0.589809	0.599783	2537
NA	NA	QI1249	mz478_197_rt2_02	HILIC	FALSE	478.197	2.02	TRUE	0.723834	(0.6603007,0.7934805)	5.37614e-12	4.41887e-11	4.81837e-11	2749	-0.0134384	(-0.0186114,-0.0082653)	3.74789e-07	1.70981e-06	1.77375e-06	2745	-0.263892	(-0.4175558,-0.1102287)	0.000769778	0.00228239	0.00241545	2539	-0.155193	(-0.2291253,-0.0812599)	4.00262e-05	0.000141508	0.000142426	1964	-0.124895	(-0.1963035,-0.0534872)	0.000613955	0.0011522	0.00123307	2537
SM(d18:1_16:0)	HMDB0010169	QI6374	mz343_2853_rt7_39	HILIC	FALSE	343.285	7.39	TRUE	0.731688	(0.6694435,0.7997197)	5.70211e-12	4.66711e-11	5.07877e-11	2749	-0.0131169	(-0.0184177,-0.0078162)	1.28976e-06	5.53404e-06	5.67336e-06	2745	-0.448813	(-0.6062465,-0.2913794)	2.51137e-08	1.68695e-07	1.87568e-07	2539	-0.297309	(-0.3717533,-0.2228643)	7.7836e-15	7.46919e-14	8.08818e-14	1964	-0.416187	(-0.4878353,-0.3445379)	2.39036e-29	2.23866e-28	2.52042e-28	2537
CAR(18:1)	HMDB0005065	QI6076	c18_1_carnitine	HILIC	TRUE	426.357	6.77	TRUE	0.72628	(0.6630441,0.7955473)	5.93703e-12	4.83905e-11	5.25537e-11	2749	0.011159	(0.0059401,0.0163779)	2.84449e-05	0.000101643	0.000100624	2745	-0.232017	(-0.3825680,-0.0814658)	0.00253642	0.00664106	0.00702167	2539	-0.158795	(-0.2316145,-0.0859752)	1.98849e-05	7.25389e-05	7.34921e-05	1964	-0.225985	(-0.2954745,-0.1564947)	2.14002e-10	7.00632e-10	7.71052e-10	2537
DG(34:1)	HMDB0007021	QI201	mz577_5184_rt1_67	HILIC	FALSE	577.518	1.67	TRUE	1.38802	(1.2642392,1.5239262)	5.99676e-12	4.86737e-11	5.27568e-11	2749	0.0290459	(0.0237950,0.0342968)	7.21979e-27	2.87023e-25	2.95805e-25	2745	0.712526	(0.5549737,0.8700777)	1.37313e-18	2.32596e-17	2.6609e-17	2539	0.434013	(0.3613260,0.5067010)	1.15953e-30	3.47502e-29	4.15692e-29	1964	1.04257	(0.9803284,1.1048211)	2.1746e-197	1.92551e-195	2.07892e-195	2537
NA	NA	QI15919	mz606_5094_rt1_7	HILIC	FALSE	606.509	1.7	TRUE	1.40358	(1.2743099,1.5459729)	6.11289e-12	4.94104e-11	5.34505e-11	2749	0.0115979	(0.0062536,0.0169423)	2.15817e-05	7.81434e-05	7.77592e-05	2745	0.707093	(0.5484992,0.8656871)	4.06442e-18	6.38507e-17	7.28547e-17	2539	0.471473	(0.3961964,0.5467487)	1.83294e-33	7.14113e-32	9.06357e-32	1964	1.3237	(1.2694893,1.3779070)	0	0	0	2537
NA	NA	QI15993	mz575_5026_rt1_67	HILIC	FALSE	575.503	1.67	TRUE	1.38666	(1.2626589,1.5228366)	7.9472e-12	6.34473e-11	6.90684e-11	2749	0.0250393	(0.0197471,0.0303316)	3.42211e-20	6.28893e-19	6.54307e-19	2745	0.625963	(0.4687634,0.7831628)	8.4196e-15	1.05137e-13	1.1837e-13	2539	0.408502	(0.3345929,0.4824104)	1.25173e-26	2.86867e-25	3.51957e-25	1964	1.15782	(1.0992837,1.2163463)	9.7032e-259	1.45399e-256	1.54604e-256	2537
NA	NA	QI9575	mz741_5297_rt7_75	HILIC	FALSE	741.53	7.75	TRUE	0.731254	(0.6684612,0.7999459)	8.33489e-12	6.62709e-11	7.20014e-11	2749	-0.0065011	(-0.0117920,-0.0012102)	0.0160477	0.0348505	0.0338418	2745	-0.455968	(-0.6118060,-0.3001300)	1.07562e-08	7.67512e-08	8.56911e-08	2539	-0.267304	(-0.3414469,-0.1931616)	2.138e-12	1.67936e-11	1.80347e-11	1964	-0.496947	(-0.5671341,-0.4267602)	2.70605e-42	3.93387e-41	4.36009e-41	2537
N-Acetylglutamic acid	HMDB0001138	QI3565	acetylglutamic_acid	HILIC	TRUE	190.071	4.51	TRUE	1.36157	(1.2458661,1.4880299)	9.6656e-12	7.62291e-11	8.29968e-11	2749	0.0182474	(0.0131694,0.0233253)	2.31868e-12	1.86644e-11	2.06521e-11	2745	0.153812	(0.0078075,0.2998160)	0.0389528	0.0737415	0.0772591	2539	0.0525936	(-0.0166580,0.1218453)	0.136536	0.236035	0.231433	1964	0.080997	(0.0129873,0.1490068)	0.0196024	0.03002	0.0318345	2537
NA	NA	QI590	mz435_3466_rt1_82	HILIC	FALSE	435.347	1.82	TRUE	0.734215	(0.6716201,0.8026432)	1.0794e-11	8.47851e-11	9.21345e-11	2749	-0.0054489	(-0.0105884,-0.0003094)	0.0377231	0.0740772	0.0721266	2745	-0.335638	(-0.4851226,-0.1861538)	1.11283e-05	4.90451e-05	5.18116e-05	2539	-0.0485536	(-0.1186040,0.0214968)	0.174196	0.285357	0.280476	1964	-0.297912	(-0.3666517,-0.2291729)	3.23067e-17	1.79298e-16	1.93033e-16	2537
NA	NA	QI2551	mz546_2549_rt2_83	HILIC	FALSE	546.255	2.83	TRUE	1.40649	(1.2745800,1.5520539)	1.13305e-11	8.86418e-11	9.61416e-11	2749	0.0282403	(0.0231234,0.0333572)	9.35113e-27	3.6432e-25	3.72487e-25	2745	0.55394	(0.4013463,0.7065346)	1.41608e-12	1.47515e-11	1.63763e-11	2539	0.377716	(0.3043975,0.4510337)	1.97755e-23	3.63421e-22	4.23255e-22	1964	0.42307	(0.3533585,0.4927823)	8.16797e-32	8.69465e-31	9.68006e-31	2537
NA	NA	QI9541	mz193_9983_rt7_78	HILIC	FALSE	193.998	7.78	TRUE	1.40068	(1.2707995,1.5438445)	1.14848e-11	8.9133e-11	9.63111e-11	2749	0.0234485	(0.0183106,0.0285865)	6.47113e-19	1.0867e-17	1.13166e-17	2745	0.844728	(0.6928723,0.9965844)	4.18956e-27	1.08817e-25	1.30605e-25	2539	0.416074	(0.3427292,0.4894188)	6.35116e-28	1.58616e-26	1.97991e-26	1964	0.376673	(0.3060666,0.4472801)	4.20428e-25	3.26292e-24	3.63189e-24	2537
NA	NA	QI14012	mz315_1336_rt2_5	HILIC	FALSE	315.134	2.5	TRUE	0.728395	(0.6646943,0.7982014)	1.14404e-11	8.9133e-11	9.63111e-11	2749	-0.0065176	(-0.0116610,-0.0013743)	0.0130232	0.0287633	0.0280409	2745	-0.221087	(-0.3732779,-0.0688964)	0.00442668	0.0108878	0.0116689	2539	-0.164722	(-0.2388582,-0.0905868)	1.38336e-05	5.15255e-05	5.19303e-05	1964	-0.146555	(-0.2171419,-0.0759671)	4.81956e-05	0.000100091	0.000107602	2537
NA	NA	QI613	mz503_4099_rt1_83	HILIC	FALSE	503.41	1.83	TRUE	0.748723	(0.6882234,0.8145403)	1.67601e-11	1.27038e-10	1.39732e-10	2749	-0.0083871	(-0.0136768,-0.0030974)	0.00189663	0.00516732	0.00507419	2745	-0.359742	(-0.5121789,-0.2073052)	3.88536e-06	1.93079e-05	2.04088e-05	2539	-0.0110928	(-0.0810866,0.0589010)	0.755977	0.832472	0.835186	1964	-0.289196	(-0.3594130,-0.2189796)	1.02249e-15	5.10721e-15	5.51222e-15	2537
NA	NA	QI625	mz433_3307_rt1_83	HILIC	FALSE	433.331	1.83	TRUE	0.730777	(0.6669756,0.8006804)	1.70635e-11	1.28636e-10	1.40952e-10	2749	-0.0019609	(-0.0072642,0.0033424)	0.468504	0.596501	0.592447	2745	-0.352637	(-0.5055070,-0.1997670)	6.36691e-06	2.97428e-05	3.11609e-05	2539	-0.0716924	(-0.1402641,-0.0031206)	0.0404556	0.0832181	0.0804623	1964	-0.270704	(-0.3412598,-0.2001480)	7.36658e-14	3.05972e-13	3.33239e-13	2537
NA	NA	QI15705	mz565_447_rt1_79	HILIC	FALSE	565.447	1.79	TRUE	0.730606	(0.6667716,0.8005517)	1.7103e-11	1.28636e-10	1.40952e-10	2749	-0.0055429	(-0.0105383,-0.0005474)	0.0296619	0.0595071	0.0580188	2745	-0.311161	(-0.4514103,-0.1709122)	1.41191e-05	6.09845e-05	6.40721e-05	2539	-0.0108714	(-0.0753940,0.0536513)	0.741105	0.819335	0.822385	1964	-0.23816	(-0.3029043,-0.1734162)	7.18879e-13	2.79516e-12	3.03198e-12	2537
3-Dehydroxycarnitine	HMDB0001161	QI7296	butyrobetaine	HILIC	TRUE	146.117	8.98	TRUE	0.709627	(0.6419602,0.7844263)	1.96383e-11	1.46572e-10	1.60922e-10	2749	-0.0060261	(-0.0108921,-0.0011601)	0.0152329	0.0332665	0.0323614	2745	-0.429169	(-0.5735178,-0.2848202)	6.24549e-09	4.63487e-08	5.15708e-08	2539	-0.0868134	(-0.1575717,-0.0160551)	0.016213	0.0370692	0.0358235	1964	-0.219928	(-0.2868826,-0.1529744)	1.41457e-10	4.71846e-10	5.20127e-10	2537
NA	NA	QI15750	mz484_3997_rt1_78	HILIC	FALSE	484.4	1.78	TRUE	0.744692	(0.6832207,0.8116934)	1.99554e-11	1.47841e-10	1.6171e-10	2749	6.44e-05	(-0.0051277,0.0052565)	0.980599	0.988282	0.988948	2745	-0.260689	(-0.4095036,-0.1118739)	0.000602	0.00184968	0.00193993	2539	0.0913628	(0.0247923,0.1579333)	0.00717238	0.0178439	0.0174621	1964	-0.206759	(-0.2756058,-0.1379113)	4.40321e-09	1.28597e-08	1.41574e-08	2537
NA	NA	QI3344	mz146_0632_rt4_17	HILIC	FALSE	146.063	4.17	TRUE	1.33741	(1.2284631,1.4560111)	1.996e-11	1.47841e-10	1.6171e-10	2749	0.0131659	(0.0078486,0.0184833)	1.27101e-06	5.48474e-06	5.62958e-06	2745	0.420368	(0.2614553,0.5792802)	2.30453e-07	1.39417e-06	1.5515e-06	2539	0.105295	(0.0272467,0.1833436)	0.00821445	0.0200523	0.0195673	1964	0.0861285	(0.0120438,0.1602133)	0.0227094	0.0343996	0.0363452	2537
NA	NA	QI6906	mz337_109_rt8_21	HILIC	FALSE	337.109	8.21	TRUE	0.736923	(0.6739789,0.8057464)	2.06657e-11	1.52488e-10	1.66487e-10	2749	-0.0127591	(-0.0181207,-0.0073975)	3.21521e-06	1.29943e-05	1.32489e-05	2745	-0.600299	(-0.7593808,-0.4412171)	1.8492e-13	2.09117e-12	2.35677e-12	2539	-0.139145	(-0.2171129,-0.0611774)	0.00047564	0.00144322	0.00143593	1964	-0.36429	(-0.4375530,-0.2910272)	4.47305e-22	3.08989e-21	3.41189e-21	2537
NA	NA	QI9809	mz760_0499_rt7_42	HILIC	FALSE	760.05	7.42	TRUE	0.735921	(0.6726531,0.8051407)	2.30076e-11	1.68492e-10	1.84318e-10	2749	-0.0138578	(-0.0191706,-0.0085451)	3.36045e-07	1.55122e-06	1.61708e-06	2745	-0.445595	(-0.6027689,-0.2884214)	2.9927e-08	1.9965e-07	2.22359e-07	2539	-0.226228	(-0.3012686,-0.1511867)	3.96787e-09	2.30042e-08	2.41099e-08	1964	-0.345783	(-0.4180254,-0.2735407)	1.34408e-20	8.55643e-20	9.44809e-20	2537
NA	NA	QI651	mz567_4622_rt1_83	HILIC	FALSE	567.462	1.83	TRUE	0.735892	(0.6725634,0.8051838)	2.39819e-11	1.74969e-10	1.91056e-10	2749	-0.0056534	(-0.0106919,-0.0006148)	0.0278835	0.0562871	0.0549999	2745	-0.302968	(-0.4472898,-0.1586452)	3.9713e-05	0.000156285	0.000163176	2539	-0.0371207	(-0.1047203,0.0304788)	0.281642	0.409432	0.40878	1964	-0.259776	(-0.3262858,-0.1932666)	2.64893e-14	1.16219e-13	1.25365e-13	2537
N6-Acetyllysine	HMDB0000206	QI9087	n6_acetyllysine	HILIC	TRUE	189.123	8.59	TRUE	1.35988	(1.2423071,1.4885875)	2.6902e-11	1.95541e-10	2.13135e-10	2749	0.008003	(0.0029231,0.0130830)	0.00202767	0.00548884	0.00538741	2745	0.177388	(0.0304445,0.3243324)	0.0179995	0.0378242	0.040142	2539	0.0234724	(-0.0460478,0.0929925)	0.507947	0.630644	0.634491	1964	0.279913	(0.2124625,0.3473626)	6.25086e-16	3.17101e-15	3.40826e-15	2537
NA	NA	QI3745	mz147_0763_rt4_71	HILIC	FALSE	147.076	4.71	TRUE	1.36761	(1.2472501,1.4995896)	2.72913e-11	1.97634e-10	2.15031e-10	2749	0.0031795	(-0.0018564,0.0082153)	0.215823	0.328456	0.322722	2745	0.169529	(0.0228501,0.3162086)	0.0235124	0.0473163	0.0500992	2539	0.0461098	(-0.0221988,0.1144184)	0.185712	0.299636	0.294749	1964	0.0097366	(-0.0585253,0.0779985)	0.779735	0.818484	0.825805	2537
PE(38:6)	HMDB0009102	QI4671	c38_6_pe	HILIC	TRUE	764.521	5.59	TRUE	1.38973	(1.2613057,1.5312347)	2.88234e-11	2.07955e-10	2.25862e-10	2749	-0.0041417	(-0.0091888,0.0009053)	0.107709	0.182608	0.178354	2745	0.419113	(0.2698028,0.5684231)	4.08004e-08	2.68511e-07	2.98509e-07	2539	0.0051072	(-0.0685758,0.0787902)	0.891887	0.928718	0.928932	1964	0.963177	(0.9043162,1.0220371)	7.389e-190	5.99741e-188	6.23284e-188	2537
Glutamic acid	NA	NA	glutamic_acid	AMIDE	TRUE	NA	NA	TRUE	1.40743	(1.2723862,1.5567972)	3.12077e-11	2.23502e-10	2.43217e-10	2349	0.0212664	(0.0155988,0.0269339)	2.56649e-13	2.33623e-12	2.5558e-12	2345	0.729325	(0.5592028,0.8994462)	7.49973e-17	1.06638e-15	1.25054e-15	2172	0.411051	(0.3277554,0.4943474)	1.32952e-21	2.12287e-20	2.50859e-20	1696	0.341122	(0.2621903,0.4200548)	4.27237e-17	2.3378e-16	2.51089e-16	2172
N-Acetyl-mannosamine	NA	NA	n_acetyl_l_glutamic_acid	AMIDE	TRUE	NA	NA	TRUE	1.39856	(1.2664915,1.5443943)	3.39873e-11	2.41632e-10	2.63448e-10	2349	0.0171834	(0.0117095,0.0226573)	8.76165e-10	5.38413e-09	5.65955e-09	2345	0.484249	(0.3246705,0.6438274)	3.10114e-09	2.4557e-08	2.71161e-08	2172	0.0902579	(0.0136047,0.1669110)	0.021037	0.0469955	0.045364	1696	0.0014633	(-0.0733424,0.0762689)	0.969404	0.974909	0.976898	2172
PE(32:1)	NA	QI4805	mz690_506_rt5_71	HILIC	FALSE	690.506	5.71	TRUE	1.39404	(1.2630994,1.5385444)	4.07792e-11	2.88865e-10	3.14394e-10	2749	0.0129837	(0.0077397,0.0182277)	1.27264e-06	5.48474e-06	5.62958e-06	2745	0.640618	(0.4843430,0.7968935)	1.38288e-15	1.83255e-14	2.08742e-14	2539	0.266184	(0.1887724,0.3435959)	2.02657e-11	1.45674e-10	1.56242e-10	1964	1.02852	(0.9668240,1.0902075)	7.1397e-196	6.04702e-194	6.39896e-194	2537
NA	NA	QI9072	mz198_0528_rt8_62	HILIC	FALSE	198.053	8.62	TRUE	1.36515	(1.2441267,1.4979386)	4.96576e-11	3.50482e-10	3.80797e-10	2749	0.0049677	(-0.0002890,0.0102244)	0.0639878	0.116712	0.113986	2745	0.0398285	(-0.1140587,0.1937157)	0.611839	0.701508	0.712735	2539	0.0072858	(-0.0671402,0.0817118)	0.847774	0.89656	0.895879	1964	0.102685	(0.0312905,0.1740800)	0.00483502	0.00809855	0.00864516	2537
NA	NA	QI190	mz652_5504_rt1_66	HILIC	FALSE	652.55	1.66	TRUE	1.3774	(1.2516667,1.5157731)	5.52305e-11	3.88408e-10	4.21279e-10	2749	0.0114644	(0.0061122,0.0168165)	2.75279e-05	9.85742e-05	9.77104e-05	2745	0.644106	(0.4872136,0.8009979)	1.25708e-15	1.67725e-14	1.91772e-14	2539	0.203912	(0.1275829,0.2802420)	1.78585e-07	8.34253e-07	8.65172e-07	1964	0.900462	(0.8354347,0.9654884)	1.011e-142	5.04982e-141	6.30337e-141	2537
SM(d18:1_19:1)	NA	QI6335	mz743_6051_rt7_29	HILIC	FALSE	743.605	7.29	TRUE	0.735301	(0.6706989,0.8061254)	5.62685e-11	3.94284e-10	4.26926e-10	2749	0.0073467	(0.0023478,0.0123457)	0.0039858	0.0100574	0.00983759	2745	-0.392523	(-0.5414148,-0.2436315)	2.53004e-07	1.52115e-06	1.68748e-06	2539	-0.072633	(-0.1450229,-0.0002431)	0.0492364	0.098574	0.0955413	1964	-0.313217	(-0.3816632,-0.2447717)	5.46783e-19	3.25729e-18	3.56403e-18	2537
NA	NA	QI2240	mz615_2442_rt2_51	HILIC	FALSE	615.244	2.51	TRUE	0.746603	(0.6839345,0.8150141)	6.45402e-11	4.49015e-10	4.87109e-10	2749	-0.0036808	(-0.0089832,0.0016216)	0.173574	0.27224	0.267352	2745	-0.120354	(-0.2757395,0.0350320)	0.128935	0.203538	0.209155	2539	-0.189314	(-0.2658877,-0.1127404)	1.34104e-06	5.64222e-06	5.77493e-06	1964	-0.0675561	(-0.1396782,0.0045659)	0.0663624	0.0932713	0.0980059	2537
NA	NA	QI8972	mz144_1017_rt8_8	HILIC	FALSE	144.102	8.8	TRUE	1.32897	(1.2199732,1.4477048)	7.32636e-11	5.07891e-10	5.50052e-10	2749	0.0172315	(0.0120356,0.0224273)	9.33073e-11	6.1824e-10	6.65685e-10	2745	0.280431	(0.1270000,0.4338625)	0.000344755	0.00109564	0.00114713	2539	0.137321	(0.0645353,0.2101064)	0.000221502	0.00070097	0.000698601	1964	0.22724	(0.1563722,0.2981072)	3.78219e-10	1.2118e-09	1.32826e-09	2537
NA	NA	QI448	mz477_3566_rt1_78	HILIC	FALSE	477.357	1.78	TRUE	0.754405	(0.6930190,0.8212280)	7.60156e-11	5.25101e-10	5.67742e-10	2749	-0.0003158	(-0.0055964,0.0049647)	0.906645	0.942979	0.94129	2745	-0.254665	(-0.4051918,-0.1041377)	0.000921125	0.00268214	0.00283453	2539	0.0512869	(-0.0144566,0.1170304)	0.126196	0.22008	0.215949	1964	-0.133448	(-0.2033208,-0.0635760)	0.000184344	0.000364571	0.00039221	2537
NA	NA	QI3999	mz281_1129_rt4_92	HILIC	FALSE	281.113	4.92	TRUE	1.3614	(1.2403701,1.4942366)	8.32061e-11	5.70724e-10	6.18226e-10	2749	0.0100741	(0.0051869,0.0149613)	5.44839e-05	0.000188182	0.000184704	2745	0.135544	(-0.0079866,0.2790749)	0.0641725	0.112823	0.117828	2539	0.14453	(0.0786235,0.2104365)	1.78575e-05	6.56347e-05	6.66866e-05	1964	0.224417	(0.1582543,0.2905805)	3.55057e-11	1.2373e-10	1.35774e-10	2537
NA	NA	QI12988	mz458_202_rt3_91	HILIC	FALSE	458.202	3.91	TRUE	1.36206	(1.2406600,1.4953470)	8.74303e-11	5.95504e-10	6.46263e-10	2749	0.0121955	(0.0068873,0.0175036)	6.91638e-06	2.68078e-05	2.71212e-05	2745	0.185946	(0.0292093,0.3426820)	0.0200793	0.0416555	0.044298	2539	0.208735	(0.1331168,0.2843542)	6.93687e-08	3.41238e-07	3.55267e-07	1964	0.186829	(0.1142433,0.2594140)	4.80166e-07	1.17013e-06	1.27612e-06	2537
NA	NA	QI6347	mz727_5726_rt7_33	HILIC	FALSE	727.573	7.33	TRUE	0.730798	(0.6643672,0.8038715)	1.11999e-10	7.57549e-10	8.23623e-10	2749	0.0078306	(0.0027718,0.0128895)	0.0024265	0.00651975	0.00639633	2745	-0.358749	(-0.5080691,-0.2094278)	2.59644e-06	1.35237e-05	1.43757e-05	2539	-0.060809	(-0.1343662,0.0127483)	0.105118	0.189426	0.185183	1964	-0.19629	(-0.2655040,-0.1270759)	2.96199e-08	7.99163e-08	8.94209e-08	2537
NA	NA	QI9680	mz142_0861_rt7_62	HILIC	FALSE	142.086	7.62	TRUE	1.32871	(1.2185257,1.4488510)	1.23557e-10	8.29962e-10	9.03983e-10	2749	0.0122151	(0.0068507,0.0175795)	8.33266e-06	3.20158e-05	3.22947e-05	2745	0.316217	(0.1566214,0.4758136)	0.000104843	0.000377512	0.000392545	2539	0.17209	(0.0935544,0.2506261)	1.81291e-05	6.65075e-05	6.7525e-05	1964	0.225262	(0.1514357,0.2990876)	2.49735e-09	7.44998e-09	8.17626e-09	2537
SM(d18:1_16:0)	HMDB0010169	QI9811	mz725_5555_rt7_41	HILIC	FALSE	725.556	7.41	TRUE	0.744508	(0.6804363,0.8146131)	1.31211e-10	8.78347e-10	9.53878e-10	2749	-0.0112374	(-0.0165079,-0.0059670)	2.99635e-05	0.000106707	0.000105572	2745	-0.408078	(-0.5639593,-0.2521972)	3.06134e-07	1.80712e-06	2.00455e-06	2539	-0.281124	(-0.3558487,-0.2063993)	2.35778e-13	1.97972e-12	2.15354e-12	1964	-0.374319	(-0.4455706,-0.3030682)	2.08608e-24	1.57507e-23	1.74938e-23	2537
NA	NA	QI9607	mz630_4244_rt7_73	HILIC	FALSE	630.424	7.73	TRUE	0.755194	(0.6932039,0.8227275)	1.31707e-10	8.78648e-10	9.53878e-10	2749	-0.012501	(-0.0178406,-0.0071614)	4.61768e-06	1.83576e-05	1.86528e-05	2745	-0.533098	(-0.6907270,-0.3754698)	4.04043e-11	3.74798e-10	4.13855e-10	2539	-0.271648	(-0.3474428,-0.1958531)	2.8644e-12	2.23194e-11	2.38811e-11	1964	-0.272788	(-0.3458475,-0.1997281)	3.27661e-13	1.31334e-12	1.41953e-12	2537
NA	NA	QI574	mz402_2636_rt1_82	HILIC	FALSE	402.264	1.82	TRUE	0.764138	(0.7039145,0.8295137)	1.33924e-10	8.90389e-10	9.6506e-10	2749	0.0003457	(-0.0050366,0.0057279)	0.899788	0.939329	0.939041	2745	-0.260524	(-0.4128361,-0.1082109)	0.000808165	0.00237733	0.00251688	2539	0.0847161	(0.0189643,0.1504680)	0.0115881	0.0274285	0.0266303	1964	-0.0964811	(-0.1674106,-0.0255516)	0.00769514	0.0124918	0.013263	2537
NA	NA	QI6891	mz492_0783_rt8_2	HILIC	FALSE	492.078	8.2	TRUE	0.740934	(0.6760288,0.8120703)	1.45075e-10	9.61245e-10	1.04019e-09	2749	-0.0078482	(-0.0131112,-0.0025851)	0.00348426	0.0089661	0.00878107	2745	-0.438532	(-0.5951854,-0.2818779)	4.43652e-08	2.89042e-07	3.22943e-07	2539	-0.0936365	(-0.1702800,-0.0169930)	0.0166686	0.0379771	0.0366607	1964	-0.0387678	(-0.1120718,0.0345362)	0.299813	0.371052	0.383183	2537
UDP-GlcNAc	NA	NA	udp_glcnac	AMIDE	TRUE	NA	NA	TRUE	1.3993	(1.2623731,1.5510871)	1.61237e-10	1.06471e-09	1.15032e-09	2247	0.0181723	(0.0122726,0.0240721)	1.79595e-09	1.05377e-08	1.11489e-08	2244	0.825292	(0.6551259,0.9954587)	5.03414e-21	9.61422e-20	1.12796e-19	2073	0.442137	(0.3549005,0.5293744)	1.25342e-22	2.1997e-21	2.56772e-21	1584	0.491718	(0.4124068,0.5710292)	6.67322e-33	7.34431e-32	8.10966e-32	2071
NA	NA	QI15829	mz435_383_rt1_75	HILIC	FALSE	435.383	1.75	TRUE	0.74657	(0.6823925,0.8167833)	1.85403e-10	1.21196e-09	1.31618e-09	2749	-0.006552	(-0.0117066,-0.0013975)	0.0127459	0.0282469	0.0275681	2745	-0.289521	(-0.4340201,-0.1450210)	8.76248e-05	0.00032575	0.00033869	2539	-0.0289135	(-0.0968081,0.0389812)	0.403717	0.536453	0.53754	1964	-0.215425	(-0.2822100,-0.1486401)	2.98051e-10	9.67672e-10	1.0632e-09	2537
Linoleic acid	NA	NA	linoleic_acid	AMIDE	TRUE	NA	NA	TRUE	0.666959	(0.5887522,0.7555550)	1.95581e-10	1.26997e-09	1.38159e-09	1702	0.0028812	(-0.0030710,0.0088333)	0.342547	0.473585	0.466932	1697	-0.136418	(-0.3226516,0.0498164)	0.150977	0.231943	0.237652	1592	-0.0877081	(-0.1683458,-0.0070704)	0.0330459	0.0698951	0.0671216	1290	-0.152148	(-0.2315958,-0.0727005)	0.000178653	0.000354756	0.000381801	1590
NA	NA	QI5469	mz304_23_rt6_13	HILIC	FALSE	304.23	6.13	TRUE	1.3841	(1.2515994,1.5306173)	2.43164e-10	1.56849e-09	1.7093e-09	2749	0.0176882	(0.0123767,0.0229997)	7.81619e-11	5.28678e-10	5.74791e-10	2745	0.540362	(0.3899087,0.6908148)	2.41911e-12	2.46724e-11	2.75318e-11	2539	0.147641	(0.0746994,0.2205817)	7.45831e-05	0.000255339	0.000255866	1964	0.137719	(0.0673775,0.2080613)	0.000126478	0.000254261	0.000273147	2537
NA	NA	QI15514	mz403_3202_rt1_84	HILIC	FALSE	403.32	1.84	TRUE	0.76232	(0.7008729,0.8291546)	2.46326e-10	1.58364e-09	1.72222e-09	2749	-0.0087341	(-0.0140413,-0.0034270)	0.00126571	0.00354253	0.00350392	2745	-0.302124	(-0.4539543,-0.1502937)	9.79036e-05	0.000357146	0.000371412	2539	0.0277611	(-0.0387606,0.0942827)	0.413202	0.545707	0.547626	1964	-0.240903	(-0.3109847,-0.1708206)	1.94801e-11	6.93734e-11	7.59089e-11	2537
NA	NA	QI9726	mz683_5082_rt7_55	HILIC	FALSE	683.508	7.55	TRUE	0.753309	(0.6900364,0.8223840)	2.47404e-10	1.58534e-09	1.72222e-09	2749	-2.23e-05	(-0.0052232,0.0051787)	0.993303	0.995839	0.995385	2745	-0.348749	(-0.5013702,-0.1961269)	7.76788e-06	3.59007e-05	3.78054e-05	2539	0.0286928	(-0.0447613,0.1021469)	0.443721	0.573569	0.575816	1964	-0.0428446	(-0.1139418,0.0282526)	0.237444	0.30133	0.311808	2537
Methionine	HMDB0000696	TF35	methionine	HILIC	TRUE	150.058	7.23	TRUE	0.737313	(0.6709004,0.8103010)	2.48918e-10	1.58981e-09	1.72439e-09	2749	-0.0061204	(-0.0111676,-0.0010732)	0.0174857	0.037631	0.0365856	2745	-0.267792	(-0.4118519,-0.1237313)	0.000272673	0.000895729	0.0009422	2539	0.0467141	(-0.0225053,0.1159335)	0.185811	0.299636	0.294749	1964	-0.105344	(-0.1723514,-0.0383361)	0.002073	0.00364459	0.00387573	2537
NA	NA	QI10664	mz221_0453_rt6_18	HILIC	FALSE	221.045	6.18	TRUE	1.34503	(1.2261215,1.4754704)	3.46047e-10	2.18155e-09	2.37431e-09	2749	0.0061297	(0.0009114,0.0113479)	0.0213365	0.0448366	0.0435848	2745	0.384626	(0.2300888,0.5391638)	1.1241e-06	6.23859e-06	6.83034e-06	2539	0.114312	(0.0397348,0.1888897)	0.00267996	0.00722069	0.00712999	1964	0.234939	(0.1634106,0.3064672)	1.41832e-10	4.72288e-10	5.20172e-10	2537
NA	NA	QI563	mz483_3683_rt1_82	HILIC	FALSE	483.368	1.82	TRUE	0.760467	(0.6981504,0.8283458)	3.44881e-10	2.18126e-09	2.37431e-09	2749	-0.003086	(-0.0083043,0.0021322)	0.246305	0.367102	0.363002	2745	-0.210487	(-0.3599909,-0.0609826)	0.00580842	0.0136817	0.0145363	2539	0.0830971	(0.0157847,0.1504094)	0.0155652	0.0356718	0.0344984	1964	-0.214323	(-0.2834160,-0.1452297)	1.36159e-09	4.16386e-09	4.54074e-09	2537
NA	NA	QI618	mz459_3692_rt1_83	HILIC	FALSE	459.369	1.83	TRUE	0.761438	(0.6992869,0.8291133)	3.52866e-10	2.21023e-09	2.40957e-09	2749	-0.0026455	(-0.0078907,0.0025996)	0.322754	0.455928	0.451101	2745	-0.253694	(-0.4038115,-0.1035767)	0.000933103	0.00271296	0.00286525	2539	0.0497674	(-0.0182435,0.1177784)	0.151417	0.256487	0.251601	1964	-0.167334	(-0.2369263,-0.0977413)	2.54879e-06	5.91781e-06	6.4348e-06	2537
NA	NA	QI3774	mz290_2068_rt4_73	HILIC	FALSE	290.207	4.73	TRUE	0.762026	(0.6998366,0.8297417)	3.92851e-10	2.44496e-09	2.6699e-09	2749	0.0037134	(-0.0016562,0.0090831)	0.175201	0.274524	0.269451	2745	-0.375635	(-0.5323060,-0.2189642)	2.7214e-06	1.40992e-05	1.49498e-05	2539	-0.0433144	(-0.1170765,0.0304477)	0.249611	0.373522	0.369393	1964	-0.0518015	(-0.1247994,0.0211964)	0.164192	0.214374	0.222544	2537
NA	NA	QI9897	mz184_0733_rt7_18	HILIC	FALSE	184.073	7.18	TRUE	0.744423	(0.6786411,0.8165820)	4.03682e-10	2.49642e-09	2.71775e-09	2749	0.0051897	(0.0000814,0.0102980)	0.0464637	0.0885629	0.0865311	2745	-0.397153	(-0.5481038,-0.2462028)	2.67258e-07	1.6019e-06	1.7743e-06	2539	-0.181738	(-0.2541060,-0.1093695)	9.13967e-07	3.95646e-06	4.07028e-06	1964	-0.313638	(-0.3829396,-0.2443355)	1.3011e-18	7.65723e-18	8.36671e-18	2537
NA	NA	QI13988	mz314_2686_rt2_5	HILIC	FALSE	314.269	2.5	TRUE	0.751487	(0.6871134,0.8218921)	4.03299e-10	2.49642e-09	2.71775e-09	2749	0.0025935	(-0.0026411,0.0078280)	0.331392	0.463758	0.45826	2745	-0.0244055	(-0.1728999,0.1240890)	0.747268	0.810511	0.819253	2539	-0.0201655	(-0.0918079,0.0514768)	0.580996	0.693795	0.696333	1964	-0.0444321	(-0.1133950,0.0245308)	0.206566	0.264905	0.274274	2537
NA	NA	QI1622	mz357_2785_rt2_1	HILIC	FALSE	357.279	2.1	TRUE	1.3437	(1.2247194,1.4742284)	4.22752e-10	2.60608e-09	2.83283e-09	2749	0.0057801	(0.0004390,0.0111212)	0.0339286	0.0672359	0.0655709	2745	0.493981	(0.3373989,0.6505636)	7.16435e-10	6.09439e-09	6.67122e-09	2539	0.280922	(0.2037499,0.3580932)	1.31798e-12	1.04793e-11	1.12499e-11	1964	0.279968	(0.2074134,0.3525218)	5.32856e-14	2.25163e-13	2.44909e-13	2537
NA	NA	QI6896	mz222_9881_rt8_2	HILIC	FALSE	222.988	8.2	TRUE	0.737595	(0.6701240,0.8118590)	5.02496e-10	3.08789e-09	3.35153e-09	2749	-0.0104776	(-0.0157753,-0.0051799)	0.000107766	0.000358239	0.000354441	2745	-0.387448	(-0.5457070,-0.2291891)	1.67344e-06	9.00514e-06	9.71544e-06	2539	-0.0294721	(-0.1089127,0.0499685)	0.466953	0.594572	0.597913	1964	-0.190062	(-0.2636864,-0.1164375)	4.44493e-07	1.09189e-06	1.19364e-06	2537
NA	NA	QI15545	mz161_1324_rt1_83	HILIC	FALSE	161.132	1.83	TRUE	0.749748	(0.6845399,0.8211665)	5.50155e-10	3.37013e-09	3.65242e-09	2749	0.0003446	(-0.0047338,0.0054230)	0.894171	0.934968	0.93526	2745	-0.254512	(-0.4040811,-0.1049434)	0.000859887	0.00251889	0.00266324	2539	0.0226297	(-0.0482059,0.0934654)	0.531038	0.651835	0.654217	1964	-0.230964	(-0.3000422,-0.1618868)	6.65893e-11	2.27572e-10	2.51287e-10	2537
NA	NA	QI12471	mz134_0448_rt4_7	HILIC	FALSE	134.045	4.7	TRUE	0.75387	(0.6894565,0.8243011)	5.64657e-10	3.43735e-09	3.73142e-09	2749	-0.0116581	(-0.0170123,-0.0063040)	2.02549e-05	7.37506e-05	7.3533e-05	2745	-0.708532	(-0.8657952,-0.5512695)	1.83708e-18	3.03274e-17	3.5125e-17	2539	-0.156687	(-0.2329115,-0.0804626)	5.75696e-05	0.00020026	0.000200376	1964	-0.100252	(-0.1743387,-0.0261650)	0.00801773	0.0130046	0.0138024	2537
Thiamine	HMDB0000235	QI8646	thiamine	HILIC	TRUE	265.111	10.01	TRUE	1.36	(1.2335180,1.4994411)	6.6578e-10	4.02776e-09	4.37949e-09	2749	-0.0015858	(-0.0068606,0.0036889)	0.55557	0.668882	0.666127	2745	0.194425	(0.0387286,0.3501209)	0.014406	0.0309333	0.0327908	2539	0.0116097	(-0.0670291,0.0902486)	0.772202	0.846305	0.848535	1964	0.0482155	(-0.0242402,0.1206713)	0.192053	0.247761	0.256907	2537
NA	NA	QI4755	mz730_537_rt5_67	HILIC	FALSE	730.537	5.67	TRUE	1.36473	(1.2363398,1.5064634)	6.89716e-10	4.15965e-09	4.51622e-09	2749	-0.0086646	(-0.0138841,-0.0034451)	0.00114739	0.00325344	0.00321988	2745	0.267319	(0.1126403,0.4219976)	0.000712544	0.00213544	0.00226059	2539	-0.020015	(-0.0970050,0.0569750)	0.610217	0.716518	0.71716	1964	0.841217	(0.7769330,0.9055008)	2.8227e-129	1.24969e-127	1.55683e-127	2537
Bilirubin	HMDB0000054	QI15751	bilirubin	HILIC	TRUE	585.27	1.78	TRUE	0.757298	(0.6932415,0.8272736)	7.0417e-10	4.23371e-09	4.58991e-09	2749	-0.0216854	(-0.0268565,-0.0165144)	3.03021e-16	3.62138e-15	3.98653e-15	2745	-0.296948	(-0.4518320,-0.1420636)	0.000174112	0.000601366	0.000625756	2539	-0.19334	(-0.2680749,-0.1186051)	4.27267e-07	1.91778e-06	1.98158e-06	1964	-0.0986733	(-0.1706376,-0.0267091)	0.00722059	0.0117902	0.0125355	2537
CAR(4:0(OH))	HMDB0013127	QI7316	c4_oh_carnitine	HILIC	TRUE	248.149	9.09	TRUE	1.34364	(1.2231193,1.4760440)	7.26301e-10	4.34834e-09	4.71274e-09	2749	0.0138008	(0.0087555,0.0188460)	8.83461e-08	4.31324e-07	4.52458e-07	2745	0.465081	(0.3158911,0.6142699)	1.12967e-09	9.36424e-09	1.02528e-08	2539	-0.145803	(-0.2185659,-0.0730409)	8.79474e-05	0.000298619	0.000298297	1964	0.0258901	(-0.0438961,0.0956763)	0.467	0.539571	0.551175	2537
NA	NA	QI6840	mz615_3355_rt8_12	HILIC	FALSE	615.336	8.12	TRUE	0.765377	(0.7028530,0.8334621)	7.76832e-10	4.62773e-09	5.01791e-09	2749	-0.0169395	(-0.0222363,-0.0116428)	4.15702e-10	2.62918e-09	2.79867e-09	2745	-0.643132	(-0.8004863,-0.4857782)	1.67051e-15	2.184e-14	2.4696e-14	2539	-0.27265	(-0.3458402,-0.1994596)	3.99166e-13	3.26712e-12	3.53336e-12	1964	-0.439389	(-0.5113574,-0.3674203)	3.62185e-32	3.89799e-31	4.32811e-31	2537
SM(d18:1/16:0)	HMDB0010169	QI6375	c16_0_sm	HILIC	TRUE	703.574	7.39	TRUE	0.755399	(0.6902981,0.8266398)	1.05784e-09	6.26344e-09	6.80243e-09	2749	-0.0060288	(-0.0112747,-0.0007829)	0.0243075	0.0503199	0.0490253	2745	-0.367692	(-0.5221641,-0.2132198)	3.20679e-06	1.63103e-05	1.72877e-05	2539	-0.258265	(-0.3319916,-0.1845380)	8.59418e-12	6.43902e-11	6.88495e-11	1964	-0.389817	(-0.4601781,-0.3194556)	6.65685e-27	5.58946e-26	6.23917e-26	2537
NA	NA	QI12380	mz304_1289_rt4_77	HILIC	FALSE	304.129	4.77	TRUE	1.34068	(1.2200635,1.4732227)	1.09341e-09	6.43493e-09	6.99978e-09	2749	0.0183461	(0.0132683,0.0234238)	1.76639e-12	1.45187e-11	1.61338e-11	2745	0.25037	(0.0986810,0.4020584)	0.00122537	0.00344447	0.00365318	2539	0.316516	(0.2455439,0.3874871)	4.65108e-18	5.88331e-17	6.60361e-17	1964	0.303469	(0.2338722,0.3730657)	2.08983e-17	1.1732e-16	1.26448e-16	2537
NA	NA	QI4680	mz183_1128_rt5_61	HILIC	FALSE	183.113	5.61	TRUE	1.32618	(1.2109032,1.4524354)	1.16885e-09	6.85819e-09	7.44947e-09	2749	0.0024619	(-0.0026031,0.0075270)	0.340625	0.471597	0.465196	2745	0.131874	(-0.0163378,0.2800863)	0.0811505	0.137104	0.14261	2539	-0.0633409	(-0.1314302,0.0047485)	0.0682429	0.131676	0.127642	1964	0.217343	(0.1489484,0.2857375)	5.40025e-10	1.70774e-09	1.86601e-09	2537
LPE(16:0)	HMDB0011503	QI10294	c16_0_lpe	HILIC	TRUE	454.293	6.47	TRUE	1.32667	(1.2110738,1.4532990)	1.22278e-09	7.13166e-09	7.7587e-09	2749	-0.0068335	(-0.0120777,-0.0015893)	0.0106694	0.0242238	0.0236475	2745	0.201376	(0.0447314,0.3580208)	0.011768	0.0258737	0.0273455	2539	-0.149812	(-0.2258589,-0.0737654)	0.0001154	0.000383616	0.000382179	1964	0.708187	(0.6408271,0.7755477)	2.02104e-87	6.90699e-86	7.8329e-86	2537
NA	NA	QI7633	mz198_1238_rt10_55	HILIC	FALSE	198.124	10.55	TRUE	1.31941	(1.2064531,1.4429442)	1.27861e-09	7.41289e-09	8.07721e-09	2749	0.0102175	(0.0048566,0.0155784)	0.000189885	0.000612681	0.000609431	2745	0.4424	(0.2827628,0.6020371)	6.02881e-08	3.8632e-07	4.32266e-07	2539	0.125546	(0.0485940,0.2024986)	0.00139809	0.00397588	0.00394658	1964	0.213934	(0.1398913,0.2879765)	1.62978e-08	4.4969e-08	5.00451e-08	2537
NA	NA	QI6377	mz343_787_rt7_39	HILIC	FALSE	343.787	7.39	TRUE	0.760728	(0.6963495,0.8310574)	1.3456e-09	7.75511e-09	8.46312e-09	2749	-0.0130005	(-0.0182935,-0.0077074)	1.54403e-06	6.48226e-06	6.64907e-06	2745	-0.363252	(-0.5204075,-0.2060964)	6.10077e-06	2.8706e-05	3.00636e-05	2539	-0.270481	(-0.3442392,-0.1967232)	9.0523e-13	7.34745e-12	7.9638e-12	1964	-0.391966	(-0.4635352,-0.3203977)	2.43098e-26	1.99812e-25	2.23463e-25	2537
Histidine	HMDB0000177	QI8769	histidine	HILIC	TRUE	156.077	9.57	TRUE	0.755339	(0.6897738,0.8271357)	1.39124e-09	7.9945e-09	8.71196e-09	2749	-0.0204715	(-0.0257438,-0.0151992)	3.64282e-14	3.54811e-13	3.95743e-13	2745	-0.349143	(-0.5063687,-0.1919165)	1.38697e-05	6.00404e-05	6.31402e-05	2539	-0.159507	(-0.2326505,-0.0863629)	1.98731e-05	7.25389e-05	7.34921e-05	1964	-0.031412	(-0.1047233,0.0418992)	0.400877	0.476745	0.488409	2537
NA	NA	QI15544	mz563_429_rt1_83	HILIC	FALSE	563.429	1.83	TRUE	0.76258	(0.6985280,0.8325046)	1.40128e-09	8.02851e-09	8.73668e-09	2749	1.35e-05	(-0.0051628,0.0051897)	0.995931	0.996955	0.996626	2745	-0.26017	(-0.4036547,-0.1166848)	0.000384106	0.00121074	0.00126623	2539	0.0325467	(-0.0345212,0.0996147)	0.341356	0.472609	0.472951	1964	-0.171451	(-0.2379694,-0.1049327)	4.62995e-07	1.13306e-06	1.23868e-06	2537
NA	HMDB0004971	QI2689	mz700_5713_rt3_03	HILIC	FALSE	700.571	3.03	TRUE	0.760672	(0.6961870,0.8311305)	1.42643e-09	8.14864e-09	8.85498e-09	2749	-0.0010067	(-0.0063813,0.0043680)	0.713455	0.793271	0.792482	2745	-0.339474	(-0.4982278,-0.1807196)	2.84593e-05	0.000116224	0.00012146	2539	-0.113532	(-0.1907840,-0.0362804)	0.00399188	0.0104659	0.0102956	1964	-0.309913	(-0.3828905,-0.2369352)	1.33596e-16	7.03365e-16	7.54239e-16	2537
Carotene	NA	QI15953	mz536_4354_rt1_69	HILIC	FALSE	536.435	1.69	TRUE	0.765031	(0.7013725,0.8344679)	1.51784e-09	8.62027e-09	9.38182e-09	2749	-0.0269358	(-0.0322102,-0.0216614)	3.30712e-23	8.82503e-22	9.29884e-22	2745	-0.635339	(-0.7931445,-0.4775343)	4.2916e-15	5.4286e-14	6.09322e-14	2539	-0.418676	(-0.4948173,-0.3425356)	2.21993e-26	4.9706e-25	6.00638e-25	1964	-0.583436	(-0.6539358,-0.5129363)	2.03941e-56	4.36568e-55	4.71696e-55	2537
NA	NA	NA	oleoyl_serine	AMIDE	TRUE	NA	NA	TRUE	0.740725	(0.6720028,0.8164743)	1.52715e-09	8.64793e-09	9.39885e-09	2349	0.0061848	(0.0004815,0.0118881)	0.0335639	0.0666488	0.0650414	2345	-0.145125	(-0.3134387,0.0231894)	0.0910045	0.152169	0.1578	2172	-0.211225	(-0.2924185,-0.1300309)	3.72998e-07	1.68194e-06	1.74228e-06	1696	-0.337728	(-0.4146629,-0.2607922)	1.39756e-17	7.96037e-17	8.60129e-17	2172
NA	NA	QI10330	mz245_0953_rt6_42	HILIC	FALSE	245.095	6.42	TRUE	1.32076	(1.2067052,1.4455844)	1.5628e-09	8.82416e-09	9.57716e-09	2749	0.0086521	(0.0035886,0.0137155)	0.000817495	0.00237684	0.00236348	2745	0.209795	(0.0652223,0.3543674)	0.00446927	0.0109511	0.0117165	2539	0.0545757	(-0.0130038,0.1221551)	0.1134	0.200275	0.195922	1964	0.244219	(0.1776276,0.3108104)	8.40183e-13	3.24737e-12	3.52287e-12	2537
NA	NA	QI12489	mz198_0432_rt4_69	HILIC	FALSE	198.043	4.69	TRUE	1.43252	(1.2746131,1.6099870)	1.6202e-09	9.09553e-09	9.84477e-09	2749	0.0179706	(0.0127418,0.0231995)	1.93673e-11	1.42907e-10	1.58701e-10	2745	0.25299	(0.0975497,0.4084308)	0.00143267	0.00394187	0.00416724	2539	0.228957	(0.1568048,0.3011095)	5.93775e-10	3.79237e-09	3.96034e-09	1964	0.332591	(0.2613646,0.4038164)	1.07482e-19	6.56348e-19	7.2023e-19	2537
NA	NA	QI961	mz480_2126_rt1_93	HILIC	FALSE	480.213	1.93	TRUE	0.765202	(0.7014734,0.8347195)	1.61982e-09	9.09553e-09	9.84477e-09	2749	-0.0056518	(-0.0109567,-0.0003470)	0.0367902	0.0723912	0.0705309	2745	-0.0936019	(-0.2485573,0.0613535)	0.236328	0.329304	0.336539	2539	-0.105385	(-0.1799451,-0.0308257)	0.00562402	0.0143023	0.0140015	1964	-0.108872	(-0.1807666,-0.0369772)	0.00301146	0.00518227	0.00551524	2537
NA	HMDB0000305	QI722	mz269_226_rt1_85	HILIC	FALSE	269.226	1.85	TRUE	1.33267	(1.2138934,1.4630678)	1.64369e-09	9.20089e-09	9.94536e-09	2749	-0.0035262	(-0.0087045,0.0016522)	0.181916	0.283725	0.278705	2745	0.196297	(0.0442590,0.3483358)	0.0114102	0.0251991	0.0266337	2539	0.184694	(0.1109822,0.2584057)	9.66689e-07	4.16617e-06	4.27849e-06	1964	0.669822	(0.6041426,0.7355012)	1.00488e-82	3.20903e-81	3.60249e-81	2537
NA	NA	QI4687	mz762_5041_rt5_62	HILIC	FALSE	762.504	5.62	TRUE	1.36322	(1.2321637,1.5082102)	1.87528e-09	1.04373e-08	1.12517e-08	2749	-0.0006715	(-0.0058331,0.0044901)	0.798678	0.864347	0.862428	2745	0.396841	(0.2431259,0.5505569)	4.43771e-07	2.57282e-06	2.84093e-06	2539	-0.0166145	(-0.0937075,0.0604785)	0.672592	0.769354	0.769136	1964	0.739696	(0.6739742,0.8054176)	7.23048e-99	2.70865e-97	3.14197e-97	2537
NA	NA	QI596	mz449_3262_rt1_82	HILIC	FALSE	449.326	1.82	TRUE	0.771988	(0.7094969,0.8399833)	1.87019e-09	1.04373e-08	1.12517e-08	2749	-0.0059929	(-0.0113262,-0.0006596)	0.0276543	0.0559404	0.0546983	2745	-0.283595	(-0.4364574,-0.1307328)	0.000280328	0.0009137	0.00095767	2539	-0.0328221	(-0.1001674,0.0345233)	0.339282	0.470461	0.471042	1964	-0.243204	(-0.3138231,-0.1725853)	1.788e-11	6.39087e-11	6.98635e-11	2537
NA	NA	QI409	mz495_4046_rt1_77	HILIC	FALSE	495.405	1.77	TRUE	0.765901	(0.7018777,0.8357649)	2.12297e-09	1.17822e-08	1.26847e-08	2749	-0.0024729	(-0.0075901,0.0026444)	0.343439	0.474145	0.46726	2745	-0.25223	(-0.3990792,-0.1053802)	0.000768313	0.00228192	0.00241545	2539	0.0564446	(-0.0120536,0.1249429)	0.106241	0.190857	0.186474	1964	-0.209238	(-0.2771688,-0.1413070)	1.76907e-09	5.34287e-09	5.84527e-09	2537
NA	NA	QI12706	mz522_1794_rt4_39	HILIC	FALSE	522.179	4.39	TRUE	0.766112	(0.7020549,0.8360139)	2.22626e-09	1.22854e-08	1.32467e-08	2749	-0.0177131	(-0.0229082,-0.0125180)	2.7758e-11	1.98068e-10	2.18709e-10	2745	-0.471604	(-0.6251723,-0.3180364)	1.97416e-09	1.60236e-08	1.75835e-08	2539	-0.215521	(-0.2882076,-0.1428350)	7.06146e-09	3.97564e-08	4.16713e-08	1964	-0.262658	(-0.3337840,-0.1915328)	5.86472e-13	2.30332e-12	2.50298e-12	2537
NA	NA	QI15557	mz321_2784_rt1_83	HILIC	FALSE	321.278	1.83	TRUE	0.775892	(0.7138219,0.8433590)	2.45247e-09	1.34575e-08	1.45324e-08	2749	-0.0058597	(-0.0111691,-0.0005503)	0.030545	0.0609024	0.0594322	2745	-0.329286	(-0.4835034,-0.1750687)	2.92403e-05	0.000119163	0.000124423	2539	0.0072114	(-0.0643573,0.0787801)	0.843369	0.894329	0.893859	1964	-0.184714	(-0.2562099,-0.1132179)	4.3531e-07	1.0734e-06	1.17337e-06	2537
NA	NA	QI13644	mz266_1021_rt2_83	HILIC	FALSE	266.102	2.83	TRUE	1.32344	(1.2069643,1.4511608)	2.49382e-09	1.3646e-08	1.47166e-08	2749	0.008242	(0.0032129,0.0132710)	0.00132635	0.00369104	0.00365064	2745	0.119348	(-0.0281055,0.2668021)	0.112605	0.182188	0.18842	2539	0.141517	(0.0735750,0.2094596)	4.58643e-05	0.000161562	0.000162394	1964	0.0918667	(0.0234001,0.1603334)	0.00856287	0.0138542	0.014688	2537
Serine	HMDB0000187	QI6688	mz181_9615_rt7_82	HILIC	FALSE	181.962	7.82	TRUE	0.766363	(0.7018082,0.8368554)	3.08613e-09	1.66994e-08	1.81373e-08	2749	-0.0231814	(-0.0284363,-0.0179265)	8.62133e-18	1.23488e-16	1.28781e-16	2745	-0.227799	(-0.3858861,-0.0697126)	0.00475598	0.0114946	0.0122663	2539	-0.34921	(-0.4241779,-0.2742423)	1.57888e-19	2.24501e-18	2.57286e-18	1964	-0.649666	(-0.7187800,-0.5805514)	2.71868e-71	7.25478e-70	7.9563e-70	2537
NA	NA	QI2488	_3_hydroxyhippurate	HILIC	TRUE	196.06	2.75	TRUE	1.30229	(1.1932247,1.4213318)	3.24815e-09	1.75274e-08	1.90116e-08	2749	0.0053135	(0.0000288,0.0105982)	0.0487673	0.0924112	0.0903518	2745	0.0180347	(-0.1364439,0.1725132)	0.818945	0.866543	0.873061	2539	0.0441013	(-0.0298238,0.1180265)	0.242154	0.365671	0.360966	1964	0.130678	(0.0590745,0.2022821)	0.000351815	0.000677879	0.000727998	2537
NA	NA	QI10963	mz769_6213_rt6	HILIC	FALSE	769.621	6	TRUE	0.765744	(0.7008991,0.8365875)	3.37639e-09	1.81691e-08	1.96819e-08	2749	0.0052113	(0.0000082,0.0104144)	0.0496401	0.0935193	0.0913786	2745	-0.3555	(-0.5079235,-0.2030765)	5.02844e-06	2.40673e-05	2.53901e-05	2539	-0.176814	(-0.2474590,-0.1061681)	9.93753e-07	4.27336e-06	4.38474e-06	1964	-0.266474	(-0.3367902,-0.1961583)	1.46394e-13	5.97852e-13	6.45935e-13	2537
NA	HMDB0007031	QI15954	nh4_c36_4_dag_or_tag_fragment	HILIC	TRUE	634.54	1.69	TRUE	1.3111	(1.1975804,1.4353837)	4.57271e-09	2.43378e-08	2.64406e-08	2749	0.005149	(-0.0001841,0.0104820)	0.0584444	0.108222	0.10582	2745	0.577113	(0.4197441,0.7344822)	8.41993e-13	8.86596e-12	9.81641e-12	2539	0.301542	(0.2254642,0.3776189)	1.22502e-14	1.15282e-13	1.2638e-13	1964	1.35239	(1.3006309,1.4041423)	0	0	0	2537
NA	NA	QI2612	mz756_6336_rt2_9	HILIC	FALSE	756.634	2.9	TRUE	0.776187	(0.7131472,0.8447998)	4.56239e-09	2.43378e-08	2.64406e-08	2749	-0.0099773	(-0.0153277,-0.0046269)	0.000260456	0.000826333	0.000822674	2745	-0.211827	(-0.3677071,-0.0559467)	0.00775492	0.0178144	0.0188484	2539	-0.0856204	(-0.1602556,-0.0109852)	0.0245703	0.0536943	0.0517733	1964	-0.108018	(-0.1803763,-0.0356591)	0.00345015	0.00588519	0.00628655	2537
NA	NA	QI5819	mz267_0772_rt6_39	HILIC	FALSE	267.077	6.39	TRUE	1.30711	(1.1951318,1.4295812)	4.60406e-09	2.44379e-08	2.65149e-08	2749	0.0163354	(0.0112966,0.0213742)	2.40418e-10	1.56704e-09	1.67434e-09	2745	0.207044	(0.0610179,0.3530694)	0.00547137	0.0129978	0.0138376	2539	0.0957442	(0.0277858,0.1637025)	0.00578027	0.0146407	0.0143407	1964	0.258295	(0.1910589,0.3255312)	6.85715e-14	2.85422e-13	3.11176e-13	2537
NA	NA	QI862	mz415_3195_rt1_88	HILIC	FALSE	415.32	1.88	TRUE	0.770399	(0.7058250,0.8408815)	5.21803e-09	2.74722e-08	2.99306e-08	2749	-0.0065744	(-0.0119504,-0.0011983)	0.0165561	0.035795	0.0348594	2745	-0.246632	(-0.4049320,-0.0883322)	0.00227334	0.00604156	0.00637959	2539	-0.0608539	(-0.1359446,0.0142368)	0.112143	0.198776	0.194219	1964	-0.21628	(-0.2894795,-0.1430798)	7.73495e-09	2.20969e-08	2.44855e-08	2537
NA	NA	QI4246	mz153_0657_rt5_19	HILIC	FALSE	153.066	5.19	TRUE	1.30176	(1.1911356,1.4226585)	5.88412e-09	3.08956e-08	3.36168e-08	2749	0.0264312	(0.0212472,0.0316151)	3.87046e-23	1.01887e-21	1.06735e-21	2745	0.177082	(0.0230082,0.3311558)	0.0242986	0.0487473	0.0515447	2539	0.19662	(0.1226269,0.2706138)	2.07181e-07	9.58643e-07	9.93637e-07	1964	0.207154	(0.1359449,0.2783627)	1.30282e-08	3.6464e-08	4.03508e-08	2537
CAR(18:2)	HMDB0006469	QI6092	c18_2_carnitine	HILIC	TRUE	424.342	6.84	TRUE	0.766673	(0.7008555,0.8386707)	6.56311e-09	3.43681e-08	3.73472e-08	2749	0.007595	(0.0023674,0.0128227)	0.00442074	0.0110547	0.0107812	2745	-0.385727	(-0.5390148,-0.2324400)	8.56338e-07	4.83521e-06	5.31597e-06	2539	-0.117888	(-0.1922075,-0.0435676)	0.00189238	0.00522887	0.00515907	1964	-0.36548	(-0.4356090,-0.2953514)	4.72735e-24	3.52831e-23	3.91851e-23	2537
NA	NA	QI12147	mz282_2788_rt4_97	HILIC	FALSE	282.279	4.97	TRUE	1.32425	(1.2037870,1.4567753)	7.86252e-09	4.09524e-08	4.45646e-08	2749	0.0020311	(-0.0031755,0.0072377)	0.444389	0.573167	0.567137	2745	0.850535	(0.6993327,1.0017373)	1.14991e-27	3.11115e-26	3.83482e-26	2539	0.0695313	(-0.0028343,0.1418969)	0.0596639	0.117628	0.113729	1964	0.36561	(0.2952568,0.4359629)	6.29585e-24	4.64557e-23	5.159e-23	2537
NA	HMDB0240608	QI6383	mz689_5579_rt7_41	HILIC	FALSE	689.558	7.41	TRUE	0.767656	(0.7015642,0.8399752)	8.59764e-09	4.46619e-08	4.85394e-08	2749	0.0013255	(-0.0039048,0.0065558)	0.619277	0.725843	0.722574	2745	-0.273788	(-0.4276521,-0.1199232)	0.000492656	0.00153306	0.00160561	2539	-0.108167	(-0.1826836,-0.0336499)	0.00446221	0.0115744	0.0113454	1964	-0.282378	(-0.3531130,-0.2116434)	7.22173e-15	3.3575e-14	3.62097e-14	2537
NA	NA	QI7195	mz142_0862_rt8_75	HILIC	TRUE	142.086	8.75	TRUE	1.30276	(1.1901950,1.4259627)	9.66741e-09	4.99526e-08	5.4365e-08	2749	0.0114797	(0.0061104,0.0168491)	2.84892e-05	0.000101643	0.000100624	2745	0.256013	(0.0961273,0.4158989)	0.00170985	0.00466359	0.00491911	2539	0.166986	(0.0875724,0.2463987)	3.88153e-05	0.000137727	0.000138806	1964	0.222278	(0.1483223,0.2962335)	4.2808e-09	1.2521e-08	1.37948e-08	2537
NA	NA	QI12018	mz112_062_rt5_12	HILIC	FALSE	112.062	5.12	TRUE	0.770537	(0.7046201,0.8426205)	1.11062e-08	5.70841e-08	6.22121e-08	2749	-0.0045337	(-0.0099194,0.0008520)	0.0989254	0.169636	0.165723	2745	-0.532717	(-0.6906559,-0.3747781)	4.54728e-11	4.19815e-10	4.62468e-10	2539	-0.0625125	(-0.1393501,0.0143252)	0.110752	0.197388	0.192975	1964	-0.220595	(-0.2940759,-0.1471148)	4.45811e-09	1.30006e-08	1.43019e-08	2537
NA	NA	QI12000	mz192_1052_rt5_13	HILIC	FALSE	192.105	5.13	TRUE	1.33433	(1.2085196,1.4732413)	1.14141e-08	5.85123e-08	6.3688e-08	2749	0.0054143	(0.0001480,0.0106805)	0.0439023	0.0845912	0.082511	2745	0.121856	(-0.0338911,0.2776036)	0.125105	0.198456	0.204329	2539	-0.0185275	(-0.0956293,0.0585744)	0.637502	0.739498	0.740207	1964	0.0063652	(-0.0659907,0.0787212)	0.863057	0.891429	0.897479	2537
NA	NA	QI333	mz628_5143_rt1_74	HILIC	FALSE	628.514	1.74	TRUE	0.767833	(0.7010931,0.8409272)	1.23939e-08	6.33683e-08	6.8887e-08	2749	-0.0068386	(-0.0118246,-0.0018526)	0.00720172	0.0170461	0.0165501	2745	-0.321933	(-0.4652329,-0.1786326)	1.10035e-05	4.87155e-05	5.13975e-05	2539	-0.0359289	(-0.1051010,0.0332433)	0.308491	0.439284	0.438865	1964	-0.243885	(-0.3100309,-0.1777382)	6.36993e-13	2.48172e-12	2.69454e-12	2537
NA	NA	QI1568	mz333_1441_rt2_1	HILIC	FALSE	333.144	2.1	TRUE	0.770945	(0.7047651,0.8433397)	1.34115e-08	6.82131e-08	7.42552e-08	2749	-0.004166	(-0.0093916,0.0010596)	0.118116	0.196658	0.192475	2745	-0.223874	(-0.3811236,-0.0666250)	0.00528225	0.0126255	0.0134782	2539	-0.151319	(-0.2285694,-0.0740682)	0.000126146	0.000417203	0.000415847	1964	-0.138437	(-0.2113737,-0.0655003)	0.000202056	0.000397581	0.000426728	2537
NA	NA	QI270	mz584_5246_rt1_7	HILIC	FALSE	584.525	1.7	TRUE	1.31755	(1.1979318,1.4491230)	1.35641e-08	6.88095e-08	7.48112e-08	2749	0.0205384	(0.0152075,0.0258694)	5.69879e-14	5.49566e-13	6.09856e-13	2745	0.697203	(0.5377953,0.8566098)	1.67581e-17	2.49533e-16	2.89922e-16	2539	0.505273	(0.4309190,0.5796265)	7.48994e-39	3.94335e-37	5.11456e-37	1964	1.25282	(1.1956797,1.3099645)	1.0664e-303	2.07735e-301	2.5487e-301	2537
NA	NA	QI13954	mz357_2784_rt2_51	HILIC	FALSE	357.278	2.51	TRUE	1.30786	(1.1913533,1.4357686)	1.72145e-08	8.62053e-08	9.45808e-08	2749	0.0046584	(-0.0006994,0.0100163)	0.0883344	0.155023	0.151702	2745	0.471719	(0.3142381,0.6291997)	4.82005e-09	3.69664e-08	4.08991e-08	2539	0.227776	(0.1498746,0.3056769)	1.13162e-08	6.20277e-08	6.46511e-08	1964	0.256892	(0.1837115,0.3300732)	7.33615e-12	2.6662e-11	2.90609e-11	2537
NA	NA	QI13375	mz504_2076_rt3_26	HILIC	FALSE	504.208	3.26	TRUE	1.3097	(1.1921870,1.4387977)	1.85579e-08	9.26943e-08	1.01573e-07	2749	0.0274939	(0.0224238,0.0325640)	6.63674e-26	2.39414e-24	2.5045e-24	2745	0.161497	(0.0085414,0.3144530)	0.0385158	0.0729852	0.0764981	2539	0.340058	(0.2680399,0.4120762)	5.18096e-20	7.47593e-19	8.63895e-19	1964	0.433818	(0.3646465,0.5029886)	8.37895e-34	9.48965e-33	1.04482e-32	2537
NA	NA	QI6372	mz737_555_rt7_37	HILIC	FALSE	737.555	7.37	TRUE	0.770675	(0.7037974,0.8439077)	1.8632e-08	9.28264e-08	1.0159e-07	2749	0.0115138	(0.0064391,0.0165885)	8.97675e-06	3.4355e-05	3.46039e-05	2745	-0.36409	(-0.5148259,-0.2133538)	2.29566e-06	1.20214e-05	1.28092e-05	2539	-0.0161048	(-0.0901927,0.0579832)	0.669931	0.767662	0.76793	1964	-0.200681	(-0.2705000,-0.1308623)	1.93039e-08	5.28146e-08	5.87724e-08	2537
NA	NA	QI1070	mz536_5037_rt1_97	HILIC	FALSE	536.504	1.97	TRUE	0.777108	(0.7115178,0.8487448)	2.08092e-08	1.03409e-07	1.13032e-07	2749	-0.0007064	(-0.0059494,0.0045365)	0.79164	0.860122	0.857936	2745	-0.141751	(-0.2939230,0.0104205)	0.0678744	0.118264	0.123518	2539	-0.0650036	(-0.1369247,0.0069176)	0.0764597	0.144746	0.140568	1964	0.117013	(0.0464326,0.1875925)	0.00116539	0.00210787	0.00224318	2537
NA	NA	QI325	mz437_3985_rt1_73	HILIC	FALSE	437.399	1.73	TRUE	0.782688	(0.7183081,0.8528379)	2.20868e-08	1.09201e-07	1.19519e-07	2749	-0.0059878	(-0.0111883,-0.0007872)	0.0240465	0.0498856	0.0485672	2745	-0.299721	(-0.4494892,-0.1499533)	8.93238e-05	0.000330804	0.000343406	2539	-0.0499031	(-0.1210750,0.0212688)	0.169256	0.280128	0.274873	1964	-0.186588	(-0.2559788,-0.1171973)	1.45748e-07	3.69684e-07	4.05044e-07	2537
NA	NA	QI6902	mz191_0402_rt8_21	HILIC	FALSE	191.04	8.21	TRUE	0.780501	(0.7155185,0.8513839)	2.30226e-08	1.13539e-07	1.24114e-07	2749	-0.0109495	(-0.0163045,-0.0055945)	6.25154e-05	0.000214401	0.000210439	2745	-0.617607	(-0.7751924,-0.4600217)	2.16938e-14	2.65783e-13	2.96275e-13	2539	-0.099572	(-0.1763097,-0.0228342)	0.0110118	0.0261279	0.0253873	1964	-0.282751	(-0.3559040,-0.2095978)	4.84421e-14	2.05142e-13	2.23363e-13	2537
NA	NA	QI3176	mz462_197_rt3_86	HILIC	FALSE	462.197	3.86	TRUE	1.29731	(1.1840688,1.4213710)	2.32749e-08	1.14494e-07	1.25005e-07	2749	0.0186314	(0.0132961,0.0239668)	9.25099e-12	7.03943e-11	7.80348e-11	2745	0.418278	(0.2608634,0.5756934)	2.03559e-07	1.23917e-06	1.38343e-06	2539	0.396173	(0.3199755,0.4723712)	7.98029e-24	1.52408e-22	1.81647e-22	1964	0.266278	(0.1935685,0.3389865)	9.03829e-13	3.47956e-12	3.76771e-12	2537
Acisoga	HMDB0061384	QI11156	acisoga	HILIC	TRUE	185.129	5.86	TRUE	1.29431	(1.1820547,1.4172308)	2.501e-08	1.22719e-07	1.33822e-07	2749	0.0147425	(0.0095292,0.0199557)	3.22022e-08	1.67727e-07	1.76226e-07	2745	0.22228	(0.0684080,0.3761524)	0.00465256	0.0113276	0.0120783	2539	0.0489255	(-0.0238317,0.1216826)	0.187394	0.30144	0.296277	1964	0.167183	(0.0958128,0.2385526)	4.57484e-06	1.04845e-05	1.14093e-05	2537
NA	NA	QI9668	mz719_569_rt7_63	HILIC	FALSE	719.569	7.63	TRUE	0.780729	(0.7156069,0.8517768)	2.54468e-08	1.24549e-07	1.35653e-07	2749	-0.0114806	(-0.0167445,-0.0062167)	1.96282e-05	7.16025e-05	7.14387e-05	2745	-0.455061	(-0.6102014,-0.2999197)	9.89463e-09	7.11245e-08	7.97129e-08	2539	-0.296048	(-0.3707563,-0.2213394)	1.24187e-14	1.16306e-13	1.27203e-13	1964	-0.49263	(-0.5624735,-0.4227861)	5.37346e-42	7.7537e-41	8.56171e-41	2537
NA	NA	QI16030	mz581_4347_rt1_63	HILIC	FALSE	581.435	1.63	TRUE	0.792642	(0.7301679,0.8604612)	2.89164e-08	1.39429e-07	1.53578e-07	2749	-0.0182896	(-0.0236128,-0.0129665)	1.96079e-11	1.44137e-10	1.5976e-10	2745	-0.527315	(-0.6838752,-0.3707551)	4.84031e-11	4.44761e-10	4.88803e-10	2539	-0.322058	(-0.3953480,-0.2487688)	1.37861e-17	1.65774e-16	1.86503e-16	1964	-0.516071	(-0.5865881,-0.4455542)	5.83503e-45	9.39392e-44	1.00812e-43	2537
NA	NA	QI3810	mz287_0998_rt4_77	HILIC	FALSE	287.1	4.77	TRUE	1.30912	(1.1902239,1.4398859)	2.9439e-08	1.41598e-07	1.55777e-07	2749	-0.0020206	(-0.0070761,0.0030348)	0.433261	0.562287	0.557216	2745	0.0536424	(-0.0960982,0.2033830)	0.482454	0.582031	0.594874	2539	0.0677305	(-0.0042118,0.1396728)	0.0649908	0.126856	0.122627	1964	0.0291811	(-0.0403773,0.0987394)	0.410792	0.485572	0.496691	2537
N-Acetylaspartic acid	HMDB0000812	QI12630	n_acetylaspartic_acid	HILIC	TRUE	176.055	4.51	TRUE	0.755598	(0.6843272,0.8342917)	2.95504e-08	1.41784e-07	1.55791e-07	2749	-0.0177971	(-0.0229132,-0.0126810)	1.1084e-11	8.36885e-11	9.295e-11	2745	-0.871685	(-1.0186177,-0.7247522)	1.64328e-30	4.92478e-29	6.04221e-29	2539	-0.267223	(-0.3348822,-0.1995638)	1.51301e-14	1.4035e-13	1.53876e-13	1964	-0.0932736	(-0.1632562,-0.0232910)	0.00901477	0.0145491	0.0154262	2537
NA	NA	QI9632	mz592_47_rt7_7	HILIC	FALSE	592.47	7.7	TRUE	0.785666	(0.7212302,0.8558581)	3.29515e-08	1.57714e-07	1.73086e-07	2749	-0.013334	(-0.0186625,-0.0080055)	9.79958e-07	4.28979e-06	4.41906e-06	2745	-0.622856	(-0.7806867,-0.4650258)	1.4426e-14	1.7786e-13	1.98912e-13	2539	-0.318317	(-0.3949111,-0.2417226)	6.39539e-16	6.66215e-15	7.16484e-15	1964	-0.239776	(-0.3134956,-0.1660569)	2.12648e-10	6.97371e-10	7.68104e-10	2537
NA	NA	QI11756	mz271_0922_rt5_37	HILIC	FALSE	271.092	5.37	TRUE	1.27911	(1.1720822,1.3959075)	3.36242e-08	1.60539e-07	1.75975e-07	2749	0.002057	(-0.0030482,0.0071622)	0.429565	0.558234	0.553456	2745	0.356977	(0.2061016,0.5078531)	3.66912e-06	1.85167e-05	1.96325e-05	2539	-0.0698792	(-0.1426184,0.0028600)	0.0597041	0.117628	0.113729	1964	0.333913	(0.2647357,0.4030909)	6.47394e-21	4.20375e-20	4.64181e-20	2537
NA	NA	QI15761	mz423_3831_rt1_77	HILIC	FALSE	423.383	1.77	TRUE	0.779945	(0.7140330,0.8519408)	3.44912e-08	1.64276e-07	1.79856e-07	2749	-0.0048762	(-0.0099890,0.0002366)	0.0615762	0.113268	0.110652	2745	-0.218277	(-0.3653274,-0.0712270)	0.00363759	0.00913376	0.00975254	2539	-0.050485	(-0.1216972,0.0207271)	0.16458	0.274019	0.269108	1964	-0.222687	(-0.2905597,-0.1548148)	1.48454e-10	4.91817e-10	5.43069e-10	2537
NA	NA	QI4678	mz782_6027_rt5_6	HILIC	FALSE	782.603	5.6	TRUE	0.784987	(0.7202402,0.8555555)	3.54953e-08	1.68236e-07	1.83755e-07	2749	-0.01901	(-0.0243371,-0.0136829)	3.26707e-12	2.61903e-11	2.89196e-11	2745	-0.380256	(-0.5399548,-0.2205566)	3.18369e-06	1.62352e-05	1.7228e-05	2539	-0.328308	(-0.4033236,-0.2532932)	1.84714e-17	2.2075e-16	2.47551e-16	1964	-0.660184	(-0.7300474,-0.5903216)	5.51098e-72	1.49103e-70	1.64641e-70	2537
NA	NA	QI15804	mz199_1692_rt1_76	HILIC	FALSE	199.169	1.76	TRUE	0.777089	(0.7104347,0.8499961)	3.5471e-08	1.68236e-07	1.83755e-07	2749	-0.0024476	(-0.0076295,0.0027344)	0.354443	0.485211	0.478598	2745	-0.307069	(-0.4590901,-0.1550487)	7.67402e-05	0.000288035	0.000299037	2539	0.0097946	(-0.0626391,0.0822283)	0.790888	0.859829	0.860587	1964	-0.216445	(-0.2867991,-0.1460909)	1.84804e-09	5.57273e-09	6.09216e-09	2537
NA	NA	QI1478	mz326_305_rt2_09	HILIC	FALSE	326.305	2.09	TRUE	0.782561	(0.7169322,0.8541971)	4.10331e-08	1.93074e-07	2.1166e-07	2749	0.0030515	(-0.0022108,0.0083137)	0.255619	0.378091	0.373277	2745	-0.163943	(-0.3182914,-0.0095948)	0.0373699	0.0713692	0.0749251	2539	-0.0946779	(-0.1680300,-0.0213258)	0.0114401	0.0271111	0.0263324	1964	-0.0444936	(-0.1163900,0.0274028)	0.225045	0.286528	0.296597	2537
NA	NA	QI15766	mz586_5041_rt1_77	HILIC	FALSE	586.504	1.77	TRUE	0.777937	(0.7111704,0.8509730)	4.14179e-08	1.94329e-07	2.12536e-07	2749	-0.0051968	(-0.0102371,-0.0001565)	0.0433037	0.0836861	0.0814928	2745	-0.327663	(-0.4729865,-0.1823400)	1.02251e-05	4.60011e-05	4.87136e-05	2539	-0.0443808	(-0.1132045,0.0244428)	0.206143	0.326477	0.320965	1964	-0.269863	(-0.3367496,-0.2029774)	3.76344e-15	1.80127e-14	1.93433e-14	2537
Cortisol	HMDB0000063	QI1666	cortisol	HILIC	TRUE	363.216	2.11	TRUE	1.30348	(1.1856859,1.4329826)	4.14994e-08	1.94329e-07	2.12536e-07	2749	-0.0075488	(-0.0128660,-0.0022316)	0.00540974	0.0131034	0.0127504	2745	0.542809	(0.3854444,0.7001730)	1.66218e-11	1.57948e-10	1.75262e-10	2539	-0.0806098	(-0.1576993,-0.0035203)	0.0404257	0.0832181	0.0804623	1964	0.145935	(0.0723113,0.2195582)	0.000104159	0.000211576	0.000226997	2537
NA	NA	QI1027	mz547_219_rt1_95	HILIC	FALSE	547.219	1.95	TRUE	0.785478	(0.7205005,0.8563144)	4.22967e-08	1.97587e-07	2.15849e-07	2749	-0.0124348	(-0.0176232,-0.0072463)	2.73829e-06	1.11594e-05	1.13489e-05	2745	-0.290921	(-0.4430727,-0.1387698)	0.000181266	0.000623862	0.000648218	2539	-0.086815	(-0.1589770,-0.0146530)	0.0184018	0.0415855	0.0401647	1964	-0.126469	(-0.1971851,-0.0557527)	0.000461287	0.000874963	0.00093961	2537
NA	NA	QI1631	mz317_1493_rt2_1	HILIC	FALSE	317.149	2.1	TRUE	0.778352	(0.7113979,0.8516073)	4.75791e-08	2.20676e-07	2.41945e-07	2749	-0.0144716	(-0.0196155,-0.0093278)	3.77987e-08	1.93259e-07	2.02251e-07	2745	-0.27015	(-0.4216900,-0.1186100)	0.000480955	0.00150144	0.00157463	2539	-0.0989722	(-0.1721945,-0.0257499)	0.00809344	0.0198413	0.0193852	1964	-0.101723	(-0.1721590,-0.0312872)	0.00466346	0.00782465	0.00834882	2537
LPE(18:1)	HMDB0011506	QI10338	c18_1_lpe	HILIC	TRUE	480.308	6.41	TRUE	1.27626	(1.1690218,1.3933259)	5.10657e-08	2.36285e-07	2.58757e-07	2749	-0.0131128	(-0.0184501,-0.0077755)	1.53375e-06	6.45301e-06	6.62469e-06	2745	0.171246	(0.0150935,0.3273983)	0.0316149	0.0618332	0.0651376	2539	-0.132639	(-0.2088769,-0.0564008)	0.000657866	0.00197157	0.00196948	1964	0.442511	(0.3720125,0.5130097)	7.43499e-34	8.4698e-33	9.35243e-33	2537
NA	NA	QI2577	mz784_6646_rt2_86	HILIC	FALSE	784.665	2.86	TRUE	0.784891	(0.7192936,0.8564704)	5.34607e-08	2.46781e-07	2.69939e-07	2749	-0.0131991	(-0.0184926,-0.0079056)	1.07064e-06	4.65537e-06	4.78286e-06	2745	-0.393907	(-0.5516301,-0.2361831)	1.03302e-06	5.74949e-06	6.30362e-06	2539	-0.167729	(-0.2450971,-0.0903617)	2.22095e-05	8.06541e-05	8.15425e-05	1964	-0.311195	(-0.3836661,-0.2387241)	6.20087e-17	3.31849e-16	3.5711e-16	2537
NA	NA	QI15827	mz540_4636_rt1_75	HILIC	FALSE	540.464	1.75	TRUE	0.780625	(0.7139354,0.8535434)	5.46232e-08	2.51551e-07	2.74569e-07	2749	-0.0090552	(-0.0141431,-0.0039674)	0.000490905	0.00149653	0.00149144	2745	-0.358412	(-0.5054955,-0.2113287)	1.86868e-06	9.97312e-06	1.07187e-05	2539	-0.0503631	(-0.1202308,0.0195046)	0.157613	0.26491	0.259491	1964	-0.305379	(-0.3729598,-0.2377989)	1.4639e-18	8.58939e-18	9.37157e-18	2537
Oxoglutaric acid	NA	NA	a_ketoglutaric_acid	AMIDE	TRUE	NA	NA	TRUE	1.2718	(1.1661774,1.3869930)	5.47606e-08	2.51589e-07	2.74569e-07	2749	0.0168147	(0.0114909,0.0221385)	6.78448e-10	4.22242e-09	4.46282e-09	2745	0.327115	(0.1693673,0.4848621)	4.92341e-05	0.000188795	0.000196662	2539	0.147031	(0.0722131,0.2218481)	0.000119908	0.000397923	0.000396194	1964	0.163289	(0.0900227,0.2365553)	1.29095e-05	2.82558e-05	3.04477e-05	2537
NA	NA	QI15767	mz463_3771_rt1_77	HILIC	FALSE	463.377	1.77	TRUE	0.783092	(0.7167752,0.8555449)	6.10672e-08	2.79903e-07	3.05123e-07	2749	0.0023853	(-0.0028236,0.0075941)	0.369308	0.501346	0.494955	2745	-0.258367	(-0.4118188,-0.1049159)	0.000974749	0.00281364	0.00296771	2539	0.0135748	(-0.0578151,0.0849648)	0.709249	0.799547	0.800207	1964	-0.0834469	(-0.1547857,-0.0121081)	0.0218882	0.0332073	0.0351093	2537
NA	NA	QI557	mz521_4203_rt1_82	HILIC	FALSE	521.42	1.82	TRUE	0.785844	(0.7201305,0.8575545)	6.33877e-08	2.89179e-07	3.15618e-07	2749	-0.0048699	(-0.0099988,0.0002590)	0.0627362	0.114859	0.112035	2745	-0.219775	(-0.3678386,-0.0717118)	0.0036385	0.00913376	0.00975254	2539	0.0334502	(-0.0363325,0.1032330)	0.34729	0.478445	0.478859	1964	-0.213968	(-0.2823772,-0.1455583)	9.96262e-10	3.0854e-09	3.36943e-09	2537
NA	NA	QI15983	mz601_5186_rt1_67	HILIC	FALSE	601.519	1.67	TRUE	1.2911	(1.1766246,1.4167126)	6.90887e-08	3.12988e-07	3.42814e-07	2749	0.0095591	(0.0042472,0.0148709)	0.00042453	0.00130029	0.00129527	2745	0.499143	(0.3421807,0.6561057)	5.2529e-10	4.50777e-09	4.9557e-09	2539	0.199516	(0.1243176,0.2747137)	2.16144e-07	9.95387e-07	1.02974e-06	1964	1.093	(1.0331560,1.1528423)	1.2408e-227	1.51067e-225	1.61755e-225	2537
NA	NA	QI1581	mz288_1591_rt2_1	HILIC	FALSE	288.159	2.1	TRUE	1.29473	(1.1786218,1.4222871)	7.11912e-08	3.21764e-07	3.52028e-07	2749	0.0199859	(0.0146623,0.0253095)	2.39381e-13	2.1996e-12	2.41741e-12	2745	0.410012	(0.2520654,0.5679592)	3.83775e-07	2.2383e-06	2.47898e-06	2539	0.313701	(0.2352382,0.3921631)	7.28193e-15	7.05731e-14	7.67815e-14	1964	0.26979	(0.1968281,0.3427522)	5.47931e-13	2.1563e-12	2.34547e-12	2537
DG(36:3)	HMDB0007059	QI240	nh4_c36_3_dag_or_tag_fragment	HILIC	TRUE	636.555	1.69	TRUE	1.29552	(1.1788716,1.4237138)	7.52443e-08	3.39296e-07	3.70791e-07	2749	0.0088842	(0.0035664,0.0142021)	0.00106662	0.00304213	0.00301683	2745	0.636201	(0.4812637,0.7911387)	1.24195e-15	1.6685e-14	1.91501e-14	2539	0.322444	(0.2482286,0.3966588)	3.11219e-17	3.60866e-16	3.98471e-16	1964	1.38167	(1.3325337,1.4308061)	0	0	0	2537
Methionine sulfoxide	HMDB0002005	QI8958	methionine_sulfoxide	HILIC	TRUE	166.053	8.83	TRUE	1.267	(1.1620117,1.3814751)	8.2203e-08	3.68966e-07	4.03696e-07	2749	0.006275	(0.0009438,0.0116062)	0.0210762	0.0443374	0.0431145	2745	0.182354	(0.0266937,0.3380138)	0.0216902	0.0443829	0.0470556	2539	0.105018	(0.0282226,0.1818129)	0.00738162	0.0182712	0.0178805	1964	-0.0585546	(-0.1308477,0.0137384)	0.112353	0.150733	0.157338	2537
NA	NA	QI15582	mz221_1535_rt1_83	HILIC	FALSE	221.154	1.83	TRUE	0.788782	(0.7231012,0.8604282)	8.8512e-08	3.95462e-07	4.33195e-07	2749	-0.0018464	(-0.0070767,0.0033840)	0.488873	0.614403	0.610665	2745	-0.144684	(-0.2977700,0.0084019)	0.0639586	0.11265	0.117736	2539	0.0324222	(-0.0388947,0.1037391)	0.37272	0.502811	0.505658	1964	-0.148644	(-0.2195860,-0.0777012)	4.10671e-05	8.59277e-05	9.27405e-05	2537
NA	NA	QI11739	mz464_2178_rt5_39	HILIC	FALSE	464.218	5.39	TRUE	0.772539	(0.7027728,0.8492300)	9.08398e-08	4.03089e-07	4.43076e-07	2749	-0.0203157	(-0.0252428,-0.0153885)	9.23801e-16	1.06483e-14	1.1828e-14	2745	-0.250001	(-0.3976405,-0.1023611)	0.000911541	0.00266219	0.00281107	2539	-0.316366	(-0.3864757,-0.2462566)	1.91787e-18	2.52433e-17	2.86482e-17	1964	-0.299433	(-0.3670871,-0.2317785)	7.02928e-18	4.02491e-17	4.34482e-17	2537
NA	NA	QI694	mz397_3814_rt1_84	HILIC	FALSE	397.381	1.84	TRUE	0.791846	(0.7268723,0.8626283)	9.1524e-08	4.05202e-07	4.449e-07	2749	-0.0302736	(-0.0355028,-0.0250445)	3.22428e-29	1.36541e-27	1.35989e-27	2745	-0.470702	(-0.6295092,-0.3118946)	6.94409e-09	5.06632e-08	5.65786e-08	2539	-0.394873	(-0.4700107,-0.3197353)	2.71113e-24	5.28128e-23	6.37338e-23	1964	-0.226557	(-0.3000334,-0.1530806)	1.70169e-09	5.14735e-09	5.63562e-09	2537
NA	NA	QI2432	mz596_4158_rt2_67	HILIC	FALSE	596.416	2.67	TRUE	1.29136	(1.1753003,1.4188698)	1.02735e-07	4.51756e-07	4.97709e-07	2749	0.0099938	(0.0046632,0.0153243)	0.000241309	0.000770606	0.000767266	2745	0.332799	(0.1783711,0.4872273)	2.46486e-05	0.000101728	0.000106464	2539	0.091168	(0.0149315,0.1674045)	0.0191118	0.0429905	0.0415247	1964	0.156892	(0.0850959,0.2286876)	1.89516e-05	4.09742e-05	4.41178e-05	2537
NA	NA	QI6923	mz578_3218_rt8_24	HILIC	FALSE	578.322	8.24	TRUE	0.790632	(0.7249222,0.8622978)	1.11716e-07	4.8904e-07	5.39396e-07	2749	-0.0225421	(-0.0277366,-0.0173475)	2.84174e-17	3.87113e-16	4.0319e-16	2745	-0.574718	(-0.7297485,-0.4196874)	4.79023e-13	5.15545e-12	5.77243e-12	2539	-0.218358	(-0.2932063,-0.1435089)	1.21962e-08	6.63637e-08	6.91279e-08	1964	-0.0854427	(-0.1581289,-0.0127564)	0.0212449	0.0323827	0.0343076	2537
NA	NA	QI15843	mz542_4785_rt1_75	HILIC	FALSE	542.479	1.75	TRUE	0.785443	(0.7183687,0.8587793)	1.14076e-07	4.98251e-07	5.48943e-07	2749	-0.0083452	(-0.0134315,-0.0032589)	0.00130955	0.00365473	0.00361134	2745	-0.3823	(-0.5276325,-0.2369676)	2.68637e-07	1.60523e-06	1.77523e-06	2539	-0.0755003	(-0.1438313,-0.0071693)	0.0303595	0.0651445	0.0626526	1964	-0.314684	(-0.3814202,-0.2479472)	4.78721e-20	2.98894e-19	3.30041e-19	2537
NA	NA	QI1671	mz240_1956_rt2_11	HILIC	FALSE	240.196	2.11	TRUE	0.786402	(0.7194753,0.8595536)	1.19099e-07	5.19027e-07	5.71197e-07	2749	0.0011613	(-0.0040825,0.0064050)	0.664149	0.7563	0.754823	2745	-0.170986	(-0.3258292,-0.0161429)	0.0304554	0.0597453	0.0630203	2539	0.0374903	(-0.0348032,0.1097838)	0.309262	0.44006	0.439526	1964	-0.141704	(-0.2134306,-0.0699768)	0.000109798	0.000222104	0.0002382	2537
NA	NA	QI6505	mz513_3341_rt7_62	HILIC	FALSE	513.334	7.62	TRUE	1.29565	(1.1765254,1.4268338)	1.41264e-07	6.11516e-07	6.75242e-07	2749	0.0121918	(0.0070448,0.0173388)	3.56768e-06	1.43296e-05	1.46173e-05	2745	0.68181	(0.5300452,0.8335754)	2.28604e-18	3.74219e-17	4.3134e-17	2539	0.29773	(0.2236535,0.3718066)	5.28439e-15	5.19899e-14	5.69761e-14	1964	0.0892463	(0.0178982,0.1605945)	0.0142416	0.0223191	0.0236645	2537
NA	NA	QI15014	mz163_148_rt2	HILIC	FALSE	163.148	2	TRUE	0.787942	(0.7209485,0.8611600)	1.46399e-07	6.3234e-07	6.97462e-07	2749	-0.0005898	(-0.0057781,0.0045985)	0.823632	0.8835	0.880096	2745	-0.218802	(-0.3698335,-0.0677700)	0.00453624	0.0110734	0.0118272	2539	0.0004506	(-0.0712084,0.0721096)	0.990161	0.99322	0.993626	1964	-0.151551	(-0.2216115,-0.0814895)	2.29833e-05	4.95738e-05	5.34166e-05	2537
NA	NA	QI15737	mz584_4883_rt1_78	HILIC	FALSE	584.488	1.78	TRUE	0.791085	(0.7248757,0.8633429)	1.48042e-07	6.38022e-07	7.02954e-07	2749	-0.007692	(-0.0128091,-0.0025749)	0.00323059	0.00841335	0.00822854	2745	-0.25767	(-0.4044788,-0.1108618)	0.000587512	0.00180801	0.0018975	2539	-0.0121834	(-0.0811875,0.0568206)	0.729179	0.813074	0.815634	1964	-0.257523	(-0.3251156,-0.1899300)	1.09053e-13	4.48176e-13	4.85658e-13	2537
NA	NA	QI9888	mz771_636_rt7_22	HILIC	FALSE	771.636	7.22	TRUE	0.766209	(0.6934137,0.8466466)	1.71016e-07	7.33787e-07	8.09363e-07	2749	0.0139368	(0.0092928,0.0185808)	4.47697e-09	2.55004e-08	2.68374e-08	2745	-0.305342	(-0.4443308,-0.1663531)	1.71118e-05	7.27812e-05	7.64434e-05	2539	-0.0478907	(-0.1162705,0.0204891)	0.169743	0.280666	0.275245	1964	-0.195481	(-0.2598118,-0.1311496)	2.89913e-09	8.609e-09	9.44853e-09	2537
NA	NA	QI6252	mz356_279_rt7_08	HILIC	FALSE	356.279	7.08	TRUE	0.785505	(0.7173283,0.8601612)	1.87063e-07	7.9912e-07	8.82396e-07	2749	-0.0018576	(-0.0071277,0.0034125)	0.489525	0.614826	0.610948	2745	-0.307637	(-0.4616075,-0.1536657)	9.16813e-05	0.000338248	0.000351527	2539	0.0262657	(-0.0487482,0.1012797)	0.492356	0.616394	0.619332	1964	-0.0637917	(-0.1355469,0.0079635)	0.0814066	0.112868	0.118635	2537
NA	NA	QI9706	mz501_9872_rt7_6	HILIC	FALSE	501.987	7.6	TRUE	1.2756	(1.1639836,1.3979109)	1.88545e-07	8.03689e-07	8.86471e-07	2749	0.0151389	(0.0098530,0.0204247)	2.15236e-08	1.14245e-07	1.20097e-07	2745	0.558436	(0.4013244,0.7155485)	4.0322e-12	4.04883e-11	4.51732e-11	2539	0.321382	(0.2447337,0.3980294)	3.56664e-16	3.75558e-15	4.05918e-15	1964	0.292189	(0.2194730,0.3649052)	4.84444e-15	2.3017e-14	2.47222e-14	2537
Leucine	HMDB0000687	TF24	leucine	HILIC	TRUE	132.102	7.16	TRUE	1.29854	(1.1769350,1.4327052)	1.91511e-07	8.14549e-07	8.97473e-07	2749	0.0160854	(0.0112211,0.0209497)	1.05521e-10	6.96796e-10	7.49095e-10	2745	0.830852	(0.6925234,0.9691798)	3.25422e-31	1.00623e-29	1.22804e-29	2539	0.370719	(0.3040481,0.4373909)	6.37317e-27	1.49578e-25	1.82783e-25	1964	0.41435	(0.3504018,0.4782981)	6.70257e-36	8.05963e-35	8.9827e-35	2537
NA	NA	QI12089	mz601_5189_rt5_03	HILIC	FALSE	601.519	5.03	TRUE	0.785916	(0.7177188,0.8605940)	1.97548e-07	8.38395e-07	9.22749e-07	2749	-0.0153128	(-0.0205172,-0.0101084)	8.84981e-09	4.92555e-08	5.13791e-08	2745	-0.496611	(-0.6511864,-0.3420364)	3.50059e-10	3.07169e-09	3.39179e-09	2539	-0.18018	(-0.2556819,-0.1046789)	3.06158e-06	1.22463e-05	1.24371e-05	1964	0.17069	(0.0986233,0.2427575)	3.58534e-06	8.27517e-06	9.00416e-06	2537
N4-Acetylcytidine	HMDB0005923	QI3489	n4_acetylcytidine	HILIC	TRUE	286.103	4.39	TRUE	1.26148	(1.1555624,1.3771089)	2.08848e-07	8.84426e-07	9.72364e-07	2749	0.0267263	(0.0215947,0.0318580)	4.684e-24	1.36186e-22	1.42912e-22	2745	0.292629	(0.1390836,0.4461752)	0.000190263	0.000651375	0.000677015	2539	0.337471	(0.2651739,0.4097681)	1.33359e-19	1.91017e-18	2.19812e-18	1964	0.375299	(0.3052762,0.4453220)	2.56503e-25	2.03117e-24	2.27053e-24	2537
NA	NA	QI9778	mz711_5397_rt7_45	HILIC	FALSE	711.54	7.45	TRUE	0.790125	(0.7226717,0.8638742)	2.29272e-07	9.68811e-07	1.064e-06	2749	0.0018854	(-0.0033819,0.0071526)	0.482828	0.608376	0.604695	2745	-0.224691	(-0.3802514,-0.0691300)	0.0046578	0.0113276	0.0120783	2539	-0.0326753	(-0.1084842,0.0431335)	0.39804	0.530357	0.531461	1964	-0.198757	(-0.2706799,-0.1268344)	6.56206e-08	1.71123e-07	1.89336e-07	2537
NA	NA	QI228	mz682_539_rt1_68	HILIC	FALSE	682.539	1.68	TRUE	1.29394	(1.1735496,1.4266838)	2.31958e-07	9.78039e-07	1.07299e-06	2749	0.0131403	(0.0078324,0.0184481)	1.27588e-06	5.48657e-06	5.62958e-06	2745	0.578967	(0.4217455,0.7361895)	6.79293e-13	7.23094e-12	8.05046e-12	2539	0.383976	(0.3058843,0.4620668)	1.56781e-21	2.483e-20	2.91979e-20	1964	0.9792	(0.9159460,1.0424534)	6.911e-173	4.80808e-171	5.50576e-171	2537
NA	NA	QI2482	mz204_1231_rt2_74	HILIC	FALSE	204.123	2.74	TRUE	1.26233	(1.1556035,1.3789038)	2.35474e-07	9.9072e-07	1.08575e-06	2749	0.0052472	(-0.0001318,0.0106262)	0.0558778	0.104063	0.101945	2745	0.30694	(0.1492699,0.4646103)	0.000138136	0.00048572	0.000506616	2539	0.0702011	(-0.0052418,0.1456439)	0.0681664	0.131676	0.127642	1964	0.0974537	(0.0238256,0.1710819)	0.00950164	0.0152716	0.0162014	2537
NA	NA	QI757	mz249_1847_rt1_86	HILIC	FALSE	249.185	1.86	TRUE	0.792946	(0.7261247,0.8659165)	2.40152e-07	1.00822e-06	1.10378e-06	2749	0.0069596	(0.0017766,0.0121426)	0.0085119	0.019716	0.0192221	2745	-0.149024	(-0.3003259,0.0022774)	0.0535468	0.0964932	0.100769	2539	0.16073	(0.0909709,0.2304890)	6.59345e-06	2.54337e-05	2.5763e-05	1964	-0.157164	(-0.2272351,-0.0870935)	1.13676e-05	2.51067e-05	2.71234e-05	2537
NA	NA	QI4175	mz220_0602_rt5_12	HILIC	FALSE	220.06	5.12	TRUE	1.2612	(1.1544828,1.3777789)	2.681e-07	1.11833e-06	1.22829e-06	2749	0.018542	(0.0132080,0.0238760)	1.14512e-11	8.61272e-11	9.54711e-11	2745	0.600848	(0.4460809,0.7556160)	3.76125e-14	4.57932e-13	5.08833e-13	2539	0.244951	(0.1722185,0.3176839)	5.10881e-11	3.57984e-10	3.81564e-10	1964	0.256713	(0.1846728,0.3287531)	3.56104e-12	1.32891e-11	1.44661e-11	2537
NA	HMDB0006344	QI12402	phenylacetylglutamine	HILIC	TRUE	265.118	4.75	TRUE	1.28867	(1.1698213,1.4195877)	2.78859e-07	1.15825e-06	1.27352e-06	2749	-0.0020872	(-0.0071163,0.0029419)	0.415835	0.547329	0.541605	2745	0.0207145	(-0.1280633,0.1694923)	0.784862	0.839139	0.847509	2539	0.055317	(-0.0161282,0.1267621)	0.129061	0.224643	0.220229	1964	-0.04043	(-0.1095391,0.0286791)	0.251423	0.317005	0.328062	2537
NA	NA	QI6750	mz661_2991_rt7_99	HILIC	FALSE	661.299	7.99	TRUE	1.29261	(1.1719033,1.4257432)	2.87515e-07	1.19166e-06	1.30888e-06	2749	0.0240865	(0.0187730,0.0294000)	1.09739e-18	1.7964e-17	1.85136e-17	2745	0.64456	(0.4852734,0.8038474)	3.13427e-15	3.99056e-14	4.49454e-14	2539	0.422129	(0.3445755,0.4996821)	6.77001e-26	1.49863e-24	1.79781e-24	1964	0.17255	(0.0979546,0.2471462)	6.00489e-06	1.36876e-05	1.48791e-05	2537
NA	HMDB0003681	QI2968	_4_acetamidobutanoate	HILIC	TRUE	146.081	3.57	TRUE	1.26214	(1.1544907,1.3798324)	3.08356e-07	1.26458e-06	1.39931e-06	2749	0.0042363	(-0.0006865,0.0091592)	0.0916436	0.159823	0.156232	2745	-0.0396614	(-0.1793161,0.0999934)	0.577654	0.670245	0.68238	2539	-0.0081259	(-0.0684416,0.0521897)	0.791641	0.860076	0.860662	1964	0.253925	(0.1897264,0.3181244)	1.26132e-14	5.71407e-14	6.09001e-14	2537
NA	NA	QI6523	mz782_5668_rt7_63	HILIC	FALSE	782.567	7.63	TRUE	1.26731	(1.1571348,1.3879701)	3.30468e-07	1.34395e-06	1.49022e-06	2749	8.05e-05	(-0.0052257,0.0053867)	0.976278	0.985383	0.986487	2745	0.736583	(0.5800574,0.8931082)	5.65989e-20	1.04014e-18	1.19357e-18	2539	0.0087794	(-0.0685881,0.0861470)	0.82391	0.880887	0.880393	1964	0.757337	(0.6895599,0.8251147)	1.36999e-97	5.03536e-96	5.77813e-96	2537
NA	NA	QI9892	mz384_3249_rt7_21	HILIC	FALSE	384.325	7.21	TRUE	0.79386	(0.7265310,0.8674282)	3.30408e-07	1.34395e-06	1.49022e-06	2749	-0.00549	(-0.0107280,-0.0002520)	0.0399579	0.0776826	0.0756566	2745	-0.330576	(-0.4875459,-0.1736071)	3.75085e-05	0.000148812	0.000155454	2539	-0.121547	(-0.1966498,-0.0464445)	0.0015269	0.00431698	0.00428488	1964	-0.184021	(-0.2567584,-0.1112836)	7.47964e-07	1.78997e-06	1.95015e-06	2537
NA	NA	QI8768	mz200_0406_rt9_57	HILIC	FALSE	200.041	9.57	TRUE	0.793463	(0.7259366,0.8672704)	3.43298e-07	1.39322e-06	1.54323e-06	2749	-0.0187805	(-0.0241056,-0.0134554)	5.78035e-12	4.45064e-11	4.93394e-11	2745	-0.270376	(-0.4282250,-0.1125262)	0.000794483	0.00234493	0.00248211	2539	-0.112578	(-0.1878141,-0.0373429)	0.00337867	0.00895462	0.00882516	1964	-0.0859307	(-0.1593479,-0.0125135)	0.0218074	0.0331364	0.0350581	2537
NA	NA	QI3139	mz385_3058_rt3_81	HILIC	FALSE	385.306	3.81	TRUE	0.786587	(0.7172331,0.8626463)	3.44464e-07	1.39504e-06	1.54363e-06	2749	-0.0248092	(-0.0298318,-0.0197867)	7.73397e-22	1.7317e-20	1.81812e-20	2745	-0.435672	(-0.5853703,-0.2859740)	1.28452e-08	9.0661e-08	1.00656e-07	2539	-0.239368	(-0.3109743,-0.1677621)	7.05221e-11	4.82025e-10	5.08184e-10	1964	-0.0954356	(-0.1653225,-0.0255487)	0.0074597	0.0121399	0.0129038	2537
NA	NA	QI425	mz283_2623_rt1_77	HILIC	FALSE	283.262	1.77	TRUE	0.795148	(0.7279527,0.8685448)	3.60765e-07	1.45803e-06	1.61164e-06	2749	-6.44e-05	(-0.0052802,0.0051513)	0.980672	0.988282	0.988948	2745	-0.195497	(-0.3454677,-0.0455255)	0.0106414	0.0236908	0.025016	2539	-0.0446845	(-0.1160899,0.0267208)	0.219866	0.342092	0.33577	1964	-0.176954	(-0.2462716,-0.1076356)	5.94673e-07	1.43725e-06	1.5647e-06	2537
Uridine	NA	NA	uridine	AMIDE	TRUE	NA	NA	TRUE	0.805247	(0.7406271,0.8755056)	3.87375e-07	1.56233e-06	1.72514e-06	2749	0.0036905	(-0.0015692,0.0089503)	0.168986	0.266115	0.261409	2745	-0.0738296	(-0.2189930,0.0713338)	0.318711	0.418644	0.427132	2539	0.0295306	(-0.0386599,0.0977210)	0.395815	0.528839	0.530466	1964	-0.0801945	(-0.1475175,-0.0128715)	0.019579	0.0300078	0.0318325	2537
NA	NA	QI15683	mz626_4981_rt1_8	HILIC	FALSE	626.498	1.8	TRUE	0.800753	(0.7346148,0.8728449)	4.37246e-07	1.7562e-06	1.94121e-06	2749	-0.007712	(-0.0128441,-0.0025799)	0.00324062	0.00842821	0.00823945	2745	-0.275347	(-0.4244945,-0.1261994)	0.000300267	0.000967422	0.00101617	2539	-0.0528807	(-0.1235885,0.0178270)	0.142613	0.244121	0.23947	1964	-0.272252	(-0.3408879,-0.2036157)	1.06305e-14	4.86108e-14	5.20278e-14	2537
NA	NA	QI15783	mz547_4361_rt1_77	HILIC	FALSE	547.436	1.77	TRUE	0.796694	(0.7293703,0.8702312)	4.52068e-07	1.81199e-06	2.00051e-06	2749	-0.0100823	(-0.0151323,-0.0050323)	9.26891e-05	0.00031302	0.000307768	2745	-0.302853	(-0.4481170,-0.1575890)	4.48315e-05	0.000172934	0.000180585	2539	-0.0677464	(-0.1350733,-0.0004195)	0.0485908	0.0974819	0.0945444	1964	-0.309181	(-0.3758494,-0.2425130)	1.88026e-19	1.1375e-18	1.25409e-18	2537
alpha-Tocopherol	NA	QI15768	mz431_3517_rt1_77	HILIC	FALSE	431.352	1.77	TRUE	0.788773	(0.7193146,0.8649389)	4.53393e-07	1.81357e-06	2.00051e-06	2749	0.0077704	(0.0024883,0.0130524)	0.00395045	0.00998116	0.00976715	2745	-0.07986	(-0.2350196,0.0752995)	0.312942	0.413016	0.421766	2539	0.0975538	(0.0246902,0.1704174)	0.00871366	0.0210598	0.0204842	1964	-0.130938	(-0.2028400,-0.0590353)	0.000362389	0.000697563	0.000748798	2537
NA	NA	QI15536	mz690_6167_rt1_83	HILIC	FALSE	690.617	1.83	TRUE	0.797976	(0.7308761,0.8712367)	4.75884e-07	1.89964e-06	2.09331e-06	2749	-0.0016623	(-0.0070111,0.0036866)	0.542328	0.656698	0.653085	2745	-0.393284	(-0.5499405,-0.2366283)	9.07801e-07	5.11097e-06	5.61115e-06	2539	-0.262063	(-0.3367487,-0.1873769)	7.94254e-12	6.02026e-11	6.39865e-11	1964	-1.06358	(-1.1238880,-1.0032749)	5.5731e-215	6.38612e-213	6.65985e-213	2537
NA	NA	QI9500	mz280_1538_rt7_83	HILIC	FALSE	280.154	7.83	TRUE	1.28276	(1.1642157,1.4133638)	4.81856e-07	1.91954e-06	2.11309e-06	2749	-0.0021309	(-0.0073430,0.0030813)	0.422835	0.551696	0.54675	2745	0.265815	(0.1110539,0.4205763)	0.000768448	0.00228192	0.00241545	2539	0.15958	(0.0841971,0.2349632)	3.44229e-05	0.000122813	0.000123715	1964	-0.0192011	(-0.0912257,0.0528236)	0.60119	0.664528	0.67325	2537
NA	NA	QI15786	mz251_2003_rt1_77	HILIC	FALSE	251.2	1.77	TRUE	0.799619	(0.7329001,0.8724117)	4.8922e-07	1.9449e-06	2.13885e-06	2749	-0.0021062	(-0.0073056,0.0030931)	0.427078	0.555487	0.550746	2745	-0.203354	(-0.3543597,-0.0523478)	0.00832507	0.0189897	0.0201658	2539	-0.0155935	(-0.0864239,0.0552369)	0.665965	0.764917	0.764607	1964	-0.225994	(-0.2957056,-0.1562819)	2.43368e-10	7.94105e-10	8.74661e-10	2537
Retinol	NA	QI176	vitamin_a	HILIC	TRUE	269.226	1.65	TRUE	1.27717	(1.1609709,1.4049902)	4.98679e-07	1.97444e-06	2.16699e-06	2749	0.0002994	(-0.0048942,0.0054930)	0.910017	0.945447	0.943575	2745	0.329577	(0.1758441,0.4833103)	2.7153e-05	0.000111591	0.000116579	2539	0.0621482	(-0.0142805,0.1385770)	0.110933	0.19753	0.193056	1964	0.391658	(0.3217028,0.4616140)	1.99439e-27	1.73441e-26	1.91943e-26	2537
NA	NA	QI628	mz367_2841_rt1_83	HILIC	FALSE	367.284	1.83	TRUE	0.807641	(0.7430981,0.8777890)	4.97309e-07	1.97303e-06	2.16699e-06	2749	-0.0096912	(-0.0150364,-0.0043460)	0.000384197	0.00118608	0.00117974	2745	-0.225712	(-0.3814104,-0.0700139)	0.00450952	0.0110315	0.0117891	2539	-0.019518	(-0.0913913,0.0523553)	0.594386	0.703441	0.704421	1964	-0.304513	(-0.3759876,-0.2330384)	1.06997e-16	5.6793e-16	6.08864e-16	2537
NA	NA	QI4974	mz742_5371_rt5_81	HILIC	FALSE	742.537	5.81	TRUE	1.26732	(1.1553764,1.3901127)	5.1439e-07	2.03252e-06	2.22851e-06	2749	-0.0155463	(-0.0208125,-0.0102801)	7.90787e-09	4.42659e-08	4.62852e-08	2745	0.220925	(0.0669246,0.3749258)	0.00494512	0.011878	0.0126857	2539	-0.0749281	(-0.1504838,0.0006277)	0.0519319	0.103545	0.100229	1964	0.683195	(0.6166232,0.7497669)	1.13282e-83	3.74023e-82	4.16529e-82	2537
NA	NA	QI7703	mz205_1547_rt11_07	HILIC	FALSE	205.155	11.07	TRUE	1.28021	(1.1623155,1.4100531)	5.39849e-07	2.1288e-06	2.33123e-06	2749	0.0124509	(0.0073388,0.0175630)	1.88478e-06	7.82847e-06	7.99637e-06	2745	0.112456	(-0.0372816,0.2621932)	0.140963	0.219677	0.225604	2539	0.202141	(0.1307737,0.2735074)	3.15754e-08	1.66691e-07	1.73483e-07	1964	0.14739	(0.0780451,0.2167340)	3.1782e-05	6.72949e-05	7.25723e-05	2537
NA	NA	QI15891	mz219_2107_rt1_72	HILIC	FALSE	219.211	1.72	TRUE	0.80019	(0.7333798,0.8730859)	5.41352e-07	2.13041e-06	2.33123e-06	2749	-0.0049629	(-0.0102853,0.0003595)	0.0676021	0.122274	0.119533	2745	-0.0687726	(-0.2263521,0.0888070)	0.392191	0.492578	0.503493	2539	-0.0807762	(-0.1564761,-0.0050763)	0.0365054	0.076301	0.0735235	1964	-0.0397777	(-0.1129094,0.0333539)	0.286267	0.356501	0.36835	2537
NA	NA	QI584	mz519_4046_rt1_82	HILIC	FALSE	519.405	1.82	TRUE	0.799355	(0.7322869,0.8725660)	5.47773e-07	2.15133e-06	2.35182e-06	2749	-0.006761	(-0.0118872,-0.0016348)	0.00975605	0.0223323	0.0217916	2745	-0.202674	(-0.3514053,-0.0539426)	0.00758632	0.0175304	0.0185645	2539	0.00477	(-0.0648469,0.0743868)	0.89312	0.928883	0.929415	1964	-0.275504	(-0.3438848,-0.2071243)	4.10545e-15	1.95536e-14	2.10258e-14	2537
NA	NA	QI4952	mz583_2547_rt5_79	HILIC	FALSE	583.255	5.79	TRUE	0.803808	(0.7378937,0.8756096)	5.64836e-07	2.21388e-06	2.41784e-06	2749	-0.0080212	(-0.0133886,-0.0026539)	0.00341378	0.00881969	0.00863379	2745	0.0494755	(-0.1090541,0.2080052)	0.540608	0.634783	0.647105	2539	-0.188207	(-0.2642647,-0.1121491)	1.31238e-06	5.53358e-06	5.66853e-06	1964	-0.103585	(-0.1770821,-0.0300877)	0.00575742	0.00955944	0.0101994	2537
N1-Methyl-2-pyridone-5-carboxamide	HMDB0004193	QI3546	n1_methyl_2_pyridone_5_carbo	HILIC	TRUE	153.066	4.47	TRUE	1.24989	(1.1452734,1.3640629)	5.69233e-07	2.22664e-06	2.42941e-06	2749	0.0248595	(0.0196576,0.0300615)	1.45854e-20	2.8131e-19	2.94584e-19	2745	0.0833599	(-0.0703309,0.2370507)	0.287626	0.385613	0.395072	2539	0.196497	(0.1230667,0.2699270)	1.70361e-07	7.97748e-07	8.28128e-07	1964	0.226086	(0.1552002,0.2969726)	4.67673e-10	1.48861e-09	1.62777e-09	2537
NA	NA	QI5953	mz122_0329_rt6_54	HILIC	FALSE	122.033	6.54	TRUE	1.25263	(1.1467207,1.3683272)	5.8108e-07	2.26842e-06	2.47261e-06	2749	0.0135392	(0.0085174,0.0185610)	1.34477e-07	6.45225e-07	6.76632e-07	2745	0.169798	(0.0268464,0.3127488)	0.0199288	0.0414315	0.0441017	2539	0.197063	(0.1331003,0.2610265)	1.81518e-09	1.09473e-08	1.14668e-08	1964	0.263392	(0.1976841,0.3291005)	5.61962e-15	2.65704e-14	2.84754e-14	2537
Pantothenic acid	HMDB0000210	QI13424	pantothenate	HILIC	TRUE	220.118	3.16	TRUE	1.25198	(1.1460423,1.3677020)	6.29411e-07	2.44729e-06	2.67034e-06	2749	0.010705	(0.0055648,0.0158453)	4.56071e-05	0.000158365	0.000155716	2745	0.305038	(0.1548898,0.4551869)	6.97575e-05	0.000264888	0.000275571	2539	0.116929	(0.0437044,0.1901541)	0.0017636	0.00490085	0.00484483	1964	0.266831	(0.1976758,0.3359861)	5.35213e-14	2.2567e-13	2.45206e-13	2537
NA	NA	QI4123	mz464_1913_rt5_06	HILIC	FALSE	464.191	5.06	TRUE	1.26967	(1.1555771,1.3950193)	6.69423e-07	2.59768e-06	2.83172e-06	2749	0.0234101	(0.0181067,0.0287134)	8.22325e-18	1.18658e-16	1.24128e-16	2745	0.579562	(0.4260750,0.7330482)	1.78478e-13	2.03319e-12	2.30574e-12	2539	0.408807	(0.3355540,0.4820610)	4.21351e-27	1.03898e-25	1.28557e-25	1964	0.482386	(0.4127683,0.5520038)	1.22385e-40	1.6556e-39	1.82813e-39	2537
NA	NA	QI12329	mz182_0673_rt4_81	HILIC	FALSE	182.067	4.81	TRUE	1.26579	(1.1531905,1.3893805)	7.10142e-07	2.74476e-06	2.99513e-06	2749	0.0321486	(0.0272631,0.0370341)	5.06405e-37	4.69751e-35	4.53865e-35	2745	0.211568	(0.0647514,0.3583851)	0.00475431	0.0114946	0.0122663	2539	0.237481	(0.1683337,0.3066273)	2.13947e-11	1.53224e-10	1.64064e-10	1964	0.277118	(0.2094748,0.3447606)	1.43873e-15	7.05956e-15	7.61306e-15	2537
NA	NA	QI6509	mz203_0765_rt7_62	HILIC	FALSE	203.077	7.62	TRUE	1.26575	(1.1530413,1.3894734)	7.31916e-07	2.82331e-06	3.07791e-06	2749	0.0189124	(0.0136525,0.0241723)	2.24962e-12	1.82594e-11	2.02788e-11	2745	0.72962	(0.5727706,0.8864696)	1.46817e-19	2.62385e-18	3.00765e-18	2539	0.355259	(0.2812725,0.4292451)	1.25772e-20	1.88465e-19	2.19948e-19	1964	0.345808	(0.2730257,0.4185909)	2.52499e-20	1.59181e-19	1.75769e-19	2537
NA	NA	QI4070	mz625_5184_rt4_98	HILIC	FALSE	625.518	4.98	TRUE	0.796557	(0.7276210,0.8720243)	8.4347e-07	3.23441e-06	3.53665e-06	2749	-0.0070439	(-0.0122864,-0.0018014)	0.00847127	0.0196453	0.0191606	2745	-0.348292	(-0.5030885,-0.1934949)	1.06695e-05	4.76702e-05	5.03292e-05	2539	-0.142509	(-0.2180475,-0.0669695)	0.000221662	0.00070097	0.000698601	1964	0.337127	(0.2661975,0.4080557)	2.44693e-20	1.5476e-19	1.71166e-19	2537
NA	NA	QI411	mz405_3726_rt1_77	HILIC	FALSE	405.373	1.77	TRUE	0.799748	(0.7316234,0.8742161)	8.68486e-07	3.30505e-06	3.62037e-06	2749	-0.0005424	(-0.0056772,0.0045923)	0.835913	0.894145	0.890326	2745	-0.272861	(-0.4227799,-0.1229430)	0.000365047	0.00115253	0.00120617	2539	-0.02676	(-0.0988961,0.0453761)	0.466989	0.594572	0.597913	1964	-0.23115	(-0.3005266,-0.1617725)	7.74992e-11	2.6347e-10	2.90926e-10	2537
NA	NA	QI9833	mz738_5622_rt7_35	HILIC	FALSE	738.562	7.35	TRUE	0.794985	(0.7255400,0.8710776)	8.67705e-07	3.30505e-06	3.62037e-06	2749	0.0163576	(0.0113119,0.0214034)	2.40526e-10	1.56704e-09	1.67434e-09	2745	-0.114102	(-0.2631707,0.0349673)	0.133498	0.209387	0.214963	2539	0.0234574	(-0.0483535,0.0952683)	0.521839	0.643789	0.647333	1964	-0.0544113	(-0.1236342,0.0148115)	0.123361	0.164369	0.171414	2537
NA	NA	QI2877	mz156_0653_rt3_38	HILIC	FALSE	156.065	3.38	TRUE	1.25373	(1.1455637,1.3721127)	9.01601e-07	3.41485e-06	3.74165e-06	2749	0.0166589	(0.0116698,0.0216480)	6.96791e-11	4.74598e-10	5.15051e-10	2745	0.100697	(-0.0438631,0.2452563)	0.172087	0.256878	0.261412	2539	0.169527	(0.1027467,0.2363075)	6.96569e-07	3.06302e-06	3.16101e-06	1964	0.264943	(0.1984834,0.3314016)	7.85453e-15	3.64301e-14	3.92453e-14	2537
Allantoin	HMDB0000462	QI3026	allantoin	HILIC	TRUE	159.051	3.68	TRUE	1.265	(1.1517357,1.3894061)	9.02796e-07	3.41485e-06	3.74165e-06	2749	0.0130401	(0.0079311,0.0181490)	5.94496e-07	2.64652e-06	2.74378e-06	2745	0.151042	(0.0010275,0.3010563)	0.0484524	0.0887914	0.0927647	2539	0.0809237	(0.0103744,0.1514730)	0.0245869	0.0536943	0.0517733	1964	0.132312	(0.0627275,0.2018972)	0.000196798	0.000387626	0.000416236	2537
NA	NA	QI3451	mz158_0811_rt4_33	HILIC	FALSE	158.081	4.33	TRUE	1.23945	(1.1375381,1.3504823)	9.40054e-07	3.54889e-06	3.88483e-06	2749	0.0095879	(0.0044573,0.0147185)	0.000252706	0.000803053	0.000799957	2745	0.0591044	(-0.0897581,0.2079669)	0.436314	0.536745	0.548527	2539	0.046109	(-0.0222806,0.1144987)	0.186241	0.300081	0.295105	1964	0.199661	(0.1309158,0.2684061)	1.3748e-08	3.83683e-08	4.24884e-08	2537
LPC(O-18:0)	NA	QI9457	mz510_3915_rt7_95	HILIC	FALSE	510.392	7.95	TRUE	0.803728	(0.7364322,0.8771724)	9.7125e-07	3.65956e-06	4.00222e-06	2749	-0.0073865	(-0.0127456,-0.0020275)	0.00692097	0.0164616	0.0160075	2745	-0.495343	(-0.6549312,-0.3357547)	1.32997e-09	1.09316e-08	1.19948e-08	2539	-0.262517	(-0.3404975,-0.1845361)	5.20191e-11	3.63201e-10	3.86505e-10	1964	-0.362231	(-0.4354916,-0.2889695)	7.52198e-22	5.08778e-21	5.58887e-21	2537
NA	NA	QI10337	mz313_1543_rt6_41	HILIC	FALSE	313.154	6.41	TRUE	0.807431	(0.7410371,0.8797735)	1.03031e-06	3.86714e-06	4.23342e-06	2749	0.0003782	(-0.0049534,0.0057099)	0.889381	0.931459	0.93229	2745	-0.106366	(-0.2618662,0.0491349)	0.179944	0.265755	0.270688	2539	0.147521	(0.0762142,0.2188279)	5.15871e-05	0.000180416	0.00018087	1964	0.107295	(0.0351575,0.1794332)	0.00357006	0.00607909	0.00648855	2537
NA	NA	QI9912	mz330_2634_rt7_12	HILIC	FALSE	330.263	7.12	TRUE	0.794541	(0.7244231,0.8714459)	1.06584e-06	3.9928e-06	4.3669e-06	2749	-0.000397	(-0.0054905,0.0046966)	0.87855	0.92459	0.923637	2745	-0.27505	(-0.4227556,-0.1273450)	0.000265989	0.000876729	0.000921324	2539	0.070181	(-0.0012224,0.1415843)	0.0540492	0.107109	0.103618	1964	-0.0737831	(-0.1425330,-0.0050331)	0.0354369	0.0525351	0.055416	2537
NA	NA	QI5684	mz120_0659_rt6_29	HILIC	FALSE	120.066	6.29	TRUE	1.24855	(1.1420046,1.3650421)	1.0738e-06	4.0149e-06	4.38698e-06	2749	0.0222145	(0.0171306,0.0272983)	1.72853e-17	2.38807e-16	2.47871e-16	2745	-0.0092211	(-0.1622321,0.1437900)	0.905941	0.934731	0.939349	2539	0.181041	(0.1081879,0.2538950)	1.18436e-06	5.02165e-06	5.14658e-06	1964	-0.0086095	(-0.0796330,0.0624140)	0.812132	0.846913	0.854437	2537
PC(P-38:3)_PC(O-38:4)	HMDB0008359	QI10057	mz796_6175_rt6_91	HILIC	FALSE	796.617	6.91	TRUE	0.804524	(0.7370807,0.8781378)	1.12127e-06	4.18436e-06	4.5679e-06	2749	-0.0081186	(-0.0134489,-0.0027883)	0.00284651	0.00752375	0.00736804	2745	-0.391363	(-0.5497476,-0.2329780)	1.34041e-06	7.29363e-06	7.91007e-06	2539	-0.27116	(-0.3475741,-0.1947462)	4.64451e-12	3.57609e-11	3.80584e-11	1964	-0.630465	(-0.7001681,-0.5607616)	1.94677e-66	4.80039e-65	5.2673e-65	2537
NA	HMDB0004827	QI8788	proline_betaine	HILIC	TRUE	144.102	9.48	TRUE	1.25385	(1.1442542,1.3739445)	1.25035e-06	4.64825e-06	5.07933e-06	2749	0.0027523	(-0.0025143,0.0080189)	0.305583	0.436099	0.432582	2745	-0.113773	(-0.2689892,0.0414438)	0.150748	0.231786	0.237552	2539	-0.035572	(-0.1111145,0.0399704)	0.355864	0.48545	0.487401	1964	0.0733086	(0.0012281,0.1453890)	0.0462251	0.0667011	0.0699228	2537
S-Adenosylhomocysteine	NA	NA	s_adenosyl_l_homocysteine	AMIDE	TRUE	NA	NA	TRUE	1.24758	(1.1407645,1.3643933)	1.27344e-06	4.72507e-06	5.1559e-06	2749	0.0122239	(0.0069994,0.0174483)	4.68049e-06	1.85694e-05	1.88534e-05	2745	0.119824	(-0.0350549,0.2747033)	0.129372	0.203947	0.209442	2539	0.0682944	(-0.0065473,0.1431360)	0.0736713	0.140285	0.13614	1964	0.194703	(0.1231284,0.2662784)	1.04476e-07	2.67788e-07	2.94918e-07	2537
NA	NA	QI703	mz233_2263_rt1_84	HILIC	FALSE	233.226	1.84	TRUE	0.804417	(0.7366019,0.8784762)	1.27639e-06	4.72701e-06	5.1559e-06	2749	-5.77e-05	(-0.0053666,0.0052512)	0.982995	0.990111	0.990594	2745	-0.122935	(-0.2799656,0.0340955)	0.124875	0.198253	0.204186	2539	0.0392181	(-0.0360660,0.1145022)	0.307075	0.43855	0.438155	1964	-0.0170786	(-0.0900478,0.0558906)	0.646306	0.703747	0.711284	2537
SM(d18:1_20:2)	NA	QI9871	mz755_6039_rt7_26	HILIC	FALSE	755.604	7.26	TRUE	0.789904	(0.7179575,0.8690597)	1.29686e-06	4.78463e-06	5.22387e-06	2749	0.0192465	(0.0143752,0.0241179)	1.31369e-14	1.32594e-13	1.47174e-13	2745	-0.18126	(-0.3270525,-0.0354679)	0.0148394	0.031801	0.0337238	2539	0.102199	(0.0311042,0.1732945)	0.00486289	0.0125138	0.0122771	1964	-0.032951	(-0.1007305,0.0348284)	0.340533	0.413963	0.426256	2537
NA	HMDB0001565	TF27	phosphocholine	HILIC	TRUE	184.073	11.32	TRUE	1.25205	(1.1429822,1.3715349)	1.33981e-06	4.92443e-06	5.36672e-06	2749	-0.0019053	(-0.0072409,0.0034304)	0.483877	0.609303	0.60548	2745	0.441303	(0.2833689,0.5992370)	4.69399e-08	3.04796e-07	3.39959e-07	2539	0.220653	(0.1445401,0.2967658)	1.5003e-08	8.0958e-08	8.40402e-08	1964	0.413085	(0.3411889,0.4849820)	9.17963e-29	8.39527e-28	9.40256e-28	2537
NA	NA	QI4508	mz178_0896_rt5_43	HILIC	FALSE	178.09	5.43	TRUE	1.25344	(1.1437380,1.3736725)	1.33926e-06	4.92443e-06	5.36672e-06	2749	0.0036684	(-0.0015994,0.0089363)	0.172209	0.270535	0.265821	2745	0.0205906	(-0.1354967,0.1766779)	0.795906	0.849083	0.856854	2539	0.0050902	(-0.0704289,0.0806093)	0.894848	0.929791	0.930538	1964	-0.0184787	(-0.0909532,0.0539959)	0.617142	0.677814	0.685643	2537
NA	NA	QI263	mz311_2578_rt1_69	HILIC	FALSE	311.258	1.69	TRUE	1.26694	(1.1510230,1.3945352)	1.34569e-06	4.93673e-06	5.37526e-06	2749	0.0190748	(0.0137691,0.0243804)	2.26263e-12	1.82888e-11	2.02788e-11	2745	0.687441	(0.5302627,0.8446194)	1.67807e-17	2.49533e-16	2.89922e-16	2539	0.457392	(0.3837916,0.5309919)	5.46566e-33	1.97169e-31	2.37508e-31	1964	1.31018	(1.2564681,1.3638922)	0	0	0	2537
NA	NA	QI15498	mz175_1481_rt1_84	HILIC	FALSE	175.148	1.84	TRUE	0.804734	(0.7366948,0.8790575)	1.4357e-06	5.25704e-06	5.71887e-06	2749	-0.0022022	(-0.0075255,0.0031212)	0.417346	0.548192	0.542648	2745	-0.159463	(-0.3172967,-0.0016289)	0.0476838	0.0877205	0.0917912	2539	-0.0218605	(-0.0971542,0.0534331)	0.569149	0.68354	0.687003	1964	-0.0769885	(-0.1502274,-0.0037495)	0.0393771	0.0576308	0.0606517	2537
NA	NA	QI6489	mz647_5113_rt7_6	HILIC	FALSE	647.511	7.6	TRUE	0.792261	(0.7206704,0.8709643)	1.44283e-06	5.27323e-06	5.73135e-06	2749	0.0108982	(0.0059366,0.0158598)	1.71323e-05	6.29693e-05	6.29941e-05	2745	-0.166987	(-0.3137174,-0.0202571)	0.0257275	0.051297	0.0541751	2539	0.114635	(0.0429623,0.1863074)	0.00173368	0.00482458	0.00477178	1964	0.129652	(0.0616795,0.1976238)	0.000187901	0.000370852	0.000398595	2537
NA	NA	QI3368	mz162_0547_rt4_2	HILIC	FALSE	162.055	4.2	TRUE	1.25128	(1.1421822,1.3707987)	1.46361e-06	5.33916e-06	5.79784e-06	2749	0.01429	(0.0091999,0.0193801)	4.03696e-08	2.05326e-07	2.15204e-07	2745	0.329501	(0.1802494,0.4787522)	1.55561e-05	6.67473e-05	6.99293e-05	2539	0.240388	(0.1693151,0.3114617)	4.2363e-11	2.98997e-10	3.18055e-10	1964	0.200759	(0.1315490,0.2699688)	1.43272e-08	3.99276e-08	4.41832e-08	2537
SM(d18:1/16:1)	HMDB0029216	TF6	c16_1_sm	HILIC	TRUE	701.559	7.4	TRUE	0.787862	(0.7148868,0.8682873)	1.52572e-06	5.55533e-06	6.02722e-06	2749	0.0228471	(0.0180520,0.0276423)	1.88505e-20	3.60008e-19	3.75439e-19	2745	-0.116444	(-0.2605545,0.0276661)	0.113216	0.182873	0.189001	2539	-0.0226178	(-0.0921648,0.0469293)	0.523676	0.644709	0.64766	1964	-0.0548597	(-0.1217064,0.0119869)	0.107681	0.144964	0.151239	2537
TG(46:1)	HMDB0010412	QI165	mz794_7209_rt1_63	HILIC	FALSE	794.721	1.63	TRUE	1.25175	(1.1421028,1.3719140)	1.57953e-06	5.74053e-06	6.22265e-06	2749	0.0179293	(0.0125820,0.0232767)	5.82126e-11	4.04993e-10	4.41677e-10	2745	0.545302	(0.3856454,0.7049580)	2.60395e-11	2.4387e-10	2.68638e-10	2539	0.544498	(0.4688107,0.6201844)	4.01568e-43	3.72502e-41	4.4296e-41	1964	0.937384	(0.8721853,1.0025829)	2.5522e-152	1.3437e-150	1.66357e-150	2537
NA	NA	QI10834	mz330_2457_rt6_07	HILIC	FALSE	330.246	6.07	TRUE	1.25121	(1.1417180,1.3711920)	1.61359e-06	5.8534e-06	6.33942e-06	2749	0.0176891	(0.0123658,0.0230124)	8.57435e-11	5.72015e-10	6.1787e-10	2745	0.461609	(0.3078199,0.6153976)	4.48476e-09	3.49452e-08	3.85099e-08	2539	0.0960543	(0.0207513,0.1713573)	0.0124438	0.0290654	0.0281902	1964	0.0155895	(-0.0562125,0.0873916)	0.670328	0.725444	0.73266	2537
NA	NA	QI11519	mz786_5031_rt5_6	HILIC	FALSE	786.503	5.6	TRUE	1.28238	(1.1584429,1.4195777)	1.61813e-06	5.85895e-06	6.33989e-06	2749	0.0031751	(-0.0020699,0.0084200)	0.235329	0.354815	0.349339	2745	0.392205	(0.2378898,0.5465192)	6.6552e-07	3.79074e-06	4.16749e-06	2539	0.0404986	(-0.0380571,0.1190544)	0.312111	0.441855	0.441388	1964	0.605845	(0.5377584,0.6739325)	1.80461e-64	4.33998e-63	4.79224e-63	2537
NA	NA	QI12768	mz173_0669_rt4_29	HILIC	FALSE	173.067	4.29	TRUE	1.25972	(1.1462454,1.3844238)	1.63515e-06	5.9096e-06	6.38911e-06	2749	0.0391677	(0.0342924,0.0440430)	1.36829e-53	8.88476e-51	6.54043e-51	2745	0.252276	(0.1021078,0.4024447)	0.00100052	0.00287042	0.00302052	2539	0.536301	(0.4672421,0.6053592)	1.37315e-49	2.97211e-47	3.28183e-47	1964	0.519148	(0.4522320,0.5860634)	4.42792e-50	8.21485e-49	8.81894e-49	2537
NA	NA	QI3060	mz271_242_rt3_72	HILIC	FALSE	271.242	3.72	TRUE	1.26257	(1.1471007,1.3896726)	1.89488e-06	6.82297e-06	7.38385e-06	2749	0.0111781	(0.0059112,0.0164451)	3.25912e-05	0.000115432	0.00011399	2745	0.345954	(0.1924205,0.4994886)	1.03591e-05	4.63897e-05	4.90262e-05	2539	0.214403	(0.1381084,0.2906986)	4.03337e-08	2.08963e-07	2.15815e-07	1964	0.225633	(0.1545974,0.2966677)	5.49629e-10	1.7353e-09	1.89463e-09	2537
NA	NA	QI15434	mz467_3349_rt1_86	HILIC	FALSE	467.335	1.86	TRUE	0.817869	(0.7528978,0.8884472)	1.92926e-06	6.92828e-06	7.49745e-06	2749	-0.0029715	(-0.0083120,0.0023690)	0.275355	0.400591	0.396843	2745	-0.224782	(-0.3782374,-0.0713258)	0.00410857	0.0101826	0.0108904	2539	0.0292572	(-0.0413468,0.0998611)	0.4165	0.548946	0.551488	1964	-0.236926	(-0.3077208,-0.1661311)	6.39651e-11	2.18988e-10	2.42021e-10	2537
3',5' cyclic AMP	NA	NA	cyclic_amp	AMIDE	TRUE	NA	NA	TRUE	0.801361	(0.7314656,0.8779356)	1.97665e-06	7.06516e-06	7.66085e-06	2749	-0.0087588	(-0.0139849,-0.0035327)	0.00102795	0.00294045	0.00291897	2745	-0.402888	(-0.5576724,-0.2481039)	3.57153e-07	2.08929e-06	2.31745e-06	2539	-0.0032236	(-0.0796057,0.0731584)	0.934043	0.956633	0.956044	1964	0.0107345	(-0.0615306,0.0829995)	0.770862	0.811697	0.818827	2537
NA	NA	QI229	mz666_6185_rt1_68	HILIC	FALSE	666.619	1.68	TRUE	0.807484	(0.7392757,0.8819846)	2.04469e-06	7.29497e-06	7.9032e-06	2749	-0.0026697	(-0.0080409,0.0027015)	0.329843	0.462255	0.456559	2745	-0.369818	(-0.5281217,-0.2115137)	4.85372e-06	2.34298e-05	2.47695e-05	2539	-0.227661	(-0.3040589,-0.1512633)	5.94802e-09	3.38794e-08	3.55394e-08	1964	-0.842686	(-0.9088150,-0.7765575)	2.2872e-123	9.90103e-122	1.21476e-121	2537
NA	NA	QI6204	mz358_2947_rt7	HILIC	FALSE	358.295	7	TRUE	0.792799	(0.7202960,0.8725994)	2.08543e-06	7.42672e-06	8.039e-06	2749	-0.0043362	(-0.0094266,0.0007543)	0.094976	0.164019	0.16023	2745	-0.341875	(-0.4924623,-0.1912884)	8.88375e-06	4.06233e-05	4.28933e-05	2539	-0.0685389	(-0.1430169,0.0059390)	0.0712615	0.136229	0.132198	1964	-0.117532	(-0.1876001,-0.0474649)	0.00101831	0.00185216	0.00197599	2537
Uric acid	HMDB0000289	QI12689	urate	HILIC	TRUE	169.036	4.41	TRUE	1.25779	(1.1439820,1.3829259)	2.1397e-06	7.60609e-06	8.22609e-06	2749	0.0383293	(0.0335019,0.0431567)	1.95385e-52	9.51525e-50	7.00455e-50	2745	0.323036	(0.1748544,0.4712172)	1.98412e-05	8.34787e-05	8.75455e-05	2539	0.486472	(0.4183776,0.5545670)	1.41476e-42	1.19824e-40	1.35251e-40	1964	0.502962	(0.4367034,0.5692215)	4.20669e-48	7.25189e-47	7.73384e-47	2537
GlcCer(d18:1_22:0)	HMDB0004974	QI14620	mz784_6643_rt2_1	HILIC	FALSE	784.664	2.1	TRUE	0.811557	(0.7442271,0.8849773)	2.29845e-06	8.12592e-06	8.81277e-06	2749	-0.0098452	(-0.0151504,-0.0045400)	0.000278912	0.00087916	0.000875186	2745	-0.387052	(-0.5432011,-0.2309027)	1.24214e-06	6.81602e-06	7.42179e-06	2539	-0.116595	(-0.1923937,-0.0407958)	0.00258831	0.00698342	0.00689895	1964	-0.275511	(-0.3474903,-0.2035315)	8.41715e-14	3.48864e-13	3.79566e-13	2537
(E,E)-Trichostachine	HMDB0029374	QI13888	mz272_1279_rt2_55	HILIC	FALSE	272.128	2.55	TRUE	1.24869	(1.1387212,1.3692700)	2.33662e-06	8.2459e-06	8.93523e-06	2749	0.0208262	(0.0154997,0.0261528)	2.43546e-14	2.40826e-13	2.6865e-13	2745	0.373086	(0.2143300,0.5318426)	4.26231e-06	2.09143e-05	2.21455e-05	2539	0.299979	(0.2211589,0.3787985)	1.25552e-13	1.0727e-12	1.17674e-12	1964	0.165677	(0.0919463,0.2394083)	1.09556e-05	2.42793e-05	2.62715e-05	2537
NA	NA	QI433	mz461_3619_rt1_77	HILIC	FALSE	461.362	1.77	TRUE	0.810709	(0.7430633,0.8845130)	2.35223e-06	8.28597e-06	8.971e-06	2749	-0.0007859	(-0.0061203,0.0045486)	0.772707	0.845162	0.843916	2745	-0.192517	(-0.3484335,-0.0366003)	0.0155388	0.0331177	0.0351461	2539	-0.0439671	(-0.1165042,0.0285699)	0.234688	0.358285	0.353511	1964	-0.132938	(-0.2052832,-0.0605930)	0.0003203	0.000619607	0.000665667	2537
NA	NA	QI11716	mz188_0543_rt5_41	HILIC	FALSE	188.054	5.41	TRUE	1.26529	(1.1470618,1.3957018)	2.58538e-06	9.00952e-06	9.83404e-06	2749	0.0228497	(0.0175708,0.0281285)	3.40666e-17	4.57667e-16	4.74286e-16	2745	0.456919	(0.2986534,0.6151850)	1.67252e-08	1.14843e-07	1.2771e-07	2539	0.191664	(0.1136676,0.2696603)	1.55154e-06	6.43064e-06	6.54385e-06	1964	0.15462	(0.0809173,0.2283228)	4.01711e-05	8.41433e-05	9.08602e-05	2537
NA	NA	QI9832	mz717_5891_rt7_36	HILIC	FALSE	717.589	7.36	TRUE	0.808431	(0.7395555,0.8837220)	2.85833e-06	9.92518e-06	1.08435e-05	2749	0.0003359	(-0.0049384,0.0056102)	0.900632	0.939706	0.939041	2745	-0.304729	(-0.4605841,-0.1488742)	0.000129161	0.000457465	0.000474915	2539	-0.132683	(-0.2084321,-0.0569335)	0.000604446	0.00181707	0.00181334	1964	-0.36938	(-0.4405273,-0.2982328)	6.93884e-24	5.1007e-23	5.65358e-23	2537
NA	NA	QI15770	mz510_4154_rt1_77	HILIC	FALSE	510.415	1.77	TRUE	0.81814	(0.7520863,0.8899939)	2.96363e-06	1.02543e-05	1.12133e-05	2749	-0.0070868	(-0.0123506,-0.0018229)	0.00834086	0.0193659	0.0188954	2745	-0.203386	(-0.3555639,-0.0512078)	0.00882629	0.0199926	0.0212008	2539	0.0083163	(-0.0606763,0.0773088)	0.813149	0.875816	0.876571	1964	-0.256379	(-0.3264528,-0.1863042)	9.50328e-13	3.65136e-12	3.95006e-12	2537
PC(33:2)	NA	QI10100	mz744_5535_rt6_84	HILIC	FALSE	744.553	6.84	TRUE	0.80874	(0.7397428,0.8841719)	3.07631e-06	1.06065e-05	1.1609e-05	2749	-0.0176132	(-0.0228178,-0.0124085)	3.87812e-11	2.73717e-10	3.00607e-10	2745	-0.363002	(-0.5190187,-0.2069845)	5.29848e-06	2.52003e-05	2.65014e-05	2539	-0.122652	(-0.2000306,-0.0452732)	0.00190658	0.00526065	0.00518792	1964	-0.111275	(-0.1838755,-0.0386749)	0.00267753	0.00463629	0.00493519	2537
NA	NA	QI577	mz461_399_rt1_82	HILIC	FALSE	461.399	1.82	TRUE	0.816078	(0.7492473,0.8888697)	3.12641e-06	1.07602e-05	1.17671e-05	2749	0.0014622	(-0.0038866,0.0068110)	0.591984	0.703591	0.700417	2745	-0.337367	(-0.4925471,-0.1821859)	2.09036e-05	8.71953e-05	9.11117e-05	2539	0.0355428	(-0.0369193,0.1080050)	0.336188	0.468451	0.468963	1964	-0.0843553	(-0.1565397,-0.0121710)	0.0220146	0.0333731	0.0352726	2537
NA	NA	QI4473	mz257_113_rt5_41	HILIC	FALSE	257.113	5.41	TRUE	1.23102	(1.1279951,1.3434541)	3.14887e-06	1.08183e-05	1.18206e-05	2749	0.0106943	(0.0055929,0.0157957)	4.06218e-05	0.000142322	0.000140365	2745	0.0652239	(-0.0832653,0.2137130)	0.38914	0.490876	0.501823	2539	0.0058103	(-0.0618694,0.0734901)	0.866312	0.909679	0.909437	1964	0.19387	(0.1252772,0.2624619)	3.29389e-08	8.82599e-08	9.86104e-08	2537
NA	NA	QI15606	mz489_3565_rt1_82	HILIC	FALSE	489.356	1.82	TRUE	0.819454	(0.7531494,0.8915962)	3.73996e-06	1.27815e-05	1.40029e-05	2749	0.0016564	(-0.0036296,0.0069423)	0.538982	0.654574	0.651137	2745	-0.128251	(-0.2790775,0.0225759)	0.0955602	0.158023	0.163915	2539	0.0940659	(0.0252895,0.1628424)	0.007373	0.0182712	0.0178805	1964	-0.187761	(-0.2574876,-0.1180345)	1.39896e-07	3.55767e-07	3.90294e-07	2537
Quinolinic acid	NA	NA	quinolinic_acid	AMIDE	TRUE	NA	NA	TRUE	1.22677	(1.1249300,1.3378273)	3.79457e-06	1.29454e-05	1.41703e-05	2749	0.0304329	(0.0253413,0.0355245)	5.46012e-31	2.95453e-29	3.01147e-29	2745	0.206514	(0.0529561,0.3600717)	0.00841194	0.0191431	0.0203419	2539	0.390521	(0.3180315,0.4630096)	2.05033e-25	4.29467e-24	5.1582e-24	1964	0.306227	(0.2357290,0.3767251)	2.74871e-17	1.53424e-16	1.65616e-16	2537
NA	NA	QI589	mz241_1796_rt1_82	HILIC	FALSE	241.18	1.82	TRUE	0.80633	(0.7357697,0.8836582)	4.08276e-06	1.388e-05	1.5207e-05	2749	-0.0060787	(-0.0110842,-0.0010733)	0.0173212	0.0373249	0.0363137	2745	-0.192026	(-0.3385099,-0.0455412)	0.0102108	0.0228366	0.0241224	2539	0.0079384	(-0.0620098,0.0778866)	0.823891	0.880887	0.880393	1964	-0.276414	(-0.3437497,-0.2090787)	1.26483e-15	6.25352e-15	6.71765e-15	2537
Imidazole propionate	HMDB0002271	TF20	imidazole_propionate	HILIC	TRUE	141.066	7.63	TRUE	1.23305	(1.1276178,1.3483465)	4.35756e-06	1.47496e-05	1.61604e-05	2749	0.0073933	(0.0022227,0.0125639)	0.00508726	0.0124811	0.0121383	2745	0.13109	(-0.0233731,0.2855530)	0.0962	0.158812	0.164619	2539	0.111632	(0.0378882,0.1853757)	0.003026	0.00807486	0.00797662	1964	0.235598	(0.1645375,0.3066579)	9.55845e-11	3.22701e-10	3.56021e-10	2537
NA	NA	QI12890	mz484_2906_rt4_1	HILIC	FALSE	484.291	4.1	TRUE	1.25969	(1.1415139,1.3900935)	4.36128e-06	1.47496e-05	1.61604e-05	2749	-0.000455	(-0.0054506,0.0045405)	0.858255	0.909125	0.907624	2745	0.170747	(0.0233782,0.3181159)	0.0231716	0.046727	0.0495202	2539	-0.0148927	(-0.0855917,0.0558063)	0.679564	0.775507	0.775254	1964	0.0353064	(-0.0332339,0.1038467)	0.312546	0.384368	0.396629	2537
NA	NA	QI11242	mz585_2706_rt5_79	HILIC	FALSE	585.271	5.79	TRUE	0.81249	(0.7435758,0.8877918)	4.39376e-06	1.48337e-05	1.62388e-05	2749	-0.0041067	(-0.0094831,0.0012696)	0.134307	0.218754	0.214234	2745	0.18779	(0.0300134,0.3455668)	0.0196779	0.0410413	0.0436138	2539	-0.16798	(-0.2459732,-0.0899871)	2.51066e-05	9.03692e-05	9.1051e-05	1964	0.0198048	(-0.0534513,0.0930609)	0.596068	0.661242	0.670927	2537
NA	NA	QI9917	mz329_1416_rt7_11	HILIC	FALSE	329.142	7.11	TRUE	1.25733	(1.1401350,1.3865760)	4.49671e-06	1.51288e-05	1.65766e-05	2749	0.0162154	(0.0113348,0.0210961)	8.63877e-11	5.74346e-10	6.194e-10	2745	0.716662	(0.5774865,0.8558367)	1.57131e-23	3.36364e-22	4.1727e-22	2539	0.411638	(0.3457000,0.4775761)	2.90233e-33	1.08726e-31	1.34256e-31	1964	0.280765	(0.2157668,0.3457625)	4.08702e-17	2.24268e-16	2.41185e-16	2537
NA	NA	QI9512	mz518_3011_rt7_81	HILIC	FALSE	518.301	7.81	TRUE	0.813439	(0.7446920,0.8885324)	4.57804e-06	1.53759e-05	1.68331e-05	2749	0.0088292	(0.0034762,0.0141822)	0.00123453	0.00347524	0.00343751	2745	-0.478212	(-0.6365930,-0.3198317)	3.63919e-09	2.85853e-08	3.14373e-08	2539	-0.155219	(-0.2331753,-0.0772625)	9.74598e-05	0.000327331	0.000325775	1964	-0.237685	(-0.3110967,-0.1642743)	2.56223e-10	8.34653e-10	9.18559e-10	2537
NA	NA	QI8792	mz291_0121_rt9_46	HILIC	FALSE	291.012	9.46	TRUE	0.819122	(0.7520968,0.8921204)	4.63141e-06	1.55284e-05	1.69858e-05	2749	-0.0047274	(-0.0100772,0.0006224)	0.0832585	0.147042	0.143847	2745	-0.0981443	(-0.2528879,0.0565993)	0.213733	0.303463	0.309902	2539	-0.0374218	(-0.1099591,0.0351155)	0.311775	0.441855	0.441388	1964	0.0317807	(-0.0401289,0.1036902)	0.386229	0.460902	0.472745	2537
NA	NA	QI370	mz281_2471_rt1_76	HILIC	FALSE	281.247	1.76	TRUE	0.802829	(0.7307942,0.8819645)	4.68087e-06	1.5631e-05	1.70555e-05	2749	0.0004182	(-0.0044721,0.0053085)	0.866842	0.916228	0.914681	2745	-0.245946	(-0.3889643,-0.1029276)	0.000757106	0.00226203	0.00239139	2539	0.0223354	(-0.0472749,0.0919457)	0.529246	0.650045	0.65257	1964	-0.198011	(-0.2641870,-0.1318344)	5.00586e-09	1.4511e-08	1.5952e-08	2537
NA	NA	QI9828	mz715_5733_rt7_37	HILIC	FALSE	715.573	7.37	TRUE	0.81696	(0.7492388,0.8908032)	4.6717e-06	1.5631e-05	1.70555e-05	2749	0.0083483	(0.0031618,0.0135347)	0.00161571	0.0044644	0.00440481	2745	-0.308651	(-0.4634252,-0.1538771)	9.45487e-05	0.000346857	0.000359636	2539	-0.0568124	(-0.1337760,0.0201512)	0.147865	0.251397	0.246536	1964	-0.206545	(-0.2781888,-0.1349020)	1.7512e-08	4.8047e-08	5.35442e-08	2537
NA	NA	QI695	mz147_1167_rt1_84	HILIC	FALSE	147.117	1.84	TRUE	0.812877	(0.7438875,0.8882649)	4.6861e-06	1.5631e-05	1.70555e-05	2749	-0.0002312	(-0.0055590,0.0050966)	0.932188	0.95826	0.958249	2745	-0.16849	(-0.3272959,-0.0096846)	0.0375814	0.0715302	0.0750581	2539	0.0048397	(-0.0713615,0.0810409)	0.900885	0.934282	0.934422	1964	-0.176835	(-0.2502511,-0.1034192)	2.44872e-06	5.69905e-06	6.19306e-06	2537
NA	NA	QI9299	mz391_0388_rt8_2	HILIC	FALSE	391.039	8.2	TRUE	0.812916	(0.7439032,0.8883318)	4.74162e-06	1.57892e-05	1.72139e-05	2749	-0.0118218	(-0.0171881,-0.0064556)	1.61805e-05	5.98095e-05	5.98011e-05	2745	-0.314785	(-0.4753755,-0.1541936)	0.00012418	0.000442235	0.00046014	2539	-0.0361624	(-0.1154722,0.0431474)	0.371311	0.501953	0.505082	1964	-0.285649	(-0.3597251,-0.2115737)	5.53323e-14	2.32802e-13	2.52696e-13	2537
NA	NA	QI15630	mz549_452_rt1_82	HILIC	FALSE	549.452	1.82	TRUE	0.811305	(0.7417084,0.8874314)	4.88267e-06	1.62311e-05	1.76812e-05	2749	-0.0084786	(-0.0134847,-0.0034726)	0.000908749	0.0026187	0.00260109	2745	-0.316109	(-0.4613687,-0.1708497)	2.05165e-05	8.59487e-05	8.99714e-05	2539	-0.0820842	(-0.1509405,-0.0132279)	0.0194907	0.0437418	0.04222	1964	-0.295607	(-0.3623889,-0.2288254)	6.966e-18	4.00288e-17	4.32435e-17	2537
NA	NA	QI14643	mz157_1223_rt2_1	HILIC	FALSE	157.122	2.1	TRUE	0.807874	(0.7371387,0.8853977)	5.03072e-06	1.66948e-05	1.81714e-05	2749	-0.0008702	(-0.0059411,0.0042008)	0.736544	0.814295	0.81309	2745	-0.262375	(-0.4104225,-0.1143285)	0.000519059	0.00161007	0.00168401	2539	0.0408548	(-0.0306634,0.1123730)	0.262713	0.387407	0.384811	1964	-0.189677	(-0.2582164,-0.1211378)	6.2874e-08	1.6418e-07	1.81777e-07	2537
NA	NA	QI15459	mz505_351_rt1_85	HILIC	FALSE	505.351	1.85	TRUE	0.822356	(0.7560815,0.8944398)	5.06262e-06	1.67436e-05	1.82407e-05	2749	0.0006964	(-0.0045611,0.0059539)	0.79509	0.861901	0.8592	2745	-0.132086	(-0.2786623,0.0144910)	0.0773419	0.132145	0.137433	2539	0.107604	(0.0409928,0.1742147)	0.00155807	0.00439236	0.00435531	1964	-0.187058	(-0.2547959,-0.1193202)	6.70444e-08	1.74602e-07	1.93056e-07	2537
LPE(18:0)	HMDB0011130	QI5818	c18_0_lpe_a	HILIC	TRUE	482.324	6.39	TRUE	1.23294	(1.1267122,1.3491755)	5.2298e-06	1.72672e-05	1.87958e-05	2749	-0.0057225	(-0.0110147,-0.0004303)	0.034075	0.0674574	0.0657652	2745	0.229568	(0.0714223,0.3877141)	0.004456	0.010945	0.0117165	2539	-0.0835316	(-0.1605055,-0.0065577)	0.0334404	0.0705763	0.067731	1964	0.668291	(0.5995388,0.7370430)	8.5072e-76	2.51091e-74	2.83705e-74	2537
NA	NA	QI6390	mz680_2138_rt7_43	HILIC	FALSE	680.214	7.43	TRUE	0.818348	(0.7507101,0.8920793)	5.25e-06	1.73046e-05	1.88212e-05	2749	-0.0060343	(-0.0113829,-0.0006857)	0.0270334	0.0548553	0.0536924	2745	-0.329232	(-0.4877293,-0.1707342)	4.77971e-05	0.000183646	0.000191455	2539	-0.143348	(-0.2210010,-0.0656950)	0.000301682	0.000936423	0.00092898	1964	-0.229196	(-0.3025627,-0.1558285)	1.04322e-09	3.22059e-09	3.51168e-09	2537
NA	NA	QI5904	mz498_2568_rt6_47	HILIC	FALSE	498.257	6.47	TRUE	1.25508	(1.1380097,1.3842016)	5.42586e-06	1.7854e-05	1.94032e-05	2749	-0.0074056	(-0.0127262,-0.0020850)	0.00638908	0.0152898	0.0148733	2745	0.162924	(0.0014023,0.3244457)	0.0480454	0.0882948	0.0923554	2539	-0.132748	(-0.2124155,-0.0530803)	0.00110242	0.00319571	0.00317444	1964	0.453138	(0.3801423,0.5261337)	3.59986e-33	4.00716e-32	4.41214e-32	2537
NA	NA	QI2457	mz151_0056_rt2_7	HILIC	FALSE	151.006	2.7	TRUE	1.29399	(1.1578483,1.4461299)	5.51782e-06	1.8126e-05	1.9683e-05	2749	0.0118875	(0.0065213,0.0172538)	1.45177e-05	5.40736e-05	5.42145e-05	2745	0.46888	(0.3067109,0.6310491)	1.59384e-08	1.10491e-07	1.2288e-07	2539	0.168769	(0.0875327,0.2500057)	4.79831e-05	0.000168416	0.000169061	1964	0.233408	(0.1581459,0.3086700)	1.37263e-09	4.19104e-09	4.56694e-09	2537
NA	NA	QI2509	mz223_0267_rt2_77	HILIC	FALSE	223.027	2.77	TRUE	1.29012	(1.1558042,1.4400510)	5.5906e-06	1.83342e-05	1.98931e-05	2749	0.0106575	(0.0052964,0.0160187)	9.93221e-05	0.000333011	0.00032742	2745	0.484912	(0.3233238,0.6465006)	4.5198e-09	3.5078e-08	3.85797e-08	2539	0.192827	(0.1123846,0.2732684)	2.76781e-06	1.11169e-05	1.13078e-05	1964	0.238757	(0.1637569,0.3137575)	5.03755e-10	1.59684e-09	1.74621e-09	2537
N2,N2-Dimethylguanosine	HMDB0004824	QI11589	n2_n2_dimethylguanosine	HILIC	TRUE	312.13	5.51	TRUE	1.22201	(1.1205546,1.3326459)	5.78914e-06	1.8858e-05	2.05486e-05	2749	0.0260493	(0.0210256,0.0310730)	7.30323e-24	2.03238e-22	2.09457e-22	2745	0.22053	(0.0732388,0.3678216)	0.00335539	0.00851081	0.00909571	2539	0.227625	(0.1596325,0.2956176)	6.61724e-11	4.53887e-10	4.79249e-10	1964	0.224821	(0.1566419,0.2929991)	1.20242e-10	4.05245e-10	4.46702e-10	2537
NA	HMDB0000026	QI12797	n_carbamoyl_beta_alanine	HILIC	TRUE	133.061	4.23	TRUE	1.23139	(1.1254174,1.3473507)	5.80841e-06	1.8858e-05	2.05661e-05	2749	0.0030458	(-0.0020644,0.0081559)	0.242624	0.363061	0.358637	2745	0.0040363	(-0.1479348,0.1560073)	0.958469	0.973968	0.976168	2539	0.101548	(0.0301250,0.1729714)	0.00534871	0.0136378	0.0133392	1964	0.0787685	(0.0080952,0.1494417)	0.0289427	0.0432697	0.0456588	2537
NA	NA	QI647	mz447_3466_rt1_83	HILIC	FALSE	447.347	1.83	TRUE	0.815567	(0.7463648,0.8911857)	6.59285e-06	2.12279e-05	2.32861e-05	2749	-0.0047542	(-0.0101302,0.0006219)	0.0830314	0.146908	0.143796	2745	-0.150975	(-0.3036420,0.0016931)	0.0525935	0.0950391	0.0993664	2539	-0.0351817	(-0.1084873,0.0381238)	0.346702	0.477973	0.478509	1964	-0.181338	(-0.2519782,-0.1106978)	5.14726e-07	1.24868e-06	1.36184e-06	2537
Acisoga	HMDB0061384	QI11163	mz230_1862_rt5_86	HILIC	FALSE	230.186	5.86	TRUE	1.23497	(1.1264884,1.3538913)	6.82533e-06	2.1904e-05	2.4048e-05	2749	0.0118518	(0.0065777,0.0171259)	1.09166e-05	4.16971e-05	4.19689e-05	2745	0.184422	(0.0286624,0.3401811)	0.0203258	0.0420772	0.0447043	2539	0.0502096	(-0.0250616,0.1254807)	0.190959	0.306415	0.301249	1964	0.130658	(0.0583632,0.2029530)	0.000401356	0.000768017	0.000823383	2537
Pipecolic acid	HMDB0000716	QI6894	pipecolic_acid	HILIC	TRUE	130.086	8.2	TRUE	1.21477	(1.1159279,1.3223723)	7.02232e-06	2.24991e-05	2.46814e-05	2749	-0.0022255	(-0.0075837,0.0031327)	0.415477	0.547227	0.541605	2745	0.373939	(0.2146997,0.5331781)	4.33352e-06	2.12103e-05	2.24342e-05	2539	-0.0915927	(-0.1702316,-0.0129537)	0.0224646	0.0496281	0.0479379	1964	0.034005	(-0.0401004,0.1081104)	0.36831	0.442063	0.453743	2537
NA	NA	QI11516	mz226_0821_rt5_6	HILIC	FALSE	226.082	5.6	TRUE	1.21451	(1.1154207,1.3223950)	7.62252e-06	2.43421e-05	2.67254e-05	2749	0.0112078	(0.0059332,0.0164824)	3.18865e-05	0.000113142	0.000111798	2745	0.0967092	(-0.0592694,0.2526879)	0.224178	0.315306	0.322115	2539	0.110647	(0.0355670,0.1857272)	0.00389202	0.0102455	0.0100925	1964	0.0543223	(-0.0181417,0.1267863)	0.141691	0.186875	0.194249	2537
NA	NA	QI8965	mz110_009_rt8_82	HILIC	FALSE	110.009	8.82	TRUE	0.818893	(0.7500030,0.8941099)	8.33651e-06	2.64919e-05	2.91575e-05	2749	-0.0056504	(-0.0109934,-0.0003075)	0.0382031	0.0746701	0.0727792	2745	-0.419967	(-0.5790668,-0.2608665)	2.44385e-07	1.47388e-06	1.63761e-06	2539	-0.0527523	(-0.1304015,0.0248970)	0.182898	0.296164	0.291742	1964	0.0294265	(-0.0449191,0.1037720)	0.43774	0.512255	0.523214	2537
NA	NA	QI13392	mz234_0432_rt3_22	HILIC	FALSE	234.043	3.22	TRUE	1.23861	(1.1272620,1.3609578)	8.49003e-06	2.69358e-05	2.96221e-05	2749	-0.0134096	(-0.0186237,-0.0081955)	4.88532e-07	2.20292e-06	2.28194e-06	2745	-0.0055996	(-0.1565407,0.1453415)	0.942014	0.961763	0.964891	2539	-0.0459121	(-0.1177520,0.0259278)	0.210222	0.331589	0.325549	1964	0.0460647	(-0.0241292,0.1162585)	0.198268	0.255103	0.264234	2537
NA	NA	QI6488	mz569_9743_rt7_6	HILIC	FALSE	569.974	7.6	TRUE	1.22699	(1.1212036,1.3427590)	8.71248e-06	2.75966e-05	3.03245e-05	2749	0.0129583	(0.0076542,0.0182624)	1.75288e-06	7.3118e-06	7.48104e-06	2745	0.538987	(0.3819566,0.6960167)	2.08275e-11	1.96951e-10	2.18005e-10	2539	0.29126	(0.2141363,0.3683842)	1.91772e-13	1.61719e-12	1.76283e-12	1964	0.27736	(0.2045974,0.3501231)	1.06031e-13	4.36677e-13	4.73671e-13	2537
NA	NA	QI3710	mz330_2787_rt4_69	HILIC	FALSE	330.279	4.69	TRUE	0.826682	(0.7596251,0.8996584)	1.0345e-05	3.25558e-05	3.59194e-05	2749	-0.0137065	(-0.0190500,-0.0083631)	5.22829e-07	2.34671e-06	2.43421e-06	2745	-0.33249	(-0.4921113,-0.1728686)	4.55345e-05	0.000175299	0.000182903	2539	-0.322273	(-0.3985604,-0.2459848)	2.16483e-16	2.31708e-15	2.52387e-15	1964	-0.482053	(-0.5540179,-0.4100881)	3.5687e-38	4.54368e-37	5.06685e-37	2537
Amino uric acid	NA	QI2435	mz184_0465_rt2_67	HILIC	FALSE	184.047	2.67	TRUE	1.23273	(1.1232210,1.3529145)	1.04293e-05	3.27682e-05	3.61247e-05	2749	0.0359112	(0.0309500,0.0408723)	3.55598e-44	4.94789e-42	5.09928e-42	2745	0.279696	(0.1270159,0.4323760)	0.000334148	0.00106883	0.00112217	2539	0.424948	(0.3536817,0.4962138)	1.38178e-30	4.01747e-29	4.83286e-29	1964	0.460721	(0.3919117,0.5295310)	3.82463e-38	4.83791e-37	5.37698e-37	2537
PC(35:2)	NA	QI10116	mz772_5833_rt6_78	HILIC	FALSE	772.583	6.78	TRUE	0.821453	(0.7525326,0.8966855)	1.08748e-05	3.41129e-05	3.7577e-05	2749	-0.031077	(-0.0363147,-0.0258392)	1.4294e-30	7.32756e-29	7.5917e-29	2745	-0.462832	(-0.6225647,-0.3031002)	1.48507e-08	1.03689e-07	1.15113e-07	2539	-0.46356	(-0.5388675,-0.3882520)	2.03471e-32	7.07788e-31	8.3365e-31	1964	-0.400319	(-0.4733452,-0.3272923)	2.19388e-26	1.81859e-25	2.02969e-25	2537
Trigonelline	HMDB0000875	QI7318	trigonelline	HILIC	TRUE	138.055	9.11	TRUE	1.23415	(1.1237084,1.3554472)	1.09057e-05	3.41548e-05	3.75932e-05	2749	-0.008714	(-0.0137080,-0.0037200)	0.000632028	0.00187396	0.00185343	2745	-0.128195	(-0.2715614,0.0151716)	0.079656	0.135064	0.140345	2539	-0.183535	(-0.2529534,-0.1141170)	2.38078e-07	1.09381e-06	1.13048e-06	1964	-0.0605508	(-0.1271359,0.0060342)	0.0746741	0.103904	0.109268	2537
3-Indolepropionic acid	NA	NA	indole_3_propanoic_acid	AMIDE	TRUE	NA	NA	TRUE	0.823465	(0.7550951,0.8980248)	1.12269e-05	3.51043e-05	3.86076e-05	2749	-0.0172471	(-0.0225408,-0.0119535)	1.96081e-10	1.29042e-09	1.38512e-09	2745	-0.457595	(-0.6174280,-0.2977616)	2.19261e-08	1.48306e-07	1.65484e-07	2539	-0.106223	(-0.1853997,-0.0270457)	0.00857803	0.0208095	0.0202651	1964	-0.280104	(-0.3538752,-0.2063330)	1.31736e-13	5.40256e-13	5.84859e-13	2537
NA	NA	QI13749	mz181_0528_rt2_68	HILIC	FALSE	181.053	2.68	TRUE	0.814973	(0.7438000,0.8929567)	1.14281e-05	3.56191e-05	3.92055e-05	2749	0.0043172	(-0.0008315,0.0094660)	0.100256	0.171465	0.167561	2745	-0.250033	(-0.4020893,-0.0979775)	0.00127836	0.00357577	0.00378286	2539	0.0786338	(0.0072699,0.1499976)	0.0308192	0.0658883	0.0633736	1964	0.1475	(0.0769278,0.2180728)	4.29125e-05	8.95965e-05	9.66036e-05	2537
NA	NA	QI6599	mz544_3158_rt7_74	HILIC	FALSE	544.316	7.74	TRUE	0.826304	(0.7587306,0.8998957)	1.17016e-05	3.62973e-05	3.99526e-05	2749	4.07e-05	(-0.0053372,0.0054186)	0.988155	0.993767	0.993699	2745	-0.55096	(-0.7104689,-0.3914513)	1.56078e-11	1.49039e-10	1.6579e-10	2539	-0.241221	(-0.3191843,-0.1632584)	1.55088e-09	9.50036e-09	1.00178e-08	1964	-0.34944	(-0.4230664,-0.2758126)	2.7689e-20	1.73994e-19	1.91817e-19	2537
Proline	HMDB0000162	QI6976	mz138_0524_rt8_31	HILIC	FALSE	138.052	8.31	TRUE	1.22574	(1.1191099,1.3425289)	1.16822e-05	3.62949e-05	3.99526e-05	2749	0.0178175	(0.0124956,0.0231393)	6.2071e-11	4.28774e-10	4.6602e-10	2745	0.342797	(0.1851883,0.5004054)	2.07288e-05	8.66517e-05	9.06253e-05	2539	0.336508	(0.2614624,0.4115529)	3.09443e-18	4.01863e-17	4.57465e-17	1964	0.204156	(0.1311227,0.2771897)	4.63532e-08	1.23187e-07	1.37336e-07	2537
NA	NA	QI10023	mz394_2947_rt6_95	HILIC	FALSE	394.295	6.95	TRUE	0.820466	(0.7508067,0.8965888)	1.23502e-05	3.81876e-05	4.2067e-05	2749	0.0163399	(0.0111428,0.0215370)	8.08971e-10	5.00278e-09	5.27302e-09	2745	0.0006248	(-0.1484803,0.1497299)	0.993445	0.997882	0.998318	2539	0.174077	(0.1020537,0.2461001)	2.29025e-06	9.27527e-06	9.43741e-06	1964	0.0897876	(0.0205864,0.1589887)	0.0110104	0.0175374	0.018619	2537
NA	NA	QI3783	mz245_1494_rt4_74	HILIC	FALSE	245.149	4.74	TRUE	0.817982	(0.7474655,0.8951502)	1.25361e-05	3.8701e-05	4.2599e-05	2749	0.0132994	(0.0080677,0.0185311)	6.59581e-07	2.9268e-06	3.03154e-06	2745	-0.126485	(-0.2787838,0.0258145)	0.103537	0.169061	0.174879	2539	-0.0747376	(-0.1486473,-0.0008279)	0.0474908	0.0957682	0.0926555	1964	-0.0124569	(-0.0833087,0.0583950)	0.730306	0.777397	0.784464	2537
NA	NA	QI536	mz239_2003_rt1_81	HILIC	FALSE	239.2	1.81	TRUE	0.822501	(0.7534352,0.8978988)	1.26164e-05	3.88873e-05	4.27705e-05	2749	0.0001312	(-0.0050824,0.0053449)	0.960637	0.975407	0.975781	2745	-0.267843	(-0.4215114,-0.1141746)	0.000641173	0.00196384	0.00206153	2539	0.006153	(-0.0669182,0.0792242)	0.868849	0.910677	0.910842	1964	-0.195835	(-0.2668797,-0.1247896)	7.07857e-08	1.841e-07	2.0342e-07	2537
NA	NA	QI13720	mz206_0812_rt2_73	HILIC	FALSE	206.081	2.73	TRUE	1.22959	(1.1205774,1.3492006)	1.27996e-05	3.93896e-05	4.32892e-05	2749	0.0011744	(-0.0040235,0.0063724)	0.657777	0.753292	0.750997	2745	0.203724	(0.0503669,0.3570816)	0.00924341	0.0208646	0.0220917	2539	0.0315629	(-0.0418188,0.1049446)	0.39903	0.531313	0.532287	1964	0.213535	(0.1426281,0.2844428)	3.99418e-09	1.17533e-08	1.29292e-08	2537
PC(35:3)	NA	QI6166	mz770_5653_rt6_94	HILIC	FALSE	770.565	6.94	TRUE	0.822774	(0.7536287,0.8982634)	1.32735e-05	4.07836e-05	4.47864e-05	2749	-0.0211273	(-0.0263839,-0.0158706)	4.64758e-15	4.84144e-14	5.46281e-14	2745	-0.311655	(-0.4694917,-0.1538183)	0.000110731	0.000397978	0.000413511	2539	-0.185013	(-0.2615452,-0.1084818)	2.27891e-06	9.24858e-06	9.41774e-06	1964	0.105361	(0.0320524,0.1786688)	0.00486594	0.00814334	0.00868961	2537
NA	NA	QI11091	mz140_0815_rt5_92	HILIC	FALSE	140.082	5.92	TRUE	1.22	(1.1155527,1.3342355)	1.33365e-05	4.09126e-05	4.48933e-05	2749	0.0097778	(0.0044317,0.0151239)	0.000341296	0.00106375	0.00105706	2745	0.217142	(0.0615308,0.3727533)	0.00625738	0.014686	0.0155783	2539	0.112883	(0.0365222,0.1892440)	0.00378312	0.00997228	0.00982789	1964	0.0527348	(-0.0195998,0.1250695)	0.152963	0.20025	0.208111	2537
NA	NA	QI15450	mz411_3829_rt1_85	HILIC	FALSE	411.383	1.85	TRUE	0.822139	(0.7526628,0.8980275)	1.37673e-05	4.20356e-05	4.62349e-05	2749	0.0010547	(-0.0040748,0.0061842)	0.686851	0.772242	0.770089	2745	-0.156287	(-0.3057481,-0.0068256)	0.0404231	0.0760814	0.0796246	2539	-0.0016426	(-0.0737753,0.0704900)	0.964383	0.977938	0.976642	1964	-0.160402	(-0.2297469,-0.0910565)	6.00766e-06	1.36876e-05	1.48791e-05	2537
CAR(10:0)	HMDB0000651	QI6344	c10_carnitine	HILIC	TRUE	316.248	7.32	TRUE	0.817813	(0.7463118,0.8961647)	1.64328e-05	4.9867e-05	5.50576e-05	2749	-0.0011363	(-0.0064424,0.0041698)	0.67458	0.763337	0.761158	2745	-0.0195972	(-0.1739389,0.1347444)	0.803395	0.854265	0.861038	2539	-0.0394055	(-0.1150046,0.0361935)	0.306789	0.438463	0.438155	1964	-0.0079692	(-0.0796373,0.0636989)	0.827412	0.860544	0.867331	2537
NA	NA	QI1697	mz373_2735_rt2_11	HILIC	FALSE	373.274	2.11	TRUE	1.21873	(1.1137016,1.3336585)	1.69206e-05	5.12618e-05	5.65598e-05	2749	-0.0045774	(-0.0098722,0.0007174)	0.0901591	0.157799	0.154466	2745	0.334865	(0.1769840,0.4927459)	3.30185e-05	0.000132346	0.000138446	2539	0.183113	(0.1059397,0.2602871)	3.48419e-06	1.38232e-05	1.40742e-05	1964	0.0740602	(0.0005675,0.1475528)	0.0482583	0.0692757	0.0726916	2537
NA	NA	QI15521	mz554_441_rt1_84	HILIC	FALSE	554.441	1.84	TRUE	0.823939	(0.7542555,0.9000593)	1.74348e-05	5.27376e-05	5.8143e-05	2749	-0.0057541	(-0.0108798,-0.0006284)	0.0278021	0.056181	0.0549149	2745	-0.258423	(-0.4091466,-0.1076993)	0.000785124	0.00232435	0.00245823	2539	0.0442873	(-0.0276591,0.1162337)	0.227493	0.350605	0.344142	1964	-0.250188	(-0.3196869,-0.1806881)	2.15766e-12	8.11413e-12	8.84024e-12	2537
LPC(20:2)	NA	QI6693	mz586_3269_rt7_83	HILIC	FALSE	586.327	7.83	TRUE	0.825033	(0.7556438,0.9007952)	1.78042e-05	5.37714e-05	5.92372e-05	2749	-0.0201876	(-0.0255125,-0.0148627)	1.40222e-13	1.31323e-12	1.45709e-12	2745	-0.508315	(-0.6680808,-0.3485491)	5.14962e-10	4.4387e-09	4.89043e-09	2539	-0.334112	(-0.4118146,-0.2564094)	6.44978e-17	7.30475e-16	7.96759e-16	1964	-0.0874035	(-0.1620453,-0.0127616)	0.021748	0.0330719	0.0350018	2537
PE(P-36:2)/PE(O-36:3)	HMDB0011441	QI4677	c36_3_pe_plasmalogen	HILIC	TRUE	728.558	5.6	TRUE	0.826379	(0.7573602,0.9016883)	1.82251e-05	5.49173e-05	6.04068e-05	2749	-0.0140491	(-0.0193882,-0.0087099)	2.65194e-07	1.23293e-06	1.28476e-06	2745	-0.425151	(-0.5852240,-0.2650772)	2.0612e-07	1.25085e-06	1.39423e-06	2539	-0.233598	(-0.3111958,-0.1560011)	4.17406e-09	2.41278e-08	2.52557e-08	1964	-0.677702	(-0.7475407,-0.6078633)	1.45972e-75	4.24408e-74	4.75736e-74	2537
NA	NA	QI14818	mz199_0462_rt2_07	HILIC	FALSE	199.046	2.07	TRUE	1.2265	(1.1171586,1.3465433)	1.824e-05	5.49173e-05	6.04068e-05	2749	0.0399162	(0.0349835,0.0448489)	2.59539e-54	2.52791e-51	1.86089e-51	2745	0.281805	(0.1291554,0.4344551)	0.000300377	0.000967422	0.00101617	2539	0.519003	(0.4485365,0.5894705)	5.12824e-45	5.2578e-43	6.68536e-43	1964	0.492956	(0.4245292,0.5613832)	1.13578e-43	1.77e-42	1.91613e-42	2537
Glycocholic acid	HMDB0000138	QI4559	glycocholate	HILIC	TRUE	466.316	5.47	TRUE	1.21611	(1.1116607,1.3303710)	1.95206e-05	5.86823e-05	6.44989e-05	2749	0.006454	(0.0010863,0.0118216)	0.0184601	0.0395168	0.0384206	2745	0.307679	(0.1466174,0.4687396)	0.000183719	0.00063119	0.000655356	2539	0.22402	(0.1436803,0.3043604)	5.11823e-08	2.59644e-07	2.70832e-07	1964	0.146426	(0.0715755,0.2212759)	0.000128102	0.000257261	0.000276238	2537
NA	NA	QI15633	mz197_1536_rt1_82	HILIC	FALSE	197.154	1.82	TRUE	0.815424	(0.7425044,0.8955046)	1.96274e-05	5.89124e-05	6.47027e-05	2749	0.0002745	(-0.0046179,0.0051670)	0.9124	0.947417	0.945362	2745	-0.190545	(-0.3340809,-0.0470083)	0.00929245	0.020951	0.022172	2539	0.0581528	(-0.0111458,0.1274514)	0.0999767	0.182355	0.178095	1964	-0.184725	(-0.2511315,-0.1183195)	5.37927e-08	1.41415e-07	1.57105e-07	2537
NA	NA	QI7121	mz230_0046_rt8_62	HILIC	FALSE	230.005	8.62	TRUE	0.832009	(0.7645903,0.9053720)	1.99304e-05	5.97299e-05	6.55509e-05	2749	-0.0047987	(-0.0101306,0.0005331)	0.0777121	0.138756	0.135406	2745	-0.0371433	(-0.1874909,0.1132044)	0.628116	0.716796	0.729327	2539	-0.0601256	(-0.1306217,0.0103704)	0.094551	0.174418	0.169907	1964	-0.114252	(-0.1839232,-0.0445806)	0.00131799	0.00237506	0.00253351	2537
NA	NA	QI15537	mz105_0702_rt1_83	HILIC	FALSE	105.07	1.83	TRUE	0.825912	(0.7561088,0.9021585)	2.18222e-05	6.51988e-05	7.16088e-05	2749	-0.0009546	(-0.0062126,0.0043034)	0.721878	0.799897	0.798745	2745	-0.173524	(-0.3284730,-0.0185756)	0.0281839	0.0557383	0.058915	2539	0.0341427	(-0.0401913,0.1084767)	0.367807	0.49844	0.501076	1964	-0.150097	(-0.2218280,-0.0783659)	4.2039e-05	8.78669e-05	9.4786e-05	2537
NA	NA	QI3067	mz269_1381_rt3_73	HILIC	FALSE	269.138	3.73	TRUE	1.21126	(1.1086295,1.3234006)	2.2077e-05	6.58591e-05	7.22795e-05	2749	0.0075831	(0.0022411,0.0129250)	0.00541492	0.0131034	0.0127504	2745	0.264225	(0.1068718,0.4215781)	0.00100588	0.00287732	0.00303032	2539	0.325944	(0.2501327,0.4017560)	6.50075e-17	7.31992e-16	7.96759e-16	1964	0.198231	(0.1254712,0.2709916)	9.99119e-08	2.56766e-07	2.8315e-07	2537
NA	NA	QI12448	mz306_2788_rt4_71	HILIC	FALSE	306.279	4.71	TRUE	0.827924	(0.7585755,0.9036129)	2.3287e-05	6.92566e-05	7.60673e-05	2749	-0.0193795	(-0.0246791,-0.0140800)	9.57298e-13	8.038e-12	8.85655e-12	2745	-0.39929	(-0.5585852,-0.2399950)	9.4352e-07	5.29105e-06	5.8069e-06	2539	-0.359931	(-0.4357089,-0.2841530)	3.16277e-20	4.70311e-19	5.46435e-19	1964	-0.604683	(-0.6751177,-0.5342481)	2.31974e-60	5.19408e-59	5.73536e-59	2537
NA	NA	QI614	mz475_3782_rt1_83	HILIC	FALSE	475.378	1.83	TRUE	0.832085	(0.7640880,0.9061338)	2.37805e-05	7.06165e-05	7.75028e-05	2749	0.0011841	(-0.0041277,0.0064959)	0.662067	0.75554	0.754094	2745	-0.188058	(-0.3414932,-0.0346221)	0.0163162	0.0346608	0.0367307	2539	0.0533019	(-0.0173926,0.1239964)	0.139387	0.239441	0.234327	1964	-0.188498	(-0.2595023,-0.1174930)	2.08841e-07	5.24256e-07	5.73713e-07	2537
NA	NA	QI10761	mz601_2654_rt6_11	HILIC	FALSE	601.265	6.11	TRUE	0.833226	(0.7654555,0.9069976)	2.49539e-05	7.37636e-05	8.11426e-05	2749	0.0044707	(-0.0009137,0.0098552)	0.103622	0.176476	0.172211	2745	0.135294	(-0.0204370,0.2910254)	0.0885846	0.148505	0.154163	2539	-0.101517	(-0.1785226,-0.0245121)	0.00979676	0.0234448	0.0228432	1964	-0.228388	(-0.3001324,-0.1566435)	5.04136e-10	1.59684e-09	1.74621e-09	2537
PE(34:0)	HMDB0008925	QI6101	c34_0_pe	HILIC	TRUE	720.553	6.87	TRUE	0.825771	(0.7551781,0.9029630)	2.68471e-05	7.88811e-05	8.71012e-05	2749	-0.0134162	(-0.0186965,-0.0081359)	6.68241e-07	2.95849e-06	3.06153e-06	2745	-0.249725	(-0.4072642,-0.0921863)	0.00190223	0.00511158	0.00541281	2539	-0.0999045	(-0.1768475,-0.0229615)	0.0109589	0.0260341	0.0253061	1964	0.142835	(0.0697973,0.2158716)	0.000128723	0.000258241	0.00027716	2537
NA	NA	QI6200	mz392_2785_rt7	HILIC	FALSE	392.279	7	TRUE	0.827846	(0.7577083,0.9044759)	2.88012e-05	8.4368e-05	9.32301e-05	2749	0.0156428	(0.0104145,0.0208711)	4.98023e-09	2.8202e-08	2.96334e-08	2745	0.0660474	(-0.0766966,0.2087914)	0.364332	0.466	0.47669	2539	0.168788	(0.0983111,0.2392652)	2.82493e-06	1.1323e-05	1.15084e-05	1964	0.103097	(0.0368924,0.1693010)	0.00228454	0.00398414	0.0042326	2537
NA	NA	QI15603	mz561_4127_rt1_82	HILIC	FALSE	561.413	1.82	TRUE	0.836177	(0.7688681,0.9093793)	2.93437e-05	8.58281e-05	9.47722e-05	2749	0.0020233	(-0.0032392,0.0072858)	0.450987	0.578356	0.572821	2745	-0.0499938	(-0.1972784,0.0972908)	0.505726	0.601952	0.613927	2539	0.0998741	(0.0308658,0.1688823)	0.00458126	0.0118359	0.0116069	1964	-0.106522	(-0.1748223,-0.0382217)	0.00224966	0.00393197	0.0041805	2537
NA	HMDB0012252	QI14667	linoleoyl_ethanolamide	HILIC	TRUE	324.289	2.1	TRUE	0.82853	(0.7583662,0.9051844)	3.09356e-05	9.02134e-05	9.96891e-05	2749	0.0048916	(-0.0004077,0.0101910)	0.0704101	0.126999	0.124039	2745	-0.22103	(-0.3746274,-0.0674325)	0.00481305	0.0116107	0.0123912	2539	-0.0640177	(-0.1377956,0.0097601)	0.0889645	0.164893	0.160472	1964	-0.111385	(-0.1828071,-0.0399639)	0.00225059	0.00393197	0.0041805	2537
LPC(P-18:0)/LPC(O-18:1)	HMDB0013122	QI6754	c18_1_lpc_plasmalogen	HILIC	TRUE	508.376	8	TRUE	0.829919	(0.7601883,0.9060466)	3.13539e-05	9.12966e-05	0.000100811	2749	-9.54e-05	(-0.0054790,0.0052882)	0.97228	0.983746	0.984121	2745	-0.427689	(-0.5877857,-0.2675920)	1.75278e-07	1.0771e-06	1.20263e-06	2539	-0.170911	(-0.2497513,-0.0920714)	2.22337e-05	8.06541e-05	8.15425e-05	1964	-0.171105	(-0.2455000,-0.0967104)	6.77818e-06	1.53534e-05	1.66437e-05	2537
NA	NA	QI238	mz591_498_rt1_68	HILIC	FALSE	591.498	1.68	TRUE	1.2148	(1.1082923,1.3315449)	3.23615e-05	9.40899e-05	0.000103817	2749	0.0090945	(0.0037385,0.0144505)	0.000881506	0.00254774	0.00253323	2745	0.354657	(0.1966412,0.5126735)	1.12153e-05	4.92059e-05	5.18798e-05	2539	0.245141	(0.1665251,0.3237573)	1.15992e-09	7.15039e-09	7.52636e-09	1964	0.67452	(0.6056679,0.7433724)	6.92019e-77	2.10633e-75	2.42038e-75	2537
NA	NA	QI6404	mz723_5399_rt7_44	HILIC	FALSE	723.54	7.44	TRUE	0.813032	(0.7372275,0.8966317)	3.39923e-05	9.85372e-05	0.000108806	2749	0.0274459	(0.0227217,0.0321701)	2.08801e-29	9.24419e-28	9.35689e-28	2745	-0.041921	(-0.1854469,0.1016049)	0.566872	0.660447	0.672926	2539	0.0402751	(-0.0294334,0.1099835)	0.257312	0.381464	0.378835	1964	0.0553881	(-0.0111762,0.1219524)	0.102875	0.139458	0.14563	2537
NA	NA	QI1001	mz592_5662_rt1_94	HILIC	FALSE	592.566	1.94	TRUE	0.83367	(0.7648856,0.9086401)	3.46416e-05	0.00010027	0.000110637	2749	-0.0052541	(-0.0105287,0.0000205)	0.0508979	0.0957038	0.093454	2745	0.0819693	(-0.0718434,0.2357821)	0.296124	0.395644	0.404806	2539	0.0441805	(-0.0292921,0.1176531)	0.238425	0.361745	0.356913	1964	0.371871	(0.3018652,0.4418770)	6.60484e-25	5.08547e-24	5.67146e-24	2537
N-Acetylputrescine	HMDB0002064	QI6864	n_acetylputrescine	HILIC	TRUE	131.118	8.15	TRUE	1.20335	(1.1023455,1.3136016)	3.49668e-05	0.000100912	0.00011118	2749	-0.0020116	(-0.0072514,0.0032281)	0.451637	0.578672	0.573139	2745	-0.0166804	(-0.1709594,0.1375986)	0.832117	0.874778	0.879982	2539	-0.0319925	(-0.1061389,0.0421539)	0.397543	0.530057	0.531292	1964	0.281317	(0.2104351,0.3521989)	1.02799e-14	4.72859e-14	5.07183e-14	2537
SM(d18:1/18:1)	HMDB0012101	TF7	c18_1_sm	HILIC	TRUE	729.59	7.31	TRUE	0.818468	(0.7443945,0.8999123)	3.49084e-05	0.000100893	0.00011118	2749	0.018488	(0.0135580,0.0234180)	2.54007e-13	2.32303e-12	2.54718e-12	2745	-0.0943381	(-0.2422139,0.0535377)	0.211062	0.300767	0.306649	2539	0.0349404	(-0.0367085,0.1065893)	0.338993	0.470461	0.471042	1964	-0.0878728	(-0.1564593,-0.0192863)	0.0120564	0.0191097	0.0202921	2537
NA	NA	QI6362	mz739_0641_rt7_36	HILIC	FALSE	739.064	7.36	TRUE	0.826203	(0.7547632,0.9044038)	3.50969e-05	0.000101137	0.000111347	2749	0.0121792	(0.0070322,0.0173262)	3.65062e-06	1.46025e-05	1.48721e-05	2745	-0.0347888	(-0.1882910,0.1187133)	0.656786	0.741263	0.751654	2539	0.0051202	(-0.0688341,0.0790745)	0.892008	0.928718	0.928932	1964	-0.0257951	(-0.0971075,0.0455173)	0.478206	0.548949	0.559794	2537
NA	NA	QI3557	mz605_0627_rt4_5	HILIC	FALSE	605.063	4.5	TRUE	0.832794	(0.7635901,0.9082709)	3.57166e-05	0.000102771	0.000113063	2749	-0.01597	(-0.0212517,-0.0106883)	3.43362e-09	1.98478e-08	2.09524e-08	2745	-0.30477	(-0.4636812,-0.1458589)	0.000173244	0.00059943	0.000624201	2539	-0.20569	(-0.2816172,-0.1297623)	1.20181e-07	5.73805e-07	5.94274e-07	1964	-0.18698	(-0.2606472,-0.1133134)	6.88668e-07	1.65212e-06	1.8021e-06	2537
NA	NA	QI2235	mz243_1224_rt2_51	HILIC	FALSE	243.122	2.51	TRUE	1.20245	(1.1014438,1.3127240)	3.81671e-05	0.000109499	0.000120554	2749	-0.0025296	(-0.0078408,0.0027815)	0.350429	0.481376	0.474822	2745	-0.0312482	(-0.1832824,0.1207860)	0.686959	0.76294	0.773841	2539	-0.0796559	(-0.1478288,-0.0114831)	0.0220392	0.0489537	0.0473117	1964	-0.109934	(-0.1804818,-0.0393859)	0.0022692	0.00396093	0.00420962	2537
NA	NA	QI8979	mz192_0617_rt8_79	HILIC	FALSE	192.062	8.79	TRUE	0.833437	(0.7641470,0.9090088)	3.88532e-05	0.000111303	0.000122452	2749	-0.0044847	(-0.0098651,0.0008957)	0.102292	0.174641	0.170566	2745	-0.279599	(-0.4405630,-0.1186344)	0.000669177	0.00202554	0.00213865	2539	-0.0302554	(-0.1078363,0.0473256)	0.444466	0.573829	0.575816	1964	0.0363967	(-0.0385943,0.1113877)	0.34133	0.414533	0.426737	2537
N-6-Trimethyllysine	HMDB0001325	QI8449	n6_n6_n6_trimethyllysine	HILIC	TRUE	189.16	11.47	TRUE	1.21547	(1.1075465,1.3339140)	3.90468e-05	0.000111693	0.000122792	2749	0.0126474	(0.0075112,0.0177837)	1.45271e-06	6.15191e-06	6.31269e-06	2745	0.0883136	(-0.0632336,0.2398608)	0.253268	0.348176	0.356765	2539	0.186129	(0.1120917,0.2601668)	8.89889e-07	3.86081e-06	3.97539e-06	1964	0.107199	(0.0369026,0.1774950)	0.00281394	0.00485953	0.00517332	2537
NA	NA	QI12971	mz169_097_rt3_94	HILIC	FALSE	169.097	3.94	TRUE	1.19937	(1.0996223,1.3081614)	4.06692e-05	0.000116164	0.000127614	2749	0.0077385	(0.0025276,0.0129494)	0.00362088	0.00929311	0.00909342	2745	0.157678	(0.0045767,0.3107794)	0.0435385	0.0810057	0.0848291	2539	0.0562898	(-0.0178721,0.1304517)	0.136765	0.236186	0.231548	1964	0.200415	(0.1297334,0.2710972)	2.97947e-08	8.02767e-08	8.97597e-08	2537
LPE(16:1)	NA	QI5920	mz452_277_rt6_5	HILIC	FALSE	452.277	6.5	TRUE	1.20604	(1.1027227,1.3190353)	4.13351e-05	0.00011772	0.00012942	2749	0.0076995	(0.0023484,0.0130506)	0.00481665	0.0119374	0.0116281	2745	0.374653	(0.2134859,0.5358195)	5.40014e-06	2.55948e-05	2.68882e-05	2539	0.151745	(0.0719252,0.2315653)	0.000198189	0.000636033	0.000635801	1964	0.679329	(0.6090079,0.7496497)	6.03021e-75	1.72748e-73	1.92163e-73	2537
NA	NA	QI4690	mz145_0971_rt5_62	HILIC	FALSE	145.097	5.62	TRUE	1.20572	(1.1024585,1.3186479)	4.21645e-05	0.000119732	0.00013173	2749	0.0023003	(-0.0028867,0.0074874)	0.384608	0.519568	0.513012	2745	-0.0433025	(-0.1923352,0.1057302)	0.568896	0.662408	0.67477	2539	-0.114328	(-0.1838449,-0.0448103)	0.00127899	0.00366933	0.00363903	1964	0.0948296	(0.0255390,0.1641202)	0.00732982	0.0119485	0.0127097	2537
NA	NA	QI10241	mz100_0507_rt6_54	HILIC	FALSE	100.051	6.54	TRUE	1.19767	(1.0985319,1.3057622)	4.28398e-05	0.000121473	0.000133548	2749	0.0110511	(0.0060409,0.0160613)	1.57966e-05	5.86129e-05	5.86848e-05	2745	0.0012655	(-0.1402227,0.1427538)	0.986008	0.993584	0.99363	2539	0.170402	(0.1092969,0.2315068)	5.10307e-08	2.5955e-07	2.70832e-07	1964	0.264284	(0.1993874,0.3291812)	2.10268e-15	1.01891e-14	1.09645e-14	2537
NA	NA	QI450	mz265_2522_rt1_78	HILIC	FALSE	265.252	1.78	TRUE	0.832438	(0.7621809,0.9091716)	4.57074e-05	0.000129228	0.000142179	2749	-0.0041968	(-0.0095379,0.0011443)	0.123499	0.204398	0.20011	2745	-0.145473	(-0.2996144,0.0086681)	0.0643392	0.113014	0.11794	2539	-0.0112491	(-0.0861697,0.0636716)	0.768435	0.84333	0.845691	1964	0.0088088	(-0.0628437,0.0804613)	0.809521	0.844642	0.852315	2537
Pantothenic acid	NA	NA	pantothenic_acid	AMIDE	TRUE	NA	NA	TRUE	1.20114	(1.0998068,1.3118153)	4.59165e-05	0.000129631	0.00014252	2749	0.008831	(0.0036583,0.0140037)	0.000826197	0.00239856	0.00238384	2745	0.236029	(0.0833544,0.3887042)	0.00245826	0.0064712	0.00684494	2539	0.087438	(0.0124722,0.1624038)	0.0222752	0.0493653	0.0476756	1964	0.200074	(0.1294785,0.2706706)	3.0254e-08	8.14016e-08	9.09523e-08	2537
NA	NA	QI648	mz195_138_rt1_83	HILIC	FALSE	195.138	1.83	TRUE	0.831711	(0.7609490,0.9090522)	4.87038e-05	0.000137301	0.000150845	2749	-0.0022096	(-0.0073634,0.0029441)	0.400596	0.533954	0.526966	2745	-0.166356	(-0.3188432,-0.0138681)	0.0325119	0.0632699	0.0665079	2539	0.0400149	(-0.0328986,0.1129284)	0.281929	0.409543	0.408783	1964	-0.226248	(-0.2966116,-0.1558840)	3.38738e-10	1.09249e-09	1.19643e-09	2537
NA	NA	QI11226	mz579_2928_rt5_81	HILIC	FALSE	579.293	5.81	TRUE	1.21136	(1.1039175,1.3292541)	5.2031e-05	0.000146207	0.000160633	2749	0.0151167	(0.0097962,0.0204371)	2.77636e-08	1.45841e-07	1.53194e-07	2745	0.624668	(0.4673210,0.7820161)	1.00954e-14	1.2526e-13	1.40551e-13	2539	0.377775	(0.3022220,0.4533287)	3.40319e-22	5.76471e-21	6.68517e-21	1964	0.30066	(0.2276546,0.3736647)	1.02704e-15	5.11681e-15	5.51601e-15	2537
Proline	HMDB0000162	QI9212	proline	HILIC	TRUE	116.071	8.32	TRUE	1.20306	(1.1000069,1.3157720)	5.20882e-05	0.000146207	0.000160633	2749	0.0174292	(0.0121912,0.0226673)	8.09451e-11	5.45609e-10	5.92221e-10	2745	0.336817	(0.1821316,0.4915024)	2.02915e-05	8.51893e-05	8.92577e-05	2539	0.37789	(0.3031026,0.4526774)	1.27569e-22	2.21879e-21	2.57653e-21	1964	0.226311	(0.1547770,0.2978443)	6.42215e-10	2.0178e-09	2.19794e-09	2537
NA	NA	QI2668	mz225_0728_rt2_99	HILIC	FALSE	225.073	2.99	TRUE	1.21712	(1.1065939,1.3386823)	5.2267e-05	0.000146498	0.000160839	2749	0.0274757	(0.0223774,0.0325740)	1.30493e-25	4.62182e-24	4.79813e-24	2745	0.230544	(0.0811960,0.3798914)	0.00249493	0.00655003	0.00692017	2539	0.380423	(0.3094645,0.4513814)	3.43139e-25	7.03616e-24	8.34002e-24	1964	0.342723	(0.2745015,0.4109448)	1.71343e-22	1.20933e-21	1.35003e-21	2537
NA	NA	QI2815	mz251_1024_rt3_25	HILIC	FALSE	251.102	3.25	TRUE	1.21645	(1.1057394,1.3382388)	5.70808e-05	0.000159303	0.000175276	2749	0.0026686	(-0.0023565,0.0076937)	0.297823	0.427846	0.424531	2745	0.242073	(0.0924739,0.3916730)	0.0015267	0.00418875	0.0044228	2539	0.221677	(0.1479185,0.2954352)	4.42205e-09	2.54857e-08	2.66438e-08	1964	0.192296	(0.1231056,0.2614873)	5.53043e-08	1.44997e-07	1.60865e-07	2537
NA	NA	QI12731	mz125_0348_rt4_36	HILIC	FALSE	125.035	4.36	TRUE	1.21136	(1.1030572,1.3303026)	6.00714e-05	0.00016717	0.000184065	2749	0.0237799	(0.0187516,0.0288081)	3.54878e-20	6.46077e-19	6.69599e-19	2745	0.0717548	(-0.0784144,0.2219240)	0.348863	0.451109	0.460813	2539	0.302572	(0.2326625,0.3724814)	4.08341e-17	4.70679e-16	5.18196e-16	1964	0.395795	(0.3277166,0.4638731)	2.14265e-29	2.01637e-28	2.27597e-28	2537
NA	NA	QI3074	mz208_0988_rt3_74	HILIC	FALSE	208.099	3.74	TRUE	1.20251	(1.0989048,1.3158847)	6.02952e-05	0.000167554	0.000184357	2749	0.0100351	(0.0047057,0.0153646)	0.000226704	0.000726348	0.00072243	2745	0.187327	(0.0280096,0.3466436)	0.0212107	0.0435389	0.046155	2539	0.0232772	(-0.0559293,0.1024837)	0.564444	0.679633	0.683693	1964	0.165277	(0.0915487,0.2390057)	1.14942e-05	2.53288e-05	2.73345e-05	2537
NA	NA	QI13343	mz416_2643_rt3_32	HILIC	FALSE	416.264	3.32	TRUE	1.2066	(1.1005843,1.3228336)	6.26807e-05	0.000173687	0.000191243	2749	0.0154328	(0.0101965,0.0206692)	8.36011e-09	4.66633e-08	4.87333e-08	2745	0.382212	(0.2277033,0.5367202)	1.3046e-06	7.11866e-06	7.73056e-06	2539	0.332873	(0.2591742,0.4065728)	1.7868e-18	2.36781e-17	2.69713e-17	1964	0.341278	(0.2704205,0.4121349)	7.82711e-21	5.06552e-20	5.58412e-20	2537
Kynurenic acid	HMDB0000715	QI11720	kynurenic_acid	HILIC	TRUE	190.05	5.41	TRUE	1.19688	(1.0960366,1.3070048)	6.28327e-05	0.000173861	0.0001913	2749	0.0214915	(0.0163026,0.0266804)	6.89214e-16	8.03945e-15	8.98484e-15	2745	0.266254	(0.1132353,0.4192722)	0.000655024	0.00199685	0.00210135	2539	0.278395	(0.2071703,0.3496197)	2.78194e-14	2.54423e-13	2.77035e-13	1964	0.112308	(0.0411776,0.1834387)	0.00198251	0.00349812	0.00372598	2537
NA	NA	QI2514	mz433_33_rt2_78	HILIC	FALSE	433.33	2.78	TRUE	0.839202	(0.7701436,0.9144539)	6.30692e-05	0.000174268	0.000191613	2749	0.0070778	(0.0017051,0.0124504)	0.00984253	0.0224774	0.0219505	2745	-0.0475013	(-0.2034574,0.1084548)	0.550392	0.644717	0.656624	2539	0.0973883	(0.0230210,0.1717556)	0.0102942	0.0245448	0.0238865	1964	0.175877	(0.1036509,0.2481031)	1.8998e-06	4.47498e-06	4.88228e-06	2537
CAR(9:0)	HMDB0013288	QI6373	c9_carnitine	HILIC	TRUE	302.232	7.38	TRUE	0.829221	(0.7564161,0.9090332)	6.49343e-05	0.000179167	0.000196862	2749	-0.0016738	(-0.0067692,0.0034216)	0.519558	0.639254	0.635464	2745	-0.350519	(-0.4999089,-0.2011297)	4.41279e-06	2.15441e-05	2.27624e-05	2539	0.0885525	(0.0165782,0.1605268)	0.0159173	0.0364358	0.0352244	1964	-0.0710002	(-0.1406882,-0.0013123)	0.0458422	0.0661976	0.0694168	2537
PC(P-38:5)/PC(O-38:6)	HMDB0011319	TF34	c38_6_pc_plasmalogen	HILIC	TRUE	792.589	6.62	TRUE	0.834786	(0.7639249,0.9122198)	6.60909e-05	0.000182101	0.000199946	2749	-0.0018363	(-0.0071749,0.0035022)	0.500071	0.624325	0.620867	2745	-0.187108	(-0.3468814,-0.0273343)	0.0217357	0.0444293	0.0470831	2539	-0.22586	(-0.3029970,-0.1487237)	1.0794e-08	5.95658e-08	6.2163e-08	1964	-0.361881	(-0.4348287,-0.2889326)	5.54703e-22	3.80711e-21	4.1891e-21	2537
2-hydroxygluatric acid	NA	NA	__hydroxyglutaric_acid	AMIDE	TRUE	NA	NA	TRUE	1.1944	(1.0944649,1.3034709)	6.7596e-05	0.000185984	0.000204069	2749	0.0062737	(0.0010025,0.0115448)	0.0196806	0.0417169	0.0406072	2745	0.232668	(0.0757907,0.3895459)	0.00366617	0.00919138	0.00980837	2539	-0.037164	(-0.1147979,0.0404699)	0.347933	0.478654	0.479285	1964	0.126235	(0.0533763,0.1990945)	0.000690682	0.00128382	0.0013718	2537
NA	NA	QI6468	mz669_4937_rt7_56	HILIC	FALSE	669.494	7.56	TRUE	0.832771	(0.7608415,0.9115017)	7.1743e-05	0.000196839	0.000216133	2749	0.009919	(0.0048749,0.0149631)	0.000117954	0.000389448	0.000385298	2745	-0.132378	(-0.2809514,0.0161955)	0.0807325	0.136516	0.14205	2539	0.134861	(0.0625111,0.2072104)	0.000263281	0.000821909	0.000817197	1964	0.111844	(0.0429109,0.1807769)	0.00148254	0.00263773	0.00280873	2537
PC(34:4)	HMDB0007883	QI6074	c34_4_pc	HILIC	TRUE	754.537	6.77	TRUE	1.20385	(1.0982551,1.3196072)	7.46825e-05	0.000203756	0.000224517	2749	0.0092754	(0.0040233,0.0145276)	0.000542601	0.0016313	0.0016178	2745	0.579455	(0.4239645,0.7349458)	3.62809e-13	3.94833e-12	4.40905e-12	2539	0.350097	(0.2746613,0.4255334)	2.12639e-19	2.95872e-18	3.38805e-18	1964	0.718172	(0.6507603,0.7855829)	1.52682e-89	5.31115e-88	6.08183e-88	2537
NA	NA	QI6704	mz165_9876_rt7_86	HILIC	FALSE	165.988	7.86	TRUE	0.841766	(0.7727831,0.9169073)	7.8654e-05	0.000213099	0.000235469	2749	-0.0170836	(-0.0223768,-0.0117905)	2.88073e-10	1.85203e-09	1.97654e-09	2745	-0.198144	(-0.3559028,-0.0403842)	0.0138493	0.0298434	0.031624	2539	-0.308205	(-0.3850352,-0.2313751)	5.94084e-15	5.81546e-14	6.35759e-14	1964	-0.560575	(-0.6306446,-0.4905054)	5.29732e-53	1.04234e-51	1.11711e-51	2537
NA	NA	QI1841	mz141_0406_rt2_16	HILIC	FALSE	141.041	2.16	TRUE	1.20672	(1.0992582,1.3246884)	7.86076e-05	0.000213099	0.000235469	2749	0.0347856	(0.0298101,0.0397611)	2.02553e-41	2.32102e-39	2.42051e-39	2745	0.255834	(0.1042643,0.4074033)	0.000946703	0.00274765	0.00289813	2539	0.454061	(0.3834563,0.5246654)	4.01793e-35	1.6653e-33	2.13397e-33	1964	0.448491	(0.3801072,0.5168747)	1.03216e-36	1.28888e-35	1.42319e-35	2537
NA	NA	QI3018	mz114_0553_rt3_67	HILIC	FALSE	114.055	3.67	TRUE	1.20299	(1.0974491,1.3186761)	7.98425e-05	0.000215719	0.000238529	2749	-0.0004243	(-0.0054908,0.0046422)	0.869572	0.918117	0.916213	2745	0.321407	(0.1711663,0.4716471)	2.82352e-05	0.000115551	0.000120864	2539	0.101923	(0.0295617,0.1742843)	0.00579188	0.0146407	0.0143447	1964	0.344369	(0.2756581,0.4130790)	2.1379e-22	1.50348e-21	1.67527e-21	2537
NA	NA	QI3131	mz251_1276_rt3_8	HILIC	FALSE	251.128	3.8	TRUE	1.19435	(1.0932848,1.3047514)	8.24778e-05	0.000222222	0.00024589	2749	0.0086848	(0.0033402,0.0140294)	0.0014574	0.00403843	0.00398838	2745	0.220505	(0.0623221,0.3786886)	0.00631064	0.0147932	0.0156836	2539	0.332495	(0.2561107,0.4088803)	2.72252e-17	3.17573e-16	3.5172e-16	1964	0.196641	(0.1235654,0.2697164)	1.42724e-07	3.62485e-07	3.9741e-07	2537
Hippuric acid	NA	NA	hippuric_acid	AMIDE	TRUE	NA	NA	TRUE	1.19553	(1.0936320,1.3069196)	8.52409e-05	0.00022935	0.000253601	2749	-0.0036089	(-0.0088288,0.0016109)	0.175312	0.274524	0.269451	2745	0.0070898	(-0.1464731,0.1606527)	0.927871	0.95225	0.956993	2539	-0.0494577	(-0.1231576,0.0242421)	0.188299	0.302646	0.29738	1964	-0.112239	(-0.1834004,-0.0410774)	0.0020043	0.00353337	0.00376115	2537
Hydroxyuric acid	HMDB0030097	QI2242	mz185_0305_rt2_51	HILIC	FALSE	185.03	2.51	TRUE	1.20558	(1.0982161,1.3234453)	8.54511e-05	0.000229598	0.0002537	2749	0.0383139	(0.0334011,0.0432268)	1.01409e-50	2.82207e-48	2.42368e-48	2745	0.283387	(0.1318252,0.4349487)	0.000250997	0.000834632	0.000875741	2539	0.472132	(0.4019474,0.5423158)	3.87515e-38	1.84117e-36	2.41607e-36	1964	0.46217	(0.3939408,0.5303999)	5.69559e-39	7.29935e-38	8.16748e-38	2537
NA	NA	QI15502	mz369_3511_rt1_84	HILIC	FALSE	369.351	1.84	TRUE	0.83217	(0.7592077,0.9121433)	8.70395e-05	0.000233544	0.000257881	2749	-0.0002752	(-0.0054283,0.0048779)	0.916605	0.949759	0.947665	2745	0.0365267	(-0.1157821,0.1888355)	0.638207	0.725337	0.737461	2539	-0.0285982	(-0.1017082,0.0445118)	0.443087	0.57313	0.575531	1964	0.139343	(0.0688795,0.2098068)	0.000108124	0.000218945	0.000234924	2537
gamma_aminobutyric acid	HMDB0000112	TF17	gaba	HILIC	TRUE	104.071	7.83	TRUE	1.19726	(1.0942857,1.3099182)	8.72206e-05	0.000233708	0.000257885	2749	0.0060578	(0.0007136,0.0114020)	0.0263217	0.0536908	0.052497	2745	0.723935	(0.5682413,0.8796293)	1.52022e-19	2.69217e-18	3.07042e-18	2539	-0.0552599	(-0.1327699,0.0222501)	0.162212	0.271003	0.266451	1964	-0.132613	(-0.2058952,-0.0593300)	0.00039454	0.000756461	0.000811722	2537
Glycodeoxycholate sulfate/Glycochenodeoxycholic acid	HMDB0000631	QI12738	glycodeoxycholate_glycochenode	HILIC	TRUE	450.321	4.34	TRUE	1.19697	(1.0941198,1.3094869)	8.77167e-05	0.000234714	0.000258818	2749	-0.0013357	(-0.0067103,0.0040389)	0.626077	0.731612	0.728729	2745	0.270767	(0.1098907,0.4316444)	0.000979062	0.00281715	0.00296823	2539	0.20176	(0.1213430,0.2821778)	9.35732e-07	4.0417e-06	4.1543e-06	1964	0.120909	(0.0461008,0.1957161)	0.00154618	0.00274563	0.00292124	2537
NA	NA	QI256	mz624_5192_rt1_69	HILIC	FALSE	624.519	1.69	TRUE	1.20085	(1.0958608,1.3159069)	8.82048e-05	0.000235697	0.000259724	2749	0.0128537	(0.0074949,0.0182124)	2.68636e-06	1.09707e-05	1.11659e-05	2745	0.660477	(0.5025182,0.8184350)	3.8003e-16	5.28785e-15	6.12318e-15	2539	0.272345	(0.1971028,0.3475867)	1.75453e-12	1.38936e-11	1.48876e-11	1964	0.971268	(0.9071972,1.0353381)	8.0012e-167	5.02785e-165	5.73686e-165	2537
NA	NA	QI13076	mz486_2336_rt3_78	HILIC	FALSE	486.234	3.78	TRUE	1.20529	(1.0976524,1.3234863)	9.1501e-05	0.00024417	0.000268878	2749	0.0121368	(0.0068009,0.0174727)	8.52564e-06	3.26928e-05	3.29536e-05	2745	0.117304	(-0.0422457,0.2768533)	0.149513	0.230786	0.236385	2539	0.190037	(0.1119850,0.2680896)	1.93072e-06	7.86829e-06	8.02508e-06	1964	0.0458822	(-0.0282891,0.1200536)	0.22524	0.286589	0.296597	2537
NA	NA	QI6287	mz398_8419_rt7_14	HILIC	FALSE	398.842	7.14	TRUE	0.839271	(0.7686916,0.9163315)	9.24855e-05	0.000246459	0.000271215	2749	-0.0085625	(-0.0139303,-0.0031947)	0.00177938	0.00490273	0.00483263	2745	-0.351633	(-0.5107785,-0.1924869)	1.53092e-05	6.59786e-05	6.92536e-05	2539	-0.277156	(-0.3551279,-0.1991835)	4.28214e-12	3.31016e-11	3.52907e-11	1964	-0.289957	(-0.3632454,-0.2166681)	1.24085e-14	5.64761e-14	6.03179e-14	2537
NA	NA	QI10889	mz356_2614_rt6_04	HILIC	FALSE	356.261	6.04	TRUE	1.20082	(1.0954521,1.3163324)	9.40133e-05	0.000250188	0.000275133	2749	0.0077327	(0.0024121,0.0130533)	0.00440794	0.0110368	0.0107683	2745	0.262935	(0.1077842,0.4180868)	0.000902738	0.00264044	0.00278993	2539	-0.0352655	(-0.1105900,0.0400591)	0.358635	0.487864	0.49026	1964	-0.161617	(-0.2334838,-0.0897502)	1.07809e-05	2.39194e-05	2.58958e-05	2537
Pseudouridine	HMDB0000767	QI12752	pseudouridine	HILIC	TRUE	245.077	4.32	TRUE	1.18997	(1.0904614,1.2985499)	9.47301e-05	0.000251632	0.000276348	2749	0.0177628	(0.0128265,0.0226991)	2.16427e-12	1.76402e-11	1.96428e-11	2745	-0.0304731	(-0.1725746,0.1116284)	0.67415	0.753007	0.764819	2539	0.183306	(0.1210922,0.2455195)	8.75358e-09	4.88595e-08	5.1027e-08	1964	0.319233	(0.2543067,0.3841592)	1.25083e-21	8.34458e-21	9.19841e-21	2537
LPC(20:0)	NA	QI6578	mz552_4029_rt7_72	HILIC	FALSE	552.403	7.72	TRUE	0.843063	(0.7738098,0.9185148)	9.4814e-05	0.000251632	0.000276348	2749	-0.026107	(-0.0313407,-0.0208733)	3.12143e-22	7.23874e-21	7.58666e-21	2745	-0.436725	(-0.5966775,-0.2767722)	9.37981e-08	5.8752e-07	6.56129e-07	2539	-0.349273	(-0.4273982,-0.2711479)	3.87305e-18	4.96362e-17	5.61005e-17	1964	-0.121788	(-0.1963936,-0.0471828)	0.0013863	0.00248895	0.00265414	2537
AICA-riboside	HMDB0062179	QI4130	mz259_1036_rt5_07	HILIC	FALSE	259.104	5.07	TRUE	1.19934	(1.0945130,1.3142159)	9.81335e-05	0.000260087	0.000285443	2749	0.0076086	(0.0022256,0.0129915)	0.00561663	0.0135579	0.0131821	2745	0.233048	(0.0731564,0.3929391)	0.00429682	0.0105818	0.0113474	2539	0.214465	(0.1361015,0.2928285)	8.93826e-08	4.34208e-07	4.49736e-07	1964	0.148392	(0.0743155,0.2224681)	8.78964e-05	0.000179103	0.000192139	2537
Xanthurenic_acid	NA	NA	xanthurenic_acid	AMIDE	TRUE	NA	NA	TRUE	1.20521	(1.0970887,1.3239912)	9.93866e-05	0.00026305	0.000288503	2749	0.0056931	(0.0006666,0.0107196)	0.0264409	0.0538212	0.0526615	2745	0.343371	(0.1973834,0.4893583)	4.18332e-06	2.0683e-05	2.18141e-05	2539	0.213111	(0.1426773,0.2835455)	3.48941e-09	2.04075e-08	2.13838e-08	1964	0.238657	(0.1711955,0.3061188)	5.06587e-12	1.86547e-11	2.03486e-11	2537
NA	NA	QI6298	mz134_1085_rt7_19	HILIC	FALSE	134.108	7.19	TRUE	1.20813	(1.0980751,1.3292244)	0.000104578	0.000276041	0.000302959	2749	0.0130166	(0.0080149,0.0180183)	3.5735e-07	1.63792e-06	1.70246e-06	2745	0.691195	(0.5479569,0.8344334)	6.63706e-21	1.25524e-19	1.46424e-19	2539	0.310273	(0.2399243,0.3806224)	1.05552e-17	1.2851e-16	1.4554e-16	1964	0.350613	(0.2843298,0.4168960)	1.0269e-24	7.84471e-24	8.71346e-24	2537
PE(P-35:2)_PE(O-35:3)	NA	QI11485	mz714_5421_rt5_62	HILIC	FALSE	714.542	5.62	TRUE	0.842694	(0.7727583,0.9189595)	0.000108006	0.000284703	0.000312259	2749	-0.0078821	(-0.0132176,-0.0025466)	0.00380066	0.00967802	0.00946206	2745	-0.305316	(-0.4641939,-0.1464378)	0.000168137	0.000583834	0.00060886	2539	-0.148491	(-0.2269988,-0.0699828)	0.000213549	0.00068084	0.000679001	1964	-0.52008	(-0.5912499,-0.4489094)	7.74835e-45	1.2372e-43	1.32275e-43	2537
Malonic_acid	NA	NA	malonic_acid	AMIDE	TRUE	NA	NA	TRUE	1.38938	(1.1762283,1.6411699)	0.000108797	0.000286401	0.000313913	902	0.0046505	(-0.0048622,0.0141632)	0.337583	0.46974	0.463709	901	-0.0132885	(-0.3030528,0.2764758)	0.928297	0.95225	0.956993	833	-0.0062507	(-0.1364666,0.1239653)	0.924932	0.949798	0.949429	648	0.22303	(0.0942074,0.3518535)	0.000710646	0.00131842	0.00140755	831
N-Acetylaspartic acid	NA	NA	n_acetyl_l_aspartic_acid	AMIDE	TRUE	NA	NA	TRUE	0.835011	(0.7619577,0.9150674)	0.000113353	0.000297991	0.000326402	2349	-0.0066682	(-0.0123138,-0.0010226)	0.0206337	0.0435506	0.0423907	2345	-0.237417	(-0.4021167,-0.0727181)	0.00474313	0.0114921	0.0122663	2172	-0.0383785	(-0.1176151,0.0408581)	0.34225	0.473175	0.473732	1696	-0.226002	(-0.3021915,-0.1498129)	6.87487e-09	1.97526e-08	2.18593e-08	2172
NA	NA	QI15854	mz566_4769_rt1_74	HILIC	FALSE	566.477	1.74	TRUE	0.844319	(0.7743862,0.9205680)	0.000124979	0.000326791	0.000359158	2749	-0.011576	(-0.0167491,-0.0064029)	1.18833e-05	4.51241e-05	4.53209e-05	2745	-0.319826	(-0.4700967,-0.1695558)	3.10124e-05	0.000125077	0.000131185	2539	-0.0778629	(-0.1487352,-0.0069906)	0.0313131	0.0665916	0.0639644	1964	-0.343668	(-0.4123681,-0.2749680)	2.55156e-22	1.78152e-21	1.9778e-21	2537
NA	NA	QI3179	mz302_1234_rt3_86	HILIC	FALSE	302.123	3.86	TRUE	1.20699	(1.0958527,1.3294094)	0.000135031	0.000351658	0.000387269	2749	-0.0090418	(-0.0142256,-0.0038581)	0.000634893	0.00187959	0.00185803	2745	-0.0296963	(-0.1846422,0.1252496)	0.707084	0.776437	0.786624	2539	-0.0367274	(-0.1129045,0.0394497)	0.344498	0.475271	0.475925	1964	-0.0784509	(-0.1503645,-0.0065373)	0.0325183	0.0484664	0.0511307	2537
Ile-Pro-Lys	NA	QI8422	mz357_2492_rt11_73	HILIC	FALSE	357.249	11.73	TRUE	1.19341	(1.0896649,1.3070340)	0.000138653	0.000360609	0.000396863	2749	0.0153108	(0.0102750,0.0203465)	2.81569e-09	1.6373e-08	1.73292e-08	2745	-0.0036694	(-0.1518548,0.1445159)	0.961276	0.975295	0.977638	2539	0.255978	(0.1873442,0.3246124)	3.75036e-13	3.08257e-12	3.34038e-12	1964	0.294956	(0.2269961,0.3629165)	2.91798e-17	1.62406e-16	1.75079e-16	2537
NA	NA	QI350	mz551_4673_rt1_75	HILIC	FALSE	551.467	1.75	TRUE	0.83908	(0.7666025,0.9184097)	0.000140921	0.000366019	0.000402484	2749	-0.0021536	(-0.0071486,0.0028414)	0.397962	0.532438	0.52597	2745	-0.273397	(-0.4183859,-0.1284077)	0.000222315	0.000749255	0.000783292	2539	-0.0423232	(-0.1112652,0.0266187)	0.228751	0.351425	0.345657	1964	-0.241253	(-0.3081986,-0.1743069)	2.04571e-12	7.73795e-12	8.42974e-12	2537
NA	NA	QI676	mz269_2109_rt1_84	HILIC	FALSE	269.211	1.84	TRUE	0.833896	(0.7594307,0.9156629)	0.000141178	0.000366198	0.000402484	2749	-0.0049975	(-0.0099769,-0.0000181)	0.0491717	0.093087	0.0909835	2745	-0.197313	(-0.3443888,-0.0502373)	0.00857268	0.0194634	0.0206609	2539	-0.0278597	(-0.0986995,0.0429800)	0.440629	0.570708	0.573377	1964	-0.225969	(-0.2938106,-0.1581275)	7.84534e-11	2.6625e-10	2.93739e-10	2537
N-Acetylalanine	NA	NA	n_acetyl_l_alanine	AMIDE	TRUE	NA	NA	TRUE	1.19967	(1.0922221,1.3176933)	0.00014322	0.000370508	0.000406688	2349	0.0227134	(0.0173252,0.0281015)	2.28462e-16	2.78152e-15	3.06182e-15	2345	0.127693	(-0.0313964,0.2867820)	0.115624	0.186299	0.192224	2172	0.167663	(0.0950263,0.2402989)	6.3909e-06	2.47504e-05	2.51009e-05	1696	0.198757	(0.1252092,0.2723040)	1.27807e-07	3.25874e-07	3.57959e-07	2172
NA	NA	QI3403	mz147_0763_rt4_24	HILIC	FALSE	147.076	4.24	TRUE	1.18861	(1.0873426,1.2993148)	0.000142966	0.000370343	0.000406688	2749	0.0017435	(-0.0033503,0.0068373)	0.50219	0.625717	0.622108	2745	-0.13515	(-0.2810683,0.0107693)	0.069461	0.120597	0.125926	2539	-0.0148264	(-0.0846828,0.0550299)	0.677277	0.773804	0.773877	1964	0.0495541	(-0.0182223,0.1173304)	0.151783	0.198973	0.206702	2537
NA	NA	QI5745	mz150_0582_rt6_32	HILIC	FALSE	150.058	6.32	TRUE	1.19435	(1.0897086,1.3090358)	0.000146827	0.000378833	0.000416107	2749	0.0036966	(-0.0013460,0.0087393)	0.150709	0.241631	0.237752	2745	-0.0487669	(-0.1969236,0.0993899)	0.518697	0.613066	0.624327	2539	-0.009312	(-0.0794310,0.0608069)	0.794544	0.862749	0.863164	1964	0.147978	(0.0793579,0.2165986)	2.43451e-05	5.22294e-05	5.63079e-05	2537
N1 acetylspermidine	HMDB0001276	QI7565	n1_acetylspermidine	HILIC	TRUE	188.176	10.09	TRUE	0.836265	(0.7623796,0.9173121)	0.000151447	0.000389721	0.000428353	2749	-0.0015669	(-0.0067148,0.0035810)	0.550674	0.66463	0.661917	2745	-0.390227	(-0.5414941,-0.2389597)	4.52635e-07	2.60868e-06	2.88479e-06	2539	-0.115808	(-0.1877359,-0.0438803)	0.0016149	0.00453943	0.00449663	1964	-0.156212	(-0.2267121,-0.0857119)	1.44828e-05	3.15929e-05	3.39907e-05	2537
LPC(P-16:0)/LPC(O-16:1)	HMDB0010407	QI9559	c16_1_lpc_plasmalogen	HILIC	TRUE	480.345	7.76	TRUE	0.845104	(0.7740754,0.9226509)	0.000171787	0.000441479	0.000484926	2749	0.0069157	(0.0015540,0.0122774)	0.0114896	0.0257854	0.0251543	2745	-0.454099	(-0.6129006,-0.2952975)	2.27803e-08	1.5355e-07	1.71031e-07	2539	-0.158972	(-0.2371449,-0.0807987)	6.90151e-05	0.000236693	0.000237333	1964	-0.153475	(-0.2273616,-0.0795891)	4.78054e-05	9.93863e-05	0.000106947	2537
NA	NA	QI13701	mz114_0917_rt2_75	HILIC	FALSE	114.092	2.75	TRUE	0.845448	(0.7743110,0.9231205)	0.000181246	0.000464562	0.000510622	2749	-0.0030239	(-0.0083828,0.0023350)	0.268631	0.392863	0.389108	2745	-0.33699	(-0.4956179,-0.1783627)	3.20705e-05	0.000128811	0.000134865	2539	-0.0187777	(-0.0969902,0.0594348)	0.6378	0.739498	0.740207	1964	-0.0185875	(-0.0926184,0.0554434)	0.622523	0.682812	0.690408	2537
NA	NA	QI3107	mz448_3055_rt3_77	HILIC	FALSE	448.305	3.77	TRUE	1.19427	(1.0880906,1.3108022)	0.000186121	0.000476431	0.000523143	2749	-0.0086665	(-0.0140189,-0.0033141)	0.00151532	0.00419296	0.00413899	2745	0.115027	(-0.0443121,0.2743669)	0.157022	0.238409	0.24369	2539	0.0168499	(-0.0610522,0.0947519)	0.671471	0.768588	0.768532	1964	-0.112442	(-0.1862854,-0.0385983)	0.00285482	0.00492577	0.00524176	2537
DHA	NA	NA	dha	AMIDE	TRUE	NA	NA	TRUE	0.792014	(0.7008369,0.8950527)	0.00018642	0.00047657	0.000523143	1702	-0.0050007	(-0.0113738,0.0013723)	0.123987	0.204776	0.200534	1697	0.05063	(-0.1631324,0.2643925)	0.642299	0.727858	0.739041	1592	0.0794969	(-0.0133015,0.1722952)	0.0930817	0.17187	0.167477	1290	0.0440801	(-0.0474232,0.1355834)	0.344854	0.418031	0.430018	1590
NA	NA	QI12849	mz607_06_rt4_17	HILIC	FALSE	607.06	4.17	TRUE	0.850119	(0.7804508,0.9260054)	0.000197548	0.000503696	0.000553289	2749	-0.0090694	(-0.0143424,-0.0037963)	0.000755228	0.00220567	0.0021923	2745	-0.0122583	(-0.1680218,0.1435051)	0.87737	0.912099	0.916434	2539	-0.0927244	(-0.1661749,-0.0192740)	0.0133776	0.0310603	0.0301154	1964	-0.0986087	(-0.1707825,-0.0264348)	0.0074295	0.0121009	0.012867	2537
NA	NA	QI9907	mz398_3402_rt7_14	HILIC	FALSE	398.34	7.14	TRUE	0.846769	(0.7757272,0.9243175)	0.000199032	0.000506462	0.000555614	2749	-0.009462	(-0.0148096,-0.0041144)	0.000529511	0.00160418	0.00159521	2745	-0.295845	(-0.4537741,-0.1379153)	0.000244396	0.00081661	0.00085688	2539	-0.278528	(-0.3549144,-0.2021413)	1.21106e-12	9.66863e-12	1.03992e-11	1964	-0.288607	(-0.3612583,-0.2159560)	9.72098e-15	4.48731e-14	4.82349e-14	2537
NA	NA	QI15609	mz277_2159_rt1_82	HILIC	FALSE	277.216	1.82	TRUE	0.846043	(0.7747091,0.9239458)	0.000199153	0.000506462	0.000555614	2749	0.001919	(-0.0033967,0.0072347)	0.479094	0.605237	0.602122	2745	-0.180102	(-0.3376915,-0.0225121)	0.0251111	0.0501707	0.0530329	2539	0.0075106	(-0.0687622,0.0837834)	0.846886	0.896366	0.895762	1964	-0.269153	(-0.3416121,-0.1966932)	4.31221e-13	1.70735e-12	1.85697e-12	2537
NA	NA	QI4077	mz235_0925_rt4_99	HILIC	FALSE	235.093	4.99	TRUE	1.19155	(1.0863872,1.3068949)	0.000201162	0.000510239	0.000559043	2749	0.0074472	(0.0021180,0.0127765)	0.00618173	0.0148441	0.0144276	2745	0.51824	(0.3597370,0.6767436)	1.71474e-10	1.52526e-09	1.67275e-09	2539	0.240905	(0.1629667,0.3188437)	1.60928e-09	9.8272e-09	1.03485e-08	1964	0.408746	(0.3363242,0.4811671)	7.77361e-28	6.88318e-27	7.63518e-27	2537
CAR(DC3:0(2Me))	HMDB0013133	QI7192	c3_dc_ch3_carnitine	HILIC	TRUE	262.128	8.74	TRUE	1.18962	(1.0855548,1.3036513)	0.000201093	0.000510239	0.000559043	2749	0.0171691	(0.0122226,0.0221156)	1.22879e-11	9.1712e-11	1.01855e-10	2745	0.0536925	(-0.0917408,0.1991258)	0.469167	0.568723	0.581491	2539	0.226515	(0.1598652,0.2931646)	3.42446e-11	2.42576e-10	2.58457e-10	1964	0.272548	(0.2057968,0.3392987)	1.7814e-15	8.69716e-15	9.35724e-15	2537
NA	NA	QI10958	mz358_2771_rt6_01	HILIC	FALSE	358.277	6.01	TRUE	1.19141	(1.0862641,1.3067415)	0.000203052	0.000514363	0.000563204	2749	0.0072712	(0.0020194,0.0125230)	0.00667335	0.0159115	0.0154848	2745	0.232346	(0.0782536,0.3864386)	0.00313807	0.00800126	0.00855512	2539	-0.0481754	(-0.1230174,0.0266665)	0.206955	0.327497	0.321855	1964	-0.0757325	(-0.1473308,-0.0041342)	0.0381684	0.0561571	0.0591074	2537
Taurine	HMDB0000251	QI5609	taurine	HILIC	TRUE	126.022	6.23	TRUE	0.843424	(0.7709047,0.9227645)	0.000205373	0.000519567	0.000568542	2749	-0.0037689	(-0.0090051,0.0014672)	0.158243	0.251639	0.24746	2745	-0.342414	(-0.4981260,-0.1867011)	1.67938e-05	7.17419e-05	7.52572e-05	2539	0.0546843	(-0.0203919,0.1297606)	0.15331	0.259243	0.254158	1964	-0.0505945	(-0.1231703,0.0219812)	0.171747	0.223042	0.231689	2537
NA	NA	QI15404	mz421_3304_rt1_86	HILIC	FALSE	421.33	1.86	TRUE	0.850262	(0.7803187,0.9264741)	0.000212523	0.000535569	0.000587202	2749	-0.0039306	(-0.0091802,0.0013190)	0.142177	0.229843	0.225533	2745	-0.122064	(-0.2742186,0.0300900)	0.115817	0.186302	0.192224	2539	0.0616173	(-0.0093578,0.1325924)	0.0888011	0.164883	0.160472	1964	-0.195851	(-0.2661288,-0.1255725)	5.09171e-08	1.34217e-07	1.49315e-07	2537
NA	NA	QI7549	mz178_0862_rt10_02	HILIC	FALSE	178.086	10.02	TRUE	1.18337	(1.0823230,1.2938523)	0.000218074	0.000548848	0.000601381	2749	0.0122185	(0.0069292,0.0175077)	6.16122e-06	2.40522e-05	2.44066e-05	2745	0.0813068	(-0.0758120,0.2384255)	0.310327	0.411236	0.420613	2539	0.0834873	(0.0079431,0.1590314)	0.0303256	0.0651445	0.0626526	1964	0.124171	(0.0514354,0.1969059)	0.000827149	0.00152295	0.00162707	2537
NA	NA	QI12605	mz607_0598_rt4_54	HILIC	FALSE	607.06	4.54	TRUE	0.849158	(0.7784975,0.9262325)	0.000225403	0.000566561	0.000620399	2749	-0.0136959	(-0.0190011,-0.0083907)	4.42264e-07	2.00356e-06	2.07937e-06	2745	-0.29417	(-0.4526310,-0.1357096)	0.000277809	0.000911064	0.00095764	2539	-0.173922	(-0.2497769,-0.0980665)	7.30869e-06	2.79163e-05	2.83261e-05	1964	-0.167736	(-0.2412499,-0.0942229)	8.00845e-06	1.79316e-05	1.93661e-05	2537
NA	NA	QI15232	mz334_2949_rt1_93	HILIC	FALSE	334.295	1.93	TRUE	0.85376	(0.7843913,0.9292637)	0.000255447	0.000640426	0.000701745	2749	-0.0047354	(-0.0100851,0.0006144)	0.0827414	0.146527	0.143472	2745	-0.0851404	(-0.2422947,0.0720139)	0.288181	0.386091	0.395456	2539	-0.0379448	(-0.1113228,0.0354332)	0.310636	0.441047	0.440605	1964	-0.133124	(-0.2059304,-0.0603179)	0.000342858	0.00066193	0.000711517	2537
NA	NA	QI5780	mz86_0601_rt6_35	HILIC	FALSE	86.0601	6.35	TRUE	1.18425	(1.0815875,1.2966609)	0.000257053	0.000643624	0.000704807	2749	0.0028375	(-0.0022077,0.0078826)	0.270207	0.394575	0.390602	2745	-0.0756674	(-0.2237727,0.0724378)	0.316521	0.417174	0.425789	2539	-0.0127349	(-0.0824142,0.0569443)	0.720057	0.806596	0.810425	1964	0.158749	(0.0901914,0.2273060)	5.87217e-06	1.3426e-05	1.45939e-05	2537
(E,E)-Trichostachine	HMDB0029374	QI14497	mz272_1279_rt2_11	HILIC	FALSE	272.128	2.11	TRUE	1.18679	(1.0825281,1.3010980)	0.000262054	0.000655303	0.000717148	2749	0.0208267	(0.0155093,0.0261441)	2.19925e-14	2.18579e-13	2.44475e-13	2745	0.368943	(0.2109355,0.5269508)	4.90603e-06	2.35393e-05	2.48595e-05	2539	0.304596	(0.2264475,0.3827455)	3.27679e-14	2.95518e-13	3.19654e-13	1964	0.154346	(0.0808661,0.2278260)	3.92872e-05	8.24667e-05	8.90944e-05	2537
NA	NA	QI4009	mz159_0275_rt4_93	HILIC	FALSE	159.028	4.93	TRUE	0.851007	(0.7803287,0.9280872)	0.000265361	0.000661874	0.000724815	2749	0.0108659	(0.0055146,0.0162171)	7.02589e-05	0.000240113	0.0002354	2745	-0.363545	(-0.5195695,-0.2075204)	5.13543e-06	2.45192e-05	2.58393e-05	2539	0.0335846	(-0.0428699,0.1100391)	0.38907	0.520899	0.522893	1964	-0.0927332	(-0.1653612,-0.0201051)	0.0123518	0.019562	0.0207649	2537
NA	NA	QI9210	mz191_9823_rt8_32	HILIC	FALSE	191.982	8.32	TRUE	1.18684	(1.0824211,1.3013298)	0.000266834	0.000663848	0.000727452	2749	0.0140947	(0.0088219,0.0193675)	1.71388e-07	8.08387e-07	8.47484e-07	2745	0.381388	(0.2240373,0.5387381)	2.11782e-06	1.12106e-05	1.20038e-05	2539	0.365586	(0.2896408,0.4415318)	1.01275e-20	1.54128e-19	1.81535e-19	1964	0.27215	(0.1995111,0.3447892)	2.7255e-13	1.1038e-12	1.18795e-12	2537
NA	HMDB0000043	QI7339	mz273_1209_rt9_19	HILIC	FALSE	273.121	9.19	TRUE	0.841854	(0.7674084,0.9235216)	0.00026825	0.000666147	0.000729064	2749	-0.0029686	(-0.0080201,0.0020828)	0.249286	0.370694	0.366267	2745	-0.26839	(-0.4191236,-0.1176566)	0.000488527	0.00152264	0.00159578	2539	-0.123968	(-0.1978472,-0.0500884)	0.00101674	0.00296498	0.00295143	1964	-0.271238	(-0.3406248,-0.2018522)	2.52306e-14	1.10946e-13	1.19804e-13	2537
1-Methylguanine	HMDB0003282	QI11692	_1_methylguanine	HILIC	TRUE	166.072	5.43	TRUE	1.18185	(1.0802747,1.2929811)	0.000268442	0.000666147	0.000729064	2749	0.0229541	(0.0176639,0.0282443)	2.86788e-17	3.8796e-16	4.0319e-16	2745	0.245476	(0.0851811,0.4057715)	0.00270011	0.00702409	0.00743351	2539	0.124023	(0.0457037,0.2023423)	0.00192593	0.00530652	0.00523065	1964	0.0273042	(-0.0472499,0.1018582)	0.472733	0.543936	0.554746	2537
NA	NA	QI4658	mz734_5114_rt5_57	HILIC	FALSE	734.511	5.57	TRUE	0.853842	(0.7842612,0.9295957)	0.000269185	0.00066714	0.0007297	2749	-0.0051878	(-0.0105556,0.0001799)	0.0581835	0.107944	0.105614	2745	0.0849258	(-0.0711058,0.2409573)	0.285942	0.384148	0.393136	2539	0.0325146	(-0.0434437,0.1084730)	0.401292	0.533595	0.534807	1964	-0.0386666	(-0.1111871,0.0338540)	0.295885	0.367124	0.378838	2537
NA	NA	QI15823	mz279_2315_rt1_76	HILIC	FALSE	279.231	1.76	TRUE	0.843626	(0.7696800,0.9246773)	0.000280029	0.000693134	0.000757663	2749	-0.0039164	(-0.0089096,0.0010769)	0.12418	0.204829	0.200534	2745	-0.209179	(-0.3558740,-0.0624850)	0.0052105	0.0124694	0.0133188	2539	-0.0398217	(-0.1113832,0.0317398)	0.275261	0.401354	0.400735	1964	-0.290304	(-0.3576965,-0.2229112)	4.96888e-17	2.68127e-16	2.88477e-16	2537
NA	NA	QI12488	mz157_0495_rt4_69	HILIC	FALSE	157.049	4.69	TRUE	0.853047	(0.7828498,0.9295384)	0.000286029	0.000707087	0.00077244	2749	-0.0009163	(-0.0062924,0.0044597)	0.738237	0.815241	0.813706	2745	-0.445976	(-0.6044627,-0.2874883)	3.77918e-08	2.50403e-07	2.77915e-07	2539	0.0128349	(-0.0611906,0.0868603)	0.733865	0.816897	0.818959	1964	0.11355	(0.0395230,0.1875772)	0.00265714	0.00460508	0.00490391	2537
Betaine	HMDB0000043	QI7340	betaine	HILIC	TRUE	118.087	9.19	TRUE	0.842521	(0.7678462,0.9244574)	0.000296003	0.000730207	0.00079672	2749	-0.0038067	(-0.0088613,0.0012479)	0.139861	0.226663	0.222105	2745	-0.304067	(-0.4545053,-0.1536279)	7.5942e-05	0.000286141	0.00029748	2539	-0.197197	(-0.2703009,-0.1240935)	1.35794e-07	6.42055e-07	6.64603e-07	1964	-0.384582	(-0.4530340,-0.3161296)	1.32844e-27	1.16045e-26	1.28715e-26	2537
NA	NA	QI8793	mz132_1019_rt9_45	HILIC	FALSE	132.102	9.45	TRUE	1.17684	(1.0774961,1.2853528)	0.000296131	0.000730207	0.00079672	2749	0.0128431	(0.0075736,0.0181126)	1.85392e-06	7.71674e-06	7.88879e-06	2745	0.180492	(0.0230998,0.3378834)	0.0246175	0.049235	0.0520671	2539	0.128999	(0.0530092,0.2049882)	0.000886902	0.0026098	0.00260618	1964	0.0525211	(-0.0206220,0.1256641)	0.159241	0.208329	0.216447	2537
NA	NA	QI8492	mz246_1811_rt11_04	HILIC	FALSE	246.181	11.04	TRUE	1.20501	(1.0888216,1.3336071)	0.000312325	0.000769164	0.000838715	2749	0.0109569	(0.0056780,0.0162357)	4.83638e-05	0.000167638	0.000164736	2745	0.0536532	(-0.1045785,0.2118848)	0.506174	0.601952	0.613927	2539	0.118854	(0.0422295,0.1954793)	0.00238116	0.00650561	0.00643048	1964	0.190702	(0.1175239,0.2638805)	3.46006e-07	8.58624e-07	9.39721e-07	2537
3-Methylhistidine	HMDB0000479	QI7555	methylhistidine	HILIC	TRUE	170.092	10.05	TRUE	1.1741	(1.0759579,1.2811910)	0.00031357	0.000771256	0.000840485	2749	0.0092035	(0.0039934,0.0144137)	0.000540858	0.00163095	0.0016178	2745	-0.0184861	(-0.1693395,0.1323673)	0.810121	0.859171	0.866304	2539	0.133106	(0.0617392,0.2044735)	0.000261134	0.000816515	0.000812291	1964	0.177829	(0.1081939,0.2474636)	5.88992e-07	1.42529e-06	1.5526e-06	2537
NA	NA	QI9201	mz412_1427_rt8_33	HILIC	FALSE	412.143	8.33	TRUE	1.18859	(1.0818684,1.3058354)	0.000319004	0.000783632	0.000853455	2749	0.0151492	(0.0097897,0.0205088)	3.26702e-08	1.69259e-07	1.77459e-07	2745	0.294135	(0.1335289,0.4547401)	0.000335403	0.00107109	0.00112376	2539	0.294336	(0.2180597,0.3706131)	5.80642e-14	5.11806e-13	5.55094e-13	1964	0.191926	(0.1174930,0.2663589)	4.58268e-07	1.12431e-06	1.22833e-06	2537
LPC(P-18:0)/LPC(O-18:1)	HMDB0013122	QI6543	c18_1_lpc_plasmalogen_minor	HILIC	TRUE	508.376	7.67	TRUE	0.852785	(0.7819039,0.9300927)	0.000322122	0.000790294	0.000860192	2749	-0.0056152	(-0.0109691,-0.0002612)	0.0398299	0.0775886	0.0756504	2745	-0.363738	(-0.5229291,-0.2045475)	7.77726e-06	3.59007e-05	3.78054e-05	2539	-0.273707	(-0.3520352,-0.1953784)	9.65086e-12	7.14824e-11	7.60403e-11	1964	-0.260821	(-0.3343425,-0.1872993)	4.42804e-12	1.64615e-11	1.79373e-11	2537
NA	NA	QI3348	mz605_0628_rt4_18	HILIC	FALSE	605.063	4.18	TRUE	0.855539	(0.7857015,0.9315846)	0.000329288	0.000806859	0.000877693	2749	-0.0119063	(-0.0172230,-0.0065896)	1.1706e-05	4.45377e-05	4.47637e-05	2745	-0.0175946	(-0.1748302,0.1396409)	0.826337	0.871052	0.876455	2539	-0.113941	(-0.1890076,-0.0388751)	0.0029482	0.00789972	0.00780022	1964	-0.128764	(-0.2016061,-0.0559225)	0.00053639	0.00101151	0.00108336	2537
NA	NA	QI682	mz568_4935_rt1_84	HILIC	FALSE	568.494	1.84	TRUE	0.849797	(0.7774033,0.9289313)	0.000339991	0.000832038	0.00090454	2749	-0.0066612	(-0.0118184,-0.0015041)	0.0113742	0.025615	0.024978	2745	-0.332316	(-0.4814635,-0.1831680)	1.29793e-05	5.64368e-05	5.94643e-05	2539	-0.0447473	(-0.1157311,0.0262364)	0.216495	0.337656	0.331681	1964	-0.305843	(-0.3743017,-0.2373835)	3.49287e-18	2.03716e-17	2.21627e-17	2537
NA	NA	QI14487	mz249_1478_rt2_11	HILIC	FALSE	249.148	2.11	TRUE	0.852624	(0.7813146,0.9304425)	0.0003465	0.000846903	0.00092015	2749	-0.0123753	(-0.0177350,-0.0070156)	6.2232e-06	2.42143e-05	2.4534e-05	2745	-0.235752	(-0.3898943,-0.0816095)	0.00273427	0.00708292	0.00749702	2539	-0.101287	(-0.1747017,-0.0278727)	0.00687391	0.0171892	0.0168499	1964	-0.141599	(-0.2131183,-0.0700803)	0.000106094	0.000215058	0.000230863	2537
Deoxycholic_acid	NA	NA	deoxycholic_acid	AMIDE	TRUE	NA	NA	TRUE	1.20872	(1.0891133,1.3414630)	0.000362954	0.000884899	0.000962063	2247	-0.0032945	(-0.0091814,0.0025923)	0.272557	0.397114	0.393206	2244	0.343566	(0.1719491,0.5151837)	8.91918e-05	0.000330804	0.000343406	2073	0.10399	(0.0159484,0.1920314)	0.0206431	0.0462216	0.0445816	1584	0.0562266	(-0.0249443,0.1373976)	0.174469	0.226275	0.23514	2071
NA	NA	QI10773	mz328_2301_rt6_1	HILIC	FALSE	328.23	6.1	TRUE	1.18563	(1.0795275,1.3021582)	0.000371155	0.000902634	0.000981986	2749	0.0125025	(0.0071359,0.0178690)	5.13769e-06	2.03006e-05	2.05795e-05	2745	0.322025	(0.1706705,0.4733788)	3.12022e-05	0.000125582	0.0001316	2539	0.0391236	(-0.0345176,0.1127648)	0.297577	0.42844	0.428009	1964	-0.122564	(-0.1928496,-0.0522781)	0.000637512	0.00119067	0.00127502	2537
NA	NA	QI11533	mz788_5198_rt5_58	HILIC	FALSE	788.52	5.58	TRUE	1.19631	(1.0837949,1.3205121)	0.00037558	0.000912257	0.000991863	2749	-0.0072481	(-0.0125308,-0.0019653)	0.00718216	0.0170412	0.0165501	2745	0.229312	(0.0708185,0.3878064)	0.0045891	0.0111884	0.0119433	2539	-0.0272648	(-0.1055958,0.0510662)	0.494922	0.618018	0.620926	1964	0.637299	(0.5677351,0.7068621)	5.16017e-68	1.34027e-66	1.47994e-66	2537
NA	NA	QI13770	mz141_0405_rt2_66	HILIC	FALSE	141.041	2.66	TRUE	1.18325	(1.0783736,1.2983349)	0.000380388	0.000921637	0.00100271	2749	0.0369917	(0.0320508,0.0419325)	5.012e-47	8.13615e-45	8.98401e-45	2745	0.28394	(0.1319281,0.4359515)	0.000254653	0.000840787	0.000884195	2539	0.479166	(0.4093460,0.5489860)	1.46808e-39	8.93694e-38	1.16957e-37	1964	0.466599	(0.3981735,0.5350248)	1.87179e-39	2.41473e-38	2.71126e-38	2537
cis-Aconitic acid	NA	NA	aconitic_acid	AMIDE	TRUE	NA	NA	TRUE	1.1997	(1.0848091,1.3267490)	0.000392713	0.000949138	0.0010333	2749	0.0160429	(0.0108463,0.0212395)	1.61092e-09	9.50931e-09	1.00437e-08	2745	0.0107731	(-0.1453469,0.1668931)	0.892376	0.923671	0.927968	2539	0.0979193	(0.0195036,0.1763350)	0.014414	0.0333078	0.0322964	1964	0.118647	(0.0462542,0.1910397)	0.00132643	0.00238586	0.00254292	2537
NA	NA	QI12576	mz287_0436_rt4_59	HILIC	FALSE	287.044	4.59	TRUE	0.854392	(0.7830647,0.9322163)	0.000403068	0.000972957	0.00105861	2749	-0.004312	(-0.0096745,0.0010506)	0.114983	0.192429	0.188226	2745	-0.186592	(-0.3449091,-0.0282753)	0.0209063	0.0430047	0.0456311	2539	-0.0070061	(-0.0844871,0.0704749)	0.859262	0.90547	0.904686	1964	-0.0587924	(-0.1324216,0.0148368)	0.117528	0.156919	0.163626	2537
NA	NA	QI710	mz576_4994_rt1_84	HILIC	FALSE	576.499	1.84	TRUE	1.17874	(1.0760253,1.2912672)	0.000407598	0.000982674	0.00106855	2749	-0.0058076	(-0.0111553,-0.0004598)	0.033307	0.0662062	0.0646309	2745	0.170275	(0.0110032,0.3295472)	0.0361485	0.0691722	0.0727026	2539	-0.113115	(-0.1908467,-0.0353843)	0.00436358	0.0113488	0.0111341	1964	-0.231985	(-0.3054380,-0.1585329)	6.86132e-10	2.14885e-09	2.34265e-09	2537
NA	NA	QI11469	mz698_5114_rt5_64	HILIC	FALSE	698.511	5.64	TRUE	0.856699	(0.7862646,0.9334428)	0.000410186	0.000987691	0.00107337	2749	-0.0063804	(-0.0117230,-0.0010379)	0.0192653	0.0410151	0.0399188	2745	-0.0551794	(-0.2131644,0.1028057)	0.49348	0.592663	0.605703	2539	-0.038642	(-0.1161460,0.0388620)	0.328291	0.459749	0.460185	1964	-0.358419	(-0.4304430,-0.2863944)	4.15302e-22	2.87903e-21	3.18472e-21	2537
NA	NA	QI8618	mz174_1124_rt10_18	HILIC	FALSE	174.112	10.18	TRUE	0.851046	(0.7779648,0.9309918)	0.000430107	0.00103438	0.00112345	2749	0.0006732	(-0.0046777,0.0060241)	0.805162	0.86895	0.866168	2745	-0.171786	(-0.3306044,-0.0129680)	0.0340174	0.06574	0.0690948	2539	0.0710102	(-0.0076885,0.1497089)	0.0769531	0.145359	0.141033	1964	0.0384171	(-0.0354373,0.1122716)	0.307822	0.379517	0.391674	2537
NA	NA	QI972	mz316_1175_rt1_93	HILIC	FALSE	316.118	1.93	TRUE	0.855602	(0.7841005,0.9336226)	0.000460858	0.00110425	0.00120158	2749	-0.0268808	(-0.0320545,-0.0217070)	5.98357e-24	1.71412e-22	1.78759e-22	2745	-0.332841	(-0.4875906,-0.1780914)	2.55612e-05	0.000105271	0.000110074	2539	-0.360685	(-0.4341876,-0.2871821)	1.87864e-21	2.95128e-20	3.45381e-20	1964	-0.233648	(-0.3052270,-0.1620689)	1.83599e-10	6.06188e-10	6.68226e-10	2537
NA	NA	QI2914	mz160_0967_rt3_46	HILIC	FALSE	160.097	3.46	TRUE	1.17005	(1.0715938,1.2775561)	0.000462188	0.00110607	0.00120286	2749	0.0063678	(0.0011465,0.0115891)	0.0168517	0.0363534	0.0353812	2745	0.0936599	(-0.0618001,0.2491199)	0.237562	0.330079	0.337291	2539	0.106948	(0.0320349,0.1818601)	0.00516304	0.013199	0.0129211	1964	0.168561	(0.0966406,0.2404806)	4.52216e-06	1.03759e-05	1.12975e-05	2537
PC(36:2)	NA	QI6527	c36_2_pc	HILIC	TRUE	786.599	7.64	TRUE	0.856322	(0.7849851,0.9341420)	0.000473944	0.00113281	0.00123122	2749	-0.0148693	(-0.0201944,-0.0095441)	4.76798e-08	2.40208e-07	2.51587e-07	2745	-0.0472432	(-0.2062398,0.1117534)	0.560181	0.653979	0.666244	2539	-0.0233118	(-0.0995793,0.0529557)	0.548943	0.667921	0.671086	1964	0.274637	(0.2016688,0.3476052)	2.12861e-13	8.63861e-13	9.30618e-13	2537
NA	NA	QI8703	mz191_139_rt9_74	HILIC	FALSE	191.139	9.74	TRUE	0.857343	(0.7862845,0.9348236)	0.000488937	0.00116635	0.0012662	2749	0.0022039	(-0.0031285,0.0075362)	0.417771	0.548192	0.542648	2745	-0.190682	(-0.3474118,-0.0339519)	0.0171204	0.0360937	0.0383006	2539	0.0741022	(0.0015090,0.1466953)	0.0454284	0.0919912	0.088996	1964	0.0940277	(0.0213117,0.1667438)	0.011285	0.0179308	0.0190161	2537
N docosanoyl taurine	NA	NA	n_docosanoyl_taurine	AMIDE	TRUE	NA	NA	TRUE	1.23878	(1.0982937,1.3972362)	0.000489172	0.00116635	0.0012662	1702	3.86e-05	(-0.0063276,0.0064048)	0.990509	0.9946	0.993981	1697	0.194951	(-0.0217493,0.4116507)	0.077824	0.132634	0.138118	1592	0.093027	(-0.0008871,0.1869411)	0.0522003	0.103974	0.100612	1290	0.0779328	(-0.0149031,0.1707688)	0.0998417	0.136103	0.142461	1590
NA	NA	QI9789	mz714_2075_rt7_44	HILIC	FALSE	714.207	7.44	TRUE	0.85753	(0.7864136,0.9350774)	0.000502064	0.00119271	0.00129722	2749	-0.0025662	(-0.0079086,0.0027763)	0.346352	0.476815	0.469885	2745	-0.326203	(-0.4845169,-0.1678891)	5.4948e-05	0.000210292	0.000218876	2539	-0.161132	(-0.2378879,-0.0843769)	3.99626e-05	0.000141508	0.000142426	1964	-0.248509	(-0.3216471,-0.1753714)	3.28473e-11	1.14877e-10	1.25944e-10	2537
NA	NA	QI9449	mz207_2066_rt7_96	HILIC	FALSE	207.207	7.96	TRUE	1.17396	(1.0722724,1.2852830)	0.000521352	0.00123702	0.00134464	2749	0.0007213	(-0.0046450,0.0060877)	0.792125	0.860122	0.857936	2745	0.255163	(0.0946805,0.4156458)	0.00184264	0.00496605	0.00526364	2539	0.0143249	(-0.0647884,0.0934382)	0.722548	0.807378	0.810425	1964	0.366738	(0.2935092,0.4399661)	2.29364e-22	1.6072e-21	1.78754e-21	2537
NA	NA	QI15402	mz549_378_rt1_86	HILIC	FALSE	549.378	1.86	TRUE	0.860644	(0.7906449,0.9368400)	0.000525633	0.00124566	0.00135325	2749	0.0021337	(-0.0031001,0.0073676)	0.424133	0.553019	0.547934	2745	-0.11936	(-0.2695914,0.0308704)	0.119367	0.190909	0.196524	2539	0.150805	(0.0809118,0.2206988)	2.42834e-05	8.77626e-05	8.86066e-05	1964	-0.123826	(-0.1935238,-0.0541289)	0.000502762	0.000949932	0.00101831	2537
Saccharopine	NA	NA	saccharopine	AMIDE	TRUE	NA	NA	TRUE	0.666218	(0.5294839,0.8382630)	0.000529763	0.00125392	0.00136143	502	-0.0182164	(-0.0307924,-0.0056404)	0.00461094	0.0114568	0.0111691	501	-0.451382	(-0.8580453,-0.0447190)	0.0296716	0.0583252	0.0615761	466	-0.155066	(-0.3209923,0.0108609)	0.0669121	0.129825	0.125756	380	-0.0634185	(-0.2376499,0.1108129)	0.474796	0.545665	0.556256	466
NA	NA	QI1459	mz331_1286_rt2_09	HILIC	FALSE	331.129	2.09	TRUE	0.857008	(0.7851371,0.9354588)	0.000554597	0.00131111	0.00142271	2749	0.0022504	(-0.0029833,0.0074842)	0.399234	0.532677	0.526196	2745	-0.0944469	(-0.2497186,0.0608248)	0.233077	0.325706	0.33257	2539	0.0138876	(-0.0634470,0.0912221)	0.724739	0.80905	0.811934	1964	-0.0061484	(-0.0782789,0.0659821)	0.867268	0.894829	0.901205	2537
NA	NA	QI14102	mz610_4305_rt2_46	HILIC	FALSE	610.431	2.46	TRUE	1.17115	(1.0704368,1.2813332)	0.000573926	0.00135516	0.00146966	2749	0.0013406	(-0.0039792,0.0066605)	0.621251	0.727719	0.724288	2745	0.196817	(0.0399878,0.3536471)	0.0139258	0.0299751	0.0317482	2539	-0.0039715	(-0.0794283,0.0714853)	0.917797	0.945962	0.945489	1964	0.145844	(0.0730412,0.2186465)	8.78629e-05	0.000179103	0.000192139	2537
NA	NA	QI14032	mz378_2023_rt2_5	HILIC	FALSE	378.202	2.5	TRUE	0.85982	(0.7888741,0.9371462)	0.000587282	0.00138001	0.00150118	2749	-0.0029633	(-0.0081933,0.0022667)	0.26667	0.391583	0.387442	2745	-0.136013	(-0.2942202,0.0221943)	0.091955	0.15297	0.158872	2539	-0.162186	(-0.2408044,-0.0835673)	5.41686e-05	0.000188766	0.000188997	1964	-0.0902351	(-0.1636745,-0.0167957)	0.0160513	0.0249944	0.0265485	2537
Hippuric acid	HMDB0000714	QI13747	hippurate	HILIC	TRUE	180.065	2.68	TRUE	1.1679	(1.0687294,1.2762708)	0.000607742	0.00142636	0.00155072	2749	-0.0048798	(-0.0100990,0.0003394)	0.0668658	0.121167	0.118524	2745	-0.0583184	(-0.2113393,0.0947026)	0.454936	0.554347	0.566419	2539	-0.0593043	(-0.1321197,0.0135111)	0.110366	0.19706	0.192771	1964	-0.0979612	(-0.1689327,-0.0269897)	0.00684299	0.0112207	0.0119523	2537
NA	NA	QI10096	mz798_5625_rt6_86	HILIC	FALSE	798.562	6.86	TRUE	1.16093	(1.0657098,1.2646678)	0.000632202	0.00148198	0.00161026	2749	0.0145883	(0.0092445,0.0199321)	9.36799e-08	4.55083e-07	4.78068e-07	2745	0.296622	(0.1366815,0.4565629)	0.000281723	0.000916188	0.000959598	2539	0.0896383	(0.0112994,0.1679772)	0.0249404	0.0543444	0.0523639	1964	0.102025	(0.0278075,0.1762417)	0.00707251	0.0115873	0.0123382	2537
N(6),N(6)-Dimethyl-lysine	HMDB0013287	TF36	n6_n6_dimethyllysine	HILIC	TRUE	175.144	10.47	TRUE	1.16074	(1.0652832,1.2647491)	0.000663295	0.00155114	0.00168646	2749	0.0083752	(0.0031035,0.0136469)	0.00185742	0.00507469	0.0049879	2745	0.0307521	(-0.1259181,0.1874223)	0.700346	0.772629	0.783431	2539	0.0127659	(-0.0631282,0.0886601)	0.741523	0.819335	0.822385	1964	0.0573084	(-0.0154602,0.1300770)	0.122642	0.163523	0.170581	2537
NA	NA	QI11802	mz116_071_rt5_33	HILIC	FALSE	116.071	5.33	TRUE	1.16247	(1.0659183,1.2677658)	0.000666719	0.00155728	0.00169217	2749	0.0096771	(0.0043414,0.0150129)	0.000382581	0.00118296	0.0011773	2745	0.305883	(0.1462949,0.4654706)	0.000174818	0.000602735	0.000626723	2539	0.16999	(0.0921542,0.2478265)	1.93215e-05	7.07487e-05	7.17799e-05	1964	0.23637	(0.1626296,0.3101099)	3.83439e-10	1.22449e-09	1.3411e-09	2537
NA	NA	QI15685	mz221_1893_rt1_8	HILIC	FALSE	221.189	1.8	TRUE	0.858947	(0.7868799,0.9376138)	0.000672089	0.00156794	0.00170278	2749	-9.09e-05	(-0.0053847,0.0052029)	0.973141	0.983746	0.984121	2745	-0.167337	(-0.3250261,-0.0096475)	0.0375461	0.0715302	0.0750581	2539	0.0331143	(-0.0427508,0.1089793)	0.392085	0.524575	0.526451	1964	-0.15218	(-0.2252129,-0.0791475)	4.52552e-05	9.42857e-05	0.000101559	2537
Indole-3-lactic acid	NA	NA	indole_3_lactic_acid	AMIDE	TRUE	NA	NA	TRUE	1.17812	(1.0717753,1.2950228)	0.000683778	0.00158984	0.00172934	2749	0.0071703	(0.0022858,0.0120548)	0.00402717	0.0101487	0.00992261	2745	0.152837	(0.0081663,0.2975073)	0.0384048	0.0728457	0.0763835	2539	0.171102	(0.1025494,0.2396556)	1.06393e-06	4.53509e-06	4.65145e-06	1964	0.320092	(0.2539714,0.3862122)	5.00828e-21	3.26292e-20	3.60898e-20	2537
N-Palmitoyl taurine	NA	NA	n_palmitoyl_taurine	AMIDE	TRUE	NA	NA	TRUE	1.23688	(1.0939977,1.3984176)	0.00068776	0.00159495	0.00173635	1702	0.0173889	(0.0112288,0.0235489)	3.56796e-08	1.83387e-07	1.92348e-07	1697	0.392072	(0.1809502,0.6031939)	0.00027857	0.000912024	0.00095767	1592	0.180763	(0.0901849,0.2713418)	9.51094e-05	0.000319988	0.000318661	1290	0.263815	(0.1739434,0.3536874)	1.02154e-08	2.88819e-08	3.19845e-08	1590
NA	NA	QI12502	mz246_9076_rt4_67	HILIC	FALSE	246.908	4.67	TRUE	0.861321	(0.7900531,0.9390173)	0.000704378	0.00163154	0.00177518	2749	-0.0056222	(-0.0109884,-0.0002560)	0.040033	0.0776953	0.0756566	2745	-0.260834	(-0.4207398,-0.1009279)	0.00139818	0.00386883	0.00409182	2539	-0.0847658	(-0.1624086,-0.0071230)	0.0323894	0.068581	0.0658814	1964	-0.118009	(-0.1922833,-0.0437340)	0.00185684	0.00327935	0.00349437	2537
NA	NA	QI4921	mz581_3086_rt5_78	HILIC	FALSE	581.309	5.78	TRUE	1.17256	(1.0691779,1.2859285)	0.000723738	0.0016744	0.00182077	2749	0.0122524	(0.0068869,0.0176178)	7.85483e-06	3.02395e-05	3.05253e-05	2745	0.523977	(0.3650712,0.6828822)	1.204e-10	1.08583e-09	1.18256e-09	2539	0.294029	(0.2168301,0.3712286)	1.20512e-13	1.03417e-12	1.13694e-12	1964	0.297914	(0.2243354,0.3714931)	3.02242e-15	1.45735e-14	1.56468e-14	2537
NA	NA	QI3603	mz283_1285_rt4_56	HILIC	FALSE	283.128	4.56	TRUE	1.16975	(1.0680653,1.2811132)	0.000727091	0.00168016	0.001826	2749	0.0258237	(0.0206601,0.0309874)	2.45642e-22	5.90754e-21	6.17984e-21	2745	0.196455	(0.0435714,0.3493377)	0.0118047	0.0258959	0.0273472	2539	0.256954	(0.1844283,0.3294786)	5.01223e-12	3.82895e-11	4.08383e-11	1964	0.224233	(0.1535714,0.2948947)	5.70449e-10	1.79811e-09	1.96169e-09	2537
NA	NA	QI1915	mz552_0602_rt2_21	HILIC	FALSE	552.06	2.21	TRUE	0.854733	(0.7802843,0.9362857)	0.000735818	0.00169831	0.00184469	2749	-0.0157638	(-0.0210124,-0.0105152)	4.35462e-09	2.48762e-08	2.62375e-08	2745	-0.0912088	(-0.2533668,0.0709492)	0.270156	0.366224	0.375755	2539	-0.141436	(-0.2121586,-0.0707130)	9.08118e-05	0.000306588	0.00030569	1964	-0.135293	(-0.2104438,-0.0601417)	0.000422703	0.0008057	0.00086347	2537
NA	NA	QI5460	mz130_0612_rt6_12	HILIC	FALSE	130.061	6.12	TRUE	1.16069	(1.0643469,1.2657639)	0.000750544	0.00173025	0.00187832	2749	0.0072021	(0.0021779,0.0122262)	0.00497671	0.0122717	0.0119341	2745	-0.0508112	(-0.1943093,0.0926870)	0.487536	0.586972	0.600109	2539	0.0998696	(0.0371891,0.1625501)	0.00180555	0.00501027	0.00495059	1964	0.183987	(0.1177353,0.2502392)	5.66044e-08	1.48206e-07	1.64313e-07	2537
NA	NA	QI3770	mz171_0762_rt4_73	HILIC	FALSE	171.076	4.73	TRUE	1.18333	(1.0728104,1.3052310)	0.0007658	0.00176333	0.00191317	2749	-0.0023733	(-0.0074856,0.0027390)	0.362748	0.494149	0.487974	2745	-0.114201	(-0.2669515,0.0385502)	0.142766	0.221954	0.227727	2539	0.0307595	(-0.0420472,0.1035662)	0.407454	0.540207	0.54127	1964	-0.0694686	(-0.1404174,0.0014802)	0.0549712	0.0784497	0.0823706	2537
NA	NA	QI7282	mz156_1019_rt8_95	HILIC	FALSE	156.102	8.95	TRUE	0.863357	(0.7924699,0.9405859)	0.000775963	0.00178252	0.00193518	2749	0.0046235	(-0.0007482,0.0099951)	0.0915799	0.159823	0.156232	2745	-0.500696	(-0.6606775,-0.3407154)	9.72548e-10	8.131e-09	8.88302e-09	2539	0.0855678	(0.0095048,0.1616307)	0.0274827	0.0596173	0.0574493	1964	0.0242077	(-0.0506626,0.0990780)	0.526128	0.593455	0.603574	2537
NA	NA	QI8	mz279_137_rt1_41	HILIC	FALSE	279.137	1.41	TRUE	1.1921	(1.0759391,1.3207969)	0.000781502	0.00179255	0.00194391	2749	-0.0103056	(-0.0155652,-0.0050459)	0.000124821	0.000410036	0.000405881	2745	0.111719	(-0.0474717,0.2709102)	0.168897	0.25328	0.257932	2539	-0.0125529	(-0.0923766,0.0672707)	0.757802	0.83401	0.836557	1964	-0.138465	(-0.2122373,-0.0646935)	0.000237642	0.000465253	0.000499675	2537
NA	NA	QI6788	mz482_3604_rt8_06	HILIC	FALSE	482.36	8.06	TRUE	0.859379	(0.7866505,0.9388307)	0.000782171	0.00179255	0.00194391	2749	0.0035247	(-0.0018402,0.0088897)	0.197769	0.305273	0.299473	2745	-0.328683	(-0.4886438,-0.1687229)	5.7611e-05	0.000220051	0.000228848	2539	-0.101199	(-0.1801598,-0.0222375)	0.0120338	0.02838	0.0275662	1964	-0.0678473	(-0.1422499,0.0065554)	0.0738741	0.102938	0.108208	2537
NA	NA	QI4353	mz165_0909_rt5_29	HILIC	FALSE	165.091	5.29	TRUE	1.15763	(1.0625082,1.2612740)	0.000820155	0.00187519	0.00203478	2749	0.0021941	(-0.0031126,0.0075008)	0.417596	0.548192	0.542648	2745	0.0897496	(-0.0679650,0.2474642)	0.264581	0.361088	0.370155	2539	0.0334968	(-0.0405418,0.1075355)	0.375036	0.505235	0.507839	1964	0.19387	(0.1210057,0.2667340)	1.96179e-07	4.93742e-07	5.41001e-07	2537
NA	NA	QI620	mz407_2788_rt1_83	HILIC	FALSE	407.279	1.83	TRUE	0.8669	(0.7972514,0.9426330)	0.000830309	0.00189618	0.00205641	2749	-0.0147784	(-0.0200801,-0.0094766)	5.02439e-08	2.52255e-07	2.63919e-07	2745	-0.148508	(-0.3051889,0.0081736)	0.0631988	0.111615	0.116787	2539	-0.0964958	(-0.1696551,-0.0233365)	0.00975995	0.0233855	0.0227944	1964	-0.262532	(-0.3346578,-0.1904057)	1.23611e-12	4.70301e-12	5.1083e-12	2537
1-Methyladenosine	HMDB0003331	QI6715	mz320_0749_rt7_88	HILIC	FALSE	320.075	7.88	TRUE	1.16125	(1.0636319,1.2678328)	0.000847168	0.00193242	0.00209455	2749	0.0180016	(0.0127063,0.0232969)	3.16729e-11	2.24359e-10	2.46842e-10	2745	0.207794	(0.0501666,0.3654218)	0.00979392	0.0220053	0.0232525	2539	0.212167	(0.1359927,0.2883404)	5.29453e-08	2.66505e-07	2.78108e-07	1964	0.0213872	(-0.0519874,0.0947619)	0.567669	0.633344	0.643508	2537
NA	NA	QI6721	mz580_2793_rt7_9	HILIC	FALSE	580.279	7.9	TRUE	1.16637	(1.0651540,1.2772125)	0.000891434	0.00202627	0.0022002	2749	0.0130268	(0.0077124,0.0183412)	1.6194e-06	6.77223e-06	6.93478e-06	2745	0.345984	(0.1883690,0.5035987)	1.73786e-05	7.37549e-05	7.73941e-05	2539	0.217974	(0.1396102,0.2963375)	5.51343e-08	2.76808e-07	2.8855e-07	1964	0.274303	(0.2015394,0.3470672)	1.95255e-13	7.94064e-13	8.56256e-13	2537
NA	NA	QI4617	mz766_5717_rt5_52	HILIC	FALSE	766.572	5.52	TRUE	0.863275	(0.7913703,0.9417121)	0.000921581	0.00208979	0.0022693	2749	-0.0090303	(-0.0143878,-0.0036728)	0.000961866	0.00276359	0.00274218	2745	-0.202865	(-0.3623792,-0.0433509)	0.0127012	0.0276755	0.0293293	2539	-0.177387	(-0.2560822,-0.0986911)	1.03785e-05	3.91051e-05	3.95818e-05	1964	-0.409705	(-0.4821123,-0.3372972)	5.76287e-28	5.14957e-27	5.69928e-27	2537
Homoarginine	HMDB0000670	TF19	homoarginine	HILIC	TRUE	189.135	9.42	TRUE	0.860685	(0.7875895,0.9405651)	0.000922597	0.00208979	0.0022693	2749	0.0145509	(0.0093396,0.0197622)	4.77209e-08	2.40208e-07	2.51587e-07	2745	0.0524106	(-0.1002681,0.2050892)	0.500929	0.597556	0.610308	2539	0.245241	(0.1711471,0.3193343)	1.07559e-10	7.15102e-10	7.56076e-10	1964	0.196646	(0.1260824,0.2672088)	5.09118e-08	1.34217e-07	1.49315e-07	2537
NA	NA	QI14425	mz201_0329_rt2_13	HILIC	FALSE	201.033	2.13	TRUE	1.18353	(1.0711891,1.3076526)	0.000928175	0.00209998	0.00227911	2749	0.0133335	(0.0081128,0.0185542)	5.85276e-07	2.61495e-06	2.71614e-06	2745	0.0776272	(-0.0713738,0.2266283)	0.307068	0.407749	0.416984	2539	0.285546	(0.2183379,0.3527532)	1.46945e-16	1.59027e-15	1.74148e-15	1964	0.28335	(0.2150047,0.3516950)	6.66363e-16	3.37162e-15	3.61956e-15	2537
LPC(20:4)	HMDB0010395	QI6706	c20_4_lpc	HILIC	TRUE	544.34	7.87	TRUE	1.1625	(1.0631831,1.2711005)	0.000951301	0.00214732	0.00233191	2749	-0.0009873	(-0.0063286,0.0043540)	0.717055	0.795519	0.794696	2745	0.21061	(0.0515832,0.3696363)	0.00945982	0.0213037	0.0225339	2539	-0.0782077	(-0.1546283,-0.0017872)	0.0448826	0.0911692	0.0882876	1964	0.292235	(0.2191081,0.3653621)	6.77465e-15	3.17236e-14	3.40872e-14	2537
Caffeine	HMDB0001847	QI13505	caffeine	HILIC	TRUE	195.088	3.03	TRUE	1.1686	(1.0651764,1.2820729)	0.000982837	0.00221593	0.0024051	2749	0.012891	(0.0075263,0.0182558)	2.57909e-06	1.05993e-05	1.08141e-05	2745	0.384468	(0.2267150,0.5422210)	1.86224e-06	9.96605e-06	1.07187e-05	2539	0.288423	(0.2095760,0.3672711)	1.02883e-12	8.31602e-12	8.99599e-12	1964	0.2621	(0.1893117,0.3348887)	2.12811e-12	8.01849e-12	8.74415e-12	2537
Hydroxyproline	HMDB0000725	QI9405	hydroxyproline	HILIC	TRUE	132.066	8.06	TRUE	1.15815	(1.0610308,1.2641648)	0.00101751	0.00228881	0.00248571	2749	0.0050107	(-0.0002751,0.0102964)	0.0631635	0.115533	0.112657	2745	0.211043	(0.0560349,0.3660514)	0.00763904	0.0176313	0.0186575	2539	0.121194	(0.0455038,0.1968849)	0.00171351	0.00478212	0.00473444	1964	-0.0622599	(-0.1342436,0.0097238)	0.0900058	0.12356	0.129717	2537
NA	NA	QI7335	mz156_042_rt9_16	HILIC	FALSE	156.042	9.16	TRUE	0.858291	(0.7834518,0.9402797)	0.0010277	0.00230907	0.00250633	2749	-0.0025368	(-0.0076746,0.0026010)	0.333046	0.465286	0.459432	2745	-0.255897	(-0.4093245,-0.1024688)	0.0010879	0.00308926	0.0032501	2539	-0.08718	(-0.1629391,-0.0114209)	0.0241286	0.0528118	0.0509579	1964	-0.206668	(-0.2776736,-0.1356621)	1.28108e-08	3.59071e-08	3.97634e-08	2537
2-Aminooctanoic acid	HMDB0000991	QI6031	_2_aminooctanoate	HILIC	TRUE	160.133	6.63	TRUE	0.864278	(0.7921676,0.9429535)	0.00103298	0.00231825	0.00251493	2749	-0.0108931	(-0.0161586,-0.0056276)	5.12014e-05	0.000177159	0.000173988	2745	-0.18448	(-0.3404772,-0.0284838)	0.0204772	0.0423007	0.0448995	2539	-0.0846094	(-0.1616030,-0.0076157)	0.0312706	0.0665739	0.0639644	1964	-0.209805	(-0.2817810,-0.1378299)	1.21886e-08	3.42618e-08	3.79966e-08	2537
NA	NA	QI15454	mz405_2996_rt1_85	HILIC	FALSE	405.3	1.85	TRUE	0.869294	(0.7994030,0.9452953)	0.00105473	0.00236434	0.00256353	2749	-0.0059658	(-0.0113194,-0.0006121)	0.0289709	0.0584216	0.0570659	2745	-0.0512321	(-0.2069784,0.1045142)	0.518966	0.613066	0.624327	2539	0.027595	(-0.0457217,0.1009117)	0.460513	0.589796	0.592265	1964	-0.0609891	(-0.1333034,0.0113252)	0.0982914	0.134263	0.140617	2537
NA	NA	QI3704	mz271_165_rt4_69	HILIC	FALSE	271.165	4.69	TRUE	1.16027	(1.0614674,1.2682615)	0.00106161	0.00237703	0.00257589	2749	0.0190636	(0.0138797,0.0242475)	7.16197e-13	6.11909e-12	6.71259e-12	2745	0.307994	(0.1552758,0.4607116)	7.87497e-05	0.000293878	0.000305208	2539	0.14413	(0.0722003,0.2160592)	8.79913e-05	0.000298619	0.000298297	1964	0.0749241	(0.0038017,0.1460465)	0.0389567	0.0571599	0.0602146	2537
NA	NA	QI15169	mz564_5344_rt1_95	HILIC	FALSE	564.534	1.95	TRUE	0.866688	(0.7954253,0.9443351)	0.00108207	0.00241863	0.00261813	2749	0.0041	(-0.0011663,0.0093663)	0.126985	0.208925	0.204603	2745	0.101432	(-0.0534098,0.2562729)	0.199076	0.288327	0.294001	2539	0.117444	(0.0442315,0.1906572)	0.00167996	0.00471197	0.00466291	1964	0.292542	(0.2214616,0.3636218)	1.07106e-15	5.32251e-15	5.73097e-15	2537
NA	NA	QI1023	mz463_2324_rt1_95	HILIC	FALSE	463.232	1.95	TRUE	1.16373	(1.0625748,1.2745213)	0.00108267	0.00241863	0.00261813	2749	0.0149592	(0.0096237,0.0202947)	4.20575e-08	2.13191e-07	2.23372e-07	2745	0.415501	(0.2563725,0.5746288)	3.28267e-07	1.9261e-06	2.1397e-06	2539	0.187308	(0.1107806,0.2638352)	1.70535e-06	7.0233e-06	7.1505e-06	1964	0.0093072	(-0.0649631,0.0835775)	0.805911	0.841777	0.849762	2537
Homocysteine	HMDB0000742	QI6381	mz119_0164_rt7_4	HILIC	FALSE	119.016	7.4	TRUE	0.863142	(0.7899595,0.9431040)	0.00113053	0.00251976	0.00272926	2749	-0.0106195	(-0.0159143,-0.0053246)	8.60838e-05	0.000292145	0.000287749	2745	-0.174519	(-0.3317445,-0.0172942)	0.029603	0.058308	0.0615228	2539	-0.212055	(-0.2873080,-0.1368021)	3.7057e-08	1.93531e-07	2.00527e-07	1964	-0.167387	(-0.2400717,-0.0947033)	6.59534e-06	1.4974e-05	1.62504e-05	2537
Zeaxanthin	NA	QI843	mz568_427_rt1_88	HILIC	FALSE	568.427	1.88	TRUE	0.864588	(0.7918317,0.9440303)	0.00117792	0.00261939	0.00283889	2749	-0.0353048	(-0.0404088,-0.0302007)	1.31736e-40	1.42568e-38	1.45315e-38	2745	-0.430922	(-0.5872540,-0.2745897)	7.08064e-08	4.50754e-07	5.05156e-07	2539	-0.337292	(-0.4132899,-0.2612937)	6.66734e-18	8.37934e-17	9.3735e-17	1964	-0.201185	(-0.2737776,-0.1285933)	6.01837e-08	1.57366e-07	1.7435e-07	2537
NA	NA	QI9427	mz600_2673_rt8_02	HILIC	FALSE	600.267	8.02	TRUE	0.865129	(0.7923642,0.9445766)	0.00122947	0.0027278	0.00295815	2749	0.0041205	(-0.0012022,0.0094433)	0.129144	0.211761	0.20715	2745	-0.112209	(-0.2714242,0.0470073)	0.167106	0.251227	0.256069	2539	0.106037	(0.0280417,0.1840322)	0.00773264	0.0190432	0.0186363	1964	0.241763	(0.1683610,0.3151646)	1.26265e-10	4.23346e-10	4.6666e-10	2537
NA	NA	QI9235	mz512_1107_rt8_27	HILIC	FALSE	512.111	8.27	TRUE	0.870652	(0.8004834,0.9469723)	0.0012342	0.00273518	0.00296456	2749	-0.0073311	(-0.0127086,-0.0019536)	0.00755781	0.017824	0.0172853	2745	-0.148925	(-0.3110922,0.0132416)	0.0718557	0.124312	0.129775	2539	0.0140543	(-0.0635639,0.0916726)	0.722546	0.807378	0.810425	1964	-0.0448868	(-0.1202473,0.0304737)	0.24293	0.306892	0.317558	2537
CAR(2:0)	HMDB0000201	QI7260	c2_carnitine	HILIC	TRUE	204.123	8.89	TRUE	0.861366	(0.7867580,0.9430485)	0.00124441	0.00275467	0.00298409	2749	0.0069689	(0.0017630,0.0121747)	0.00871609	0.0201411	0.0196215	2745	-0.0777053	(-0.2307704,0.0753597)	0.3196	0.419246	0.427924	2539	-0.170933	(-0.2449613,-0.0969052)	6.30008e-06	2.44473e-05	2.48195e-05	1964	0.0146185	(-0.0564855,0.0857224)	0.686874	0.738702	0.745343	2537
NA	NA	QI14947	mz357_2994_rt2_02	HILIC	FALSE	357.299	2.02	TRUE	1.16042	(1.0601836,1.2701329)	0.00124705	0.00275738	0.00298543	2749	0.0047138	(-0.0006539,0.0100815)	0.0851891	0.150044	0.146652	2745	0.277422	(0.1166235,0.4382207)	0.000727625	0.00217729	0.00230334	2539	0.101116	(0.0210459,0.1811868)	0.0133458	0.0310234	0.030091	1964	0.438566	(0.3655983,0.5115346)	2.98317e-31	3.07472e-30	3.44989e-30	2537
NA	NA	QI3599	mz418_5532_rt4_55	HILIC	FALSE	418.553	4.55	TRUE	0.873444	(0.8044839,0.9483155)	0.00126128	0.00278253	0.00301446	2749	-0.0181944	(-0.0235139,-0.0128748)	2.41042e-11	1.74554e-10	1.93103e-10	2745	-0.289718	(-0.4506876,-0.1287479)	0.000424111	0.00133253	0.00139171	2539	-0.14741	(-0.2246814,-0.0701377)	0.000188347	0.000608458	0.00060831	1964	-0.173616	(-0.2482615,-0.0989702)	5.33859e-06	1.22204e-05	1.32909e-05	2537
NA	NA	QI624	mz379_2837_rt1_83	HILIC	FALSE	379.284	1.83	TRUE	0.871675	(0.8017252,0.9477287)	0.0012915	0.00283955	0.00308155	2749	-0.0049356	(-0.0102519,0.0003806)	0.0687977	0.124321	0.121497	2745	0.0059345	(-0.1487217,0.1605907)	0.940027	0.960741	0.964234	2539	0.0595442	(-0.0127035,0.1317919)	0.106182	0.190857	0.186474	1964	-0.107711	(-0.1793994,-0.0360233)	0.00324582	0.0055708	0.00592176	2537
NA	NA	QI11571	mz772_5246_rt5_52	HILIC	FALSE	772.525	5.52	TRUE	0.865883	(0.7928116,0.9456884)	0.00136767	0.00300363	0.00325787	2749	0.0006836	(-0.0046598,0.0060269)	0.801957	0.866582	0.864147	2745	0.0022623	(-0.1571889,0.1617135)	0.977807	0.988515	0.989591	2539	0.068372	(-0.0095274,0.1462714)	0.0853511	0.158952	0.154733	1964	-0.250062	(-0.3236430,-0.1764818)	3.25623e-11	1.14291e-10	1.25522e-10	2537
Cryptoxanthin	HMDB0002268	QI338	mz552_4321_rt1_74	HILIC	FALSE	552.432	1.74	TRUE	0.868535	(0.7965511,0.9470234)	0.00140768	0.00308802	0.00334762	2749	-0.0264407	(-0.0317293,-0.0211520)	2.52933e-22	6.0087e-21	6.25355e-21	2745	-0.470173	(-0.6286138,-0.3117314)	6.66795e-09	4.90157e-08	5.46391e-08	2539	-0.291203	(-0.3691768,-0.2132300)	3.49083e-13	2.88141e-12	3.12866e-12	1964	-0.113126	(-0.1870402,-0.0392118)	0.00271571	0.00469823	0.00499914	2537
N-myristoyl-glycine	NA	QI14127	mz286_2372_rt2_43	HILIC	FALSE	286.237	2.43	TRUE	0.868635	(0.7966115,0.9471706)	0.00142774	0.00312499	0.0033897	2749	0.0196934	(0.0143817,0.0250051)	4.66982e-13	4.06108e-12	4.46435e-12	2745	0.0093001	(-0.1491224,0.1677226)	0.908364	0.93621	0.940501	2539	0.193696	(0.1162661,0.2711268)	1.0063e-06	4.31778e-06	4.42649e-06	1964	0.160372	(0.0870193,0.2337247)	1.87756e-05	4.06387e-05	4.37792e-05	2537
NA	NA	QI14793	mz240_0728_rt2_07	HILIC	FALSE	240.073	2.07	TRUE	1.16274	(1.0595237,1.2760036)	0.00147749	0.00323025	0.00350202	2749	0.0332379	(0.0281474,0.0383283)	1.71332e-36	1.39064e-34	1.36494e-34	2745	0.252408	(0.0977536,0.4070634)	0.00138963	0.00386163	0.0040815	2539	0.43212	(0.3604074,0.5038329)	3.53341e-31	1.14718e-29	1.36944e-29	1964	0.41931	(0.3492329,0.4893869)	5.38497e-31	5.4635e-30	6.12861e-30	2537
CAR(18:0)	HMDB0000848	QI6070	c18_carnitine	HILIC	TRUE	428.373	6.75	TRUE	0.858898	(0.7819024,0.9434757)	0.00150259	0.00328144	0.00355563	2749	-0.0067303	(-0.0116992,-0.0017614)	0.00795488	0.0186251	0.0181068	2745	0.0124011	(-0.1353814,0.1601836)	0.869313	0.906058	0.909923	2539	-0.185821	(-0.2574714,-0.1141705)	4.00192e-07	1.8004e-06	1.86323e-06	1964	-0.161347	(-0.2297444,-0.0929494)	3.92149e-06	9.04031e-06	9.83115e-06	2537
NA	NA	QI9774	mz712_0416_rt7_46	HILIC	FALSE	712.042	7.46	TRUE	0.867286	(0.7941813,0.9471209)	0.00152861	0.00333453	0.00361125	2749	0.0090445	(0.0037537,0.0143353)	0.000813194	0.00236787	0.0023558	2745	0.0326466	(-0.1243226,0.1896159)	0.683433	0.760759	0.772295	2539	0.105675	(0.0301082,0.1812426)	0.00615161	0.0155225	0.0152093	1964	0.0067306	(-0.0661011,0.0795622)	0.856216	0.886243	0.892307	2537
AMP	NA	NA	amp	AMIDE	TRUE	NA	NA	TRUE	1.20123	(1.0722069,1.3457696)	0.00156371	0.00340728	0.00368809	1549	0.002553	(-0.0052387,0.0103448)	0.520513	0.639406	0.635734	1549	0.38014	(0.1778928,0.5823873)	0.000235463	0.000788113	0.000827583	1413	-0.01045	(-0.1194807,0.0985806)	0.850859	0.898847	0.897816	1054	0.086479	(-0.0138431,0.1868011)	0.0910639	0.124836	0.130979	1413
NA	NA	QI3876	mz178_0169_rt4_82	HILIC	FALSE	178.017	4.82	TRUE	0.873386	(0.8030903,0.9498356)	0.00156635	0.00340922	0.00368825	2749	0.0034906	(-0.0018893,0.0088705)	0.203404	0.312239	0.306686	2745	-0.177762	(-0.3375677,-0.0179555)	0.0292585	0.0576878	0.060895	2539	0.0478037	(-0.0288468,0.1244541)	0.221438	0.343988	0.337811	1964	0.0469601	(-0.0273606,0.1212808)	0.215456	0.275761	0.285285	2537
NA	NA	QI13326	mz224_0915_rt3_35	HILIC	FALSE	224.091	3.35	TRUE	1.15938	(1.0575744,1.2709848)	0.00161201	0.00350078	0.00378954	2749	0.0114591	(0.0062581,0.0166602)	1.61468e-05	5.97984e-05	5.98011e-05	2745	0.139291	(-0.0142353,0.2928177)	0.0753462	0.129431	0.134889	2539	0.248692	(0.1776509,0.3197335)	8.86641e-12	6.61754e-11	7.06357e-11	1964	0.236401	(0.1656041,0.3071977)	7.04821e-11	2.40454e-10	2.65279e-10	2537
NA	NA	QI2479	mz131_0492_rt2_74	HILIC	FALSE	131.049	2.74	TRUE	0.869419	(0.7969706,0.9484537)	0.00162096	0.00351629	0.00380435	2749	-0.0127656	(-0.0180302,-0.0075010)	2.09089e-06	8.66607e-06	8.84465e-06	2745	-0.256266	(-0.4116984,-0.1008338)	0.00124071	0.00347854	0.00368464	2539	-0.199934	(-0.2750216,-0.1248465)	1.95801e-07	9.08144e-07	9.4221e-07	1964	-0.346004	(-0.4171296,-0.2748776)	3.25783e-21	2.13679e-20	2.35946e-20	2537
NA	NA	QI3684	mz186_2216_rt4_66	HILIC	FALSE	186.222	4.66	TRUE	0.869389	(0.7968483,0.9485324)	0.0016404	0.0035545	0.00384368	2749	-0.0045552	(-0.0099407,0.0008303)	0.0973239	0.167332	0.163422	2745	-0.384109	(-0.5443394,-0.2238777)	2.73142e-06	1.41135e-05	1.49498e-05	2539	-0.0455529	(-0.1249072,0.0338014)	0.260387	0.384559	0.381794	1964	-0.0373399	(-0.1120777,0.0373979)	0.327333	0.400279	0.412837	2537
NA	NA	QI4307	mz617_26_rt5_26	HILIC	FALSE	617.26	5.26	TRUE	0.872819	(0.8019438,0.9499577)	0.00164351	0.00355729	0.00384469	2749	-0.0036661	(-0.0090100,0.0016778)	0.178678	0.279122	0.274037	2745	0.277925	(0.1214677,0.4343815)	0.000503715	0.00156497	0.00163793	2539	-0.0925186	(-0.1699589,-0.0150784)	0.0192271	0.0432	0.041712	1964	0.0585552	(-0.0142754,0.1313858)	0.115025	0.153789	0.160453	2537
SM(d18:1/14:0)	HMDB0012097	QI9794	c14_0_sm	HILIC	TRUE	675.542	7.44	TRUE	0.863919	(0.7885639,0.9464745)	0.00168168	0.00363586	0.00392757	2749	0.0140609	(0.0089357,0.0191860)	8.0994e-08	3.97421e-07	4.16292e-07	2745	0.0856622	(-0.0664162,0.2377406)	0.269468	0.365546	0.375162	2539	0.115868	(0.0420893,0.1896459)	0.00209881	0.00575843	0.0056894	1964	0.154504	(0.0841469,0.2248609)	1.72455e-05	3.74101e-05	4.02769e-05	2537
Stearic acid	NA	NA	stearic_acid	AMIDE	TRUE	NA	NA	TRUE	0.831571	(0.7410041,0.9332068)	0.00171877	0.00371193	0.00400767	1702	-0.0071196	(-0.0135292,-0.0007100)	0.029498	0.0592393	0.0577871	1697	0.342592	(0.1395953,0.5455891)	0.000952859	0.00275805	0.00290723	1592	-0.017594	(-0.1040410,0.0688530)	0.689757	0.782617	0.782587	1290	0.0160916	(-0.0711333,0.1033166)	0.717506	0.766398	0.773612	1590
NA	NA	QI4647	mz764_5561_rt5_55	HILIC	FALSE	764.556	5.55	TRUE	0.870157	(0.7973146,0.9496551)	0.00182058	0.00392311	0.00423817	2749	-0.0063371	(-0.0116572,-0.0010169)	0.0195816	0.0415522	0.0404611	2745	-0.066979	(-0.2235417,0.0895837)	0.401609	0.50214	0.513744	2539	-0.119269	(-0.1964107,-0.0421267)	0.00245995	0.00668338	0.00660593	1964	-0.380366	(-0.4515713,-0.3091613)	3.6562e-25	2.84891e-24	3.17757e-24	2537
LPC(20:1)	NA	QI6635	mz588_3422_rt7_76	HILIC	FALSE	588.342	7.76	TRUE	0.87005	(0.7966292,0.9502377)	0.00196991	0.0042402	0.00457836	2749	-0.0214609	(-0.0267178,-0.0162039)	1.7493e-15	1.94722e-14	2.1813e-14	2745	-0.46822	(-0.6265660,-0.3098739)	7.53235e-09	5.43445e-08	6.10248e-08	2539	-0.419171	(-0.4965891,-0.3417538)	1.19791e-25	2.59281e-24	3.12328e-24	1964	-0.177795	(-0.2514703,-0.1041202)	2.34416e-06	5.46877e-06	5.9496e-06	2537
NA	NA	QI3725	mz361_2733_rt4_7	HILIC	FALSE	361.273	4.7	TRUE	0.874126	(0.8025779,0.9520524)	0.00201717	0.00433236	0.00468062	2749	-0.016509	(-0.0218100,-0.0112080)	1.16168e-09	7.0119e-09	7.37717e-09	2745	-0.26174	(-0.4215520,-0.1019279)	0.00133669	0.00372514	0.00394406	2539	-0.258334	(-0.3352845,-0.1813832)	5.86607e-11	4.06659e-10	4.31382e-10	1964	-0.330301	(-0.4035356,-0.2570666)	1.6942e-18	9.91082e-18	1.07977e-17	2537
LPC(18:1)	HMDB0002815	QI6711	c18_1_lpc	HILIC	TRUE	522.355	7.88	TRUE	0.869905	(0.7960965,0.9505560)	0.00206374	0.00442262	0.00478094	2749	-0.019857	(-0.0251604,-0.0145535)	2.76729e-13	2.50729e-12	2.73675e-12	2745	-0.37241	(-0.5324777,-0.2123412)	5.30397e-06	2.52003e-05	2.65014e-05	2539	-0.293468	(-0.3717241,-0.2152121)	2.80041e-13	2.34129e-12	2.54164e-12	1964	0.08718	(0.0126689,0.1616910)	0.0218543	0.0331817	0.0350941	2537
NA	NA	QI14660	mz756_633_rt2_1	HILIC	FALSE	756.633	2.1	TRUE	0.877066	(0.8068257,0.9534224)	0.00207086	0.00443301	0.0047897	2749	-0.0038299	(-0.0091557,0.0014959)	0.158635	0.252056	0.247802	2745	-0.0433509	(-0.1994265,0.1127247)	0.586041	0.677512	0.688838	2539	-0.0062169	(-0.0801724,0.0677386)	0.86907	0.910677	0.910842	1964	-0.0309101	(-0.1034596,0.0416394)	0.403542	0.479037	0.490406	2537
NA	NA	QI15962	mz678_5651_rt1_68	HILIC	FALSE	678.565	1.68	TRUE	1.1604	(1.0554062,1.2758466)	0.00210949	0.00451074	0.00487119	2749	0.0112449	(0.0059555,0.0165344)	3.16007e-05	0.000112332	0.000111067	2745	0.431948	(0.2751710,0.5887253)	7.17916e-08	4.55538e-07	5.09649e-07	2539	0.117136	(0.0405308,0.1937412)	0.0027445	0.00737419	0.00728817	1964	0.627612	(0.5586177,0.6966059)	3.90897e-67	1.00193e-65	1.09911e-65	2537
NA	NA	QI6055	mz132_0806_rt6_69	HILIC	FALSE	132.081	6.69	TRUE	0.875757	(0.8043727,0.9534770)	0.00222726	0.00475214	0.00513487	2749	0.0007803	(-0.0044327,0.0059933)	0.76916	0.844126	0.842609	2745	0.0781123	(-0.0678470,0.2240716)	0.294091	0.393198	0.402411	2539	0.151662	(0.0862595,0.2170635)	5.75266e-06	2.24124e-05	2.27882e-05	1964	0.0114065	(-0.0563677,0.0791807)	0.74141	0.785782	0.792237	2537
Piperine	HMDB0029377	QI14799	piperine	HILIC	TRUE	286.144	2.07	TRUE	1.15228	(1.0520938,1.2620133)	0.0022569	0.0047998	0.00517844	2749	0.018188	(0.0128511,0.0235249)	2.83542e-11	2.01584e-10	2.22185e-10	2745	0.36718	(0.2118165,0.5225437)	3.76259e-06	1.88905e-05	1.99835e-05	2539	0.29878	(0.2226295,0.3749306)	2.23064e-14	2.04966e-13	2.23688e-13	1964	0.18874	(0.1166035,0.2608762)	3.10762e-07	7.74123e-07	8.4721e-07	2537
NA	NA	QI1095	mz119_086_rt1_98	HILIC	FALSE	119.086	1.98	TRUE	0.873977	(0.8016162,0.9528697)	0.00225201	0.00479969	0.00517844	2749	-0.004617	(-0.0099571,0.0007230)	0.0901257	0.157799	0.154466	2745	-0.144111	(-0.3024265,0.0142048)	0.0743875	0.128123	0.133506	2539	-0.0351387	(-0.1122484,0.0419710)	0.371591	0.501983	0.505082	1964	-0.120457	(-0.1939263,-0.0469880)	0.00132077	0.00237787	0.00253545	2537
NA	NA	QI10987	mz282_2789_rt5_98	HILIC	FALSE	282.279	5.98	TRUE	1.14812	(1.0507302,1.2545372)	0.00225699	0.0047998	0.00517844	2749	0.0177686	(0.0124272,0.0231101)	8.18981e-11	5.49503e-10	5.94508e-10	2745	0.369339	(0.2094848,0.5291924)	6.15374e-06	2.88855e-05	3.02208e-05	2539	0.210647	(0.1339369,0.2873562)	8.09602e-08	3.94276e-07	4.08792e-07	1964	0.080293	(0.0058655,0.1547204)	0.0344901	0.0512094	0.0539943	2537
NA	NA	QI12764	mz414_2999_rt4_3	HILIC	FALSE	414.3	4.3	TRUE	1.14643	(1.0500668,1.2516368)	0.0022843	0.00485258	0.00523273	2749	-0.00015	(-0.0055222,0.0052222)	0.956346	0.973843	0.974006	2745	0.198119	(0.0374555,0.3587814)	0.0156742	0.0333698	0.0353965	2539	0.198743	(0.1184638,0.2790232)	1.29816e-06	5.4855e-06	5.62405e-06	1964	0.128051	(0.0534403,0.2026612)	0.00077569	0.00143227	0.00153004	2537
Arachidonoyl-EA	NA	QI14666	mz348_2884_rt2_1	HILIC	FALSE	348.288	2.1	TRUE	0.874562	(0.8023344,0.9532925)	0.00230679	0.00489502	0.00527582	2749	0.0106396	(0.0053045,0.0159747)	9.43805e-05	0.000317536	0.000312567	2745	-0.0352884	(-0.1927191,0.1221423)	0.660308	0.743085	0.753887	2539	0.0502184	(-0.0255859,0.1260228)	0.194019	0.310558	0.305404	1964	-0.0189805	(-0.0919370,0.0539761)	0.609991	0.671628	0.679816	2537
NA	NA	QI12667	mz289_2523_rt4_44	HILIC	FALSE	289.252	4.44	TRUE	1.15214	(1.0515956,1.2623074)	0.00236766	0.00501872	0.00540641	2749	0.0087515	(0.0034915,0.0140116)	0.00111841	0.00317589	0.00314471	2745	0.169106	(0.0149779,0.3232337)	0.0315343	0.0617375	0.065065	2539	0.169617	(0.0937808,0.2454539)	1.2136e-05	4.55509e-05	4.60397e-05	1964	0.22896	(0.1578124,0.3001068)	3.27485e-10	1.0597e-09	1.16241e-09	2537
NA	NA	QI6471	mz358_258_rt7_57	HILIC	FALSE	358.258	7.57	TRUE	0.872876	(0.7995622,0.9529113)	0.00238505	0.00505008	0.00543746	2749	0.0042691	(-0.0010605,0.0095986)	0.116375	0.194424	0.19007	2745	-0.296795	(-0.4536639,-0.1399250)	0.000211721	0.000716029	0.000747803	2539	0.0560881	(-0.0195800,0.1317562)	0.14619	0.24915	0.244332	1964	-0.0605636	(-0.1336212,0.0124940)	0.104169	0.140722	0.146881	2537
NA	NA	QI598	mz265_216_rt1_82	HILIC	FALSE	265.216	1.82	TRUE	0.87247	(0.7988099,0.9529217)	0.00243343	0.00513022	0.00552142	2749	-0.0039415	(-0.0090725,0.0011895)	0.132114	0.215543	0.21097	2745	-0.233611	(-0.3834062,-0.0838162)	0.00225072	0.00598962	0.0063285	2539	-0.0201054	(-0.0912181,0.0510074)	0.579318	0.692338	0.695182	1964	-0.282739	(-0.3515670,-0.2139103)	1.20977e-15	5.99652e-15	6.44911e-15	2537
NA	NA	QI14301	mz338_0499_rt2_2	HILIC	FALSE	338.05	2.2	TRUE	0.872567	(0.7989731,0.9529393)	0.00242767	0.00512918	0.00552142	2749	-0.0125817	(-0.0179265,-0.0072369)	4.09572e-06	1.63493e-05	1.66381e-05	2745	-0.0836034	(-0.2432968,0.0760900)	0.304716	0.404902	0.414183	2539	-0.102856	(-0.1773843,-0.0283278)	0.00685643	0.0171675	0.0168358	1964	-0.109756	(-0.1838178,-0.0356933)	0.00369339	0.00627264	0.00669573	2537
NA	NA	QI976	mz229_1434_rt1_93	HILIC	FALSE	229.143	1.93	TRUE	1.15044	(1.0507907,1.2595300)	0.00243133	0.00513022	0.00552142	2749	-0.0030768	(-0.0084607,0.0023071)	0.262561	0.386598	0.381858	2745	0.105181	(-0.0524764,0.2628385)	0.190919	0.279212	0.284592	2539	0.0972159	(0.0247627,0.1696691)	0.00856869	0.0208095	0.0202651	1964	0.0232137	(-0.0500725,0.0964998)	0.534574	0.599856	0.610334	2537
NA	NA	QI2565	mz458_2021_rt2_85	HILIC	FALSE	458.202	2.85	TRUE	1.15215	(1.0510281,1.2629923)	0.00251208	0.0052903	0.00569087	2749	-0.0005641	(-0.0059169,0.0047887)	0.83631	0.894145	0.890326	2745	-0.0078725	(-0.1640764,0.1483314)	0.921283	0.94705	0.951815	2539	0.134166	(0.0582099,0.2101230)	0.000543378	0.00164109	0.00163698	1964	0.155399	(0.0830909,0.2277069)	2.59421e-05	5.54722e-05	5.98086e-05	2537
NA	NA	NA	inosine_15n4	AMIDE	TRUE	NA	NA	TRUE	0.704877	(0.5608612,0.8858715)	0.00270695	0.00568226	0.00611302	502	-0.0126358	(-0.0250444,-0.0002273)	0.0459647	0.0878697	0.0859366	501	-0.220104	(-0.6066751,0.1664666)	0.263769	0.360577	0.369741	466	-0.129534	(-0.2768462,0.0177782)	0.084631	0.158216	0.154182	380	-0.124626	(-0.2889683,0.0397163)	0.136852	0.180983	0.188155	466
NA	NA	QI6780	mz506_361_rt8_04	HILIC	FALSE	506.361	8.04	TRUE	0.87739	(0.8055130,0.9556800)	0.00270441	0.00568226	0.00611302	2749	0.0002462	(-0.0051456,0.0056381)	0.92865	0.955631	0.955983	2745	-0.309214	(-0.4694959,-0.1489321)	0.00015857	0.000552584	0.00057713	2539	-0.0988302	(-0.1759789,-0.0216815)	0.0120733	0.0284043	0.0275687	1964	-0.0402306	(-0.1149113,0.0344502)	0.290914	0.361186	0.372807	2537
NA	NA	QI3785	mz490_2071_rt4_74	HILIC	FALSE	490.207	4.74	TRUE	1.14999	(1.0495837,1.2600019)	0.00271611	0.00569535	0.00612406	2749	0.0165445	(0.0112319,0.0218570)	1.16265e-09	7.0119e-09	7.37717e-09	2745	0.406	(0.2546692,0.5573314)	1.55415e-07	9.64167e-07	1.07147e-06	2539	0.228175	(0.1560640,0.3002866)	6.63276e-10	4.22242e-09	4.40342e-09	1964	0.321309	(0.2516382,0.3909791)	2.94646e-19	1.77151e-18	1.94711e-18	2537
CAR(10:1)	HMDB0013205	QI6365	mz314_2321_rt7_37	HILIC	FALSE	314.232	7.37	TRUE	0.870848	(0.7955483,0.9532742)	0.00272605	0.00571005	0.00613682	2749	0.006693	(0.0014474,0.0119386)	0.012412	0.0276643	0.0270088	2745	-0.0697616	(-0.2247032,0.0851800)	0.377382	0.478919	0.4893	2539	0.0776536	(0.0027917,0.1525156)	0.0420548	0.0861858	0.0834116	1964	0.0049966	(-0.0669489,0.0769421)	0.891687	0.915875	0.920792	2537
NA	NA	QI15377	mz307_2264_rt1_87	HILIC	FALSE	307.226	1.87	TRUE	0.877136	(0.8049777,0.9557621)	0.00276275	0.0057745	0.00619997	2749	-0.0069256	(-0.0122642,-0.0015870)	0.011022	0.0249371	0.0243162	2745	-0.159116	(-0.3166093,-0.0016224)	0.0476879	0.0877205	0.0917912	2539	0.0108949	(-0.0636261,0.0854158)	0.774356	0.847441	0.849599	1964	-0.203216	(-0.2759968,-0.1304346)	4.80203e-08	1.2727e-07	1.4169e-07	2537
NA	NA	QI513	mz231_1591_rt1_8	HILIC	FALSE	231.159	1.8	TRUE	0.87663	(0.8042145,0.9555669)	0.00276108	0.0057745	0.00619997	2749	-0.0011887	(-0.0065585,0.0041812)	0.664286	0.7563	0.754823	2745	-0.126959	(-0.2850392,0.0311219)	0.115416	0.186118	0.192224	2539	0.0158624	(-0.0610209,0.0927456)	0.685798	0.780336	0.779267	1964	-0.102611	(-0.1759195,-0.0293017)	0.00609978	0.0100783	0.0107326	2537
NA	NA	QI12791	mz501_0541_rt4_24	HILIC	FALSE	501.054	4.24	TRUE	0.876765	(0.8043546,0.9556939)	0.00278628	0.00581744	0.00624301	2749	-0.007607	(-0.0129621,-0.0022520)	0.00538269	0.0130681	0.0127163	2745	-0.130015	(-0.2893781,0.0293484)	0.109772	0.1779	0.183894	2539	-0.0081056	(-0.0871625,0.0709513)	0.840659	0.892427	0.891646	1964	-0.0524874	(-0.1265152,0.0215404)	0.164553	0.214701	0.222822	2537
NA	NA	QI8614	mz241_1545_rt10_21	HILIC	FALSE	241.155	10.21	TRUE	1.14844	(1.0487126,1.2576450)	0.00282463	0.0058912	0.00631906	2749	0.0060328	(0.0012775,0.0107880)	0.0129199	0.0286	0.0279023	2745	-0.111203	(-0.2465033,0.0240976)	0.107161	0.173958	0.17994	2539	0.0749979	(0.0163516,0.1336442)	0.0122225	0.0286861	0.0278207	1964	0.183378	(0.1208335,0.2459218)	1.00366e-08	2.84176e-08	3.14934e-08	2537
NA	NA	QI9389	mz316_175_rt8_08	HILIC	FALSE	316.175	8.08	TRUE	1.14827	(1.0479294,1.2582251)	0.00304252	0.00633885	0.00679591	2749	0.0062294	(0.0010778,0.0113810)	0.0178064	0.0381594	0.0371139	2745	-0.08081	(-0.2331817,0.0715617)	0.298458	0.397672	0.406833	2539	-0.0782811	(-0.1503901,-0.0061722)	0.0333752	0.0705151	0.0676945	1964	-0.125635	(-0.1962790,-0.0549913)	0.000496186	0.00093933	0.00100783	2537
NA	NA	QI13382	mz363_1935_rt3_25	HILIC	FALSE	363.193	3.25	TRUE	1.146	(1.0471606,1.2541653)	0.00306285	0.00637439	0.00683068	2749	0.0075853	(0.0022928,0.0128778)	0.00498505	0.0122767	0.0119342	2745	0.134682	(-0.0218999,0.2912636)	0.0917947	0.152963	0.158872	2539	0.0732711	(-0.0034363,0.1499784)	0.0611729	0.120247	0.116342	1964	0.18605	(0.1137661,0.2583328)	4.80284e-07	1.17013e-06	1.27612e-06	2537
N-Arachidonoyl dopamine	NA	NA	n_arachidonoyl_dopamine	AMIDE	TRUE	NA	NA	TRUE	1.2063	(1.0650627,1.3662668)	0.00315631	0.0065549	0.00702818	1659	-0.0014418	(-0.0078913,0.0050078)	0.661112	0.754892	0.753605	1654	0.0692291	(-0.1540568,0.2925150)	0.543173	0.63741	0.649633	1551	0.135324	(0.0382896,0.2323577)	0.00630674	0.0158523	0.0155393	1259	0.0706921	(-0.0242516,0.1656358)	0.144364	0.190014	0.197536	1549
PC(33:0)	NA	QI10104	mz748_5835_rt6_84	HILIC	FALSE	748.583	6.84	TRUE	0.876188	(0.8024513,0.9566995)	0.0032099	0.00665909	0.00713643	2749	-0.0141605	(-0.0195014,-0.0088197)	2.15259e-07	1.00799e-06	1.05352e-06	2745	-0.217552	(-0.3759646,-0.0591393)	0.00712887	0.0165914	0.0175649	2539	-0.21547	(-0.2918822,-0.1390573)	3.62796e-08	1.8998e-07	1.97064e-07	1964	0.0407948	(-0.0328686,0.1144581)	0.277606	0.346208	0.357992	2537
NA	NA	QI10139	mz764_5576_rt6_69	HILIC	FALSE	764.558	6.69	TRUE	0.874837	(0.8003727,0.9562280)	0.00321812	0.00666904	0.00714363	2749	0.0017813	(-0.0035801,0.0071427)	0.514795	0.635904	0.632778	2745	-0.0734795	(-0.2334869,0.0865280)	0.367942	0.469693	0.480536	2539	-0.0570324	(-0.1351332,0.0210683)	0.152265	0.2577	0.252718	1964	-0.236653	(-0.3104592,-0.1628468)	3.7884e-10	1.2118e-09	1.32826e-09	2537
NA	NA	QI799	mz453_3211_rt1_86	HILIC	FALSE	453.321	1.86	TRUE	0.881124	(0.8099029,0.9586087)	0.00325077	0.0067224	0.00720495	2749	-0.0025837	(-0.0078660,0.0026986)	0.337596	0.46974	0.463709	2745	-0.0245332	(-0.1785339,0.1294676)	0.754776	0.816812	0.825225	2539	0.0844548	(0.0141065,0.1548032)	0.018649	0.0420466	0.0406423	1964	-0.204381	(-0.2755015,-0.1332603)	1.94318e-08	5.30156e-08	5.89116e-08	2537
PE(O-34:3)	HMDB0011343	QI4722	c34_3_pe_plasmalogen	HILIC	TRUE	700.527	5.63	TRUE	0.878016	(0.8050996,0.9575367)	0.00327271	0.00676059	0.00724239	2749	-0.0033293	(-0.0086894,0.0020308)	0.223357	0.339127	0.333292	2745	-0.235308	(-0.3953043,-0.0753108)	0.00396096	0.00985434	0.0105577	2539	-0.0368476	(-0.1152966,0.0416015)	0.357077	0.486424	0.488596	1964	-0.468397	(-0.5405152,-0.3962790)	4.66188e-36	5.64059e-35	6.30673e-35	2537
N-Acetyl-D-tryptophan	HMDB0013713	QI2622	n_acetyltryptophan	HILIC	TRUE	247.107	2.92	TRUE	1.14781	(1.0467270,1.2586630)	0.00338025	0.0069606	0.00746884	2749	-0.0069004	(-0.0119939,-0.0018070)	0.00794239	0.0186183	0.0181068	2745	0.0413456	(-0.1095424,0.1922337)	0.591096	0.681738	0.693643	2539	0.0807618	(0.0071870,0.1543366)	0.0314603	0.0668317	0.0641736	1964	0.273482	(0.2042911,0.3426723)	1.3138e-14	5.92426e-14	6.30097e-14	2537
NA	NA	QI680	mz441_2848_rt1_84	HILIC	FALSE	441.285	1.84	TRUE	0.880398	(0.8084744,0.9587196)	0.00339546	0.00698454	0.00749091	2749	-0.0058627	(-0.0111384,-0.0005870)	0.0294168	0.0591372	0.0577068	2745	-0.246618	(-0.4023324,-0.0909046)	0.00191955	0.00515053	0.00545076	2539	-0.203754	(-0.2766113,-0.1308967)	4.67948e-08	2.40518e-07	2.49456e-07	1964	-0.232079	(-0.3039587,-0.1601984)	2.86943e-10	9.33164e-10	1.02613e-09	2537
NA	NA	QI15703	mz259_1901_rt1_79	HILIC	FALSE	259.19	1.79	TRUE	0.8773	(0.8036588,0.9576882)	0.00342859	0.00704525	0.00755238	2749	-0.0070471	(-0.0124070,-0.0016873)	0.00998663	0.0227798	0.0222373	2745	-0.0685265	(-0.2266099,0.0895570)	0.395396	0.495964	0.506701	2539	-0.0612445	(-0.1367485,0.0142595)	0.111818	0.198517	0.194023	1964	-0.22403	(-0.2969849,-0.1510749)	1.97868e-09	5.94825e-09	6.49297e-09	2537
N-lignoceroyl taurine	NA	NA	n_lignoceroyl_taurine	AMIDE	TRUE	NA	NA	TRUE	1.19539	(1.0604797,1.3474610)	0.00348842	0.00716063	0.00767238	1702	-0.004558	(-0.0108767,0.0017607)	0.157305	0.250721	0.246625	1697	0.0742465	(-0.1405300,0.2890230)	0.497832	0.595373	0.607994	1592	0.0115218	(-0.0799804,0.1030239)	0.804927	0.869512	0.869509	1290	-0.0892779	(-0.1811922,0.0026365)	0.056935	0.0809872	0.0850467	1590
NA	NA	QI11967	mz169_097_rt5_16	HILIC	FALSE	169.097	5.16	TRUE	1.14685	(1.0460509,1.2573678)	0.00351021	0.00719778	0.00770849	2749	0.0017325	(-0.0036510,0.0071159)	0.52808	0.645794	0.642296	2745	0.383475	(0.2232331,0.5437171)	2.8406e-06	1.46002e-05	1.54296e-05	2539	0.0475836	(-0.0334108,0.1285781)	0.249389	0.373522	0.369393	1964	0.107843	(0.0331721,0.1825150)	0.00466216	0.00782465	0.00834882	2537
Adipic acid	NA	NA	adipic_acid	AMIDE	TRUE	NA	NA	TRUE	1.13721	(1.0430528,1.2398613)	0.0035466	0.00726475	0.00777649	2749	0.0061505	(0.0008143,0.0114867)	0.0238953	0.0496248	0.0483298	2745	0.220657	(0.0618039,0.3795094)	0.0064975	0.0152129	0.0161201	2539	-0.0225613	(-0.0980227,0.0529000)	0.557708	0.675631	0.679485	1964	0.0694603	(-0.0044143,0.1433349)	0.0653393	0.091966	0.0966941	2537
NA	NA	QI7403	mz318_2131_rt9_46	HILIC	FALSE	318.213	9.46	TRUE	1.14728	(1.0455827,1.2588696)	0.00371755	0.00758302	0.00813888	2749	-0.0001411	(-0.0054340,0.0051517)	0.958303	0.975326	0.975306	2745	-0.166578	(-0.3241873,-0.0089681)	0.0383219	0.0727593	0.0763245	2539	-0.0362846	(-0.1132071,0.0406379)	0.355031	0.484653	0.486725	1964	0.046555	(-0.0266858,0.1197958)	0.21272	0.272438	0.281923	2537
NA	NA	QI8948	mz172_133_rt8_84	HILIC	FALSE	172.133	8.84	TRUE	0.874042	(0.7976780,0.9577157)	0.00389931	0.00793715	0.0085238	2749	0.0021356	(-0.0028289,0.0071001)	0.39902	0.532677	0.526196	2745	0.0220106	(-0.1259720,0.1699932)	0.770571	0.829322	0.83712	2539	-0.0031364	(-0.0723662,0.0660933)	0.92921	0.953186	0.952457	1964	-0.0370902	(-0.1058156,0.0316353)	0.290032	0.36055	0.372342	2537
NA	NA	QI9382	mz550_2908_rt8_08	HILIC	FALSE	550.291	8.08	TRUE	1.13933	(1.0423664,1.2453126)	0.00404941	0.0082255	0.00883844	2749	-0.0118423	(-0.0171690,-0.0065155)	1.35303e-05	5.06866e-05	5.09251e-05	2745	-0.065121	(-0.2249536,0.0947115)	0.424403	0.525246	0.537153	2539	-0.336433	(-0.4136258,-0.2592399)	2.49086e-17	2.94072e-16	3.27697e-16	1964	-0.105675	(-0.1798538,-0.0314967)	0.00525309	0.00875365	0.00933449	2537
PC(P-35:1)_PC(O-35:2)	NA	QI10141	mz780_5884_rt6_69	HILIC	FALSE	780.588	6.69	TRUE	0.878768	(0.8045239,0.9598626)	0.00411038	0.00833197	0.00895788	2749	-0.0083632	(-0.0137028,-0.0030235)	0.00215336	0.00581795	0.0057078	2745	-0.0931482	(-0.2518255,0.0655290)	0.249797	0.34389	0.352568	2539	-0.256333	(-0.3334994,-0.1791667)	9.23448e-11	6.18171e-10	6.52327e-10	1964	-0.340995	(-0.4134961,-0.2684933)	5.92445e-20	3.67542e-19	4.04555e-19	2537
NA	NA	QI2364	mz218_1386_rt2_6	HILIC	FALSE	218.139	2.6	TRUE	1.14029	(1.0424032,1.2473649)	0.00414581	0.00838633	0.00900771	2749	0.0061209	(0.0007788,0.0114630)	0.0247384	0.0510492	0.0498242	2745	0.460575	(0.3010376,0.6201122)	1.6743e-08	1.14843e-07	1.2771e-07	2539	0.105155	(0.0252164,0.1850934)	0.00995734	0.0237707	0.0231423	1964	0.0771268	(0.0026145,0.1516391)	0.0424908	0.0617702	0.0649593	2537
NA	NA	QI6357	mz740_0719_rt7_35	HILIC	FALSE	740.072	7.35	TRUE	0.881955	(0.8093791,0.9610390)	0.00414401	0.00838633	0.00900771	2749	0.0056552	(0.0003049,0.0110055)	0.0383039	0.0747655	0.0728485	2745	0.0540795	(-0.1041905,0.2123496)	0.502904	0.599545	0.612194	2539	0.0254776	(-0.0527164,0.1036715)	0.522897	0.644278	0.647525	1964	-0.0650014	(-0.1384832,0.0084804)	0.0829337	0.114578	0.120371	2537
LPC(18:2)	NA	QI9464	mz558_295_rt7_93	HILIC	FALSE	558.295	7.93	TRUE	0.874991	(0.7984200,0.9589051)	0.00426243	0.00861329	0.00924709	2749	-0.0318291	(-0.0368563,-0.0268018)	1.80719e-34	1.30385e-32	1.29576e-32	2745	-0.385418	(-0.5376456,-0.2331901)	7.3376e-07	4.16724e-06	4.57483e-06	2539	-0.316458	(-0.3908268,-0.2420893)	1.32313e-16	1.45619e-15	1.60794e-15	1964	-0.443258	(-0.5121660,-0.3743509)	2.01282e-35	2.39084e-34	2.64806e-34	2537
NA	NA	QI12809	mz450_0478_rt4_22	HILIC	FALSE	450.048	4.22	TRUE	0.880829	(0.8072716,0.9610882)	0.00434436	0.00876975	0.00941059	2749	-0.0059651	(-0.0113422,-0.0005880)	0.0296972	0.0595166	0.0580188	2745	0.0017778	(-0.1579367,0.1614924)	0.982588	0.991514	0.991853	2539	-0.0387453	(-0.1181313,0.0406406)	0.338596	0.47046	0.471042	1964	0.010065	(-0.0640958,0.0842259)	0.79016	0.827915	0.834589	2537
NA	NA	QI15846	mz550_4168_rt1_75	HILIC	FALSE	550.417	1.75	TRUE	0.881127	(0.8076768,0.9612560)	0.00437528	0.00882303	0.00946328	2749	-0.0320769	(-0.0372571,-0.0268968)	4.40293e-33	2.76674e-31	2.74513e-31	2745	-0.176875	(-0.3349467,-0.0188038)	0.0283141	0.055939	0.059101	2539	-0.311414	(-0.3875370,-0.2352909)	1.75891e-15	1.80335e-14	1.95525e-14	1964	-0.106477	(-0.1796163,-0.0333384)	0.00434246	0.00731757	0.00782297	2537
NA	NA	QI467	mz564_4609_rt1_78	HILIC	FALSE	564.461	1.78	TRUE	0.883363	(0.8107869,0.9624352)	0.00457813	0.00922254	0.00988711	2749	-0.0120674	(-0.0172746,-0.0068603)	5.75459e-06	2.25552e-05	2.29225e-05	2745	-0.215943	(-0.3672275,-0.0646578)	0.00516537	0.0123766	0.013227	2539	-0.0563213	(-0.1279892,0.0153465)	0.123425	0.216216	0.211966	1964	-0.352723	(-0.4217010,-0.2837445)	3.1228e-23	2.24473e-22	2.47409e-22	2537
NA	NA	QI7253	mz217_0817_rt8_86	HILIC	FALSE	217.082	8.86	TRUE	0.878036	(0.8025009,0.9606815)	0.00459777	0.00925254	0.00991459	2749	0.0001336	(-0.0051969,0.0054641)	0.960811	0.975407	0.975781	2745	-0.0820442	(-0.2414305,0.0773420)	0.312891	0.413016	0.421766	2539	-0.0376313	(-0.1165179,0.0412553)	0.349625	0.479626	0.480232	1964	0.0464671	(-0.0276365,0.1205707)	0.218964	0.279883	0.289663	2537
NA	NA	QI12438	mz476_191_rt4_71	HILIC	FALSE	476.191	4.71	TRUE	1.13948	(1.0409802,1.2473001)	0.00464543	0.0093388	0.0100023	2749	0.0006321	(-0.0047200,0.0059842)	0.816879	0.87819	0.875489	2745	0.180288	(0.0245812,0.3359943)	0.023263	0.0468628	0.0496416	2539	0.0900892	(0.0132903,0.1668880)	0.0215209	0.0479665	0.0462683	1964	0.17941	(0.1073563,0.2514643)	1.11252e-06	2.63969e-06	2.8797e-06	2537
SM(d18:1/20:0)	HMDB0012102	QI6315	c20_0_sm	HILIC	TRUE	759.635	7.25	TRUE	0.879204	(0.8039848,0.9614611)	0.00478401	0.00959758	0.0102853	2749	0.0065412	(0.0012793,0.0118031)	0.0148497	0.0325391	0.0316882	2745	-0.0543193	(-0.2104813,0.1018427)	0.495252	0.593328	0.606483	2539	0.0585171	(-0.0174601,0.1344943)	0.131082	0.227786	0.223244	1964	-0.0296757	(-0.1021514,0.0428000)	0.422105	0.497736	0.508654	2537
PE(P-34:0)_PE(O-34:1)	NA	QI11410	mz704_5571_rt5_69	HILIC	FALSE	704.557	5.69	TRUE	0.882965	(0.8096852,0.9628760)	0.00486604	0.0097521	0.010446	2749	-0.0137296	(-0.0190418,-0.0084174)	4.29119e-07	1.94854e-06	2.0242e-06	2745	-0.0229168	(-0.1827668,0.1369332)	0.778639	0.834776	0.842058	2539	-0.223732	(-0.3026392,-0.1448240)	3.05629e-08	1.61784e-07	1.68566e-07	1964	-0.251288	(-0.3248901,-0.1776851)	2.65128e-11	9.35633e-11	1.02478e-10	2537
NA	NA	QI1839	mz231_0723_rt2_16	HILIC	FALSE	231.072	2.16	TRUE	1.13741	(1.0398213,1.2441655)	0.00490643	0.00982295	0.0105169	2749	0.0297091	(0.0246143,0.0348039)	1.3093e-29	6.07266e-28	6.25714e-28	2745	0.118826	(-0.0365018,0.2741536)	0.133715	0.209387	0.214963	2539	0.372069	(0.2969887,0.4471490)	7.73245e-22	1.27651e-20	1.47844e-20	1964	0.391836	(0.3211685,0.4625043)	6.06471e-27	5.11431e-26	5.72158e-26	2537
NA	NA	QI9655	mz148_0966_rt7_67	HILIC	FALSE	148.097	7.67	TRUE	1.14623	(1.0422239,1.2606190)	0.00492189	0.00984378	0.0105343	2749	-0.0034233	(-0.0082717,0.0014251)	0.166326	0.262563	0.25785	2745	0.149614	(0.0048788,0.2943486)	0.0427669	0.0798753	0.0834391	2539	0.0472935	(-0.0224656,0.1170527)	0.183809	0.297392	0.292869	1964	0.228152	(0.1614959,0.2948075)	2.3633e-11	8.35519e-11	9.15938e-11	2537
NA	NA	QI1446	mz318_1332_rt2_08	HILIC	FALSE	318.133	2.08	TRUE	0.885727	(0.8138497,0.9639525)	0.00495133	0.0098925	0.0105815	2749	-0.0108283	(-0.0161529,-0.0055036)	6.84975e-05	0.000234505	0.000230036	2745	-0.218187	(-0.3736792,-0.0626956)	0.00597357	0.0140538	0.0149235	2539	-0.191038	(-0.2661070,-0.1159689)	6.54266e-07	2.89394e-06	2.97847e-06	1964	-0.10596	(-0.1782614,-0.0336590)	0.00408975	0.00690966	0.00739559	2537
IMP	NA	NA	imp	AMIDE	TRUE	NA	NA	TRUE	1.38243	(1.1016810,1.7347284)	0.00517312	0.0103145	0.0110391	502	0.0051342	(-0.0075132,0.0177817)	0.425491	0.554048	0.549194	501	0.623735	(0.2275322,1.0199375)	0.00209703	0.00560602	0.00592214	466	0.129568	(-0.0282954,0.2874304)	0.107398	0.19229	0.187816	380	0.159922	(-0.0098536,0.3296979)	0.0647991	0.0913564	0.0960134	466
NA	NA	QI11949	mz302_1347_rt5_18	HILIC	FALSE	302.135	5.18	TRUE	1.13598	(1.0386243,1.2424522)	0.00528722	0.0105312	0.0112658	2749	0.0028554	(-0.0025354,0.0082462)	0.299081	0.428587	0.424832	2745	0.554238	(0.3944429,0.7140336)	1.28928e-11	1.25576e-10	1.41132e-10	2539	0.0562602	(-0.0233067,0.1358270)	0.165689	0.27516	0.269998	1964	0.112908	(0.0381272,0.1876883)	0.00309818	0.00532679	0.00566682	2537
NA	NA	QI6301	mz340_2477_rt7_21	HILIC	FALSE	340.248	7.21	TRUE	0.880671	(0.8054074,0.9629676)	0.00530583	0.0105575	0.0112887	2749	0.0100113	(0.0047584,0.0152641)	0.000189969	0.000612681	0.000609431	2745	-0.0832699	(-0.2376611,0.0711213)	0.290339	0.388448	0.397656	2539	0.160961	(0.0865995,0.2353226)	2.28698e-05	8.28074e-05	8.36615e-05	1964	0.0699572	(-0.0017303,0.1416447)	0.0557874	0.0795563	0.0835064	2537
NA	NA	QI7090	mz240_1017_rt8_54	HILIC	FALSE	240.102	8.54	TRUE	0.886164	(0.8139524,0.9647819)	0.0053251	0.010585	0.0113129	2749	0.0071964	(0.0018217,0.0125710)	0.0087018	0.020132	0.0196201	2745	-0.0866897	(-0.2441859,0.0708066)	0.280545	0.377418	0.386457	2539	0.118642	(0.0417381,0.1955455)	0.00251394	0.00679217	0.0067132	1964	0.101041	(0.0280139,0.1740678)	0.00671035	0.0110217	0.0117349	2537
LPE(20:1)	HMDB0011512	QI9458	c20_1_lpe	HILIC	TRUE	508.34	7.94	TRUE	0.882766	(0.8085121,0.9638391)	0.00541018	0.0107432	0.0114766	2749	-0.0167693	(-0.0221027,-0.0114360)	8.07001e-10	5.00278e-09	5.27302e-09	2745	-0.257354	(-0.4179066,-0.0968015)	0.00169055	0.00461878	0.00487776	2539	-0.228889	(-0.3065370,-0.1512418)	8.61388e-09	4.82179e-08	5.04176e-08	1964	0.169688	(0.0953076,0.2440687)	8.03442e-06	1.79691e-05	1.93962e-05	2537
NA	NA	QI7388	mz157_1698_rt9_39	HILIC	FALSE	157.17	9.39	TRUE	0.883071	(0.8088834,0.9640624)	0.00547903	0.0108688	0.0116055	2749	-0.0007761	(-0.0061556,0.0046034)	0.777286	0.848741	0.847626	2745	-0.108862	(-0.2648631,0.0471384)	0.171314	0.256116	0.26079	2539	-0.0236097	(-0.0990629,0.0518436)	0.539511	0.658914	0.662379	1964	-0.0060784	(-0.0786367,0.0664799)	0.869532	0.896216	0.90225	2537
NA	NA	QI14871	mz253_216_rt2_05	HILIC	FALSE	253.216	2.05	TRUE	0.877649	(0.8004068,0.9623442)	0.0054938	0.010887	0.0116196	2749	-0.0018822	(-0.0069641,0.0031998)	0.467765	0.595949	0.592034	2745	-0.0961033	(-0.2451728,0.0529662)	0.206286	0.29591	0.301515	2539	-0.025156	(-0.0969116,0.0465996)	0.49182	0.616394	0.619332	1964	-0.177291	(-0.2461730,-0.1084091)	4.80546e-07	1.17013e-06	1.27612e-06	2537
NA	NA	QI10128	mz792_5507_rt6_73	HILIC	FALSE	792.551	6.73	TRUE	0.883449	(0.8086845,0.9651261)	0.00601885	0.0119033	0.0127114	2749	-0.012231	(-0.0174698,-0.0069921)	4.90582e-06	1.94239e-05	1.97057e-05	2745	-0.261972	(-0.4171946,-0.1067500)	0.000947855	0.00274765	0.00289813	2539	-0.0689386	(-0.1473258,0.0094486)	0.0847247	0.158239	0.154182	1964	-0.0060794	(-0.0780069,0.0658481)	0.868376	0.895498	0.901703	2537
NA	NA	QI10291	mz538_4833_rt6_47	HILIC	FALSE	538.483	6.47	TRUE	0.881954	(0.8062392,0.9647786)	0.00608951	0.0120186	0.0128417	2749	-0.0044197	(-0.0095617,0.0007224)	0.0920327	0.160214	0.156554	2745	0.140805	(-0.0146099,0.2962204)	0.0757598	0.129912	0.135292	2539	-0.0212523	(-0.0969924,0.0544879)	0.58218	0.69448	0.696867	1964	0.160586	(0.0885449,0.2326274)	1.28657e-05	2.81917e-05	3.03944e-05	2537
NA	NA	QI8984	mz202_1438_rt8_79	HILIC	FALSE	202.144	8.79	TRUE	1.13384	(1.0362477,1.2406236)	0.00623159	0.0122866	0.013122	2749	0.0041555	(-0.0011161,0.0094271)	0.122299	0.202584	0.19839	2745	0.352695	(0.1955774,0.5098120)	1.11803e-05	4.9163e-05	5.18798e-05	2539	0.0637951	(-0.0121275,0.1397177)	0.099532	0.181714	0.177523	1964	0.104178	(0.0310861,0.1772700)	0.0052311	0.00872447	0.00930694	2537
NA	NA	QI15558	mz267_2317_rt1_83	HILIC	FALSE	267.232	1.83	TRUE	0.882171	(0.8063306,0.9651455)	0.00626708	0.0123329	0.0131774	2749	-0.0016037	(-0.0067758,0.0035683)	0.543236	0.657175	0.653524	2745	-0.162558	(-0.3130885,-0.0120280)	0.0343074	0.0662347	0.0695853	2539	-0.0209589	(-0.0918073,0.0498895)	0.561867	0.679402	0.683294	1964	-0.203083	(-0.2723909,-0.1337742)	1.02501e-08	2.8938e-08	3.20232e-08	2537
LPC(20:1)	HMDB0010391	QI6611	c20_1_lpc	HILIC	TRUE	550.387	7.75	TRUE	0.884748	(0.8102870,0.9660516)	0.00633427	0.0124387	0.0132992	2749	-0.0177799	(-0.0230617,-0.0124982)	4.89475e-11	3.41755e-10	3.73355e-10	2745	-0.404909	(-0.5636460,-0.2461715)	6.06569e-07	3.46509e-06	3.815e-06	2539	-0.372585	(-0.4500924,-0.2950776)	1.14188e-20	1.72433e-19	2.02155e-19	1964	-0.15659	(-0.2304020,-0.0827783)	3.28842e-05	6.95531e-05	7.49697e-05	2537
NA	NA	QI2799	mz257_2264_rt3_22	HILIC	FALSE	257.226	3.22	TRUE	1.16137	(1.0430683,1.2930836)	0.00634796	0.012453	0.0133084	2749	0.0010629	(-0.0034918,0.0056176)	0.647282	0.746317	0.744167	2745	0.0850952	(-0.0503101,0.2205006)	0.217942	0.308092	0.315367	2539	0.0640782	(-0.0008068,0.1289632)	0.0529145	0.105074	0.101715	1964	0.0362001	(-0.0266922,0.0990924)	0.259143	0.325894	0.336909	2537
CAR(8:0)	HMDB0000791	QI6463	c8_carnitine	HILIC	TRUE	288.216	7.54	TRUE	0.881733	(0.8055076,0.9651728)	0.00636484	0.0124735	0.0133244	2749	0.0035646	(-0.0017274,0.0088565)	0.18669	0.289924	0.284802	2745	0.0818647	(-0.0732377,0.2369671)	0.300775	0.400212	0.409214	2539	0.0238899	(-0.0521447,0.0999245)	0.537836	0.65728	0.660888	1964	0.0192036	(-0.0528237,0.0912308)	0.601155	0.664528	0.67325	2537
NA	NA	QI14960	mz242_1749_rt2_02	HILIC	FALSE	242.175	2.02	TRUE	0.885154	(0.8106609,0.9664919)	0.0065317	0.0127877	0.0136537	2749	-0.001237	(-0.0066259,0.0041520)	0.652688	0.750263	0.747693	2745	-0.106591	(-0.2662705,0.0530891)	0.190668	0.279054	0.284514	2539	-0.002633	(-0.0802908,0.0750248)	0.946992	0.966504	0.966538	1964	-0.062479	(-0.1365734,0.0116155)	0.0983535	0.134263	0.140617	2537
NA	NA	QI10993	mz146_081_rt5_97	HILIC	FALSE	146.081	5.97	TRUE	1.13181	(1.0350961,1.2375591)	0.00659065	0.0128901	0.0137569	2749	0.0097772	(0.0045241,0.0150304)	0.000267648	0.00084777	0.000843532	2745	-0.289681	(-0.4446363,-0.1347261)	0.000251622	0.000835025	0.000875791	2539	0.121754	(0.0465856,0.1969221)	0.00151325	0.00428461	0.0042549	1964	0.0731311	(0.0010890,0.1451732)	0.0466387	0.0671984	0.0704741	2537
NA	NA	QI10729	mz152_043_rt6_13	HILIC	FALSE	152.043	6.13	TRUE	1.13503	(1.0358170,1.2437499)	0.00664758	0.0129885	0.0138556	2749	0.0089744	(0.0038618,0.0140870)	0.000586175	0.00174865	0.00172958	2745	0.365094	(0.2145292,0.5156580)	2.0971e-06	1.11312e-05	1.19335e-05	2539	0.184194	(0.1178145,0.2505730)	5.92957e-08	2.95417e-07	3.06968e-07	1964	0.24578	(0.1763195,0.3152395)	5.01354e-12	1.84969e-11	2.0195e-11	2537
Glycochenodeoxycholic acid	NA	NA	glycochenodeoxycholic_acid	AMIDE	TRUE	NA	NA	TRUE	1.12836	(1.0340094,1.2313201)	0.00671568	0.0131084	0.0139771	2749	-0.0016214	(-0.0069976,0.0037548)	0.554325	0.667795	0.66519	2745	0.18439	(0.0237892,0.3449904)	0.024448	0.0489463	0.051785	2539	0.16638	(0.0863166,0.2464438)	4.77444e-05	0.000167881	0.000168634	1964	0.0792087	(0.0045667,0.1538508)	0.037546	0.0553668	0.0583326	2537
NA	NA	QI1227	mz111_0807_rt2_02	HILIC	FALSE	111.081	2.02	TRUE	0.883664	(0.8080567,0.9663445)	0.0067254	0.0131142	0.0139771	2749	-0.0050144	(-0.0103846,0.0003558)	0.0672226	0.1217	0.119009	2745	-0.192122	(-0.3528096,-0.0314351)	0.019129	0.0399392	0.0424628	2539	-0.0458579	(-0.1255895,0.0338737)	0.259467	0.384074	0.381225	1964	-0.0662665	(-0.1409755,0.0084426)	0.0821023	0.113671	0.119406	2537
N-Arachidonoyl taurine	NA	NA	n_arachidonoyl_taurine	AMIDE	TRUE	NA	NA	TRUE	1.17609	(1.0448472,1.3238093)	0.0072168	0.0140583	0.0149767	1702	0.0177413	(0.0113735,0.0241091)	5.33253e-08	2.65672e-07	2.78067e-07	1697	0.372147	(0.1569112,0.5873836)	0.000712439	0.00213544	0.00226059	1592	0.170604	(0.0769781,0.2642297)	0.000363496	0.00111931	0.0011115	1290	0.019286	(-0.0731967,0.1117687)	0.682569	0.73583	0.742643	1590
NA	NA	QI9231	mz344_0591_rt8_28	HILIC	FALSE	344.059	8.28	TRUE	0.892012	(0.8204920,0.9697654)	0.00736329	0.0143294	0.0152586	2749	-0.0011513	(-0.0065376,0.0042350)	0.675169	0.763337	0.761158	2745	-0.194279	(-0.3534631,-0.0350947)	0.016774	0.0354017	0.0375842	2539	0.0968425	(0.0210257,0.1726593)	0.0123239	0.0288199	0.0279628	1964	-0.038221	(-0.1122227,0.0357807)	0.311261	0.38303	0.395348	2537
NA	NA	QI6015	mz476_3062_rt6_6	HILIC	FALSE	476.306	6.6	TRUE	1.12215	(1.0313365,1.2209676)	0.00743844	0.0144612	0.0153921	2749	0.0072672	(0.0018942,0.0126402)	0.00804549	0.0187921	0.018284	2745	0.173386	(0.0151831,0.3315883)	0.0317215	0.0619794	0.0652635	2539	0.0880929	(0.0112699,0.1649158)	0.0246309	0.0537301	0.0517899	1964	0.06481	(-0.0086634,0.1382834)	0.083808	0.115622	0.121395	2537
NA	NA	QI4683	mz158_0962_rt5_61	HILIC	FALSE	158.096	5.61	TRUE	0.887399	(0.8130047,0.9686001)	0.00749258	0.0145519	0.0154818	2749	-0.0013041	(-0.0066876,0.0040794)	0.634828	0.738295	0.735334	2745	-0.196572	(-0.3573808,-0.0357640)	0.0166016	0.0351139	0.0372562	2539	0.0569757	(-0.0234613,0.1374127)	0.164944	0.27439	0.269396	1964	0.0101087	(-0.0646468,0.0848641)	0.790909	0.827915	0.834589	2537
NA	NA	QI12497	mz172_0605_rt4_67	HILIC	FALSE	172.06	4.67	TRUE	1.12907	(1.0327757,1.2343397)	0.00760692	0.0147592	0.0156954	2749	0.0125434	(0.0073163,0.0177704)	2.65906e-06	1.09049e-05	1.11169e-05	2745	-0.0276899	(-0.1814888,0.1261089)	0.724088	0.791984	0.802926	2539	0.0547997	(-0.0191976,0.1287970)	0.146558	0.249559	0.244661	1964	0.0646532	(-0.0067848,0.1360912)	0.0760732	0.105699	0.111202	2537
SM(d18:1_19:0)	NA	QI6331	mz745_6209_rt7_28	HILIC	FALSE	745.621	7.28	TRUE	0.882919	(0.8057290,0.9675045)	0.00763735	0.0148035	0.0157356	2749	0.0144496	(0.0093393,0.0195600)	3.23204e-08	1.67894e-07	1.76226e-07	2745	-0.0220549	(-0.1741849,0.1300751)	0.776219	0.833515	0.841129	2539	0.102225	(0.0270679,0.1773831)	0.00770496	0.0189991	0.0186009	1964	-0.0846743	(-0.1552921,-0.0140564)	0.0187883	0.0289325	0.0306861	2537
NA	NA	QI13912	mz231_0722_rt2_54	HILIC	FALSE	231.072	2.54	TRUE	1.12978	(1.0327995,1.2358697)	0.00770486	0.0149195	0.0158519	2749	0.0249988	(0.0198102,0.0301874)	7.19181e-21	1.45934e-19	1.51663e-19	2745	0.133522	(-0.0238846,0.2909282)	0.0963647	0.158949	0.164704	2539	0.299305	(0.2213821,0.3772286)	7.5311e-14	6.52026e-13	7.15205e-13	1964	0.310868	(0.2386338,0.3831030)	5.30873e-17	2.85674e-16	3.06964e-16	2537
NA	NA	NA	_0hydroxy_n_arachidonoyl_taurin	AMIDE	TRUE	NA	NA	TRUE	1.17472	(1.0429959,1.3230910)	0.00796178	0.0154017	0.016357	1702	0.0103895	(0.0039990,0.0167800)	0.00145513	0.00403788	0.00398838	1697	0.181109	(-0.0345845,0.3968028)	0.0997646	0.16414	0.169908	1592	0.160388	(0.0667102,0.2540668)	0.000805583	0.00239219	0.00238679	1290	0.0845825	(-0.0076743,0.1768393)	0.0723198	0.101061	0.106148	1590
NA	NA	QI9469	mz104_1072_rt7_92	HILIC	FALSE	104.107	7.92	TRUE	0.888966	(0.8149113,0.9697499)	0.00799855	0.0154575	0.016409	2749	-0.0090732	(-0.0144213,-0.0037250)	0.000890808	0.00257081	0.00255484	2745	-0.233657	(-0.3946404,-0.0726736)	0.00446114	0.010945	0.0117165	2539	-0.114182	(-0.1938786,-0.0344857)	0.00500642	0.0128492	0.0125951	1964	0.145765	(0.0711329,0.2203974)	0.000131329	0.000262928	0.000282348	2537
NA	NA	QI1895	mz446_0535_rt2_2	HILIC	FALSE	446.053	2.2	TRUE	0.890813	(0.8176450,0.9705294)	0.00819244	0.0158165	0.0167828	2749	-0.008812	(-0.0141820,-0.0034419)	0.00130773	0.00365473	0.00361134	2745	-0.0816164	(-0.2426756,0.0794428)	0.320473	0.419826	0.428293	2539	-0.0673686	(-0.1416768,0.0069397)	0.0755555	0.143452	0.139442	1964	-0.0254815	(-0.1002539,0.0492908)	0.504034	0.574522	0.584777	2537
NA	NA	QI456	mz143_1065_rt1_78	HILIC	FALSE	143.107	1.78	TRUE	0.883999	(0.8065715,0.9688598)	0.0083792	0.0161611	0.0171409	2749	-0.0025555	(-0.0075215,0.0024105)	0.313042	0.444789	0.440532	2745	-0.13185	(-0.2772768,0.0135761)	0.0755495	0.129666	0.135085	2539	0.0284535	(-0.0406937,0.0976007)	0.41976	0.552011	0.554021	1964	-0.151286	(-0.2186376,-0.0839348)	1.10373e-05	2.44326e-05	2.64232e-05	2537
N-acetylornithine	HMDB0003357	QI9076	n_acetylornithine	HILIC	TRUE	175.108	8.62	TRUE	1.13021	(1.0317653,1.2380433)	0.00847539	0.0163304	0.017313	2749	-0.0048783	(-0.0100766,0.0003199)	0.0658531	0.119524	0.116873	2745	-0.0750611	(-0.2291143,0.0789920)	0.33945	0.441126	0.450714	2539	-0.0389384	(-0.1138281,0.0359514)	0.307997	0.439081	0.438777	1964	0.0302986	(-0.0412611,0.1018582)	0.406475	0.482225	0.493552	2537
LPC(16:0)	HMDB0010387	QI9455	mz534_2956_rt7_95	HILIC	FALSE	534.296	7.95	TRUE	1.12594	(1.0304196,1.2303147)	0.00872949	0.0168034	0.0178067	2749	0.0062973	(0.0009568,0.0116378)	0.0208451	0.0439353	0.0427383	2745	0.318027	(0.1578599,0.4781941)	0.000101338	0.000366926	0.000380415	2539	0.100307	(0.0220198,0.1785938)	0.0120576	0.0284017	0.0275687	1964	0.624481	(0.5540324,0.6949302)	5.07422e-64	1.19091e-62	1.32299e-62	2537
NA	NA	QI5461	mz661_5276_rt6_12	HILIC	FALSE	661.528	6.12	TRUE	0.889534	(0.8147527,0.9711800)	0.00898388	0.017276	0.0182996	2749	-0.0050671	(-0.0104472,0.0003131)	0.0648939	0.118033	0.115313	2745	-0.26394	(-0.4212623,-0.1066180)	0.00101627	0.00289853	0.0030552	2539	-0.243388	(-0.3200521,-0.1667242)	5.83003e-10	3.73582e-09	3.90666e-09	1964	-0.41715	(-0.4885475,-0.3457523)	1.15414e-29	1.09671e-28	1.2351e-28	2537
NA	NA	QI15464	mz377_1944_rt1_85	HILIC	FALSE	377.194	1.85	TRUE	0.891351	(0.8173722,0.9720266)	0.00927458	0.0177824	0.0188649	2749	0.0072576	(0.0019543,0.0125609)	0.00733156	0.0173324	0.0168215	2745	-0.225757	(-0.3854179,-0.0660960)	0.00560054	0.0132723	0.0141394	2539	0.0481719	(-0.0300725,0.1264163)	0.227417	0.350605	0.344142	1964	-0.0195482	(-0.0938342,0.0547379)	0.605896	0.668338	0.676678	2537
NA	NA	QI2899	mz154_0609_rt3_43	HILIC	FALSE	154.061	3.43	TRUE	0.892412	(0.8189583,0.9724540)	0.00939504	0.0179956	0.0190828	2749	0.0042865	(-0.0010782,0.0096512)	0.117291	0.195619	0.191348	2745	0.0671623	(-0.0881354,0.2224600)	0.396496	0.496704	0.507656	2539	0.0703618	(-0.0047235,0.1454471)	0.0662432	0.128784	0.124826	1964	0.0056476	(-0.0664333,0.0777286)	0.877906	0.903891	0.909622	2537
CAR(16:0)	HMDB0000222	QI6099	c16_carnitine	HILIC	TRUE	400.342	6.87	TRUE	0.887564	(0.8109003,0.9714763)	0.00965843	0.0184819	0.0195901	2749	0.0228801	(0.0177806,0.0279795)	2.41915e-18	3.74008e-17	3.89782e-17	2745	0.114904	(-0.0351310,0.2649386)	0.133286	0.209387	0.214963	2539	0.0993159	(0.0263557,0.1722762)	0.00765647	0.0189034	0.018515	1964	0.159283	(0.0898202,0.2287456)	7.21973e-06	1.63156e-05	1.76674e-05	2537
NA	NA	QI15795	mz271_2265_rt1_76	HILIC	FALSE	271.226	1.76	TRUE	0.885047	(0.8066754,0.9710330)	0.00984202	0.0188148	0.0199343	2749	-0.0002073	(-0.0052407,0.0048262)	0.935651	0.960299	0.959745	2745	-0.107985	(-0.2557862,0.0398169)	0.152083	0.233274	0.238869	2539	-0.0250383	(-0.0962773,0.0462007)	0.49072	0.615533	0.618903	1964	-0.167342	(-0.2356049,-0.0990791)	1.6216e-06	3.83359e-06	4.18233e-06	2537
NA	NA	QI2626	mz302_1383_rt2_92	HILIC	FALSE	302.138	2.92	TRUE	1.12522	(1.0287280,1.2307555)	0.00990418	0.0188965	0.0200319	2749	0.0118482	(0.0064849,0.0172115)	1.53254e-05	5.69731e-05	5.70821e-05	2745	0.257648	(0.0993032,0.4159929)	0.0014369	0.00394793	0.00417108	2539	0.216565	(0.1382691,0.2948611)	6.52883e-08	3.22796e-07	3.35568e-07	1964	0.119395	(0.0458073,0.1929829)	0.00148271	0.00263773	0.00280873	2537
NA	NA	QI14567	mz468_3891_rt2_1	HILIC	FALSE	468.389	2.1	TRUE	0.892024	(0.8177692,0.9730219)	0.00997485	0.0189756	0.0201464	2749	-0.0057957	(-0.0111475,-0.0004440)	0.0338021	0.0670535	0.0654146	2745	-0.0385483	(-0.1984106,0.1213141)	0.636368	0.724092	0.735929	2539	-0.0640957	(-0.1418273,0.0136358)	0.106009	0.190855	0.186474	1964	-0.0399808	(-0.1141281,0.0341665)	0.290461	0.360853	0.372559	2537
NA	NA	QI12117	mz613_5185_rt4_99	HILIC	FALSE	613.519	4.99	TRUE	0.890582	(0.8154057,0.9726888)	0.0100128	0.0190292	0.0201946	2749	0.0037636	(-0.0015088,0.0090361)	0.161717	0.256535	0.252043	2745	-0.166491	(-0.3215489,-0.0114337)	0.0353465	0.0680385	0.0714907	2539	0.0090605	(-0.0665480,0.0846689)	0.814221	0.875816	0.876571	1964	0.42353	(0.3533779,0.4936828)	1.64586e-31	1.73305e-30	1.93456e-30	2537
NA	NA	QI15805	mz429_3723_rt1_76	HILIC	FALSE	429.372	1.76	TRUE	0.888673	(0.8122563,0.9722795)	0.0100892	0.0191557	0.0203201	2749	0.0008	(-0.0045104,0.0061103)	0.767716	0.843016	0.84167	2745	0.0059397	(-0.1518101,0.1636896)	0.941149	0.961383	0.964695	2539	-0.0104663	(-0.0865214,0.0655887)	0.787275	0.856766	0.857867	1964	0.28714	(0.2147565,0.3595237)	1.05789e-14	4.84887e-14	5.19525e-14	2537
NA	NA	QI9684	mz787_6656_rt7_62	HILIC	FALSE	787.666	7.62	TRUE	0.890806	(0.8156433,0.9728948)	0.0101419	0.019237	0.0203976	2749	0.0094424	(0.0040957,0.0147891)	0.000542651	0.0016313	0.0016178	2745	-0.0997369	(-0.2595547,0.0600809)	0.221167	0.311746	0.318747	2539	0.0629365	(-0.0147953,0.1406682)	0.112473	0.198999	0.194555	1964	-0.163657	(-0.2376372,-0.0896769)	1.49513e-05	3.25784e-05	3.50329e-05	2537
5-Oxo-ETE	NA	NA	__oxo_ete	AMIDE	TRUE	NA	NA	TRUE	0.856007	(0.7599106,0.9642560)	0.0104955	0.0198497	0.0210792	1702	0.0025302	(-0.0038837,0.0089441)	0.439204	0.568107	0.562338	1697	-0.0165799	(-0.2332432,0.2000834)	0.880706	0.913142	0.917925	1592	0.0831014	(-0.0114617,0.1776644)	0.0849435	0.158344	0.154189	1290	0.0390169	(-0.0534927,0.1315265)	0.40821	0.4834	0.494403	1590
NA	NA	QI1192	mz107_0857_rt2_01	HILIC	FALSE	107.086	2.01	TRUE	0.892385	(0.8175423,0.9740791)	0.0108466	0.020474	0.0217539	2749	-0.0045174	(-0.0098965,0.0008617)	0.0997273	0.170711	0.166872	2745	-0.149978	(-0.3089761,0.0090209)	0.0644807	0.113059	0.11794	2539	-0.01885	(-0.0977101,0.0600101)	0.639277	0.739936	0.740487	1964	-0.107406	(-0.1811668,-0.0336451)	0.00433407	0.00730976	0.00781768	2537
LPC(20:2)	NA	QI6698	mz548_3694_rt7_84	HILIC	FALSE	548.369	7.84	TRUE	0.892654	(0.8177940,0.9743658)	0.0110516	0.0208408	0.0221341	2749	-0.0144968	(-0.0198454,-0.0091483)	1.15434e-07	5.55223e-07	5.8286e-07	2745	-0.377988	(-0.5380215,-0.2179551)	3.81324e-06	1.90956e-05	2.01778e-05	2539	-0.254916	(-0.3332301,-0.1766025)	2.1516e-10	1.39711e-09	1.46924e-09	1964	0.063275	(-0.0112634,0.1378134)	0.0961181	0.131487	0.137833	2537
NA	NA	QI1530	mz184_1696_rt2_1	HILIC	FALSE	184.17	2.1	TRUE	0.895014	(0.8213023,0.9753417)	0.0114283	0.0215303	0.0228566	2749	0.0018938	(-0.0034327,0.0072203)	0.485763	0.611283	0.60731	2745	-0.145285	(-0.3014565,0.0108868)	0.0682388	0.118687	0.123866	2539	0.0126817	(-0.0626996,0.0880630)	0.741483	0.819335	0.822385	1964	-0.0283639	(-0.1008989,0.0441711)	0.443281	0.517382	0.527961	2537
NA	NA	QI1840	mz267_1237_rt2_16	HILIC	FALSE	267.124	2.16	TRUE	1.11756	(1.0250473,1.2184172)	0.0116985	0.022018	0.0233644	2749	0.0036511	(-0.0016558,0.0089581)	0.177439	0.277409	0.272428	2745	-0.0303019	(-0.1855945,0.1249907)	0.702029	0.772629	0.783432	2539	0.11572	(0.0412377,0.1902030)	0.00234231	0.00640845	0.0063375	1964	0.0046556	(-0.0674926,0.0768039)	0.899319	0.919619	0.924461	2537
NA	NA	QI4596	mz798_5398_rt5_5	HILIC	FALSE	798.54	5.5	TRUE	1.12547	(1.0265365,1.2339470)	0.0118077	0.0222021	0.0235497	2749	-0.0041579	(-0.0094897,0.0011738)	0.126346	0.208225	0.203802	2745	0.251782	(0.0919888,0.4115747)	0.00202505	0.00542613	0.00573898	2539	-0.0648505	(-0.1422316,0.0125307)	0.100421	0.182994	0.17861	1964	-0.123346	(-0.1975770,-0.0491152)	0.00113548	0.00205767	0.00219157	2537
NA	NA	QI727	mz363_2889_rt1_85	HILIC	FALSE	363.289	1.85	TRUE	0.897317	(0.8247092,0.9763163)	0.0118454	0.0222515	0.0235921	2749	-0.0043254	(-0.0096411,0.0009904)	0.110716	0.187055	0.18265	2745	-0.0368393	(-0.1908481,0.1171696)	0.639073	0.725897	0.737867	2539	0.0212533	(-0.0529389,0.0954455)	0.574314	0.687624	0.690911	1964	-0.0938675	(-0.1653393,-0.0223957)	0.0100701	0.016132	0.0171096	2537
NA	NA	QI15800	mz617_4745_rt1_76	HILIC	FALSE	617.475	1.76	TRUE	0.894586	(0.8198642,0.9761173)	0.0123096	0.0231013	0.0244826	2749	0.0009853	(-0.0041717,0.0061423)	0.707961	0.789415	0.788211	2745	-0.139172	(-0.2865324,0.0081885)	0.0641511	0.112823	0.117828	2539	-0.021206	(-0.0931080,0.0506960)	0.563055	0.679508	0.683676	1964	-0.210488	(-0.2787216,-0.1422551)	1.67259e-09	5.06719e-09	5.55207e-09	2537
NA	NA	QI1659	mz191_1066_rt2_1	HILIC	FALSE	191.107	2.1	TRUE	1.12128	(1.0248984,1.2267238)	0.0125503	0.0235077	0.0249268	2749	0.0028753	(-0.0024547,0.0082052)	0.290252	0.419133	0.415391	2745	0.142964	(-0.0149072,0.3008347)	0.0758959	0.130031	0.135367	2539	0.0362112	(-0.0387132,0.1111357)	0.343327	0.473991	0.474765	1964	-0.0567283	(-0.1301120,0.0166554)	0.129682	0.171968	0.178984	2537
NA	NA	QI14420	mz462_3493_rt2_14	HILIC	FALSE	462.349	2.14	TRUE	0.896734	(0.8231046,0.9769498)	0.0126511	0.0236737	0.0250922	2749	-0.0069426	(-0.0122521,-0.0016332)	0.010401	0.0236419	0.0230883	2745	-0.0450095	(-0.2054186,0.1153996)	0.582222	0.674357	0.686097	2539	-0.0229041	(-0.1006923,0.0548840)	0.563699	0.679508	0.683693	1964	0.179278	(0.1050560,0.2534992)	2.2952e-06	5.36097e-06	5.83567e-06	2537
NA	HMDB0004620	QI9190	n_alpha_acetylarginine	HILIC	TRUE	217.129	8.37	TRUE	1.12411	(1.0250569,1.2327369)	0.012926	0.0241649	0.025602	2749	-0.0018205	(-0.0070425,0.0034016)	0.494308	0.619634	0.615845	2745	-0.0779751	(-0.2317340,0.0757837)	0.320111	0.419634	0.428208	2539	0.0089733	(-0.0665965,0.0845432)	0.815884	0.876529	0.876764	1964	0.0896888	(0.0183687,0.1610088)	0.0137314	0.021589	0.022923	2537
LPC(18:2)	HMDB0010386	TF8	c18_2_lpc	HILIC	TRUE	520.34	7.92	TRUE	0.891735	(0.8145113,0.9762807)	0.0131611	0.0245573	0.0260317	2749	-0.0315062	(-0.0365921,-0.0264203)	4.15884e-33	2.70047e-31	2.71081e-31	2745	-0.364222	(-0.5185085,-0.2099347)	3.85862e-06	1.9224e-05	2.03429e-05	2539	-0.344878	(-0.4198306,-0.2699252)	4.21993e-19	5.78903e-18	6.64987e-18	1964	-0.249464	(-0.3207528,-0.1781755)	8.51337e-12	3.08828e-11	3.36313e-11	2537
Lysine	HMDB0000182	QI7443	lysine	HILIC	TRUE	147.113	9.59	TRUE	1.11853	(1.0234338,1.2224686)	0.013477	0.0251227	0.0266199	2749	0.0157266	(0.0103709,0.0210822)	9.46501e-09	5.25295e-08	5.47291e-08	2745	0.481127	(0.3219441,0.6403110)	3.50941e-09	2.76775e-08	3.05e-08	2539	0.21523	(0.1369745,0.2934858)	7.72833e-08	3.78261e-07	3.92994e-07	1964	0.259791	(0.1860797,0.3335030)	6.06495e-12	2.21661e-11	2.40918e-11	2537
LPC(14:0)	HMDB0010379	QI6820	mz506_2643_rt8_09	HILIC	FALSE	506.264	8.09	TRUE	1.11849	(1.0233480,1.2224865)	0.0135576	0.0252022	0.0267073	2749	0.0079261	(0.0025710,0.0132812)	0.00373484	0.00952286	0.00931437	2745	0.356261	(0.1969080,0.5156134)	1.21307e-05	5.29834e-05	5.57546e-05	2539	0.33868	(0.2616328,0.4157282)	1.34709e-17	1.6299e-16	1.83974e-16	1964	0.717216	(0.6484377,0.7859945)	3.89194e-86	1.30716e-84	1.4687e-84	2537
NA	NA	QI649	mz419_3152_rt1_83	HILIC	FALSE	419.315	1.83	TRUE	0.897242	(0.8232356,0.9779014)	0.0135585	0.0252022	0.0267073	2749	0.0003487	(-0.0050286,0.0057260)	0.898827	0.938828	0.93876	2745	-0.104878	(-0.2630355,0.0532799)	0.193611	0.28209	0.28741	2539	0.0129664	(-0.0607874,0.0867203)	0.73029	0.813847	0.81624	1964	-0.114067	(-0.1874430,-0.0406914)	0.00232487	0.00405085	0.00430176	2537
LPE(20:4)	HMDB0011517	QI5834	c20_4_lpe	HILIC	TRUE	502.293	6.39	TRUE	1.11758	(1.0230953,1.2207931)	0.0136412	0.0253318	0.0268333	2749	-0.0126415	(-0.0179508,-0.0073323)	3.17521e-06	1.28593e-05	1.31218e-05	2745	0.0743503	(-0.0842236,0.2329242)	0.357971	0.459979	0.470514	2539	-0.233202	(-0.3094614,-0.1569417)	2.38375e-09	1.42004e-08	1.49271e-08	1964	0.430181	(0.3584966,0.5018651)	3.66456e-31	3.73747e-30	4.20398e-30	2537
NA	NA	QI12888	mz389_0563_rt4_1	HILIC	FALSE	389.056	4.1	TRUE	0.896442	(0.8218232,0.9778359)	0.0136847	0.0253884	0.026882	2749	-0.0077324	(-0.0131078,-0.0023569)	0.00482851	0.0119516	0.0116371	2745	-0.0357969	(-0.1948916,0.1232979)	0.659099	0.742153	0.753106	2539	-0.002002	(-0.0793663,0.0753622)	0.959529	0.974389	0.97346	1964	-0.0222687	(-0.0961643,0.0516268)	0.554622	0.619853	0.630212	2537
Palmitic acid	NA	NA	palmitic_acid	AMIDE	TRUE	NA	NA	TRUE	0.862544	(0.7665915,0.9705061)	0.0139904	0.0259308	0.0274372	1702	0.0191052	(0.0129289,0.0252815)	1.60314e-09	9.49215e-09	1.00389e-08	1697	0.515787	(0.3223101,0.7092646)	1.93074e-07	1.17902e-06	1.31842e-06	1592	0.179236	(0.0994122,0.2590595)	1.14556e-05	4.30801e-05	4.35738e-05	1290	0.318561	(0.2364847,0.4006373)	4.57364e-14	1.94955e-13	2.12252e-13	1590
NA	NA	QI12778	mz267_0585_rt4_27	HILIC	FALSE	267.058	4.27	TRUE	1.11604	(1.0224616,1.2181782)	0.0140056	0.0259343	0.0274372	2749	0.0090338	(0.0039389,0.0141288)	0.000515454	0.00156647	0.00155941	2745	-0.0656647	(-0.2141591,0.0828298)	0.385961	0.488533	0.499069	2539	0.0984794	(0.0297245,0.1672344)	0.00501826	0.0128626	0.0126028	1964	0.180926	(0.1121866,0.2496645)	2.6438e-07	6.61969e-07	7.23513e-07	2537
NA	NA	QI2691	mz468_2956_rt3_03	HILIC	FALSE	468.296	3.03	TRUE	1.14036	(1.0263842,1.2669930)	0.0144981	0.02677	0.0283633	2749	0.002261	(-0.0022291,0.0067510)	0.323539	0.456706	0.451656	2745	0.0502444	(-0.0835304,0.1840192)	0.461499	0.561174	0.573972	2539	0.0432019	(-0.0210409,0.1074446)	0.187374	0.30144	0.296277	1964	0.0178313	(-0.0442497,0.0799123)	0.573333	0.638566	0.648903	2537
NA	NA	QI14711	mz183_1379_rt2_09	HILIC	FALSE	183.138	2.09	TRUE	0.895433	(0.8193264,0.9786100)	0.0148071	0.0272888	0.0289283	2749	-0.0031316	(-0.0085086,0.0022453)	0.253547	0.376049	0.37117	2745	-0.144201	(-0.3052233,0.0168205)	0.0791984	0.134506	0.139865	2539	-0.054034	(-0.1326858,0.0246179)	0.178029	0.29021	0.285563	1964	-0.0771494	(-0.1520266,-0.0022722)	0.0434465	0.0629716	0.0661383	2537
NA	NA	QI9645	mz319_1648_rt7_68	HILIC	FALSE	319.165	7.68	TRUE	1.11855	(1.0220759,1.2241292)	0.0149144	0.0274346	0.0290588	2749	0.0136197	(0.0083802,0.0188592)	3.68548e-07	1.68529e-06	1.74999e-06	2745	0.315217	(0.1592378,0.4711965)	7.61334e-05	0.000286309	0.00029748	2539	0.289562	(0.2146064,0.3645166)	5.44863e-14	4.84654e-13	5.24385e-13	1964	0.144065	(0.0715655,0.2165649)	0.000100109	0.000203775	0.000218503	2537
NA	NA	QI7072	mz152_022_rt8_49	HILIC	FALSE	152.022	8.49	TRUE	0.895469	(0.8193174,0.9786993)	0.014901	0.0274346	0.0290588	2749	-0.0010353	(-0.0063112,0.0042406)	0.70043	0.785062	0.782866	2745	0.0286029	(-0.1259882,0.1831941)	0.716776	0.785751	0.796788	2539	0.0564497	(-0.0196923,0.1325917)	0.146116	0.24915	0.244332	1964	0.0432549	(-0.0285710,0.1150808)	0.237757	0.30153	0.311934	2537
NA	NA	QI9880	mz194_0222_rt7_24	HILIC	FALSE	194.022	7.24	TRUE	0.890972	(0.8117581,0.9779153)	0.0150966	0.0277235	0.0293738	2749	-0.0058296	(-0.0108204,-0.0008389)	0.0220728	0.046135	0.044897	2745	-0.0170631	(-0.1613757,0.1272495)	0.816673	0.865078	0.87201	2539	0.149616	(0.0807466,0.2184844)	2.13553e-05	7.77572e-05	7.87237e-05	1964	0.0248214	(-0.0421777,0.0918206)	0.467623	0.53997	0.551457	2537
NA	NA	QI5153	mz259_2012_rt5_94	HILIC	FALSE	259.201	5.94	TRUE	0.898185	(0.8236508,0.9794644)	0.0151233	0.0277403	0.0293859	2749	-0.0011644	(-0.0065513,0.0042224)	0.671702	0.761627	0.759638	2745	-0.110169	(-0.2705331,0.0501945)	0.178059	0.263571	0.268775	2539	0.0253579	(-0.0524122,0.1031280)	0.522595	0.644278	0.647525	1964	-0.0031696	(-0.0777915,0.0714523)	0.933628	0.94675	0.950868	2537
NA	NA	QI10980	mz360_2928_rt5_98	HILIC	FALSE	360.293	5.98	TRUE	1.1226	(1.0222142,1.2328434)	0.015535	0.0284152	0.030145	2749	0.0028668	(-0.0023097,0.0080433)	0.277603	0.403259	0.399681	2745	0.215285	(0.0638271,0.3667427)	0.00535522	0.012753	0.0135918	2539	-0.0151943	(-0.0904957,0.0601071)	0.692351	0.784584	0.784847	1964	-0.0105382	(-0.0809870,0.0599106)	0.769298	0.810488	0.817771	2537
NA	NA	QI566	mz239_164_rt1_82	HILIC	FALSE	239.164	1.82	TRUE	0.896136	(0.8199340,0.9794206)	0.0155817	0.0284739	0.0301948	2749	-0.0012064	(-0.0063710,0.0039583)	0.646981	0.746317	0.744167	2745	0.0262102	(-0.1250204,0.1774408)	0.733998	0.798787	0.808413	2539	0.118996	(0.0473029,0.1906900)	0.00115267	0.0033216	0.00329926	1964	-0.206841	(-0.2767146,-0.1369674)	7.25344e-09	2.0779e-08	2.3012e-08	2537
NA	NA	QI2792	mz113_0348_rt3_21	HILIC	FALSE	113.035	3.21	TRUE	0.898654	(0.8240732,0.9799841)	0.0156335	0.0285418	0.0302543	2749	0.0094923	(0.0041421,0.0148425)	0.000511293	0.00155625	0.00155009	2745	0.127599	(-0.0238507,0.2790485)	0.0986395	0.162426	0.168191	2539	0.136344	(0.0614718,0.2112162)	0.000363717	0.00111931	0.0011115	1964	0.065654	(-0.0045669,0.1358749)	0.0668647	0.0939095	0.0986461	2537
NA	NA	QI12506	mz228_1077_rt4_66	HILIC	FALSE	228.108	4.66	TRUE	1.11684	(1.0210039,1.2216715)	0.0157756	0.0287204	0.0304471	2749	0.015454	(0.0101661,0.0207418)	1.10983e-08	6.09e-08	6.34062e-08	2745	0.195896	(0.0366881,0.3551042)	0.0159023	0.0338184	0.0358552	2539	0.213901	(0.1378478,0.2899535)	3.93111e-08	2.04754e-07	2.11925e-07	1964	0.312319	(0.2392063,0.3854317)	8.91004e-17	4.74228e-16	5.09044e-16	2537
NA	NA	QI3267	mz185_1285_rt4_04	HILIC	FALSE	185.129	4.04	TRUE	0.899375	(0.8251747,0.9802468)	0.0157742	0.0287204	0.0304471	2749	-0.0017467	(-0.0071333,0.0036398)	0.524926	0.643117	0.639002	2745	-0.0275406	(-0.1846001,0.1295188)	0.73099	0.796849	0.806959	2539	-0.0207426	(-0.0969716,0.0554865)	0.593643	0.703416	0.704421	1964	0.0142258	(-0.0588697,0.0873214)	0.702768	0.754266	0.760581	2537
5,6 dihydrouridine	NA	QI3127	mz247_0923_rt3_79	HILIC	FALSE	247.092	3.79	TRUE	1.11478	(1.0204204,1.2178748)	0.0160437	0.0291813	0.0309229	2749	0.0166824	(0.0116672,0.0216976)	8.20869e-11	5.49503e-10	5.94508e-10	2745	-0.10587	(-0.2519928,0.0402522)	0.155517	0.237048	0.242615	2539	0.194071	(0.1273535,0.2607884)	1.34258e-08	7.28509e-08	7.57976e-08	1964	0.278878	(0.2117979,0.3459580)	5.55556e-16	2.84048e-15	3.05237e-15	2537
NA	NA	QI9920	mz244_0525_rt7_11	HILIC	FALSE	244.053	7.11	TRUE	1.11613	(1.0204551,1.2207821)	0.0162705	0.0295386	0.031276	2749	0.0055456	(0.0002313,0.0108600)	0.0408352	0.0790725	0.0769483	2745	0.2906	(0.1339553,0.4472437)	0.000280489	0.0009137	0.00095767	2539	0.147785	(0.0702221,0.2253472)	0.000191754	0.000618438	0.000617922	1964	0.0867026	(0.0138310,0.1595742)	0.0197219	0.0301556	0.0319562	2537
NA	NA	QI2	mz173_0473_rt1_41	HILIC	FALSE	173.047	1.41	TRUE	0.900772	(0.8271737,0.9809178)	0.0162618	0.0295386	0.031276	2749	0.0007305	(-0.0045242,0.0059851)	0.785195	0.854503	0.853007	2745	0.0436864	(-0.1123800,0.1997528)	0.583123	0.67494	0.686534	2539	0.0565572	(-0.0182157,0.1313301)	0.138128	0.237907	0.232974	1964	-0.0799888	(-0.1524366,-0.0075410)	0.0304802	0.0454636	0.0479787	2537
NA	NA	QI6743	mz586_3085_rt7_96	HILIC	FALSE	586.308	7.96	TRUE	1.1164	(1.0202844,1.2215631)	0.0165225	0.0299403	0.0317179	2749	0.0114443	(0.0061585,0.0167302)	2.25496e-05	8.14965e-05	8.10429e-05	2745	0.270802	(0.1124648,0.4291400)	0.000809122	0.00237733	0.00251688	2539	0.0717052	(-0.0067015,0.1501120)	0.0730388	0.139353	0.13532	1964	0.353849	(0.2814752,0.4262235)	2.08079e-21	1.3787e-20	1.52237e-20	2537
NA	NA	QI9993	mz422_8065_rt7	HILIC	FALSE	422.807	7	TRUE	1.11803	(1.0202620,1.2251628)	0.0168662	0.0305347	0.0323344	2749	0.0151808	(0.0098377,0.0205239)	2.77757e-08	1.45841e-07	1.53194e-07	2745	0.0444357	(-0.1155125,0.2043838)	0.585964	0.677512	0.688838	2539	-0.0277791	(-0.1071121,0.0515539)	0.492339	0.616394	0.619332	1964	0.131532	(0.0575185,0.2055450)	0.000500889	0.000947312	0.00101595	2537
NA	NA	QI1902	mz269_976_rt2_2	HILIC	FALSE	269.976	2.2	TRUE	0.903109	(0.8303088,0.9822926)	0.0174729	0.0315451	0.0334528	2749	-0.0054299	(-0.0107520,-0.0001078)	0.04554	0.0871433	0.0852537	2745	-0.108737	(-0.2630388,0.0455655)	0.167141	0.251227	0.256069	2539	-0.0594311	(-0.1347936,0.0159313)	0.122123	0.21432	0.209981	1964	-0.060128	(-0.1317862,0.0115302)	0.100015	0.136244	0.142566	2537
NA	NA	QI13360	mz194_0482_rt3_29	HILIC	FALSE	194.048	3.29	TRUE	1.11133	(1.0186164,1.2124731)	0.0175496	0.0316437	0.0335548	2749	0.0069644	(0.0018258,0.0121030)	0.00791708	0.0185813	0.0180782	2745	-0.0560225	(-0.2053380,0.0932930)	0.461968	0.561393	0.574057	2539	0.0143587	(-0.0544978,0.0832152)	0.68261	0.778072	0.777492	1964	0.113068	(0.0435928,0.1825438)	0.00143378	0.0025577	0.00272323	2537
NA	NA	QI15390	mz209_1902_rt1_86	HILIC	FALSE	209.19	1.86	TRUE	0.898164	(0.8219416,0.9814540)	0.0176112	0.0317067	0.0336278	2749	0.001752	(-0.0035159,0.0070200)	0.51437	0.635904	0.632778	2745	-0.148581	(-0.3031899,0.0060283)	0.0596194	0.106063	0.110744	2539	0.0745105	(0.0005773,0.1484437)	0.0482396	0.096977	0.0939886	1964	-0.137079	(-0.2087887,-0.0653700)	0.000181911	0.000360125	0.000387608	2537
NA	NA	QI11298	mz298_3465_rt5_76	HILIC	FALSE	298.346	5.76	TRUE	1.11075	(1.0183537,1.2115201)	0.0177675	0.0319585	0.0338811	2749	0.004544	(-0.0008445,0.0099325)	0.0983402	0.16893	0.164935	2745	0.204536	(0.0439244,0.3651474)	0.0125818	0.0274461	0.0291005	2539	-0.0272375	(-0.1053596,0.0508847)	0.494202	0.618018	0.620926	1964	0.0280579	(-0.0466528,0.1027685)	0.461541	0.534214	0.546081	2537
N-Acetyl-D-glucosamine	NA	NA	n_actyl_d_glycosamine	AMIDE	TRUE	NA	NA	TRUE	1.31666	(1.0487252,1.6530414)	0.0177978	0.0319835	0.0338938	502	0.0180073	(0.0054291,0.0305856)	0.00510593	0.0125111	0.0121626	501	0.935291	(0.5547714,1.3158103)	1.85901e-06	9.96605e-06	1.07187e-05	466	0.108282	(-0.0406056,0.2571703)	0.153538	0.259403	0.254242	380	0.0781789	(-0.0882714,0.2446292)	0.3565	0.430007	0.442233	466
NA	NA	QI5622	mz523_0482_rt6_25	HILIC	FALSE	523.048	6.25	TRUE	0.900308	(0.8253826,0.9820351)	0.0178421	0.0320336	0.0339331	2749	0.0006212	(-0.0047135,0.0059558)	0.819418	0.880434	0.877554	2745	-0.204195	(-0.3616673,-0.0467226)	0.0110588	0.0244802	0.02587	2539	0.0694892	(-0.0053212,0.1442996)	0.068656	0.131905	0.127861	1964	-0.0675786	(-0.1408795,0.0057224)	0.0707532	0.0990138	0.103955	2537
Symmetric dimethyl-arginine	HMDB0003334	TF28	sdma	HILIC	TRUE	203.15	9.87	TRUE	0.893182	(0.8134041,0.9807840)	0.0179608	0.032217	0.0341136	2749	-0.006324	(-0.0113186,-0.0013294)	0.0130972	0.0288939	0.028158	2745	-0.50254	(-0.6475635,-0.3575161)	1.34562e-11	1.29766e-10	1.45084e-10	2539	-0.125997	(-0.1938117,-0.0581817)	0.000275676	0.000859227	0.000853822	1964	0.0316289	(-0.0364477,0.0997054)	0.362356	0.43626	0.448333	2537
NA	NA	QI6679	mz714_6498_rt7_8	HILIC	FALSE	714.65	7.8	TRUE	0.899374	(0.8236160,0.9821013)	0.0181647	0.0325527	0.0344553	2749	-0.0022339	(-0.0075353,0.0030674)	0.408723	0.540892	0.534771	2745	-0.081482	(-0.2401385,0.0771745)	0.313997	0.414127	0.42279	2539	0.0464354	(-0.0321797,0.1250506)	0.246841	0.370237	0.366106	1964	0.10042	(0.0266958,0.1741442)	0.0076121	0.0123776	0.0131515	2537
NA	NA	QI10425	mz438_2976_rt6_34	HILIC	FALSE	438.298	6.34	TRUE	1.11218	(1.0182253,1.2148109)	0.0182244	0.0326297	0.0345228	2749	0.014334	(0.0089756,0.0196924)	1.67908e-07	7.95827e-07	8.36042e-07	2745	0.219008	(0.0581196,0.3798967)	0.00765037	0.0176366	0.0186575	2539	0.118557	(0.0396485,0.1974663)	0.00325097	0.00865149	0.00853826	1964	0.0764019	(0.0016873,0.1511166)	0.0450495	0.0651979	0.0684332	2537
PC(33:1)	NA	QI10102	mz746_568_rt6_84	HILIC	FALSE	746.568	6.84	TRUE	0.898794	(0.8225436,0.9821130)	0.0183245	0.0327788	0.0346667	2749	-0.0093381	(-0.0146629,-0.0040133)	0.000593249	0.00176705	0.00174686	2745	-0.0965682	(-0.2546611,0.0615248)	0.231115	0.323661	0.330428	2539	-0.0487317	(-0.1257435,0.0282801)	0.214756	0.335481	0.329369	1964	0.387544	(0.3156945,0.4593943)	1.29672e-25	1.03102e-24	1.15497e-24	2537
NA	NA	QI1893	mz713_0661_rt2_2	HILIC	FALSE	713.066	2.2	TRUE	0.900793	(0.8255476,0.9828971)	0.0188959	0.033739	0.0357006	2749	-0.0080059	(-0.0133672,-0.0026446)	0.00343919	0.00887357	0.00868274	2745	0.0538025	(-0.1073237,0.2149287)	0.512673	0.607844	0.619354	2539	-0.0605415	(-0.1351950,0.0141120)	0.111895	0.198517	0.194023	1964	-0.0339436	(-0.1088153,0.0409282)	0.374094	0.447626	0.459684	2537
NA	NA	QI8855	mz140_068_rt9_19	HILIC	FALSE	140.068	9.19	TRUE	1.1098	(1.0171827,1.2108540)	0.0191224	0.0340498	0.0360809	2749	0.0003176	(-0.0047588,0.0053941)	0.90237	0.940009	0.939041	2745	-0.161802	(-0.3055896,-0.0180142)	0.0274336	0.0543126	0.0574335	2539	-0.0917089	(-0.1579147,-0.0255032)	0.00665278	0.016679	0.0163638	1964	-0.116762	(-0.1834658,-0.0500576)	0.000607769	0.00114169	0.00122236	2537
NA	NA	QI9705	mz637_9614_rt7_6	HILIC	FALSE	637.961	7.6	TRUE	1.11209	(1.0173808,1.2156085)	0.0193143	0.0343601	0.0363951	2749	0.0076151	(0.0022806,0.0129496)	0.00516013	0.0126281	0.0122714	2745	0.409462	(0.2533073,0.5656166)	2.9292e-07	1.73966e-06	1.92682e-06	2539	0.184551	(0.1080750,0.2610263)	2.37413e-06	9.59503e-06	9.75502e-06	1964	0.154736	(0.0821386,0.2273336)	3.02044e-05	6.41638e-05	6.91903e-05	2537
NA	NA	QI7417	mz212_1029_rt9_55	HILIC	FALSE	212.103	9.55	TRUE	1.11662	(1.0179022,1.2249052)	0.0195073	0.0346456	0.0366683	2749	0.0007003	(-0.0044254,0.0058261)	0.788787	0.857932	0.856261	2745	0.0095337	(-0.1393901,0.1584575)	0.900113	0.930196	0.934658	2539	0.0719038	(0.0021364,0.1416713)	0.0433918	0.088603	0.0857078	1964	0.244135	(0.1756670,0.3126027)	3.45456e-12	1.29165e-11	1.40734e-11	2537
NA	NA	QI2008	mz207_9732_rt2_28	HILIC	FALSE	207.973	2.28	TRUE	0.904688	(0.8317529,0.9840182)	0.0195104	0.0346456	0.0366683	2749	-0.0025256	(-0.0079132,0.0028620)	0.358076	0.489496	0.483049	2745	-0.0943557	(-0.2533136,0.0646022)	0.244546	0.337376	0.345837	2539	0.0133802	(-0.0646705,0.0914308)	0.736754	0.818352	0.820977	1964	-0.0726334	(-0.1463033,0.0010364)	0.0533089	0.0761891	0.0800471	2537
NA	NA	QI7387	mz152_0705_rt9_38	HILIC	FALSE	152.071	9.38	TRUE	0.899233	(0.8224813,0.9831469)	0.0196293	0.034825	0.0368435	2749	-0.0026736	(-0.0080281,0.0026809)	0.327627	0.460474	0.455249	2745	-0.204458	(-0.3635327,-0.0453841)	0.0117849	0.0258816	0.0273455	2539	-0.0403862	(-0.1192683,0.0384958)	0.31546	0.445948	0.445684	1964	-0.0240208	(-0.0980099,0.0499682)	0.524434	0.59223	0.602112	2537
NA	NA	QI10440	mz432_2801_rt6_33	HILIC	FALSE	432.28	6.33	TRUE	1.10496	(1.0158841,1.2018383)	0.0199402	0.0353444	0.0373781	2749	0.0046379	(-0.0007460,0.0100218)	0.0913064	0.15952	0.156059	2745	0.14915	(-0.0086020,0.3069020)	0.0638588	0.112576	0.117704	2539	0.0853025	(0.0092262,0.1613787)	0.0279931	0.0605895	0.0583461	1964	0.0686462	(-0.0045973,0.1418897)	0.0662058	0.0931183	0.0978754	2537
Lysine	NA	QI8748	mz185_0688_rt9_59	HILIC	FALSE	185.069	9.59	TRUE	1.11206	(1.0167593,1.2162978)	0.0201498	0.0356511	0.0377217	2749	0.0170927	(0.0117615,0.0224239)	3.76006e-10	2.39366e-09	2.54336e-09	2745	0.476196	(0.3165482,0.6358437)	5.58324e-09	4.23197e-08	4.68209e-08	2539	0.242523	(0.1651641,0.3198812)	9.46148e-10	5.90736e-09	6.19533e-09	1964	0.28795	(0.2141382,0.3617622)	2.84192e-14	1.23849e-13	1.33617e-13	2537
N-Oleoyl taurine	NA	NA	n_oleoyl_taurine	AMIDE	TRUE	NA	NA	TRUE	0.864108	(0.7637921,0.9775992)	0.0203519	0.0359433	0.0380008	1702	0.0145838	(0.0083016,0.0208659)	5.66026e-06	2.22302e-05	2.26095e-05	1697	0.151562	(-0.0601814,0.3633065)	0.160521	0.243153	0.248314	1592	0.0258332	(-0.0660280,0.1176945)	0.581249	0.693795	0.696333	1290	0.0605844	(-0.0301206,0.1512894)	0.190347	0.245723	0.254862	1590
NA	NA	QI1578	mz200_2009_rt2_1	HILIC	FALSE	200.201	2.1	TRUE	0.901666	(0.8261687,0.9840626)	0.0203379	0.0359433	0.0380008	2749	-0.0001534	(-0.0055336,0.0052268)	0.955432	0.973843	0.974006	2745	-0.13245	(-0.2916772,0.0267763)	0.102984	0.168582	0.174562	2539	-0.0489729	(-0.1260669,0.0281211)	0.212984	0.333465	0.327215	1964	-0.0328518	(-0.1067743,0.0410707)	0.383596	0.458433	0.470553	2537
NA	NA	QI14611	mz158_1175_rt2_1	HILIC	FALSE	158.118	2.1	TRUE	0.899786	(0.8229537,0.9837911)	0.0204055	0.0360054	0.0380513	2749	-0.004826	(-0.0102043,0.0005522)	0.0786055	0.140223	0.136796	2745	-0.0233205	(-0.1829337,0.1362928)	0.774519	0.832651	0.840772	2539	-0.0097886	(-0.0866158,0.0670386)	0.80271	0.869241	0.869509	1964	0.0231946	(-0.0509479,0.0973371)	0.539638	0.604842	0.615136	2537
Cystine	HMDB0000192	TF37	cystine	HILIC	TRUE	241.031	9.21	TRUE	1.11896	(1.0174061,1.2306602)	0.0205893	0.0362968	0.0383442	2749	0.0152	(0.0099146,0.0204853)	1.88429e-08	1.00564e-07	1.0555e-07	2745	0.23229	(0.0741735,0.3904056)	0.00400032	0.00993957	0.0106428	2539	0.165342	(0.0885676,0.2421159)	2.51438e-05	9.03692e-05	9.1051e-05	1964	0.174229	(0.1009770,0.2474817)	3.26285e-06	7.54873e-06	8.20864e-06	2537
NA	NA	QI24	mz134_06_rt1_41	HILIC	FALSE	134.06	1.41	TRUE	1.1112	(1.0161868,1.2150943)	0.0207741	0.0365564	0.0386382	2749	-0.0080145	(-0.0132956,-0.0027335)	0.00294831	0.00776123	0.00759044	2745	-0.170058	(-0.3267685,-0.0133480)	0.0334398	0.0648234	0.0682186	2539	0.140831	(0.0663182,0.2153443)	0.000215841	0.000687023	0.00068477	1964	0.104116	(0.0313226,0.1769092)	0.00507528	0.00847911	0.00905218	2537
NA	NA	QI9516	mz252_0452_rt7_8	HILIC	FALSE	252.045	7.8	TRUE	0.901759	(0.8255902,0.9849548)	0.0216387	0.0380435	0.0401942	2749	-0.00248	(-0.0078400,0.0028799)	0.364345	0.495978	0.489663	2745	-0.0290297	(-0.1905440,0.1324846)	0.724537	0.79203	0.802926	2539	0.0027179	(-0.0785315,0.0839674)	0.947699	0.966554	0.966572	1964	0.0151233	(-0.0599619,0.0902085)	0.692909	0.744094	0.750477	2537
NA	NA	QI362	mz619_4902_rt1_75	HILIC	FALSE	619.49	1.75	TRUE	0.901199	(0.8245824,0.9849343)	0.0217426	0.0381917	0.0403349	2749	0.0041018	(-0.0009603,0.0091639)	0.112212	0.188601	0.184532	2745	-0.167944	(-0.3124697,-0.0234188)	0.0227711	0.0460624	0.0488098	2539	0.0083334	(-0.0619835,0.0786503)	0.816234	0.876529	0.876764	1964	-0.153815	(-0.2209220,-0.0867084)	7.28437e-06	1.64426e-05	1.77952e-05	2537
NA	NA	QI15516	mz219_2106_rt1_84	HILIC	FALSE	219.211	1.84	TRUE	0.903995	(0.8290848,0.9856726)	0.022199	0.038898	0.0410857	2749	0.008493	(0.0031569,0.0138292)	0.00182205	0.00501321	0.00493917	2745	-0.171553	(-0.3296434,-0.0134621)	0.0334433	0.0648234	0.0682186	2539	-0.0340716	(-0.1094435,0.0413003)	0.375434	0.505422	0.507898	1964	-0.337827	(-0.4100305,-0.2656229)	9.12912e-20	5.60995e-19	6.17507e-19	2537
2-Aminobenzoic acid	NA	NA	anthranilic_acid	AMIDE	TRUE	NA	NA	TRUE	1.1072	(1.0146631,1.2081818)	0.0222046	0.038898	0.0410857	2749	0.0079525	(0.0025904,0.0133146)	0.00366583	0.0093961	0.00919021	2745	0.0403785	(-0.1162870,0.1970440)	0.613324	0.702797	0.713885	2539	0.052732	(-0.0233737,0.1288378)	0.174349	0.285357	0.280476	1964	-0.0271476	(-0.0998924,0.0455971)	0.464365	0.537163	0.548969	2537
NA	NA	QI7101	mz355_011_rt8_58	HILIC	FALSE	355.011	8.58	TRUE	0.903693	(0.8284103,0.9858175)	0.0224995	0.0393438	0.0415777	2749	-0.0012374	(-0.0066011,0.0041263)	0.651047	0.749551	0.747479	2745	0.0171495	(-0.1431799,0.1774790)	0.833882	0.875395	0.880729	2539	0.0705084	(-0.0073834,0.1484001)	0.0760077	0.14417	0.140096	1964	0.0636557	(-0.0108553,0.1381668)	0.0940141	0.1287	0.134951	2537
NA	NA	QI7299	mz200_0684_rt9	HILIC	FALSE	200.068	9	TRUE	0.906127	(0.8322356,0.9865782)	0.0231281	0.0403706	0.0426843	2749	0.002339	(-0.0029799,0.0076578)	0.388609	0.52352	0.516465	2745	-0.0241243	(-0.1844377,0.1361890)	0.767956	0.826964	0.834912	2539	0.13297	(0.0538150,0.2121241)	0.00100346	0.00293064	0.00291879	1964	0.184406	(0.1102709,0.2585414)	1.14039e-06	2.69925e-06	2.94652e-06	2537
1-Methyluric acid	NA	QI3263	mz183_0514_rt4_02	HILIC	FALSE	183.051	4.02	TRUE	1.1108	(1.0144222,1.2163356)	0.0232574	0.0404874	0.0427578	2749	0.0144989	(0.0092479,0.0197499)	6.69141e-08	3.29997e-07	3.45161e-07	2745	0.142497	(-0.0142043,0.2991982)	0.074681	0.128409	0.133866	2539	0.190879	(0.1131010,0.2686577)	1.60052e-06	6.61956e-06	6.73063e-06	1964	0.134077	(0.0614625,0.2066916)	0.000299629	0.000580773	0.000623611	2537
NA	NA	QI6955	mz496_1364_rt8_27	HILIC	FALSE	496.136	8.27	TRUE	0.90614	(0.8321975,0.9866522)	0.0232462	0.0404874	0.0427578	2749	-0.0061134	(-0.0114878,-0.0007390)	0.0257976	0.052843	0.0516673	2745	-0.101931	(-0.2627450,0.0588830)	0.214018	0.303647	0.310002	2539	0.0090506	(-0.0689075,0.0870088)	0.819915	0.879028	0.878743	1964	-0.0832782	(-0.1579221,-0.0086344)	0.0287806	0.0430935	0.0455032	2537
NA	NA	QI10869	mz388_2537_rt6_05	HILIC	FALSE	388.254	6.05	TRUE	1.10198	(1.0133280,1.1983929)	0.0232461	0.0404874	0.0427578	2749	0.0035613	(-0.0018243,0.0089470)	0.194871	0.301038	0.295396	2745	0.126748	(-0.0312056,0.2847009)	0.115728	0.186302	0.192224	2539	0.0638197	(-0.0123527,0.1399921)	0.100515	0.182994	0.17861	1964	0.0680035	(-0.0053071,0.1413141)	0.0690374	0.0968214	0.101747	2537
Xanthine	HMDB0000292	QI3183	xanthine	HILIC	TRUE	153.041	3.87	TRUE	0.901509	(0.8242503,0.9860094)	0.0233183	0.0405366	0.0428149	2749	0.0208796	(0.0156013,0.0261580)	1.22184e-14	1.23966e-13	1.37962e-13	2745	0.0241675	(-0.1280620,0.1763969)	0.755593	0.816812	0.825225	2539	0.166184	(0.0961714,0.2361962)	3.45517e-06	1.37361e-05	1.39964e-05	1964	0.19541	(0.1251356,0.2656836)	5.44294e-08	1.42896e-07	1.58642e-07	2537
NA	NA	QI3334	mz313_9832_rt4_15	HILIC	FALSE	313.983	4.15	TRUE	0.905392	(0.8308648,0.9866042)	0.023349	0.0405382	0.0428165	2749	-0.0068408	(-0.0121815,-0.0015001)	0.0120764	0.027009	0.0263987	2745	-0.0657897	(-0.2227446,0.0911651)	0.41119	0.512147	0.52413	2539	-0.0846106	(-0.1600339,-0.0091873)	0.0279186	0.0604955	0.0582755	1964	-0.124117	(-0.1968507,-0.0513833)	0.000831245	0.00152761	0.00163288	2537
NA	NA	QI6789	mz530_2645_rt8_06	HILIC	FALSE	530.264	8.06	TRUE	0.904415	(0.8291441,0.9865193)	0.0234454	0.0406693	0.0429383	2749	-0.0061214	(-0.0114813,-0.0007615)	0.0252086	0.0519095	0.0507	2745	-0.283571	(-0.4444683,-0.1226737)	0.000557361	0.00172066	0.00180419	2539	0.0570921	(-0.0230833,0.1372675)	0.162712	0.271437	0.266726	1964	0.132676	(0.0579477,0.2074039)	0.000507102	0.000957204	0.00102565	2537
NA	NA	QI9278	mz543_1166_rt8_23	HILIC	FALSE	543.117	8.23	TRUE	0.905553	(0.8310673,0.9867154)	0.023492	0.0407139	0.0429688	2749	-0.0082881	(-0.0136175,-0.0029588)	0.00231441	0.00624442	0.00612337	2745	-0.182788	(-0.3403842,-0.0251925)	0.0230276	0.046533	0.0492859	2539	-0.0346163	(-0.1124103,0.0431776)	0.382948	0.513425	0.515631	1964	-0.214205	(-0.2870190,-0.1413904)	8.96772e-09	2.54652e-08	2.82011e-08	2537
NA	NA	QI5101	mz296_0641_rt5_92	HILIC	FALSE	296.064	5.92	TRUE	0.91019	(0.8387191,0.9877505)	0.0241106	0.0417488	0.0440441	2749	-0.0058024	(-0.0111786,-0.0004262)	0.0344127	0.0680568	0.0663277	2745	-0.0166477	(-0.1750286,0.1417333)	0.836719	0.877249	0.882246	2539	0.0166279	(-0.0576337,0.0908896)	0.660618	0.76012	0.760294	1964	-0.041811	(-0.1153631,0.0317410)	0.265092	0.332303	0.343398	2537
NA	NA	QI4545	mz181_072_rt5_46	HILIC	FALSE	181.072	5.46	TRUE	1.10922	(1.0134867,1.2140012)	0.0243946	0.0420909	0.0444496	2749	0.0098271	(0.0044946,0.0151596)	0.000307458	0.000966013	0.000960555	2745	0.104992	(-0.0542889,0.2642724)	0.196284	0.285131	0.290776	2539	0.106879	(0.0277165,0.1860405)	0.00816603	0.0199842	0.0195168	1964	0.071814	(-0.0020763,0.1457043)	0.0567894	0.0808668	0.0849176	2537
NA	NA	QI2468	mz552_2819_rt2_71	HILIC	FALSE	552.282	2.71	TRUE	1.10889	(1.0134595,1.2133076)	0.0243758	0.0420909	0.0444496	2749	0.010348	(0.0050106,0.0156853)	0.000146879	0.000478462	0.00047545	2745	0.273545	(0.1160570,0.4310320)	0.000669634	0.00202554	0.00213865	2539	0.126858	(0.0499734,0.2037427)	0.00123283	0.00354735	0.00352167	1964	-0.0249134	(-0.0982444,0.0484177)	0.505349	0.575348	0.585147	2537
NA	NA	QI4032	mz151_0613_rt4_95	HILIC	FALSE	151.061	4.95	TRUE	1.10509	(1.0128544,1.2057314)	0.024628	0.0424185	0.0447612	2749	0.0240283	(0.0191153,0.0289413)	1.90504e-21	4.16968e-20	4.40617e-20	2745	-0.284022	(-0.4263186,-0.1417245)	9.3206e-05	0.000343224	0.00035642	2539	0.20501	(0.1433913,0.2666291)	8.63535e-11	5.84085e-10	6.16074e-10	1964	0.254099	(0.1883985,0.3198002)	4.68046e-14	1.98639e-13	2.16509e-13	2537
NA	NA	QI1374	mz209_1171_rt2_06	HILIC	FALSE	209.117	2.06	TRUE	1.10593	(1.0129708,1.2074219)	0.0245985	0.0424052	0.0447612	2749	0.0052147	(-0.0001356,0.0105650)	0.0560899	0.104358	0.102202	2745	0.117225	(-0.0407870,0.2752362)	0.145865	0.22605	0.231639	2539	0.211952	(0.1356626,0.2882414)	5.71511e-08	2.86196e-07	2.98017e-07	1964	-0.0355166	(-0.1089297,0.0378964)	0.34288	0.416156	0.428301	2537
NA	NA	QI14570	mz328_3206_rt2_1	HILIC	FALSE	328.321	2.1	TRUE	0.905389	(0.8299206,0.9877197)	0.0252066	0.0433767	0.0457548	2749	-0.0027989	(-0.0081822,0.0025844)	0.308068	0.439003	0.435241	2745	-0.0697625	(-0.2297554,0.0902303)	0.39262	0.492799	0.503593	2539	-0.0005976	(-0.0787778,0.0775826)	0.988041	0.993139	0.993584	1964	0.01728	(-0.0569961,0.0915560)	0.64829	0.705513	0.71292	2537
NA	NA	QI12470	mz226_0378_rt4_7	HILIC	FALSE	226.038	4.7	TRUE	0.904651	(0.8286172,0.9876605)	0.0252757	0.0434572	0.0458222	2749	0.0014745	(-0.0038058,0.0067549)	0.58404	0.695422	0.69216	2745	-0.30582	(-0.4608697,-0.1507714)	0.000112633	0.000404068	0.000419521	2539	0.123671	(0.0491837,0.1981577)	0.00114867	0.00331498	0.00329439	1964	0.137241	(0.0651994,0.2092824)	0.000191428	0.000377431	0.000405477	2537
NA	HMDB0034276	QI13602	mz211_144_rt2_88	HILIC	FALSE	211.144	2.88	TRUE	1.10635	(1.0124921,1.2089030)	0.0254538	0.0437249	0.0460868	2749	0.0001035	(-0.0051209,0.0053280)	0.969013	0.9811	0.982024	2745	0.0535612	(-0.0997435,0.2068659)	0.493347	0.592663	0.605703	2539	-0.036568	(-0.1118932,0.0387571)	0.341169	0.472609	0.472951	1964	0.0530374	(-0.0181389,0.1242136)	0.144091	0.189783	0.197351	2537
NA	NA	QI14778	mz155_1065_rt2_08	HILIC	FALSE	155.107	2.08	TRUE	0.904286	(0.8277152,0.9879399)	0.0258306	0.044294	0.0467101	2749	-0.0023495	(-0.0077107,0.0030118)	0.390251	0.525006	0.517687	2745	-0.159862	(-0.3208744,0.0011509)	0.051659	0.0936981	0.0978587	2539	-0.0224183	(-0.1014468,0.0566102)	0.578046	0.691242	0.694236	1964	-0.0920799	(-0.1668265,-0.0173334)	0.0157786	0.0246091	0.0261276	2537
4-Aminohippuric acid	HMDB0001867	QI14096	_4_aminohippuric_acid	HILIC	TRUE	195.077	2.47	TRUE	1.10479	(1.0120301,1.2060432)	0.0259316	0.0444281	0.0468336	2749	0.0165946	(0.0114357,0.0217535)	3.29647e-10	2.11234e-09	2.25102e-09	2745	0.121966	(-0.0289108,0.2728424)	0.113056	0.182766	0.188954	2539	0.147735	(0.0738973,0.2215721)	9.01175e-05	0.000305302	0.000304784	1964	0.157465	(0.0871878,0.2277425)	1.16055e-05	2.55452e-05	2.75535e-05	2537
PC(P-38:6)/PC(O-38:7)	HMDB0011229	QI6034	c38_7_pc_plasmalogen	HILIC	TRUE	790.573	6.64	TRUE	0.90416	(0.8273496,0.9881011)	0.0261329	0.0447336	0.0471378	2749	0.0013998	(-0.0039249,0.0067244)	0.60626	0.713161	0.710275	2745	-0.0583787	(-0.2172734,0.1005159)	0.471317	0.569557	0.581642	2539	-0.066023	(-0.1435039,0.0114580)	0.0948508	0.174805	0.170233	1964	-0.190581	(-0.2639836,-0.1171794)	3.81768e-07	9.44961e-07	1.03489e-06	2537
NA	NA	QI12393	mz257_1494_rt4_76	HILIC	FALSE	257.149	4.76	TRUE	0.901573	(0.8227523,0.9879456)	0.0264336	0.0452087	0.0476203	2749	0.0043551	(-0.0007322,0.0094425)	0.0933417	0.16177	0.157844	2745	-0.241087	(-0.3873170,-0.0948577)	0.00124106	0.00347854	0.00368464	2539	-0.202954	(-0.2713223,-0.1345851)	6.78717e-09	3.83229e-08	4.02182e-08	1964	-0.265885	(-0.3332517,-0.1985176)	1.43334e-14	6.41873e-14	6.85137e-14	2537
NA	NA	QI11522	mz710_5106_rt5_59	HILIC	FALSE	710.511	5.59	TRUE	0.907244	(0.8322343,0.9890136)	0.0270451	0.0461734	0.0486608	2749	0.0015325	(-0.0038258,0.0068907)	0.57498	0.689268	0.686529	2745	0.0362116	(-0.1217641,0.1941873)	0.653122	0.737555	0.748065	2539	0.114525	(0.0372893,0.1917604)	0.00367806	0.00973487	0.00958971	1964	-0.167134	(-0.2402514,-0.0940166)	7.71313e-06	1.73301e-05	1.87468e-05	2537
NA	NA	QI11545	mz746_5098_rt5_56	HILIC	FALSE	746.51	5.56	TRUE	0.906297	(0.8302864,0.9892659)	0.027705	0.047176	0.0497234	2749	0.015933	(0.0106642,0.0212019)	3.41836e-09	1.98183e-08	2.09484e-08	2745	0.121967	(-0.0356950,0.2796291)	0.129404	0.203947	0.209442	2539	0.231366	(0.1552302,0.3075018)	2.98852e-09	1.76413e-08	1.84721e-08	1964	-0.379245	(-0.4510236,-0.3074665)	1.15748e-24	8.8077e-24	9.76368e-24	2537
NA	NA	QI1376	mz352_3205_rt2_07	HILIC	FALSE	352.32	2.07	TRUE	0.905542	(0.8289903,0.9891635)	0.0276836	0.047176	0.0497234	2749	0.0023523	(-0.0030380,0.0077426)	0.392242	0.526688	0.519848	2745	-0.149245	(-0.3092706,0.0107808)	0.0675475	0.1178	0.123079	2539	-0.0093894	(-0.0882098,0.0694311)	0.815302	0.876495	0.876764	1964	-0.0501929	(-0.1244928,0.0241069)	0.185397	0.23981	0.248932	2537
NA	NA	QI900	mz369_2265_rt1_9	HILIC	FALSE	369.226	1.9	TRUE	1.10526	(1.0110069,1.2083000)	0.0277593	0.0472272	0.0497585	2749	0.0027087	(-0.0026838,0.0081013)	0.324738	0.457404	0.452111	2745	0.201251	(0.0412071,0.3612959)	0.0137373	0.0296348	0.0314183	2539	0.0974795	(0.0189854,0.1759737)	0.0149588	0.0344441	0.0333607	1964	0.024927	(-0.0497295,0.0995835)	0.512705	0.581096	0.590628	2537
NA	NA	QI3819	mz233_0631_rt4_78	HILIC	FALSE	233.063	4.78	TRUE	1.10545	(1.0109660,1.2087730)	0.0278634	0.0473629	0.0498828	2749	0.0156102	(0.0103307,0.0208896)	7.48955e-09	4.22888e-08	4.43802e-08	2745	0.267937	(0.1110451,0.4248288)	0.00082353	0.00241602	0.00255615	2539	0.239747	(0.1638772,0.3156171)	6.98501e-10	4.41779e-09	4.59473e-09	1964	0.280743	(0.2084485,0.3530379)	3.70382e-14	1.58572e-13	1.72444e-13	2537
Odds ratio (95% CI) for prevalent diabetes for every 1 SD increase in LC-MS peak measurement were calculated from logistic regression models and beta effects (95% CI) per 1 SD increased in peak measurement for the listed continuous clinical traits were determined using linear regression models. All models were adjusted for age, gender, and batch. FDR calculated based on the 1,943 LC-MS peasks tha…

## Sheet: Tbl3
Supplemental Table 3. LC-MS compounds associated with prevalent diabetes after adjusting for diabetes medication use.
RefMet Name	HMDB ID	Study Compound Name	Compound ID	LC-MS Method	Targeted Method	M/Z	RT	Primary Feature/Ion	Effect Size (OR)	95% CI	P	FDR q (1434 primary features)	N
1-Methyl nicotinamide	HMDB0000699	_1_methylnicotinamide	QI7065	HILIC	TRUE	137.071	8.47	TRUE	0.784193	(0.6756911,0.9101192)	0.00137674	0.0119651	2103
2-Aminooctanoic acid	HMDB0000991	_2_aminooctanoate	QI6031	HILIC	TRUE	160.133	6.63	TRUE	0.804598	(0.7024613,0.9215853)	0.00169554	0.0143024	2103
NA	HMDB0003681	_4_acetamidobutanoate	QI2968	HILIC	TRUE	146.081	3.57	TRUE	1.2253	(1.0589465,1.4177944)	0.00634699	0.0376098	2103
Alanine	HMDB0000161	alanine	QI6746	HILIC	TRUE	90.0551	7.98	TRUE	1.54592	(1.3246965,1.8040880)	3.22991e-08	1.32334e-06	2103
Arginine	HMDB0000517	arginine	QI8815	HILIC	TRUE	175.119	9.36	TRUE	0.824718	(0.7151220,0.9511094)	0.00807349	0.043361	2103
Asparagine	HMDB0000168	asparagine	QI6807	HILIC	TRUE	133.061	8.08	TRUE	0.643806	(0.5526830,0.7499517)	1.55458e-08	6.92961e-07	2103
Bilirubin	HMDB0000054	bilirubin	QI15751	HILIC	TRUE	585.27	1.78	TRUE	0.787527	(0.6925704,0.8955032)	0.000268907	0.00335315	2103
3-Dehydroxycarnitine	HMDB0001161	butyrobetaine	QI7296	HILIC	TRUE	146.117	8.98	TRUE	0.767501	(0.6614519,0.8905531)	0.000487121	0.0053323	2103
CAR(14:2)	HMDB0013331	c14_2_carnitine	QI9968	HILIC	TRUE	368.279	7.04	TRUE	0.795476	(0.6815056,0.9285057)	0.00372976	0.0252287	2103
CAR(18:2)	HMDB0006469	c18_2_carnitine	QI6092	HILIC	TRUE	424.342	6.84	TRUE	0.816258	(0.7026233,0.9482697)	0.00794437	0.0429895	2103
LPC(18:2)	HMDB0010386	c18_2_lpc	TF8	HILIC	TRUE	520.34	7.92	TRUE	0.809896	(0.6969565,0.9411367)	0.0059287	0.0355722	2103
LPC(24:0)	HMDB0010405	c24_0_lpc	QI9712	HILIC	TRUE	608.464	7.58	TRUE	0.633785	(0.5508794,0.7291674)	1.82132e-10	1.18717e-08	2103
PE(34:2)	HMDB0008928	c34_2_pe	QI11421	HILIC	TRUE	716.522	5.68	TRUE	1.32162	(1.1289268,1.5472020)	0.000524003	0.00564978	2103
PC(P-34:2)/PC(O-34:3)	HMDB0011211	c34_3_pc_plasmalogen	QI10124	HILIC	TRUE	742.574	6.75	TRUE	0.635833	(0.5458673,0.7406261)	5.97537e-09	2.85623e-07	2103
PE(O-34:3)	HMDB0011343	c34_3_pe_plasmalogen	QI4722	HILIC	TRUE	700.527	5.63	TRUE	0.809349	(0.7015637,0.9336930)	0.00372161	0.0252287	2103
PC(34:4)	HMDB0007883	c34_4_pc	QI6074	HILIC	TRUE	754.537	6.77	TRUE	1.26377	(1.0838882,1.4735012)	0.00280591	0.0209566	2103
PE(36:2)	HMDB0008994	c36_2_pe	QI4736	HILIC	TRUE	744.553	5.65	TRUE	1.37841	(1.1763995,1.6151001)	7.20937e-05	0.0011616	2103
PE(P-36:2)/PE(O-36:3)	HMDB0011441	c36_3_pe_plasmalogen	QI4677	HILIC	TRUE	728.558	5.6	TRUE	0.765111	(0.6638198,0.8818579)	0.00021975	0.00289102	2103
PE(36:4)	HMDB0008937	c36_4_pe	QI11511	HILIC	TRUE	740.522	5.61	TRUE	1.36074	(1.1626142,1.5926178)	0.000124705	0.00182476	2103
PE(38:4)	HMDB0009003	c38_4_pe	QI4663	HILIC	TRUE	768.552	5.58	TRUE	1.40185	(1.1936311,1.6463815)	3.82966e-05	0.000722596	2103
PE(38:6)	HMDB0009102	c38_6_pe	QI4671	HILIC	TRUE	764.521	5.59	TRUE	1.34518	(1.1447562,1.5806972)	0.000315407	0.00380079	2103
CAR(3:0)	HMDB0000824	c3_carnitine	QI7088	HILIC	TRUE	218.139	8.54	TRUE	1.25886	(1.0746508,1.4746396)	0.00434615	0.0282008	2103
CAR(4:0)	HMDB0002013	c4_carnitine	QI6911	HILIC	TRUE	232.154	8.22	TRUE	1.24798	(1.0641661,1.4635548)	0.00643095	0.037795	2103
CAR(4:0(OH))	HMDB0013127	c4_oh_carnitine	QI7316	HILIC	TRUE	248.149	9.09	TRUE	1.23042	(1.0534887,1.4370679)	0.00884987	0.0459808	2103
CAR(5:1)	HMDB0002366	c5_1_carnitine	QI6783	HILIC	TRUE	244.154	8.05	TRUE	1.32796	(1.1287820,1.5622841)	0.000623873	0.00648285	2103
CAR(5:0)	HMDB0000688	c5_carnitine	QI9447	HILIC	TRUE	246.17	7.98	TRUE	1.38542	(1.1907706,1.6118941)	2.4408e-05	0.000507262	2103
Choline	HMDB0000097	choline	QI9116	HILIC	TRUE	104.107	8.51	TRUE	1.3509	(1.1532701,1.5823958)	0.000193759	0.00262123	2103
Citrulline	HMDB0000904	citrulline	QI9105	HILIC	TRUE	176.103	8.54	TRUE	0.761366	(0.6388281,0.9074088)	0.00232533	0.0178317	2103
DMGV	HMDB0240212	dmgv	TF16	HILIC	TRUE	202.119	8.05	TRUE	1.52673	(1.2890946,1.8081714)	9.49902e-07	3.32234e-05	2103
Glutamic acid	HMDB0000148	glutamate	QI6640	HILIC	TRUE	148.06	7.77	TRUE	1.32312	(1.1417848,1.5332654)	0.000196874	0.00263018	2103
Glutamine	HMDB0000641	glutamine	QI6900	HILIC	TRUE	147.076	8.21	TRUE	0.665386	(0.5770636,0.7672272)	2.06345e-08	8.7029e-07	2103
Glycine	HMDB0000123	glycine	QI9373	HILIC	TRUE	76.0393	8.09	TRUE	0.551296	(0.4690882,0.6479110)	4.91607e-13	4.69976e-11	2103
Histidine	HMDB0000177	histidine	QI8769	HILIC	TRUE	156.077	9.57	TRUE	0.768063	(0.6634296,0.8891982)	0.000413005	0.00466338	2103
Isoleucine	HMDB0000172	isoleucine	TF22	HILIC	TRUE	132.102	7.29	TRUE	1.49734	(1.2604584,1.7787485)	4.34138e-06	0.000113192	2103
Leucine	HMDB0000687	leucine	TF24	HILIC	TRUE	132.102	7.16	TRUE	1.38361	(1.1626580,1.6465545)	0.0002545	0.00322831	2103
NA	HMDB0012252	linoleoyl_ethanolamide	QI14667	HILIC	TRUE	324.289	2.1	TRUE	0.813833	(0.7000147,0.9461587)	0.00736257	0.0412419	2103
Methionine	HMDB0000696	methionine	TF35	HILIC	TRUE	150.058	7.23	TRUE	0.792957	(0.6774581,0.9281465)	0.00387279	0.0258306	2103
NA	NA	mz106_0865_rt8_15	QI9330	HILIC	FALSE	106.087	8.15	TRUE	1.24839	(1.0681073,1.4590903)	0.00530388	0.0330685	2103
NA	NA	mz110_009_rt8_82	QI8965	HILIC	FALSE	110.009	8.82	TRUE	0.825579	(0.7164581,0.9513206)	0.00805139	0.043361	2103
NA	NA	mz112_062_rt5_12	QI12018	HILIC	FALSE	112.062	5.12	TRUE	0.818735	(0.7069492,0.9481961)	0.00758143	0.0418145	2103
NA	NA	mz116_071_rt5_33	QI11802	HILIC	FALSE	116.071	5.33	TRUE	1.25295	(1.0874416,1.4436529)	0.0018106	0.0150495	2103
NA	NA	mz120_0659_rt6_29	QI5684	HILIC	FALSE	120.066	6.29	TRUE	1.22072	(1.0558790,1.4112918)	0.00704738	0.0401029	2103
NA	NA	mz125_0348_rt4_36	QI12731	HILIC	FALSE	125.035	4.36	TRUE	1.24042	(1.0554613,1.4577803)	0.00891835	0.0459982	2103
NA	NA	mz129_066_rt8_82	QI7228	HILIC	FALSE	129.066	8.82	TRUE	0.714643	(0.5859162,0.8716502)	0.000914509	0.00846068	2103
NA	NA	mz131_0492_rt2_74	QI2479	HILIC	FALSE	131.049	2.74	TRUE	0.826885	(0.7176558,0.9527383)	0.00854483	0.0448838	2103
NA	NA	mz143_0814_rt9_71	QI8712	HILIC	FALSE	143.081	9.71	TRUE	0.7497	(0.6424015,0.8749196)	0.000256644	0.00322831	2103
NA	NA	mz146_0632_rt4_17	QI3344	HILIC	FALSE	146.063	4.17	TRUE	1.25417	(1.0984471,1.4319748)	0.000813708	0.00777905	2103
Alanine	NA	mz149_9927_rt7_99	QI6748	HILIC	FALSE	149.993	7.99	TRUE	1.3529	(1.1605632,1.5771223)	0.000111937	0.00165482	2103
NA	NA	mz151_951_rt8_1	QI9368	HILIC	FALSE	151.951	8.1	TRUE	0.648659	(0.5637618,0.7463420)	1.46813e-09	8.42119e-08	2103
Arginine	HMDB0000517	mz158_0923_rt9_37	QI8810	HILIC	FALSE	158.092	9.37	TRUE	0.81308	(0.7079964,0.9337612)	0.00338324	0.0237822	2103
NA	NA	mz160_0968_rt8_62	QI7122	HILIC	FALSE	160.097	8.62	TRUE	1.22969	(1.0534046,1.4354819)	0.00881964	0.0459808	2103
NA	NA	mz161_1324_rt1_83	QI15545	HILIC	FALSE	161.132	1.83	TRUE	0.818391	(0.7058930,0.9488166)	0.0078996	0.0429504	2103
NA	NA	mz162_0547_rt4_2	QI3368	HILIC	FALSE	162.055	4.2	TRUE	1.26297	(1.0832260,1.4725323)	0.00287693	0.0213757	2103
NA	NA	mz162_0759_rt4_93	QI4001	HILIC	FALSE	162.076	4.93	TRUE	2.49398	(2.0969046,2.9662363)	0	0	2103
NA	NA	mz162_0759_rt7_69	QI6556	HILIC	FALSE	162.076	7.69	TRUE	1.84507	(1.5569756,2.1864710)	1.53455e-12	1.37534e-10	2103
Hexoses	NA	mz163_06_rt4_93	QI12184	HILIC	FALSE	163.06	4.93	TRUE	4.36763	(3.4772223,5.4860546)	0	0	2103
NA	NA	mz168_0056_rt8_17	QI9315	HILIC	FALSE	168.006	8.17	TRUE	0.712917	(0.6223184,0.8167055)	1.06184e-06	3.52139e-05	2103
NA	NA	mz170_0925_rt6	QI10969	HILIC	FALSE	170.093	6	TRUE	1.64105	(1.3940638,1.9317891)	2.64912e-09	1.46109e-07	2103
NA	NA	mz173_0669_rt4_29	QI12768	HILIC	FALSE	173.067	4.29	TRUE	1.25759	(1.0787154,1.4661363)	0.00341274	0.0238725	2103
Serine	HMDB0000187	mz181_9615_rt7_82	QI6688	HILIC	FALSE	181.962	7.82	TRUE	0.733681	(0.6361166,0.8462085)	2.10295e-05	0.000443475	2103
Amino uric acid	NA	mz184_0465_rt2_67	QI2435	HILIC	FALSE	184.047	2.67	TRUE	1.24155	(1.0631058,1.4499481)	0.00627728	0.0373511	2103
Hydroxyuric acid	HMDB0030097	mz185_0305_rt2_51	QI2242	HILIC	FALSE	185.03	2.51	TRUE	1.23749	(1.0584950,1.4467467)	0.00751488	0.0416466	2103
N-AcetylGlucosamine	HMDB0000212*	mz186_0761_rt5_58	QI4667	HILIC	FALSE	186.076	5.58	TRUE	1.30078	(1.1154667,1.5168789)	0.000798022	0.00773808	2103
NA	NA	mz186_2216_rt4_66	QI3684	HILIC	FALSE	186.222	4.66	TRUE	0.778511	(0.6797340,0.8916428)	0.000298396	0.00368559	2103
NA	NA	mz191_0402_rt8_21	QI6902	HILIC	FALSE	191.04	8.21	TRUE	0.760034	(0.6622279,0.8722856)	9.4592e-05	0.0014744	2103
NA	NA	mz191_055_rt3_08	QI2727	HILIC	FALSE	191.055	3.08	TRUE	1.5635	(1.3050631,1.8731133)	1.2455e-06	3.8001e-05	2103
NA	NA	mz192_9986_rt8_08	QI9385	HILIC	FALSE	192.999	8.08	TRUE	0.738441	(0.6449562,0.8454752)	1.13091e-05	0.000270287	2103
NA	NA	mz193_9983_rt7_78	QI9541	HILIC	FALSE	193.998	7.78	TRUE	1.36857	(1.1618703,1.6120322)	0.000172708	0.00238138	2103
NA	NA	mz195_9773_rt7_78	QI6650	HILIC	FALSE	195.977	7.78	TRUE	0.718287	(0.6184403,0.8342539)	1.47044e-05	0.000340099	2103
NA	NA	mz197_0809_rt2_86	QI13618	HILIC	FALSE	197.081	2.86	TRUE	1.27879	(1.0931366,1.4959692)	0.0021217	0.0169973	2103
NA	NA	mz198_0432_rt4_69	QI12489	HILIC	FALSE	198.043	4.69	TRUE	1.466	(1.1829369,1.8167995)	0.000474469	0.00523376	2103
Hexoses	NA	mz198_0973_rt4_92	QI12196	HILIC	FALSE	198.097	4.92	TRUE	6.42765	(4.8689200,8.4853882)	0	0	2103
NA	NA	mz198_1238_rt10_55	QI7633	HILIC	FALSE	198.124	10.55	TRUE	1.21755	(1.0551584,1.4049409)	0.00703735	0.0401029	2103
NA	NA	mz199_0462_rt2_07	QI14818	HILIC	FALSE	199.046	2.07	TRUE	1.26981	(1.0850481,1.4860236)	0.00290709	0.0214885	2103
NA	NA	mz200_0406_rt9_57	QI8768	HILIC	FALSE	200.041	9.57	TRUE	0.787089	(0.6820169,0.9083492)	0.00105723	0.00965648	2103
NA	NA	mz203_0526_rt4_95	QI4027	HILIC	FALSE	203.053	4.95	TRUE	3.11094	(2.5686154,3.7677765)	0	0	2103
NA	NA	mz203_0765_rt7_62	QI6509	HILIC	FALSE	203.077	7.62	TRUE	1.23995	(1.0593793,1.4512888)	0.00739941	0.041287	2103
NA	NA	mz204_0865_rt4_89	QI3948	HILIC	FALSE	204.087	4.89	TRUE	2.8197	(2.3523017,3.3799699)	0	0	2103
N-AcetylGlucosamine	HMDB0000212*	mz204_0867_rt5_62	QI4708	HILIC	FALSE	204.087	5.62	TRUE	1.32444	(1.1392929,1.5396830)	0.000254871	0.00322831	2103
NA	NA	mz205_0682_rt5_48	QI11630	HILIC	FALSE	205.068	5.48	TRUE	1.50464	(1.3099511,1.7282572)	7.51534e-09	3.47645e-07	2103
NA	NA	mz205_9981_rt7_87	QI9487	HILIC	FALSE	205.998	7.87	TRUE	0.621129	(0.5402246,0.7141493)	2.25868e-11	1.70471e-09	2103
NA	NA	mz207_0142_rt8_21	QI9295	HILIC	FALSE	207.014	8.21	TRUE	0.727137	(0.6395091,0.8267717)	1.15404e-06	3.59759e-05	2103
NA	NA	mz220_0602_rt5_12	QI4175	HILIC	FALSE	220.06	5.12	TRUE	1.28837	(1.1050858,1.5020472)	0.00121124	0.0107883	2103
NA	NA	mz221_0453_rt6_18	QI10664	HILIC	FALSE	221.045	6.18	TRUE	1.27479	(1.0972162,1.4810954)	0.00151291	0.0129911	2103
NA	NA	mz223_0267_rt2_77	QI2509	HILIC	FALSE	223.027	2.77	TRUE	1.30836	(1.0757493,1.5912646)	0.00712305	0.0402596	2103
Glutamic acid	HMDB0000148	mz223_972_rt7_79	QI9536	HILIC	FALSE	223.972	7.79	TRUE	1.35525	(1.1669480,1.5739416)	6.8118e-05	0.00111079	2103
NA	NA	mz224_1129_rt5_97	QI10992	HILIC	FALSE	224.113	5.97	TRUE	1.23552	(1.0605998,1.4392784)	0.0066204	0.0384358	2103
NA	NA	mz228_1077_rt4_66	QI12506	HILIC	FALSE	228.108	4.66	TRUE	1.28882	(1.1090386,1.4977348)	0.000932349	0.00857044	2103
NA	NA	mz231_0722_rt2_54	QI13912	HILIC	FALSE	231.072	2.54	TRUE	1.23408	(1.0727583,1.4196525)	0.00325487	0.0231064	2103
NA	NA	mz231_0723_rt2_16	QI1839	HILIC	FALSE	231.072	2.16	TRUE	1.20927	(1.0526339,1.3892244)	0.00725978	0.0408256	2103
NA	NA	mz233_0631_rt4_78	QI3819	HILIC	FALSE	233.063	4.78	TRUE	1.2643	(1.0858987,1.4720104)	0.00251276	0.0188654	2103
NA	NA	mz233_063_rt5_31	QI4378	HILIC	FALSE	233.063	5.31	TRUE	1.55551	(1.3276058,1.8225488)	4.61127e-08	1.78718e-06	2103
NA	NA	mz238_1072_rt3_52	QI2940	HILIC	FALSE	238.107	3.52	TRUE	1.77742	(1.5090100,2.0935820)	5.74163e-12	4.57417e-10	2103
NA	NA	mz239_2003_rt1_81	QI536	HILIC	FALSE	239.2	1.81	TRUE	0.826708	(0.7223354,0.9461605)	0.00571538	0.0347282	2103
NA	NA	mz241_093_rt3_99	QI12942	HILIC	FALSE	241.093	3.99	TRUE	1.31265	(1.1315664,1.5227162)	0.000328258	0.00385838	2103
NA	NA	mz244_0789_rt5_49	QI11620	HILIC	FALSE	244.079	5.49	TRUE	1.90533	(1.6178607,2.2438781)	1.11022e-14	1.13718e-12	2103
NA	NA	mz244_0791_rt6_34	QI5762	HILIC	FALSE	244.079	6.34	TRUE	1.44139	(1.2442446,1.6697619)	1.10409e-06	3.52139e-05	2103
NA	NA	mz246_0946_rt5_96	QI5169	HILIC	FALSE	246.095	5.96	TRUE	1.29523	(1.1134186,1.5067181)	0.000801835	0.00773808	2103
NA	NA	mz257_0742_rt5_27	QI4319	HILIC	FALSE	257.074	5.27	TRUE	1.45463	(1.2428567,1.7024898)	3.03776e-06	8.21915e-05	2103
NA	NA	mz260_0795_rt4_45	QI3529	HILIC	FALSE	260.079	4.45	TRUE	0.368963	(0.2981296,0.4566269)	0	0	2103
NA	NA	mz262_1646_rt8_93	QI8919	HILIC	FALSE	262.165	8.93	TRUE	1.34282	(1.1497275,1.5683415)	0.000198089	0.00263018	2103
NA	NA	mz263_0735_rt5_24	QI4288	HILIC	FALSE	263.074	5.24	TRUE	1.72258	(1.4627206,2.0286005)	7.11859e-11	4.93775e-09	2103
NA	NA	mz265_216_rt1_82	QI598	HILIC	FALSE	265.216	1.82	TRUE	0.831382	(0.7234442,0.9554233)	0.00925057	0.0472075	2103
NA	NA	mz269_2109_rt1_84	QI676	HILIC	FALSE	269.211	1.84	TRUE	0.799679	(0.6859651,0.9322441)	0.00428358	0.0279364	2103
NA	NA	mz271_165_rt4_69	QI3704	HILIC	FALSE	271.165	4.69	TRUE	1.35409	(1.1616479,1.5784224)	0.000106287	0.00158766	2103
NA	NA	mz276_1187_rt8_64	QI7136	HILIC	FALSE	276.119	8.64	TRUE	0.683698	(0.5922678,0.7892425)	2.08788e-07	7.67697e-06	2103
NA	NA	mz282_2788_rt4_97	QI12147	HILIC	FALSE	282.279	4.97	TRUE	1.33411	(1.1323231,1.5718592)	0.000570666	0.00608954	2103
NA	NA	mz283_1075_rt2_02	QI1234	HILIC	FALSE	283.108	2.02	TRUE	0.728636	(0.6326543,0.8391801)	1.11897e-05	0.000270287	2103
CAR(8:2)	NA	mz284_1853_rt7_7	QI6558	HILIC	FALSE	284.185	7.7	TRUE	1.27787	(1.0859064,1.5037640)	0.00315418	0.0228439	2103
NA	NA	mz285_0053_rt6_44	QI10309	HILIC	FALSE	285.005	6.44	TRUE	0.751435	(0.6528504,0.8649066)	6.81654e-05	0.00111079	2103
CAR(8:1)	HMDB0013324	mz286_2009_rt7_62	QI9694	HILIC	FALSE	286.201	7.62	TRUE	1.32445	(1.1319381,1.5497118)	0.00045417	0.00504868	2103
NA	NA	mz292_1976_rt9_33	QI7372	HILIC	FALSE	292.198	9.33	TRUE	0.827181	(0.7161623,0.9554103)	0.00987115	0.049256	2103
Biliverdin	HMDB0001008	mz299_1387_rt2_09	QI14719	HILIC	FALSE	299.139	2.09	TRUE	0.756375	(0.6485491,0.8821268)	0.000373308	0.0042486	2103
NA	NA	mz299_1388_rt2_52	QI13939	HILIC	FALSE	299.139	2.52	TRUE	0.76718	(0.6563370,0.8967422)	0.000872059	0.00817342	2103
Biliverdin	HMDB0001008	mz301_1179_rt2_1	QI14569	HILIC	FALSE	301.118	2.1	TRUE	0.811806	(0.6955253,0.9475269)	0.00820986	0.0439289	2103
NA	NA	mz301_1391_rt5_14	QI11989	HILIC	FALSE	301.139	5.14	TRUE	1.46982	(1.2560947,1.7199149)	1.55563e-06	4.64744e-05	2103
CAR(8:0(OH))	NA	mz304_2114_rt7_98	QI9448	HILIC	FALSE	304.211	7.98	TRUE	0.725213	(0.6220377,0.8455016)	4.07241e-05	0.00075842	2103
NA	NA	mz304_23_rt6_13	QI5469	HILIC	FALSE	304.23	6.13	TRUE	1.42213	(1.1981703,1.6879520)	5.62897e-05	0.000960946	2103
NA	NA	mz306_0748_rt7_63	QI9672	HILIC	FALSE	306.075	7.63	TRUE	0.660435	(0.5667558,0.7695994)	1.06417e-07	4.01584e-06	2103
NA	NA	mz310_2008_rt7_53	QI9734	HILIC	FALSE	310.201	7.53	TRUE	1.38479	(1.1788351,1.6267332)	7.41476e-05	0.00118142	2103
NA	NA	mz311_2578_rt1_69	QI263	HILIC	FALSE	311.258	1.69	TRUE	1.42911	(1.2100621,1.6878097)	2.59832e-05	0.000524787	2103
NA	NA	mz315_1336_rt2_07	QI14798	HILIC	FALSE	315.134	2.07	TRUE	0.796428	(0.6818648,0.9302407)	0.00407184	0.0267845	2103
NA	NA	mz316_1175_rt1_93	QI972	HILIC	FALSE	316.118	1.93	TRUE	0.80687	(0.7035403,0.9253760)	0.00214641	0.0170587	2103
NA	NA	mz317_1493_rt2_1	QI1631	HILIC	FALSE	317.149	2.1	TRUE	0.758459	(0.6584760,0.8736245)	0.000126497	0.00183229	2103
NA	NA	mz318_1332_rt2_08	QI1446	HILIC	FALSE	318.133	2.08	TRUE	0.819337	(0.7215578,0.9303651)	0.0021181	0.0169973	2103
NA	NA	mz321_2784_rt1_83	QI15557	HILIC	FALSE	321.278	1.83	TRUE	0.83976	(0.7354527,0.9588603)	0.00985789	0.049256	2103
NA	NA	mz328_2301_rt6_1	QI10773	HILIC	FALSE	328.23	6.1	TRUE	1.2432	(1.0571096,1.4620546)	0.0085067	0.0448478	2103
NA	NA	mz329_149_rt2_24	QI14216	HILIC	FALSE	329.149	2.24	TRUE	0.796759	(0.6826627,0.9299258)	0.00396054	0.0261724	2103
NA	NA	mz330_1393_rt5_7	QI11391	HILIC	FALSE	330.139	5.7	TRUE	2.53088	(2.0718993,3.0915332)	0	0	2103
NA	NA	mz330_2457_rt6_07	QI10834	HILIC	FALSE	330.246	6.07	TRUE	1.32463	(1.1351433,1.5457435)	0.000357894	0.00410576	2103
CAR(10:0(OH))	NA	mz332_2427_rt7_71	QI6570	HILIC	FALSE	332.243	7.71	TRUE	0.730067	(0.6317603,0.8436719)	2.01098e-05	0.00043041	2103
NA	NA	mz337_109_rt8_21	QI6906	HILIC	FALSE	337.109	8.21	TRUE	0.771626	(0.6808523,0.8745029)	4.90723e-05	0.000868761	2103
NA	NA	mz338_0499_rt2_2	QI14301	HILIC	FALSE	338.05	2.2	TRUE	0.808176	(0.6951127,0.9396307)	0.00560951	0.0343762	2103
SM(d18:1_16:0)	HMDB0010169	mz343_2853_rt7_39	QI6374	HILIC	FALSE	343.285	7.39	TRUE	0.749031	(0.6488558,0.8646717)	7.98035e-05	0.00125756	2103
NA	NA	mz343_787_rt7_39	QI6377	HILIC	FALSE	343.787	7.39	TRUE	0.77504	(0.6704069,0.8960047)	0.000573283	0.00608954	2103
NA	NA	mz344_0591_rt8_28	QI9231	HILIC	FALSE	344.059	8.28	TRUE	0.828574	(0.7317318,0.9382338)	0.00302358	0.0220092	2103
hydroxydehydro nifedipine	NA	mz347_0869_rt3_88	QI3190	HILIC	FALSE	347.087	3.88	TRUE	1.16557	(1.0382135,1.3085416)	0.00945337	0.0479912	2103
NA	NA	mz348_0685_rt5_07	QI12064	HILIC	FALSE	348.068	5.07	TRUE	1.27053	(1.0738943,1.5031719)	0.00525493	0.0329469	2103
Palatinose	NA	mz360_1497_rt6_26	QI5648	HILIC	FALSE	360.15	6.26	TRUE	1.21997	(1.0496850,1.4178771)	0.009538	0.0479912	2103
NA	NA	mz366_1389_rt6_25	QI5631	HILIC	FALSE	366.139	6.25	TRUE	0.771263	(0.6713232,0.8860808)	0.000244365	0.00318563	2103
NA	NA	mz366_2632_rt7_11	QI6276	HILIC	FALSE	366.263	7.11	TRUE	0.814693	(0.7022401,0.9451526)	0.00684498	0.0394205	2103
NA	NA	mz367_2841_rt1_83	QI628	HILIC	FALSE	367.284	1.83	TRUE	0.817771	(0.7144040,0.9360954)	0.0035255	0.0243056	2103
NA	NA	mz384_3249_rt7_21	QI9892	HILIC	FALSE	384.325	7.21	TRUE	0.782621	(0.6824318,0.8975194)	0.000453313	0.00504868	2103
NA	NA	mz397_3814_rt1_84	QI694	HILIC	FALSE	397.381	1.84	TRUE	0.773656	(0.6781093,0.8826659)	0.000135803	0.00194742	2103
NA	NA	mz402_2636_rt1_82	QI574	HILIC	FALSE	402.264	1.82	TRUE	0.831552	(0.7245498,0.9543570)	0.00867226	0.0453869	2103
NA	NA	mz410_0508_rt4_96	QI4039	HILIC	FALSE	410.051	4.96	TRUE	2.94551	(2.4116009,3.5976304)	0	0	2103
NA	NA	mz435_383_rt1_75	QI15829	HILIC	FALSE	435.383	1.75	TRUE	0.830238	(0.7262707,0.9490893)	0.00642162	0.037795	2103
NA	NA	mz437_3612_rt1_79	QI490	HILIC	FALSE	437.361	1.79	TRUE	0.775927	(0.6757353,0.8909746)	0.000322582	0.003823	2103
Valine	HMDB0000883	mz440_1716_rt7_62	QI9685	HILIC	FALSE	440.172	7.62	TRUE	1.51399	(1.2763966,1.7958159)	1.91805e-06	5.50097e-05	2103
NA	NA	mz441_2848_rt1_84	QI680	HILIC	FALSE	441.285	1.84	TRUE	0.816297	(0.7169519,0.9294076)	0.00217194	0.017113	2103
NA	NA	mz453_3211_rt1_86	QI799	HILIC	FALSE	453.321	1.86	TRUE	0.831704	(0.7253456,0.9536573)	0.00829881	0.0442398	2103
NA	NA	mz459_3692_rt1_83	QI618	HILIC	FALSE	459.369	1.83	TRUE	0.827798	(0.7201549,0.9515308)	0.00783735	0.042896	2103
NA	NA	mz464_2178_rt5_39	QI11739	HILIC	FALSE	464.218	5.39	TRUE	0.718112	(0.6143256,0.8394322)	3.21607e-05	0.000623222	2103
NA	NA	mz466_3885_rt1_83	QI15539	HILIC	FALSE	466.389	1.83	TRUE	0.762214	(0.6628705,0.8764452)	0.000138446	0.00196566	2103
NA	NA	mz483_3683_rt1_82	QI563	HILIC	FALSE	483.368	1.82	TRUE	0.823711	(0.7163907,0.9471075)	0.00646992	0.0378688	2103
NA	NA	mz486_1732_rt5_09	QI4144	HILIC	FALSE	486.173	5.09	TRUE	1.31093	(1.1107164,1.5472261)	0.00136578	0.0119422	2103
NA	NA	mz492_0783_rt8_2	QI6891	HILIC	FALSE	492.078	8.2	TRUE	0.807686	(0.7015175,0.9299218)	0.00297393	0.0217582	2103
NA	NA	mz496_1364_rt8_27	QI6955	HILIC	FALSE	496.136	8.27	TRUE	0.818806	(0.7227947,0.9275718)	0.00168103	0.0142639	2103
NA	NA	mz500_4317_rt1_76	QI15791	HILIC	FALSE	500.432	1.76	TRUE	0.812503	(0.7030328,0.9390181)	0.00492145	0.0312631	2103
NA	NA	mz503_4099_rt1_83	QI613	HILIC	FALSE	503.41	1.83	TRUE	0.822557	(0.7159665,0.9450167)	0.00580459	0.0349739	2103
NA	NA	mz504_2076_rt3_26	QI13375	HILIC	FALSE	504.208	3.26	TRUE	1.28838	(1.0951387,1.5157285)	0.00224268	0.0174783	2103
LPC(O-18:0)	NA	mz510_3915_rt7_95	QI9457	HILIC	FALSE	510.392	7.95	TRUE	0.811103	(0.7044470,0.9339082)	0.00360788	0.0246367	2103
NA	NA	mz510_4154_rt1_77	QI15770	HILIC	FALSE	510.415	1.77	TRUE	0.830876	(0.7298019,0.9459489)	0.00511641	0.0323213	2103
NA	NA	mz512_1107_rt8_27	QI9235	HILIC	FALSE	512.111	8.27	TRUE	0.830716	(0.7342676,0.9398326)	0.00322488	0.0230074	2103
NA	NA	mz522_1794_rt4_39	QI12706	HILIC	FALSE	522.179	4.39	TRUE	0.793941	(0.6889305,0.9149583)	0.00143348	0.0123832	2103
Carotene	NA	mz536_4354_rt1_69	QI15953	HILIC	FALSE	536.435	1.69	TRUE	0.754153	(0.6584947,0.8637079)	4.55881e-05	0.00082502	2103
NA	NA	mz538_5198_rt4_57	QI12583	HILIC	FALSE	538.52	4.57	TRUE	0.736122	(0.6398359,0.8468977)	1.84123e-05	0.000400049	2103
NA	NA	mz540_4636_rt1_75	QI15827	HILIC	FALSE	540.464	1.75	TRUE	0.795298	(0.6877538,0.9196599)	0.00200293	0.0163193	2103
NA	NA	mz542_4785_rt1_75	QI15843	HILIC	FALSE	542.479	1.75	TRUE	0.784635	(0.6812736,0.9036781)	0.000764623	0.0076495	2103
NA	NA	mz546_2549_rt2_83	QI2551	HILIC	FALSE	546.255	2.83	TRUE	1.32872	(1.1278448,1.5653810)	0.000677421	0.00698865	2103
NA	NA	mz547_4361_rt1_77	QI15783	HILIC	FALSE	547.436	1.77	TRUE	0.805109	(0.6978614,0.9288394)	0.00295833	0.0217551	2103
NA	NA	mz549_452_rt1_82	QI15630	HILIC	FALSE	549.452	1.82	TRUE	0.79024	(0.6858612,0.9105029)	0.00112531	0.010149	2103
LPC(20:0)	NA	mz552_4029_rt7_72	QI6578	HILIC	FALSE	552.403	7.72	TRUE	0.792295	(0.6980903,0.8992113)	0.0003123	0.00379524	2103
LPC(18:2)	NA	mz558_295_rt7_93	QI9464	HILIC	FALSE	558.295	7.93	TRUE	0.777731	(0.6677173,0.9058715)	0.0012363	0.0109435	2103
NA	NA	mz565_447_rt1_79	QI15705	HILIC	FALSE	565.447	1.79	TRUE	0.822097	(0.7097939,0.9521685)	0.00894944	0.0459982	2103
NA	NA	mz566_4769_rt1_74	QI15854	HILIC	FALSE	566.477	1.74	TRUE	0.797517	(0.6927168,0.9181734)	0.00164605	0.0140502	2103
NA	NA	mz568_4935_rt1_84	QI682	HILIC	FALSE	568.494	1.84	TRUE	0.789976	(0.6805590,0.9169842)	0.00193982	0.0158954	2103
NA	NA	mz575_5026_rt1_67	QI15993	HILIC	FALSE	575.503	1.67	TRUE	1.42288	(1.2191635,1.6606413)	7.69358e-06	0.000193554	2103
DG(34:1)	HMDB0007021	mz577_5184_rt1_67	QI201	HILIC	FALSE	577.518	1.67	TRUE	1.46313	(1.2516851,1.7103010)	1.76324e-06	5.16018e-05	2103
NA	NA	mz578_3218_rt8_24	QI6923	HILIC	FALSE	578.322	8.24	TRUE	0.788143	(0.6879265,0.9029591)	0.000601169	0.00629253	2103
NA	NA	mz579_2928_rt5_81	QI11226	HILIC	FALSE	579.293	5.81	TRUE	1.37385	(1.1704461,1.6125977)	0.00010228	0.00157709	2103
NA	NA	mz580_2793_rt7_9	QI6721	HILIC	FALSE	580.279	7.9	TRUE	1.29789	(1.1157855,1.5097214)	0.000724069	0.00741654	2103
NA	NA	mz581_2392_rt2_03	QI14931	HILIC	FALSE	581.239	2.03	TRUE	0.769457	(0.6627057,0.8934053)	0.00058363	0.00615386	2103
NA	NA	mz581_3086_rt5_78	QI4921	HILIC	FALSE	581.309	5.78	TRUE	1.23602	(1.0541806,1.4492363)	0.0090591	0.0463955	2103
NA	NA	mz581_4347_rt1_63	QI16030	HILIC	FALSE	581.435	1.63	TRUE	0.774979	(0.6840773,0.8779609)	6.21319e-05	0.00103601	2103
NA	NA	mz584_5246_rt1_7	QI270	HILIC	FALSE	584.525	1.7	TRUE	1.44045	(1.2201203,1.7005678)	1.64089e-05	0.000373498	2103
NA	NA	mz586_5041_rt1_77	QI15766	HILIC	FALSE	586.504	1.77	TRUE	0.811117	(0.7047890,0.9334858)	0.00349989	0.0243056	2103
NA	NA	mz592_47_rt7_7	QI9632	HILIC	FALSE	592.47	7.7	TRUE	0.828818	(0.7230504,0.9500563)	0.00702822	0.0401029	2103
NA	NA	mz601_5186_rt1_67	QI15983	HILIC	FALSE	601.519	1.67	TRUE	1.26093	(1.0807561,1.4711306)	0.00320697	0.022994	2103
NA	NA	mz601_5189_rt5_03	QI12089	HILIC	FALSE	601.519	5.03	TRUE	0.791138	(0.6799679,0.9204835)	0.00242619	0.0185062	2103
NA	NA	mz603_293_rt5_75	QI11307	HILIC	FALSE	603.293	5.75	TRUE	1.43941	(1.2382142,1.6733092)	2.12283e-06	5.9689e-05	2103
NA	NA	mz605_0627_rt4_5	QI3557	HILIC	FALSE	605.063	4.5	TRUE	0.814762	(0.7049341,0.9417005)	0.00555299	0.0342983	2103
NA	NA	mz606_5094_rt1_7	QI15919	HILIC	FALSE	606.509	1.7	TRUE	1.35665	(1.1560574,1.5920568)	0.000186742	0.00255036	2103
NA	NA	mz614_3809_rt6_26	QI5641	HILIC	FALSE	614.381	6.26	TRUE	0.75093	(0.6634325,0.8499671)	5.84951e-06	0.000149789	2103
NA	NA	mz615_3355_rt8_12	QI6840	HILIC	FALSE	615.336	8.12	TRUE	0.69043	(0.6106973,0.7805729)	3.28602e-09	1.62488e-07	2103
NA	NA	mz624_5192_rt1_69	QI256	HILIC	FALSE	624.519	1.69	TRUE	1.4397	(1.2222111,1.6958792)	1.29209e-05	0.000303747	2103
NA	NA	mz626_4981_rt1_8	QI15683	HILIC	FALSE	626.498	1.8	TRUE	0.788355	(0.6918793,0.8982836)	0.000356202	0.00410576	2103
NA	NA	mz628_5143_rt1_74	QI333	HILIC	FALSE	628.514	1.74	TRUE	0.820182	(0.7153667,0.9403549)	0.00449014	0.0290039	2103
NA	NA	mz630_4244_rt7_73	QI9607	HILIC	FALSE	630.424	7.73	TRUE	0.805763	(0.7013296,0.9257482)	0.00229353	0.0176824	2103
NA	NA	mz631_3092_rt8_09	QI9376	HILIC	FALSE	631.309	8.09	TRUE	0.641679	(0.5615116,0.7332924)	7.23102e-11	4.93775e-09	2103
NA	NA	mz632_5241_rt1_69	QI250	HILIC	FALSE	632.524	1.69	TRUE	1.3839	(1.1858577,1.6150153)	3.73439e-05	0.000714015	2103
deoxyDHCer (d18:0_24:1)	NA	mz634_6486_rt1_72	QI15902	HILIC	FALSE	634.649	1.72	TRUE	1.52268	(1.2857172,1.8033090)	1.10504e-06	3.52139e-05	2103
NA	NA	mz638_1461_rt8_2	QI6892	HILIC	FALSE	638.146	8.2	TRUE	0.79379	(0.6927223,0.9096026)	0.000888893	0.00827709	2103
NA	NA	mz645_3248_rt7_99	QI9444	HILIC	FALSE	645.325	7.99	TRUE	1.45413	(1.2252462,1.7257610)	1.82943e-05	0.000400049	2103
NA	NA	mz652_5504_rt1_66	QI190	HILIC	FALSE	652.55	1.66	TRUE	1.31733	(1.1223424,1.5461989)	0.000745912	0.00754539	2103
PE(36:4)	HMDB0007121	mz658_5401_rt1_69	QI261	HILIC	FALSE	658.54	1.69	TRUE	1.47019	(1.2594046,1.7162639)	1.05556e-06	3.52139e-05	2103
NA	NA	mz659_2705_rt1_97	QI1071	HILIC	FALSE	659.27	1.97	TRUE	0.776265	(0.6732192,0.8950823)	0.000491589	0.00534044	2103
NA	NA	mz661_2991_rt7_99	QI6750	HILIC	FALSE	661.299	7.99	TRUE	1.27828	(1.0822097,1.5098720)	0.00385339	0.0258213	2103
NA	NA	mz661_5276_rt6_12	QI5461	HILIC	FALSE	661.528	6.12	TRUE	0.818474	(0.7034416,0.9523178)	0.00953636	0.0479912	2103
NA	NA	mz673_5256_rt7_57	QI9722	HILIC	FALSE	673.526	7.57	TRUE	0.763793	(0.6414301,0.9094985)	0.00248754	0.0187744	2103
NA	NA	mz682_539_rt1_68	QI228	HILIC	FALSE	682.539	1.68	TRUE	1.41136	(1.1931895,1.6694121)	5.78088e-05	0.000975268	2103
PE(32:1)	NA	mz690_506_rt5_71	QI4805	HILIC	FALSE	690.506	5.71	TRUE	1.40763	(1.1922844,1.6618606)	5.43566e-05	0.000950578	2103
NA	NA	mz690_542_rt6_88	QI10087	HILIC	FALSE	690.542	6.88	TRUE	0.724637	(0.6281620,0.8359285)	9.94138e-06	0.000245792	2103
NA	NA	mz690_6167_rt1_83	QI15536	HILIC	FALSE	690.617	1.83	TRUE	0.78298	(0.6761603,0.9066755)	0.00107894	0.0097924	2103
PC(O-30:0)	NA	mz692_5569_rt6_91	QI10058	HILIC	FALSE	692.557	6.91	TRUE	0.702978	(0.6051303,0.8166463)	4.0528e-06	0.000107624	2103
NA	NA	mz695_5085_rt7_53	QI6460	HILIC	FALSE	695.509	7.53	TRUE	0.784885	(0.6608586,0.9321870)	0.00577718	0.0349556	2103
PE(P-35:2)_PE(O-35:3)	NA	mz714_5421_rt5_62	QI11485	HILIC	FALSE	714.542	5.62	TRUE	0.828863	(0.7216524,0.9520007)	0.00790719	0.0429504	2103
NA	HMDB0007897*	mz716_5575_rt6_79	QI6080	HILIC	FALSE	716.558	6.79	TRUE	0.734855	(0.6367373,0.8480927)	2.51711e-05	0.000515648	2103
NA	HMDB0007896*	mz718_573_rt6_85	QI6095	HILIC	FALSE	718.573	6.85	TRUE	0.727191	(0.6261852,0.8444899)	2.97686e-05	0.000584769	2103
NA	NA	mz719_569_rt7_63	QI9668	HILIC	FALSE	719.569	7.63	TRUE	0.773406	(0.6772127,0.8832629)	0.000149592	0.00210309	2103
PC(O-32:0)	NA	mz720_5887_rt6_88	QI6109	HILIC	FALSE	720.589	6.88	TRUE	0.778384	(0.6718085,0.9018677)	0.000853629	0.00805332	2103
NA	NA	mz737_555_rt7_37	QI6372	HILIC	FALSE	737.555	7.37	TRUE	0.81463	(0.7077224,0.9376878)	0.00428592	0.0279364	2103
N-AcetylGlucosamine	NA	mz740_5579_rt6_77	QI10118	HILIC	FALSE	740.558	6.77	TRUE	0.823132	(0.7153096,0.9472066)	0.0065854	0.0383881	2103
PC(33:2)	NA	mz744_5535_rt6_84	QI10100	HILIC	FALSE	744.553	6.84	TRUE	0.819909	(0.7102491,0.9464998)	0.00671711	0.0388401	2103
PC(P-34:1)_PC(O-34:2)	NA	mz744_5891_rt6_84	QI6091	HILIC	FALSE	744.589	6.84	TRUE	0.629214	(0.5398051,0.7334323)	3.13134e-09	1.60369e-07	2103
PC(P-34:0)_PC(O-34:1)	NA	mz746_604_rt6_84	QI6093	HILIC	FALSE	746.604	6.84	TRUE	0.627248	(0.5394894,0.7292823)	1.31718e-09	7.87015e-08	2103
NA	NA	mz760_0499_rt7_42	QI9809	HILIC	FALSE	760.05	7.42	TRUE	0.776732	(0.6700378,0.9004146)	0.000804026	0.00773808	2103
PC(35:2)	NA	mz772_5833_rt6_78	QI10116	HILIC	FALSE	772.583	6.78	TRUE	0.768702	(0.6665209,0.8865487)	0.000300707	0.00368559	2103
NA	NA	mz779_6024_rt7_25	QI9873	HILIC	FALSE	779.602	7.25	TRUE	0.77851	(0.6653795,0.9108762)	0.00177729	0.0149043	2103
NA	NA	mz782_5668_rt7_63	QI6523	HILIC	FALSE	782.567	7.63	TRUE	1.30265	(1.1166738,1.5196013)	0.000768151	0.0076495	2103
NA	NA	mz782_6027_rt5_6	QI4678	HILIC	FALSE	782.603	5.6	TRUE	0.744283	(0.6461005,0.8573849)	4.28112e-05	0.000787067	2103
GlcCer(d18:2_22:0)	NA	mz782_6491_rt2_1	QI14618	HILIC	FALSE	782.649	2.1	TRUE	0.762932	(0.6655204,0.8746010)	0.000103408	0.00157752	2103
NA	NA	mz782_6493_rt2_87	QI13606	HILIC	FALSE	782.649	2.87	TRUE	0.730971	(0.6334931,0.8434481)	1.77485e-05	0.000397677	2103
NA	NA	mz786_5031_rt5_6	QI11519	HILIC	FALSE	786.503	5.6	TRUE	1.26166	(1.0639507,1.4961076)	0.00752194	0.0416466	2103
NA	NA	mz792_6698_rt2_1	QI14562	HILIC	FALSE	792.67	2.1	TRUE	0.78057	(0.6750351,0.9026054)	0.000830078	0.00788299	2103
NA	NA	mz792_6699_rt2_87	QI13613	HILIC	FALSE	792.67	2.87	TRUE	0.806173	(0.6974527,0.9318420)	0.00355633	0.0244008	2103
TG(46:1)	HMDB0010412	mz794_7209_rt1_63	QI165	HILIC	FALSE	794.721	1.63	TRUE	1.30281	(1.1163829,1.5203768)	0.000787324	0.00773498	2103
NA	NA	mz796_6645_rt2_1	QI1585	HILIC	FALSE	796.664	2.1	TRUE	0.819323	(0.7157480,0.9378865)	0.00385327	0.0258213	2103
NA	NA	mz85_0285_rt4_96	QI12155	HILIC	FALSE	85.0285	4.96	TRUE	6.46868	(4.9567512,8.4417724)	0	0	2103
NA	NA	mz97_0286_rt4_7	QI12466	HILIC	FALSE	97.0286	4.7	TRUE	4.85476	(3.8197969,6.1701421)	0	0	2103
N1 acetylspermidine	HMDB0001276	n1_acetylspermidine	QI7565	HILIC	TRUE	188.176	10.09	TRUE	0.783752	(0.6724777,0.9134389)	0.00181559	0.0150495	2103
N2,N2-Dimethylguanosine	HMDB0004824	n2_n2_dimethylguanosine	QI11589	HILIC	TRUE	312.13	5.51	TRUE	1.22618	(1.0612685,1.4167151)	0.00565959	0.0345355	2103
N-Acetylaspartic acid	HMDB0000812	n_acetylaspartic_acid	QI12630	HILIC	TRUE	176.055	4.51	TRUE	0.771396	(0.6488142,0.9171368)	0.00328617	0.0232136	2103
DG(36:3)	HMDB0007059	nh4_c36_3_dag_or_tag_fragment	QI240	HILIC	TRUE	636.555	1.69	TRUE	1.33921	(1.1421641,1.5702618)	0.00032207	0.003823	2103
NA	HMDB0007031	nh4_c36_4_dag_or_tag_fragment	QI15954	HILIC	TRUE	634.54	1.69	TRUE	1.32817	(1.1409070,1.5461625)	0.000252188	0.00322831	2103
Pantothenic acid	HMDB0000210	pantothenate	QI13424	HILIC	TRUE	220.118	3.16	TRUE	1.23142	(1.0662434,1.4221749)	0.00461352	0.0295348	2103
Taurine	HMDB0000251	taurine	QI5609	HILIC	TRUE	126.022	6.23	TRUE	0.821332	(0.7072449,0.9538228)	0.00989241	0.049256	2103
Thiamine	HMDB0000235	thiamine	QI8646	HILIC	TRUE	265.111	10.01	TRUE	1.23399	(1.0551665,1.4431215)	0.00848252	0.0448478	2103
Threonine	HMDB0000167	threonine	QI9578	HILIC	TRUE	120.066	7.75	TRUE	0.734418	(0.6320846,0.8533201)	5.53518e-05	0.000956319	2103
Uric acid	HMDB0000289	urate	QI12689	HILIC	TRUE	169.036	4.41	TRUE	1.2652	(1.0803542,1.4816812)	0.0035109	0.0243056	2103
Valine	HMDB0000883	valine	TF32	HILIC	TRUE	118.087	7.61	TRUE	1.58069	(1.3413717,1.8626957)	4.59431e-08	1.78718e-06	2103
Xanthine	HMDB0000292	xanthine	QI3183	HILIC	TRUE	153.041	3.87	TRUE	1.26004	(1.0849088,1.4634454)	0.00246729	0.0187201	2103
1,5-Anhydrosorbitol	NA	__5_ag___1_deoxyglucose	NA	AMIDE	TRUE	NA	NA	TRUE	0.381996	(0.3206657,0.4550571)	0	0	2103
2-Aminooctanoic acid	NA	__aminoadipic_acid	NA	AMIDE	TRUE	NA	NA	TRUE	1.26903	(1.0889247,1.4789323)	0.00228223	0.0176824	2103
Salicyluric acid	NA	__hydroxybutyric_acid	NA	AMIDE	TRUE	NA	NA	TRUE	1.74821	(1.4958941,2.0430905)	2.1565e-12	1.81907e-10	2103
Ketoisovaleric acid	NA	__ketoisovaleric_acid_kiv	NA	AMIDE	TRUE	NA	NA	TRUE	1.46743	(1.2257514,1.7567665)	2.95524e-05	0.000584769	1802
Oxoglutaric acid	NA	a_ketoglutaric_acid	NA	AMIDE	TRUE	NA	NA	TRUE	1.30805	(1.1376817,1.5039328)	0.000162134	0.00225728	2103
Gluconic acid	NA	d_gluconic_acid	NA	AMIDE	TRUE	NA	NA	TRUE	1.9158	(1.6270918,2.2557420)	6.21725e-15	6.8581e-13	2103
Glucose	NA	glucose_fructose_galactose	NA	AMIDE	TRUE	NA	NA	TRUE	7.04161	(5.3347881,9.2945101)	0	0	2103
Glutamic acid	NA	glutamic_acid	NA	AMIDE	TRUE	NA	NA	TRUE	1.31285	(1.1207163,1.5379178)	0.000747173	0.00754539	1802
3-Indolepropionic acid	NA	indole_3_propanoic_acid	NA	AMIDE	TRUE	NA	NA	TRUE	0.80386	(0.7005590,0.9223931)	0.00186399	0.0153618	2103
Lactic acid	NA	lactic_acid	NA	AMIDE	TRUE	NA	NA	TRUE	1.56391	(1.3392214,1.8262883)	1.59468e-08	6.92961e-07	2103
Malic acid	NA	malic_acid	NA	AMIDE	TRUE	NA	NA	TRUE	1.26778	(1.0900210,1.4745216)	0.00208196	0.0168674	2103
N-Palmitoyl taurine	NA	n_palmitoyl_taurine	NA	AMIDE	TRUE	NA	NA	TRUE	1.38084	(1.1334042,1.6823030)	0.0013606	0.0119422	1356
Pyruvic acid	NA	pyruvic_acid	NA	AMIDE	TRUE	NA	NA	TRUE	1.53114	(1.2948921,1.8104842)	6.28043e-07	2.25153e-05	2103
Quinolinic acid	NA	quinolinic_acid	NA	AMIDE	TRUE	NA	NA	TRUE	1.22566	(1.0614150,1.4153200)	0.00557287	0.0342983	2103
UDP-GlcNAc	NA	udp_glcnac	NA	AMIDE	TRUE	NA	NA	TRUE	1.51415	(1.2738210,1.7998164)	2.54421e-06	7.01615e-05	1705
Uric acid	NA	uric_acid	NA	AMIDE	TRUE	NA	NA	TRUE	1.71451	(1.4455410,2.0335334)	5.93256e-10	3.69882e-08	2103
Xanthurenic_acid	NA	xanthurenic_acid	NA	AMIDE	TRUE	NA	NA	TRUE	1.23634	(1.0545673,1.4494442)	0.00892817	0.0459982	2103
Odds ratio (95% CI) for prevalent diabetes for every 1 SD increase in LC-MS peak measurement were calculated from logistic regression models adjusted for age, gender, batch, oral diabetes medication use, and insulin use and that were associated with prevalent diabetes in age, gender, and batch adjusted models.

## Sheet: Tbl4
Supplemental Table 4. Targeted and nontargeted LC-MS features uniquely associated with prevalent diabetes.
RefMetName	HMDB ID	Compound ID	Study Compound Name	M/Z	RT	LC-MS Method	Targeted Method	Primary Feature/Ion	Effect Size (OR)	95% CI	P	FDR q (1434 primary features)	N
5-Oxo-ETE	NA	NA	__oxo_ete	NA	NA	AMIDE	TRUE	TRUE	0.856007	(0.7599106,0.9642560)	0.0104955	0.0210792	1702
CAR(10:0)	HMDB0000651	QI6344	c10_carnitine	316.248	7.32	HILIC	TRUE	TRUE	0.817813	(0.7463118,0.8961647)	1.64328e-05	5.50576e-05	2749
CAR(8:0)	HMDB0000791	QI6463	c8_carnitine	288.216	7.54	HILIC	TRUE	TRUE	0.881733	(0.8055076,0.9651728)	0.00636484	0.0133244	2749
DHA	NA	NA	dha	NA	NA	AMIDE	TRUE	TRUE	0.792014	(0.7008369,0.8950527)	0.00018642	0.000523143	1702
Inosine	NA	NA	inosine_15n4	NA	NA	AMIDE	TRUE	TRUE	0.704877	(0.5608612,0.8858715)	0.00270695	0.00611302	502
NA	NA	QI3403	mz147_0763_rt4_24	147.076	4.24	HILIC	FALSE	TRUE	1.18861	(1.0873426,1.2993148)	0.000142966	0.000406688	2749
NA	NA	QI3745	mz147_0763_rt4_71	147.076	4.71	HILIC	FALSE	TRUE	1.36761	(1.2472501,1.4995896)	2.72913e-11	2.15031e-10	2749
NA	NA	QI7072	mz152_022_rt8_49	152.022	8.49	HILIC	FALSE	TRUE	0.895469	(0.8193174,0.9786993)	0.014901	0.0290588	2749
NA	NA	QI2899	mz154_0609_rt3_43	154.061	3.43	HILIC	FALSE	TRUE	0.892412	(0.8189583,0.9724540)	0.00939504	0.0190828	2749
NA	NA	QI7388	mz157_1698_rt9_39	157.17	9.39	HILIC	FALSE	TRUE	0.883071	(0.8088834,0.9640624)	0.00547903	0.0116055	2749
NA	NA	QI14611	mz158_1175_rt2_1	158.118	2.1	HILIC	FALSE	TRUE	0.899786	(0.8229537,0.9837911)	0.0204055	0.0380513	2749
NA	NA	QI3770	mz171_0762_rt4_73	171.076	4.73	HILIC	FALSE	TRUE	1.18333	(1.0728104,1.3052310)	0.0007658	0.00191317	2749
NA	NA	QI8948	mz172_133_rt8_84	172.133	8.84	HILIC	FALSE	TRUE	0.874042	(0.7976780,0.9577157)	0.00389931	0.0085238	2749
NA	NA	QI8618	mz174_1124_rt10_18	174.112	10.18	HILIC	FALSE	TRUE	0.851046	(0.7779648,0.9309918)	0.000430107	0.00112345	2749
NA	NA	QI15498	mz175_1481_rt1_84	175.148	1.84	HILIC	FALSE	TRUE	0.804734	(0.7366948,0.8790575)	1.4357e-06	5.71887e-06	2749
NA	NA	QI3876	mz178_0169_rt4_82	178.017	4.82	HILIC	FALSE	TRUE	0.873386	(0.8030903,0.9498356)	0.00156635	0.00368825	2749
NA	NA	QI4508	mz178_0896_rt5_43	178.09	5.43	HILIC	FALSE	TRUE	1.25344	(1.1437380,1.3736725)	1.33926e-06	5.36672e-06	2749
NA	NA	QI14711	mz183_1379_rt2_09	183.138	2.09	HILIC	FALSE	TRUE	0.895433	(0.8193264,0.9786100)	0.0148071	0.0289283	2749
NA	NA	QI1530	mz184_1696_rt2_1	184.17	2.1	HILIC	FALSE	TRUE	0.895014	(0.8213023,0.9753417)	0.0114283	0.0228566	2749
NA	NA	QI3267	mz185_1285_rt4_04	185.129	4.04	HILIC	FALSE	TRUE	0.899375	(0.8251747,0.9802468)	0.0157742	0.0304471	2749
NA	NA	QI1659	mz191_1066_rt2_1	191.107	2.1	HILIC	FALSE	TRUE	1.12128	(1.0248984,1.2267238)	0.0125503	0.0249268	2749
NA	NA	QI12000	mz192_1052_rt5_13	192.105	5.13	HILIC	FALSE	TRUE	1.33433	(1.2085196,1.4732413)	1.14141e-08	6.3688e-08	2749
NA	NA	QI1578	mz200_2009_rt2_1	200.201	2.1	HILIC	FALSE	TRUE	0.901666	(0.8261687,0.9840626)	0.0203379	0.0380008	2749
NA	NA	QI2008	mz207_9732_rt2_28	207.973	2.28	HILIC	FALSE	TRUE	0.904688	(0.8317529,0.9840182)	0.0195104	0.0366683	2749
NA	HMDB0034276	QI13602	mz211_144_rt2_88	211.144	2.88	HILIC	FALSE	TRUE	1.10635	(1.0124921,1.2089030)	0.0254538	0.0460868	2749
NA	NA	QI7253	mz217_0817_rt8_86	217.082	8.86	HILIC	FALSE	TRUE	0.878036	(0.8025009,0.9606815)	0.00459777	0.00991459	2749
NA	NA	QI15891	mz219_2107_rt1_72	219.211	1.72	HILIC	FALSE	TRUE	0.80019	(0.7333798,0.8730859)	5.41352e-07	2.33123e-06	2749
NA	NA	QI703	mz233_2263_rt1_84	233.226	1.84	HILIC	FALSE	TRUE	0.804417	(0.7366019,0.8784762)	1.27639e-06	5.1559e-06	2749
NA	NA	QI14960	mz242_1749_rt2_02	242.175	2.02	HILIC	FALSE	TRUE	0.885154	(0.8106609,0.9664919)	0.0065317	0.0136537	2749
NA	NA	QI9516	mz252_0452_rt7_8	252.045	7.8	HILIC	FALSE	TRUE	0.901759	(0.8255902,0.9849548)	0.0216387	0.0401942	2749
NA	NA	QI2799	mz257_2264_rt3_22	257.226	3.22	HILIC	FALSE	TRUE	1.16137	(1.0430683,1.2930836)	0.00634796	0.0133084	2749
NA	NA	QI5153	mz259_2012_rt5_94	259.201	5.94	HILIC	FALSE	TRUE	0.898185	(0.8236508,0.9794644)	0.0151233	0.0293859	2749
NA	NA	QI450	mz265_2522_rt1_78	265.252	1.78	HILIC	FALSE	TRUE	0.832438	(0.7621809,0.9091716)	4.57074e-05	0.000142179	2749
NA	NA	QI1902	mz269_976_rt2_2	269.976	2.2	HILIC	FALSE	TRUE	0.903109	(0.8303088,0.9822926)	0.0174729	0.0334528	2749
NA	NA	QI3810	mz287_0998_rt4_77	287.1	4.77	HILIC	FALSE	TRUE	1.30912	(1.1902239,1.4398859)	2.9439e-08	1.55777e-07	2749
NA	NA	QI8792	mz291_0121_rt9_46	291.012	9.46	HILIC	FALSE	TRUE	0.819122	(0.7520968,0.8921204)	4.63141e-06	1.69858e-05	2749
NA	NA	QI5101	mz296_0641_rt5_92	296.064	5.92	HILIC	FALSE	TRUE	0.91019	(0.8387191,0.9877505)	0.0241106	0.0440441	2749
NA	NA	QI13988	mz314_2686_rt2_5	314.269	2.5	HILIC	FALSE	TRUE	0.751487	(0.6871134,0.8218921)	4.03299e-10	2.71775e-09	2749
NA	NA	QI7403	mz318_2131_rt9_46	318.213	9.46	HILIC	FALSE	TRUE	1.14728	(1.0455827,1.2588696)	0.00371755	0.00813888	2749
NA	NA	QI14570	mz328_3206_rt2_1	328.321	2.1	HILIC	FALSE	TRUE	0.905389	(0.8299206,0.9877197)	0.0252066	0.0457548	2749
NA	NA	QI1459	mz331_1286_rt2_09	331.129	2.09	HILIC	FALSE	TRUE	0.857008	(0.7851371,0.9354588)	0.000554597	0.00142271	2749
NA	NA	QI1376	mz352_3205_rt2_07	352.32	2.07	HILIC	FALSE	TRUE	0.905542	(0.8289903,0.9891635)	0.0276836	0.0497234	2749
NA	NA	QI7101	mz355_011_rt8_58	355.011	8.58	HILIC	FALSE	TRUE	0.903693	(0.8284103,0.9858175)	0.0224995	0.0415777	2749
NA	NA	QI10869	mz388_2537_rt6_05	388.254	6.05	HILIC	FALSE	TRUE	1.10198	(1.0133280,1.1983929)	0.0232461	0.0427578	2749
NA	NA	QI15454	mz405_2996_rt1_85	405.3	1.85	HILIC	FALSE	TRUE	0.869294	(0.7994030,0.9452953)	0.00105473	0.00256353	2749
NA	NA	QI10440	mz432_2801_rt6_33	432.28	6.33	HILIC	FALSE	TRUE	1.10496	(1.0158841,1.2018383)	0.0199402	0.0373781	2749
NA	NA	QI12809	mz450_0478_rt4_22	450.048	4.22	HILIC	FALSE	TRUE	0.880829	(0.8072716,0.9610882)	0.00434436	0.00941059	2749
NA	NA	QI2691	mz468_2956_rt3_03	468.296	3.03	HILIC	FALSE	TRUE	1.14036	(1.0263842,1.2669930)	0.0144981	0.0283633	2749
NA	NA	QI14567	mz468_3891_rt2_1	468.389	2.1	HILIC	FALSE	TRUE	0.892024	(0.8177692,0.9730219)	0.00997485	0.0201464	2749
NA	NA	QI4658	mz734_5114_rt5_57	734.511	5.57	HILIC	FALSE	TRUE	0.853842	(0.7842612,0.9295957)	0.000269185	0.0007297	2749
NA	NA	QI6357	mz740_0719_rt7_35	740.072	7.35	HILIC	FALSE	TRUE	0.881955	(0.8093791,0.9610390)	0.00414401	0.00900771	2749
NA	NA	QI14660	mz756_633_rt2_1	756.633	2.1	HILIC	FALSE	TRUE	0.877066	(0.8068257,0.9534224)	0.00207086	0.0047897	2749
N-Acetylornithine	HMDB0003357	QI9076	n_acetylornithine	175.108	8.62	HILIC	TRUE	TRUE	1.13021	(1.0317653,1.2380433)	0.00847539	0.017313	2749
N-Docosanoyl taurine	NA	NA	n_docosanoyl_taurine	NA	NA	AMIDE	TRUE	TRUE	1.23878	(1.0982937,1.3972362)	0.000489172	0.0012662	1702
N-lignoceroyl taurine	NA	NA	n_lignoceroyl_taurine	NA	NA	AMIDE	TRUE	TRUE	1.19539	(1.0604797,1.3474610)	0.00348842	0.00767238	1702
alpha-N-Phenylacetylglutamine	HMDB0006344	QI12402	phenylacetylglutamine	265.118	4.75	HILIC	TRUE	TRUE	1.28867	(1.1698213,1.4195877)	2.78859e-07	1.27352e-06	2749
Proline betaine	HMDB0004827	QI8788	proline_betaine	144.102	9.48	HILIC	TRUE	TRUE	1.25385	(1.1442542,1.3739445)	1.25035e-06	5.07933e-06	2749
Odds ratio (95% CI) for prevalent diabetes for every 1 SD increase in known and unknown compounds determined from logistic regression models adjusted for age, gender, and batch. FDR calculated based on 1,434 unique compounds or primary LC-MS features that were measured.

## Sheet: Tbl5
Supplemental Table 5. Targeted and nontargeted LC-MS features associated with incident diabetes in the JHS
								JHS model 1: adjusted for age, sex, and batch						JHS model 2: adjusted for age, sex, batch, BMI, and FPG
HMDB ID	Compound ID	Study Compound Name	m/z	RT	LC-MS Method	Targeted	Primary Feature	Hazard Ratio	95% Lower	95% Upper	p	FDR q	n	Hazard Ratio	95% lower	95% upper	p	FDR q	n
NA	QI12155	m/z85.0285 RT4.96 (QI12155)	85.0285	4.96	HILIC	FALSE	TRUE	1.75082	1.54902	1.9789	0	0	1700	1.20361	1.03747	1.39636	0.0144692	0.100651	1641
NA	NA	Glucose/Fructose/Galactose	NA	NA	AMIDE	TRUE	TRUE	1.82457	1.62261	2.05167	0	0	1700	1.19713	1.02185	1.40249	0.0259145	0.149004	1641
NA	QI12196	m/z198.0973 RT4.92 (QI12196)	198.097	4.92	HILIC	FALSE	TRUE	1.69584	1.52206	1.88945	0	0	1700	1.19411	1.02125	1.39623	0.0261848	0.149484	1641
NA	QI12184	m/z163.06 RT4.93 (QI12184)	163.06	4.93	HILIC	FALSE	TRUE	1.68278	1.49325	1.89636	0	0	1700	1.15515	1.0084	1.32326	0.037465	0.183445	1641
HMDB0000289	QI12689	Urate	169.036	4.41	HILIC	TRUE	TRUE	1.67832	1.48316	1.89917	2.22e-16	3.92e-14	1700	1.37212	1.2031	1.56487	2.39e-06	0.000326088	1641
NA	QI12768	m/z173.0669 RT4.29 (QI12768)	173.067	4.29	HILIC	FALSE	TRUE	1.73923	1.52455	1.98415	2.22e-16	3.92e-14	1700	1.40798	1.22653	1.61627	1.17e-06	0.000206452	1641
NA	QI12466	m/z97.0286 RT4.7 (QI12466)	97.0286	4.7	HILIC	FALSE	TRUE	1.64893	1.45274	1.87163	1.02e-14	1.52e-12	1700	1.15346	0.997068	1.33439	0.0547986	0.224397	1641
NA	QI3948	m/z204.0865 RT4.89 (QI3948)	204.087	4.89	HILIC	FALSE	TRUE	1.35262	1.25259	1.46063	1.31e-14	1.79e-12	1700	1.18254	1.05303	1.32798	0.00461162	0.0500064	1641
NA	QI14818	m/z199.0462 RT2.07 (QI14818)	199.046	2.07	HILIC	FALSE	TRUE	1.64529	1.4494	1.86766	1.38e-14	1.79e-12	1700	1.34344	1.17838	1.53161	1.01e-05	0.000816838	1641
NA	QI6635	m/z588.3422 RT7.76 (QI6635)	588.342	7.76	HILIC	FALSE	TRUE	0.683415	0.619477	0.753951	3.06e-14	3.71e-12	1700	0.773281	0.701657	0.852217	2.17e-07	8.7e-05	1641
HMDB0010391	QI6611	LPC(20:1)	550.387	7.75	HILIC	TRUE	TRUE	0.706992	0.645337	0.774539	9.5e-14	1.03e-11	1700	0.784329	0.715279	0.860046	2.39e-07	8.7e-05	1641
HMDB0010405	QI9712	LPC(24:0)	608.464	7.58	HILIC	TRUE	TRUE	0.68951	0.625182	0.760458	1.01e-13	1.03e-11	1700	0.791467	0.715485	0.875518	5.58e-06	0.000570041	1641
NA	QI13770	m/z141.0405 RT2.66 (QI13770)	141.041	2.66	HILIC	FALSE	TRUE	1.59994	1.41366	1.81075	9.95e-14	1.03e-11	1700	1.31596	1.15582	1.49828	3.36e-05	0.00167225	1641
NA	QI2435	m/z184.0465 RT2.67 (QI2435)	184.047	2.67	HILIC	FALSE	TRUE	1.60082	1.41314	1.81344	1.41e-13	1.3e-11	1700	1.33065	1.16733	1.51682	1.91e-05	0.00123577	1641
NA	QI10116	m/z772.5833 RT6.78 (QI10116)	772.583	6.78	HILIC	FALSE	TRUE	0.678343	0.611623	0.752341	2.03e-13	1.79e-11	1700	0.756518	0.678718	0.843236	4.67e-07	0.000100716	1641
NA	QI6748	m/z149.9927 RT7.99 (QI6748)	149.993	7.99	HILIC	FALSE	TRUE	1.55464	1.37974	1.75172	4.29e-13	3.33e-11	1700	1.28932	1.14058	1.45746	4.84e-05	0.00219686	1641
NA	QI12050	m/z549.488 RT5.09 (QI12050)	549.488	5.09	HILIC	FALSE	TRUE	1.54931	1.37514	1.74553	6.22e-13	4.64e-11	1700	1.37777	1.21972	1.5563	2.54e-07	8.7e-05	1641
HMDB0030097	QI2242	m/z185.0305 RT2.51 (QI2242)	185.03	2.51	HILIC	FALSE	TRUE	1.56049	1.38189	1.76218	7.21e-13	5.18e-11	1700	1.27424	1.12055	1.44901	0.000219283	0.00583052	1641
NA	QI9444	m/z645.3248 RT7.99 (QI9444)	645.325	7.99	HILIC	FALSE	TRUE	1.65185	1.4387	1.89657	1.08e-12	7.49e-11	1700	1.34961	1.17448	1.55084	2.36e-05	0.00130879	1641
HMDB0000123	QI9373	Glycine	76.0393	8.09	HILIC	TRUE	TRUE	0.655199	0.582631	0.736805	1.67e-12	1.12e-10	1700	0.751249	0.665663	0.847838	3.57e-06	0.000433086	1641
NA	QI15953	m/z536.4354 RT1.69 (QI15953)	536.435	1.69	HILIC	FALSE	TRUE	0.705185	0.639423	0.77771	2.68e-12	1.73e-10	1700	0.807414	0.729928	0.893124	3.24e-05	0.00165496	1641
NA	QI6093	m/z746.604 RT6.84 (QI6093)	746.604	6.84	HILIC	FALSE	TRUE	0.67469	0.603589	0.754166	4.34e-12	2.72e-10	1700	0.74536	0.66236	0.838761	1.07e-06	0.000206452	1641
NA	QI1841	m/z141.0406 RT2.16 (QI1841)	141.041	2.16	HILIC	FALSE	TRUE	1.54001	1.36275	1.74031	4.49e-12	2.72e-10	1700	1.2948	1.14074	1.46966	6.4e-05	0.00258668	1641
HMDB0000161	QI6746	Alanine	90.0551	7.98	HILIC	TRUE	TRUE	1.49394	1.33316	1.67411	4.86e-12	2.86e-10	1700	1.24934	1.1106	1.40541	0.000210071	0.00566316	1641
HMDB0000158	TF31	Tyrosine	182.081	6.99	HILIC	TRUE	TRUE	1.50923	1.34234	1.69686	5.81e-12	3.32e-10	1700	1.23134	1.08449	1.39807	0.00131903	0.0215146	1641
NA	QI10969	m/z170.0925 RT6 (QI10969)	170.093	6	HILIC	FALSE	TRUE	1.4994	1.33401	1.68528	1.1e-11	5.77e-10	1700	1.28182	1.12852	1.45594	0.000133263	0.00417199	1641
NA	QI14793	m/z240.0728 RT2.07 (QI14793)	240.073	2.07	HILIC	FALSE	TRUE	1.53181	1.35306	1.73416	1.63e-11	8.11e-10	1700	1.2752	1.12303	1.44799	0.00017715	0.00505659	1641
HMDB0240212	TF16	DMGV	202.119	8.05	HILIC	TRUE	TRUE	1.51145	1.33961	1.70533	1.97e-11	9.56e-10	1700	1.27217	1.10936	1.45887	0.000570249	0.0116133	1641
NA	QI4319	m/z257.0742 RT5.27 (QI4319)	257.074	5.27	HILIC	FALSE	TRUE	1.46856	1.31088	1.64522	3.34e-11	1.54e-09	1700	1.3102	1.1598	1.48011	1.41e-05	0.00104675	1641
NA	QI11620	m/z244.0789 RT5.49 (QI11620)	244.079	5.49	HILIC	FALSE	TRUE	1.42036	1.27938	1.57688	4.73e-11	2.09e-09	1700	1.20236	1.071	1.34983	0.00179687	0.0262235	1641
HMDB0010386	TF8	LPC(18:2)	520.34	7.92	HILIC	TRUE	TRUE	0.677883	0.603281	0.761709	6.33e-11	2.67e-09	1700	0.788595	0.698185	0.890714	0.000131967	0.00417199	1641
NA	QI6091	m/z744.5891 RT6.84 (QI6091)	744.589	6.84	HILIC	FALSE	TRUE	0.680842	0.606128	0.764764	9.05e-11	3.74e-09	1700	0.748013	0.664169	0.842441	1.7e-06	0.000274726	1641
HMDB0011211	QI10124	PC(P-34:2)/PC(O-34:3)	742.574	6.75	HILIC	TRUE	TRUE	0.68919	0.615783	0.771348	9.29e-11	3.76e-09	1700	0.761612	0.678158	0.855335	4.25e-06	0.00048525	1641
HMDB0000883	QI9685	m/z440.1716 RT7.62 (QI9685)	440.172	7.62	HILIC	FALSE	TRUE	1.53333	1.34427	1.74898	1.93e-10	7.65e-09	1700	1.32724	1.1577	1.52162	4.91e-05	0.00219686	1641
NA	QI6693	m/z586.3269 RT7.83 (QI6693)	586.327	7.83	HILIC	FALSE	TRUE	0.705862	0.633632	0.786326	2.54e-10	9.86e-09	1700	0.777881	0.695888	0.869535	9.88e-06	0.000816838	1641
NA	QI9457	m/z510.3915 RT7.95 (QI9457)	510.392	7.95	HILIC	FALSE	TRUE	0.717067	0.645433	0.796651	5.88e-10	2.24e-08	1700	0.788163	0.710517	0.874294	6.84e-06	0.000603475	1641
HMDB0000187	QI9495	Serine	106.05	7.84	HILIC	TRUE	TRUE	0.717465	0.64483	0.798283	1.08e-09	3.81e-08	1700	0.746182	0.666873	0.834922	3.28e-07	9.09e-05	1641
HMDB0011511	QI9477	LPC(17:0)	510.355	7.89	HILIC	TRUE	TRUE	0.72346	0.650897	0.804113	1.94e-09	6.61e-08	1700	0.810159	0.730078	0.899024	7.36e-05	0.00280113	1641
HMDB0000883	TF32	Valine	118.087	7.61	HILIC	TRUE	TRUE	1.44286	1.27692	1.63036	4.06e-09	1.34e-07	1700	1.2508	1.10055	1.42156	0.000609473	0.0120713	1641
HMDB0007021	QI15967	DG(34:1)	612.555	1.68	HILIC	TRUE	TRUE	1.40902	1.2567	1.57981	4.25e-09	1.35e-07	1700	1.25631	1.1149	1.41566	0.000180255	0.00507065	1641
NA	QI15902	m/z634.6486 RT1.72 (QI15902)	634.649	1.72	HILIC	FALSE	TRUE	1.45951	1.28543	1.65717	5.39e-09	1.67e-07	1700	1.3105	1.15621	1.48537	2.32e-05	0.00130879	1641
NA	QI1839	m/z231.0723 RT2.16 (QI1839)	231.072	2.16	HILIC	FALSE	TRUE	1.31067	1.19531	1.43717	8.66e-09	2.59e-07	1700	1.20094	1.07345	1.34357	0.00138461	0.0219698	1641
NA	QI11307	m/z603.293 RT5.75 (QI11307)	603.293	5.75	HILIC	FALSE	TRUE	1.38901	1.24133	1.55425	1.01e-08	2.93e-07	1700	1.16977	1.03685	1.31972	0.0108338	0.086182	1641
HMDB0010412	QI165	m/z794.7209 RT1.63 (QI165)	794.721	1.63	HILIC	FALSE	TRUE	1.41649	1.25666	1.59665	1.2e-08	3.38e-07	1700	1.3214	1.1619	1.5028	2.17e-05	0.00130576	1641
NA	QI6578	m/z552.4029 RT7.72 (QI6578)	552.403	7.72	HILIC	FALSE	TRUE	0.778243	0.713657	0.848675	1.41e-08	3.91e-07	1700	0.813361	0.739426	0.894689	2.15e-05	0.00130576	1641
NA	QI2668	m/z225.0728 RT2.99 (QI2668)	225.073	2.99	HILIC	FALSE	TRUE	1.42877	1.26169	1.61797	1.87e-08	5.11e-07	1700	1.29886	1.12515	1.4994	0.000357547	0.00831977	1641
HMDB0000670	TF19	Homoarginine	189.135	9.42	HILIC	TRUE	TRUE	1.40932	1.25015	1.58876	2.01e-08	5.42e-07	1700	1.24714	1.10329	1.40974	0.00041247	0.00897771	1641
NA	QI694	m/z397.3814 RT1.84 (QI694)	397.381	1.84	HILIC	FALSE	TRUE	0.767166	0.699053	0.841915	2.31e-08	6.14e-07	1700	0.870802	0.785316	0.965594	0.00868832	0.0749512	1641
HMDB0000159	TF26	Phenylalanine	166.086	6.9	HILIC	TRUE	TRUE	1.40884	1.24843	1.58986	2.73e-08	7.07e-07	1700	1.19696	1.05389	1.35946	0.00563925	0.0567139	1641
NA	QI270	m/z584.5246 RT1.7 (QI270)	584.525	1.7	HILIC	FALSE	TRUE	1.43	1.26054	1.62225	2.73e-08	7.07e-07	1700	1.28812	1.13231	1.46535	0.000118514	0.00396613	1641
NA	QI6750	m/z661.2991 RT7.99 (QI6750)	661.299	7.99	HILIC	FALSE	TRUE	1.48132	1.28905	1.70227	3.03e-08	7.74e-07	1700	1.23381	1.0789	1.41096	0.00214515	0.0287154	1641
NA	QI5631	m/z366.1389 RT6.25 (QI5631)	366.139	6.25	HILIC	FALSE	TRUE	0.753002	0.680715	0.832966	3.6e-08	8.96e-07	1700	0.798994	0.721769	0.884482	1.51e-05	0.00104675	1641
NA	QI9998	m/z226.0449 RT6.99 (QI9998)	226.045	6.99	HILIC	FALSE	TRUE	1.38781	1.23496	1.55957	3.7e-08	8.98e-07	1700	1.19989	1.05639	1.36288	0.00504501	0.0524242	1641
NA	QI843	m/z568.427 RT1.88 (QI843)	568.427	1.88	HILIC	FALSE	TRUE	0.752428	0.679953	0.832628	3.7e-08	8.98e-07	1700	0.893924	0.804121	0.993756	0.0379006	0.183445	1641
HMDB0002268	QI338	m/z552.4321 RT1.74 (QI338)	552.432	1.74	HILIC	FALSE	TRUE	0.753972	0.68074	0.835081	6.05e-08	1.38e-06	1700	0.888744	0.800079	0.987234	0.027838	0.153504	1641
NA	QI2551	m/z546.2549 RT2.83 (QI2551)	546.255	2.83	HILIC	FALSE	TRUE	1.4241	1.25263	1.61905	6.63e-08	1.5e-06	1700	1.21732	1.06201	1.39534	0.00474379	0.0508713	1641
NA	QI12070	m/z575.5031 RT5.06 (QI12070)	575.503	5.06	HILIC	FALSE	TRUE	1.38425	1.23001	1.55784	6.87e-08	1.53e-06	1700	1.27384	1.12938	1.43677	8.11e-05	0.00299939	1641
NA	QI11886	m/z280.1504 RT5.26 (QI11886)	280.15	5.26	HILIC	FALSE	TRUE	1.39367	1.23465	1.57318	7.87e-08	1.74e-06	1700	1.24978	1.10424	1.41451	0.000416277	0.00897771	1641
NA	QI9464	m/z558.295 RT7.93 (QI9464)	558.295	7.93	HILIC	FALSE	TRUE	0.722602	0.64121	0.814325	9.89e-08	2.16e-06	1700	0.836865	0.739339	0.947255	0.00484606	0.0514	1641
HMDB0000187	QI6688	m/z181.9615 RT7.82 (QI6688)	181.962	7.82	HILIC	FALSE	TRUE	0.746552	0.669791	0.832111	1.29e-07	2.77e-06	1700	0.773807	0.689723	0.868142	1.25e-05	0.0009705	1641
NA	QI2727	m/z191.055 RT3.08 (QI2727)	191.055	3.08	HILIC	FALSE	TRUE	1.46951	1.27382	1.69527	1.3e-07	2.77e-06	1700	1.3293	1.14716	1.54037	0.000153205	0.00450562	1641
NA	QI9917	m/z329.1416 RT7.11 (QI9917)	329.142	7.11	HILIC	FALSE	TRUE	1.40847	1.23813	1.60224	1.91e-07	3.99e-06	1700	1.24503	1.09144	1.42022	0.00110394	0.0186326	1641
HMDB0007883	QI6074	PC(34:4)	754.537	6.77	HILIC	TRUE	TRUE	1.36933	1.21574	1.54231	2.24e-07	4.62e-06	1700	1.31114	1.15533	1.48798	2.71e-05	0.00146114	1641
NA	QI6599	m/z544.3158 RT7.74 (QI6599)	544.316	7.74	HILIC	FALSE	TRUE	0.774093	0.70224	0.853298	2.58e-07	5.15e-06	1700	0.817249	0.738408	0.904509	9.66e-05	0.00341263	1641
NA	QI15846	m/z550.4168 RT1.75 (QI15846)	550.417	1.75	HILIC	FALSE	TRUE	0.758743	0.683107	0.842754	2.56e-07	5.15e-06	1700	0.881279	0.790904	0.98198	0.0220576	0.134334	1641
NA	QI4805	m/z690.506 RT5.71 (QI4805)	690.506	5.71	HILIC	FALSE	TRUE	1.38465	1.22335	1.56722	2.6e-07	5.15e-06	1700	1.29492	1.14018	1.47066	6.88e-05	0.00267082	1641
NA	QI9376	m/z631.3092 RT8.09 (QI9376)	631.309	8.09	HILIC	FALSE	TRUE	0.770343	0.696925	0.851496	3.29e-07	6.32e-06	1700	0.825964	0.743811	0.917189	0.000347351	0.00822205	1641
HMDB0002815	QI6711	LPC(18:1)	522.355	7.88	HILIC	TRUE	TRUE	0.749871	0.671256	0.837694	3.5e-07	6.66e-06	1700	0.844789	0.753416	0.947245	0.0038778	0.0446104	1641
HMDB0000172	TF22	Isoleucine	132.102	7.29	HILIC	TRUE	TRUE	1.39075	1.22395	1.5803	4.19e-07	7.75e-06	1700	1.24208	1.08891	1.4168	0.00124507	0.0204803	1641
NA	QI16030	m/z581.4347 RT1.63 (QI16030)	581.435	1.63	HILIC	FALSE	TRUE	0.805324	0.73955	0.876948	6.34e-07	1.14e-05	1700	0.892718	0.815308	0.977478	0.0141989	0.100303	1641
NA	QI12506	m/z228.1077 RT4.66 (QI12506)	228.108	4.66	HILIC	FALSE	TRUE	1.33861	1.19331	1.50161	6.54e-07	1.16e-05	1700	1.23618	1.09836	1.39129	0.000439001	0.00936375	1641
NA	QI263	m/z311.2578 RT1.69 (QI263)	311.258	1.69	HILIC	FALSE	TRUE	1.37279	1.21119	1.55594	7.1e-07	1.25e-05	1700	1.23759	1.09024	1.40485	0.00098176	0.0176444	1641
NA	QI11226	m/z579.2928 RT5.81 (QI11226)	579.293	5.81	HILIC	FALSE	TRUE	1.3518	1.19932	1.52367	7.96e-07	1.39e-05	1700	1.16761	1.03137	1.32185	0.0143659	0.100303	1641
HMDB0010386	QI9461	LPC(18:2)	542.322	7.93	HILIC	TRUE	TRUE	0.749915	0.668759	0.84092	8.44e-07	1.46e-05	1700	0.825572	0.733213	0.929564	0.00154233	0.023494	1641
HMDB0013122	QI6543	LPC(P-18:0)/LPC(O-18:1)	508.376	7.67	HILIC	TRUE	TRUE	0.77063	0.694466	0.855147	9.24e-07	1.59e-05	1700	0.842605	0.759705	0.934552	0.00119145	0.0198659	1641
HMDB0010419	QI157	TG(46:2)	792.706	1.62	HILIC	TRUE	TRUE	1.32419	1.18345	1.48167	9.69e-07	1.65e-05	1700	1.26601	1.1214	1.42926	0.00013815	0.00418983	1641
HMDB0000687	TF24	Leucine	132.102	7.16	HILIC	TRUE	TRUE	1.37519	1.20799	1.56555	1.46e-06	2.41e-05	1700	1.22804	1.07659	1.40079	0.00222192	0.0289446	1641
NA	QI2940	m/z238.1072 RT3.52 (QI2940)	238.107	3.52	HILIC	FALSE	TRUE	1.29279	1.16445	1.43527	1.48e-06	2.41e-05	1700	1.17678	1.0422	1.32874	0.00861565	0.074797	1641
NA	QI9210	m/z191.9823 RT8.32 (QI9210)	191.982	8.32	HILIC	FALSE	TRUE	1.33045	1.18385	1.49521	1.64e-06	2.65e-05	1700	1.19414	1.05839	1.34732	0.00395729	0.0451829	1641
NA	QI6556	m/z162.0759 RT7.69 (QI6556)	162.076	7.69	HILIC	FALSE	TRUE	1.33089	1.18347	1.49667	1.82e-06	2.9e-05	1700	1.12472	0.994375	1.27215	0.0614555	0.243443	1641
NA	QI10136	m/z796.5832 RT6.7 (QI10136)	796.583	6.7	HILIC	FALSE	TRUE	0.765919	0.686412	0.854635	1.85e-06	2.92e-05	1700	0.842963	0.758208	0.937193	0.00157912	0.0237602	1641
HMDB0000162	QI9212	Proline	116.071	8.32	HILIC	TRUE	TRUE	1.32088	1.17709	1.48224	2.22e-06	3.48e-05	1700	1.16799	1.03492	1.31816	0.0118616	0.091371	1641
HMDB0009012	QI4653	PE(40:6)	792.552	5.56	HILIC	TRUE	TRUE	1.33136	1.18158	1.50013	2.6e-06	3.94e-05	1700	1.25198	1.10752	1.41529	0.000327416	0.00795959	1641
NA	QI13740	m/z429.2998 RT2.7 (QI13740)	429.3	2.7	HILIC	FALSE	TRUE	1.39475	1.21372	1.60278	2.72e-06	4.09e-05	1700	1.27185	1.11169	1.45509	0.000462004	0.00974728	1641
NA	QI12439	m/z210.0973 RT4.71 (QI12439)	210.097	4.71	HILIC	FALSE	TRUE	1.30407	1.16701	1.45724	2.79e-06	4.13e-05	1700	1.2381	1.10304	1.38969	0.000289969	0.00740566	1641
NA	QI11989	m/z301.1391 RT5.14 (QI11989)	301.139	5.14	HILIC	FALSE	TRUE	1.29923	1.16407	1.45009	3e-06	4.41e-05	1700	1.17741	1.04781	1.32303	0.00605092	0.0605404	1641
HMDB0000688	QI9447	CAR(5:0)	246.17	7.98	HILIC	TRUE	TRUE	1.30412	1.16651	1.45795	3.06e-06	4.47e-05	1700	1.18183	1.04649	1.33467	0.00709737	0.0662307	1641
HMDB0007021	QI201	m/z577.5184 RT1.67 (QI201)	577.518	1.67	HILIC	FALSE	TRUE	1.30141	1.16503	1.45375	3.1e-06	4.49e-05	1700	1.1435	1.01692	1.28583	0.0250767	0.146168	1641
NA	QI9672	m/z306.0748 RT7.63 (QI9672)	306.075	7.63	HILIC	FALSE	TRUE	0.769029	0.687213	0.860586	4.74e-06	6.76e-05	1700	0.852435	0.757936	0.958716	0.00773943	0.0695474	1641
NA	QI972	m/z316.1175 RT1.93 (QI972)	316.118	1.93	HILIC	FALSE	TRUE	0.782873	0.704836	0.86955	4.9e-06	6.89e-05	1700	0.891057	0.795818	0.997694	0.0454999	0.204434	1641
NA	QI16184	m/z716.5659 RT1.41 (QI16184)	716.566	1.41	HILIC	FALSE	TRUE	0.764282	0.680987	0.857765	4.97e-06	6.94e-05	1700	0.850837	0.75552	0.95818	0.00770664	0.0695474	1641
NA	QI12942	m/z241.093 RT3.99 (QI12942)	241.093	3.99	HILIC	FALSE	TRUE	1.28993	1.1553	1.44026	5.99e-06	8.25e-05	1700	1.1744	1.042	1.32364	0.00843872	0.0744525	1641
HMDB0000168	QI6807	Asparagine	133.061	8.08	HILIC	TRUE	TRUE	0.768993	0.685973	0.86206	6.59e-06	8.88e-05	1700	0.883365	0.783618	0.99581	0.0424936	0.196129	1641
NA	QI4080	m/z599.5034 RT5.01 (QI4080)	599.503	5.01	HILIC	FALSE	TRUE	1.29529	1.15611	1.45123	8.15e-06	0.000109098	1700	1.22922	1.09141	1.38444	0.000669794	0.0125701	1641
NA	QI5815	m/z506.3252 RT6.39 (QI5815)	506.325	6.39	HILIC	FALSE	TRUE	0.803349	0.729558	0.884604	8.42e-06	0.000111178	1700	0.913059	0.8231	1.01285	0.085672	0.301876	1641
NA	QI15568	m/z177.1637 RT1.83 (QI15568)	177.164	1.83	HILIC	FALSE	TRUE	0.782192	0.701712	0.871902	9.23e-06	0.00012105	1700	0.853578	0.760847	0.957611	0.00697278	0.0653824	1641
NA	QI3190	m/z347.0869 RT3.88 (QI3190)	347.087	3.88	HILIC	FALSE	TRUE	1.1951	1.10401	1.2937	1.05e-05	0.00013497	1700	1.12008	1.02218	1.22735	0.015098	0.103919	1641
NA	QI4039	m/z410.0508 RT4.96 (QI4039)	410.051	4.96	HILIC	FALSE	TRUE	1.33346	1.17308	1.51578	1.08e-05	0.000137913	1700	1.0693	0.934343	1.22375	0.330358	0.645095	1641
NA	QI3819	m/z233.0631 RT4.78 (QI3819)	233.063	4.78	HILIC	FALSE	TRUE	1.30708	1.15993	1.47291	1.11e-05	0.000140932	1700	1.22598	1.089	1.38019	0.000750474	0.013873	1641
NA	QI10325	m/z468.3086 RT6.43 (QI10325)	468.309	6.43	HILIC	FALSE	TRUE	0.805778	0.731694	0.887363	1.14e-05	0.000142757	1700	0.882859	0.797063	0.977891	0.0169132	0.110907	1641
HMDB0007023	QI15942	DG(34:3)	608.525	1.69	HILIC	TRUE	TRUE	1.29074	1.15154	1.44676	1.17e-05	0.000145575	1700	1.18657	1.05547	1.33395	0.00418797	0.0472608	1641
HMDB0000824	QI7088	CAR(3:0)	218.139	8.54	HILIC	TRUE	TRUE	1.31442	1.16296	1.48562	1.2e-05	0.000148962	1700	1.14129	1.00793	1.29229	0.0371051	0.182332	1641
NA	QI6298	m/z134.1085 RT7.19 (QI6298)	134.108	7.19	HILIC	FALSE	TRUE	1.33713	1.17387	1.52309	1.23e-05	0.000149214	1700	1.23437	1.0804	1.41028	0.00195059	0.0272381	1641
NA	QI6698	m/z548.3694 RT7.84 (QI6698)	548.369	7.84	HILIC	FALSE	TRUE	0.784027	0.703013	0.874377	1.23e-05	0.000149214	1700	0.865796	0.774013	0.968464	0.0117217	0.0910073	1641
NA	QI11391	m/z330.1393 RT5.7 (QI11391)	330.139	5.7	HILIC	FALSE	TRUE	1.25649	1.13426	1.39189	1.23e-05	0.000149214	1700	1.13938	0.998791	1.29976	0.0521428	0.21915	1641
NA	NA	Kynurenine	NA	NA	AMIDE	TRUE	TRUE	1.29186	1.15102	1.44993	1.37e-05	0.000165166	1700	1.18217	1.04386	1.3388	0.00838458	0.0743126	1641
NA	QI4077	m/z235.0925 RT4.99 (QI4077)	235.093	4.99	HILIC	FALSE	TRUE	1.30312	1.15645	1.46838	1.39e-05	0.000166543	1700	1.2254	1.08807	1.38007	0.000803325	0.0147099	1641
NA	QI8748	m/z185.0688 RT9.59 (QI8748)	185.069	9.59	HILIC	FALSE	TRUE	1.3084	1.15723	1.47932	1.78e-05	0.000211962	1700	1.19124	1.04756	1.35462	0.00761798	0.0690958	1641
HMDB0013122	QI6754	LPC(P-18:0)/LPC(O-18:1)	508.376	8	HILIC	TRUE	TRUE	0.792182	0.711778	0.881669	1.99e-05	0.000234096	1700	0.824842	0.742909	0.915812	0.000309092	0.00779153	1641
NA	NA	Palmitic Acid	NA	NA	AMIDE	TRUE	TRUE	1.43697	1.21629	1.69769	2.03e-05	0.000237363	1090	1.27391	1.06961	1.51722	0.00663702	0.0644123	1052
NA	QI4001	m/z162.0759 RT4.93 (QI4001)	162.076	4.93	HILIC	FALSE	TRUE	1.27113	1.13721	1.42083	2.4e-05	0.000278946	1700	1.08436	0.960384	1.22433	0.191074	0.474264	1641
NA	QI228	m/z682.539 RT1.68 (QI228)	682.539	1.68	HILIC	FALSE	TRUE	1.32306	1.16152	1.50707	2.51e-05	0.000289995	1700	1.23378	1.08059	1.40868	0.00189689	0.0270013	1641
NA	QI6923	m/z578.3218 RT8.24 (QI6923)	578.322	8.24	HILIC	FALSE	TRUE	0.814306	0.739801	0.896314	2.72e-05	0.000312398	1700	0.856787	0.770133	0.953192	0.0044949	0.0492915	1641
HMDB0011441	QI4677	PE(P-36:2)/PE(O-36:3)	728.558	5.6	HILIC	TRUE	TRUE	0.786499	0.702875	0.880072	2.82e-05	0.000321978	1700	0.833617	0.742731	0.935624	0.00200338	0.0275395	1641
HMDB0011512	QI9458	LPC(17:1)	508.34	7.94	HILIC	TRUE	TRUE	0.79366	0.711709	0.885047	3.24e-05	0.00036563	1700	0.838593	0.749618	0.938128	0.00209773	0.0282757	1641
NA	QI6971	m/z461.0722 RT8.3 (QI6971)	461.072	8.3	HILIC	FALSE	TRUE	1.29517	1.14625	1.46343	3.32e-05	0.000372492	1700	1.18068	1.03937	1.34121	0.0106603	0.0851508	1641
NA	QI6123	m/z190.0862 RT6.89 (QI6123)	190.086	6.89	HILIC	FALSE	TRUE	1.28154	1.13922	1.44163	3.62e-05	0.00040151	1700	1.16576	1.03112	1.31798	0.014311	0.100303	1641
NA	QI9632	m/z592.47 RT7.7 (QI9632)	592.47	7.7	HILIC	FALSE	TRUE	0.821647	0.748202	0.9023	3.92e-05	0.000432314	1700	0.865971	0.783002	0.957732	0.00510402	0.0526963	1641
NA	QI4027	m/z203.0526 RT4.95 (QI4027)	203.053	4.95	HILIC	FALSE	TRUE	1.26928	1.13224	1.42291	4.31e-05	0.000472639	1700	1.01045	0.888585	1.14902	0.874068	0.961227	1641
HMDB0003331	QI6715	m/z320.0749 RT7.88 (QI6715)	320.075	7.88	HILIC	FALSE	TRUE	1.26314	1.12897	1.41325	4.56e-05	0.000497245	1700	1.2005	1.07	1.34691	0.0018568	0.0266967	1641
NA	QI6570	m/z332.2427 RT7.71 (QI6570)	332.243	7.71	HILIC	FALSE	TRUE	0.811687	0.734055	0.89753	4.75e-05	0.00051507	1700	0.846363	0.759389	0.943298	0.00256921	0.0322304	1641
HMDB0010407	QI9559	LPC(P-16:0)/LPC(O-16:1)	480.345	7.76	HILIC	TRUE	TRUE	0.797143	0.7144	0.889469	5.02e-05	0.000541118	1700	0.818616	0.733292	0.913869	0.000365593	0.00834842	1641
NA	QI12583	m/z538.5198 RT4.57 (QI12583)	538.52	4.57	HILIC	FALSE	TRUE	0.801643	0.720219	0.892273	5.22e-05	0.000559362	1700	0.875189	0.788309	0.971645	0.0124469	0.0929209	1641
NA	QI11739	m/z464.2178 RT5.39 (QI11739)	464.218	5.39	HILIC	FALSE	TRUE	0.781933	0.693934	0.881093	5.39e-05	0.000572754	1700	0.801624	0.709645	0.905524	0.000376631	0.00844909	1641
HMDB0042077	QI155	TG(46:3)	790.69	1.61	HILIC	TRUE	TRUE	1.27116	1.13141	1.42816	5.4e-05	0.000572754	1700	1.22873	1.08581	1.39046	0.00109484	0.0186326	1641
HMDB0002013	QI6911	CAR(4:0)	232.154	8.22	HILIC	TRUE	TRUE	1.26534	1.12864	1.41859	5.47e-05	0.000577068	1700	1.18059	1.04587	1.33265	0.00724099	0.0670445	1641
NA	QI12731	m/z125.0348 RT4.36 (QI12731)	125.035	4.36	HILIC	FALSE	TRUE	1.282	1.13613	1.44659	5.56e-05	0.000583349	1700	1.16818	1.02937	1.3257	0.0160173	0.10795	1641
NA	QI9541	m/z193.9983 RT7.78 (QI9541)	193.998	7.78	HILIC	FALSE	TRUE	1.29432	1.14153	1.46756	5.69e-05	0.000593779	1700	1.15578	1.01629	1.31442	0.0273748	0.153379	1641
HMDB0000162	QI6976	m/z138.0524 RT8.31 (QI6976)	138.052	8.31	HILIC	FALSE	TRUE	1.27345	1.13171	1.43293	5.94e-05	0.000616553	1700	1.11617	0.98902	1.25967	0.0749049	0.273857	1641
NA	QI9368	m/z151.951 RT8.1 (QI9368)	151.951	8.1	HILIC	FALSE	TRUE	0.802642	0.720898	0.893655	6.03e-05	0.000622565	1700	0.867173	0.77395	0.971625	0.0140485	0.100303	1641
NA	QI6704	m/z165.9876 RT7.86 (QI6704)	165.988	7.86	HILIC	FALSE	TRUE	0.823664	0.749093	0.905658	6.16e-05	0.000629293	1700	0.83887	0.754985	0.932075	0.00108105	0.0186061	1641
NA	QI4288	m/z263.0735 RT5.24 (QI4288)	263.074	5.24	HILIC	FALSE	TRUE	1.25946	1.12506	1.40992	6.16e-05	0.000629293	1700	1.13419	1.00569	1.2791	0.0401257	0.188351	1641
NA	QI5468	m/z274.2738 RT6.13 (QI5468)	274.274	6.13	HILIC	FALSE	TRUE	0.789654	0.703344	0.886556	6.36e-05	0.000646323	1700	0.698101	0.617843	0.788784	8.04e-09	7.8e-06	1641
NA	QI10141	m/z780.5884 RT6.69 (QI10141)	780.588	6.69	HILIC	FALSE	TRUE	0.79271	0.707065	0.888728	6.83e-05	0.00069047	1700	0.827288	0.738366	0.92692	0.0010832	0.0186061	1641
NA	QI9469	m/z104.1072 RT7.92 (QI9469)	104.107	7.92	HILIC	FALSE	TRUE	0.810092	0.730066	0.898889	7.23e-05	0.000727121	1700	0.845509	0.758111	0.942983	0.00257378	0.0322304	1641
HMDB0008359	QI10057	m/z796.6175 RT6.91 (QI10057)	796.617	6.91	HILIC	FALSE	TRUE	0.802024	0.719202	0.894382	7.27e-05	0.000727715	1700	0.84993	0.76029	0.950138	0.00424408	0.0476171	1641
NA	QI13343	m/z416.2643 RT3.32 (QI13343)	416.264	3.32	HILIC	FALSE	TRUE	1.27939	1.13197	1.44601	8e-05	0.000792245	1700	1.20368	1.05809	1.3693	0.00482579	0.0514	1641
NA	QI6377	m/z343.787 RT7.39 (QI6377)	343.787	7.39	HILIC	FALSE	TRUE	0.810431	0.729948	0.899789	8.19e-05	0.00080718	1700	0.86087	0.773025	0.958698	0.00637108	0.0630932	1641
NA	QI13618	m/z197.0809 RT2.86 (QI13618)	197.081	2.86	HILIC	FALSE	TRUE	1.26911	1.12652	1.42975	8.88e-05	0.000868085	1700	1.14967	1.00996	1.30871	0.0348745	0.176194	1641
NA	QI7430	m/z499.2532 RT9.58 (QI7430)	499.253	9.58	HILIC	FALSE	TRUE	1.29864	1.13889	1.4808	9.55e-05	0.000926828	1700	1.22038	1.06177	1.40267	0.00505066	0.0524242	1641
NA	QI970	m/z401.3404 RT1.93 (QI970)	401.34	1.93	HILIC	FALSE	TRUE	1.2519	1.11771	1.40221	0.000102962	0.000984479	1700	1.20797	1.07582	1.35635	0.00139221	0.0219698	1641
NA	QI12448	m/z306.2788 RT4.71 (QI12448)	306.279	4.71	HILIC	FALSE	TRUE	0.803685	0.719348	0.89791	0.000111652	0.00105715	1700	0.857284	0.765818	0.959674	0.00747256	0.0684162	1641
NA	QI2479	m/z131.0492 RT2.74 (QI2479)	131.049	2.74	HILIC	FALSE	TRUE	0.816394	0.735935	0.905649	0.00012707	0.00118578	1700	0.862645	0.772634	0.963143	0.00859209	0.074797	1641
[truncated: 174 more rows]

## Sheet: Tbl6
Supplemental Table 6: Reported Associations in the Literature of JHS Targeted or "Known"Diabetes Associated Compounds
[truncated: 42 more rows]

[truncated: 8 more sheets: Tbl7, Tbl8, Tbl9, Tbl10, Tbl11, Tbl12, Tbl13, Tbl14]
